# Supplementary material for: HPP-induced transcriptome response during recovery of Listeria monocytogenes
Source: Research Square preprint supplement (doi:10.21203/rs.3.rs-112830/v1), 2020-11-24
Supplement: Supplementary file 1 [file 41a8fa95896f09d6ec713664.xlsx]

## Sheet: RO15
	2Ro15_1_T0	2Ro15_2_T5	2Ro15_3_T5	2Ro15_4_T0	2Ro15_4_T5	2Ro15_5_T0	2Ro15_1_T10	2Ro15_1_T30	2Ro15_3_T30	2Ro15_4_T10	2Ro15_4_T30	2Ro15_5_T10	2Ro15_1_T45	2Ro15_1_T60	2Ro15_3_T45	2Ro15_3_T60	2Ro15_4_T45	2Ro15_4_T60	2Ro15_1_T48h	2Ro15_2_T6h	2Ro15_1_T24h	2Ro15_3_T6h	2Ro15_2_T24h	2Ro15_3_T48h	2Ro15_5_T6h	2Ro15_5_T24h	2Ro15_4_T48h	4Ro15_2_T0	4Ro15_1_T5	4Ro15_3_T0	4Ro15_2_T5	4Ro15_3_T5	4Ro15_4_T0	4Ro15_2_T10	4Ro15_1_T30	4Ro15_3_T10	4Ro15_3_T30	4Ro15_4_T10	4Ro15_5_T30	4Ro15_2_T45	4Ro15_1_T60	4Ro15_3_T45	4Ro15_2_T60	4Ro15_1_T48h	4Ro15_5_T45	4Ro15_5_T60	4Ro15_2_T48h	4Ro15_2_T6h	4Ro15_1_T24h
Locus_tag/Sample_ID	R_001	R_009	R_010	R_013	R_015	R_017	R_021	R_025	R_030	R_033	R_035	R_037	R_041	R_045	R_047	R_050	R_053	R_055	R_057	R_066	R_069	R_071	R_073	R_081	R_083	R_085	R_087	R_090	R_093	R_095	R_097	R_098	R_101	R_110	R_113	R_115	R_118	R_121	R_127	R_130	R_133	R_135	R_137	R_145	R_147	R_149	R_151	R_154	R_157
OCPFDLNE_00001	25	29	13	12	15	29	29	46	50	38	25	56	96	26	51	93	52	25	10	67	21	42	49	101	61	45	61	40	31	28	23	34	36	11	29	37	34	40	30	44	58	60	48	52	50	33	39	102	35
OCPFDLNE_00002	30	35	20	19	18	34	28	51	36	31	44	81	98	24	46	54	38	16	18	66	30	51	41	67	75	45	70	32	32	21	29	32	41	25	18	34	52	34	28	47	55	43	43	44	32	25	33	82	23
OCPFDLNE_00003	1	1	0	1	1	1	3	2	2	2	1	2	21	2	8	3	1	2	0	2	2	4	4	2	6	1	1	3	4	0	2	10	0	2	3	2	2	4	4	0	7	3	4	5	1	3	5	3	2
OCPFDLNE_00004	31	28	17	13	20	44	44	30	54	32	23	55	146	23	43	88	84	19	9	91	33	73	68	119	148	45	73	69	65	45	34	85	111	31	45	64	55	60	75	73	100	117	97	133	97	66	74	204	52
OCPFDLNE_00005	100	147	74	54	60	135	101	97	121	104	118	167	322	81	184	238	208	47	34	195	152	152	169	256	237	146	242	248	193	158	133	229	244	133	208	170	256	242	209	222	274	345	343	404	252	197	274	409	178
OCPFDLNE_00006	181	237	154	100	125	192	142	177	190	176	141	270	388	158	186	383	307	86	64	276	210	212	273	508	395	220	477	378	352	210	162	394	452	200	214	277	318	367	254	215	332	386	348	414	224	203	277	395	199
OCPFDLNE_00007	254	315	223	113	138	357	208	254	333	243	254	458	435	87	246	489	299	66	120	387	287	352	355	809	535	360	713	408	345	233	171	368	475	177	228	222	320	317	244	180	279	312	314	316	255	162	241	353	143
OCPFDLNE_00008	8	10	3	2	9	8	5	11	5	16	7	12	24	6	10	28	8	8	3	22	12	19	20	25	30	14	23	10	15	8	6	6	16	5	7	6	18	12	15	9	14	22	9	19	17	13	19	24	9
OCPFDLNE_00009	2	2	3	1	1	2	5	6	8	5	9	6	6	9	3	4	12	1	0	10	1	4	4	17	8	5	6	3	3	1	1	0	3	6	3	3	5	7	1	9	3	4	3	4	2	4	4	15	2
OCPFDLNE_00010	14	17	12	12	12	17	34	37	50	50	37	53	94	38	58	73	49	18	6	83	38	49	77	65	66	53	62	33	27	18	22	33	31	23	28	44	43	36	40	40	59	71	49	58	64	34	55	111	40
OCPFDLNE_00011	21	29	20	5	10	21	25	35	49	33	25	53	85	19	45	68	58	12	8	63	33	39	77	121	83	54	98	23	39	21	10	39	46	22	24	28	40	44	26	34	41	59	37	49	31	25	36	77	32
OCPFDLNE_00012	21	29	17	11	7	24	18	31	53	28	38	47	75	23	49	104	42	25	10	88	64	64	97	169	128	79	118	42	31	25	28	42	51	18	34	30	49	25	50	35	34	47	41	51	38	15	36	86	35
OCPFDLNE_00013	145	129	104	69	90	168	184	180	175	153	158	303	402	203	196	290	278	92	37	284	92	183	176	259	371	173	183	290	270	149	162	268	299	134	224	247	268	264	268	332	368	461	356	362	328	227	297	659	287
OCPFDLNE_00014	307	366	197	158	170	340	211	262	233	189	246	334	642	334	254	602	428	224	58	510	189	340	345	596	670	301	559	533	480	303	219	475	754	245	365	316	422	486	397	398	548	544	553	620	338	355	406	778	339
OCPFDLNE_00015	142	167	114	67	89	187	89	124	93	85	121	147	182	251	72	183	117	166	18	143	76	121	112	231	209	107	216	152	124	90	72	173	239	73	108	84	108	133	115	117	137	127	123	132	89	96	105	203	88
OCPFDLNE_00016	21	35	27	20	24	51	18	32	25	28	32	47	36	23	23	42	22	18	4	32	26	16	20	30	24	20	33	18	14	19	13	26	40	10	11	14	37	28	17	27	16	17	20	12	12	16	19	51	9
OCPFDLNE_00017	0	0	0	1	0	0	1	0	0	1	0	0	6	1	1	1	2	0	0	1	1	0	1	0	3	2	4	0	0	0	0	3	0	0	0	0	0	0	1	0	0	0	0	0	0	0	0	1	0
OCPFDLNE_00018	7	5	4	2	2	6	8	5	6	10	9	10	20	5	4	8	8	6	4	13	4	15	14	11	20	8	20	5	19	13	2	5	11	9	9	9	10	9	8	10	15	7	13	13	5	3	10	23	5
OCPFDLNE_00019	27	25	8	22	23	43	40	72	51	48	51	101	76	18	38	46	37	8	12	68	26	54	41	75	67	47	80	36	49	10	25	28	71	23	33	48	33	45	28	53	65	65	76	65	71	55	71	101	47
OCPFDLNE_00020	3	3	0	0	1	3	0	2	0	1	1	8	11	1	1	0	2	0	1	3	2	2	4	3	6	2	3	4	4	2	1	2	10	0	1	4	6	0	3	4	9	1	6	4	2	1	4	13	3
OCPFDLNE_00021	0	1	1	1	0	3	1	0	0	1	0	2	2	2	2	2	1	2	0	1	1	1	3	2	1	2	1	0	2	1	0	0	3	1	0	0	2	0	0	0	2	1	0	1	0	1	4	1	1
OCPFDLNE_00022	3	1	1	0	1	0	0	0	1	1	0	2	3	2	0	0	0	1	1	0	1	2	1	0	2	0	2	1	2	0	0	0	2	1	1	0	1	2	2	0	1	0	1	0	0	1	2	1	1
OCPFDLNE_00023	1	0	0	0	0	0	1	0	0	0	0	0	7	2	0	1	3	0	0	0	1	0	1	2	0	0	3	0	0	0	1	1	0	0	1	1	0	1	2	1	0	0	0	4	1	1	1	0	0
OCPFDLNE_00024	0	1	1	0	2	1	0	1	0	1	1	0	2	0	1	4	0	1	0	2	1	2	1	3	0	3	1	0	1	0	0	1	2	0	0	0	0	1	0	4	0	2	0	1	0	1	3	2	0
OCPFDLNE_00025	7	9	4	1	4	8	5	8	8	7	9	14	13	4	2	8	2	3	0	7	2	11	5	9	5	2	7	7	9	2	3	3	3	3	1	6	4	0	4	6	8	4	3	6	4	3	3	14	6
OCPFDLNE_00026	0	0	0	0	0	0	0	1	0	0	0	0	8	1	0	0	0	0	0	0	0	1	2	2	1	0	1	0	0	0	2	0	0	0	0	0	0	2	0	0	0	0	1	0	1	0	0	1	0
OCPFDLNE_00027	13	16	8	6	4	20	12	11	13	7	15	19	66	12	29	45	16	18	7	19	9	14	10	22	31	18	22	12	19	17	9	24	24	15	22	11	14	14	16	37	26	38	30	32	39	28	29	30	24
OCPFDLNE_00028	5	9	0	1	2	5	5	6	7	5	4	10	14	10	7	10	5	5	1	12	10	7	6	7	15	13	6	6	6	2	3	4	11	2	5	3	5	4	3	10	5	8	7	3	11	8	9	20	4
OCPFDLNE_00029	1	0	1	0	0	0	0	1	2	0	0	0	7	1	0	2	1	0	0	0	1	2	2	3	3	4	1	2	0	0	1	1	3	0	0	2	1	0	1	0	0	0	1	0	0	0	1	3	0
OCPFDLNE_00030	0	0	0	0	0	0	0	1	0	0	0	0	5	0	2	2	0	1	0	2	0	0	2	0	0	0	0	0	0	0	0	1	2	0	0	1	0	0	0	0	0	1	0	0	1	0	2	3	0
OCPFDLNE_00031	0	0	0	1	1	0	0	1	0	0	1	0	2	1	0	0	2	0	0	0	0	0	0	0	2	0	0	0	0	0	0	0	0	0	0	0	0	0	0	0	0	0	0	1	0	0	1	1	0
OCPFDLNE_00032	0	1	0	1	0	0	0	0	0	1	1	0	1	0	0	1	2	0	0	1	0	0	3	1	0	0	1	0	0	0	0	0	0	0	0	0	0	0	1	0	1	1	1	1	0	0	3	1	1
OCPFDLNE_00033	0	0	0	0	0	0	0	0	1	0	2	1	4	0	1	1	1	0	0	0	1	1	1	0	1	0	0	0	1	0	0	1	0	0	0	0	1	0	1	1	1	1	0	0	1	1	0	1	1
OCPFDLNE_00034	0	0	2	0	0	1	1	0	0	2	1	4	1	0	1	3	1	1	0	1	3	1	3	2	1	1	0	0	0	0	1	1	0	0	0	7	1	2	0	1	1	1	1	0	0	1	1	4	2
OCPFDLNE_00035	24	49	31	33	23	105	70	132	103	90	89	140	224	8	72	51	63	13	24	120	74	55	43	60	78	51	36	39	24	24	43	22	66	14	28	33	59	28	48	46	30	28	38	27	39	20	35	79	49
OCPFDLNE_00036	6	10	9	5	12	15	7	22	18	2	14	22	40	7	18	36	8	4	5	22	13	16	12	39	24	16	28	8	9	10	7	12	18	6	9	10	24	20	15	17	9	20	18	8	16	12	20	34	12
OCPFDLNE_00037	13	16	5	7	7	22	13	16	17	14	8	32	43	10	26	33	21	8	1	23	14	13	15	24	33	23	21	16	15	8	17	26	20	15	17	21	20	17	18	28	23	38	16	45	22	21	24	39	17
OCPFDLNE_00038	0	2	1	1	2	1	1	1	1	0	2	1	10	5	3	5	3	10	1	0	0	2	3	2	1	2	6	3	2	0	5	2	4	2	3	1	2	3	0	0	3	5	0	2	1	0	3	3	5
OCPFDLNE_00039	0	2	0	0	1	0	0	2	2	2	2	3	16	19	9	6	6	7	2	12	6	3	2	8	7	2	10	3	13	2	2	4	7	1	1	3	7	5	3	3	4	8	2	6	4	1	5	13	5
OCPFDLNE_00040	2	1	0	1	0	0	0	0	0	0	1	1	5	6	0	1	0	3	0	4	0	1	0	4	1	0	5	2	1	2	0	0	0	0	0	1	1	0	0	0	1	3	1	0	3	0	1	1	1
OCPFDLNE_00041	4	2	1	1	0	0	0	1	0	1	0	4	5	6	0	1	2	2	0	0	1	1	7	4	10	5	1	1	2	1	1	3	1	1	1	1	1	2	2	3	1	3	1	3	0	0	3	1	3
OCPFDLNE_00042	9	11	2	5	4	8	7	9	6	3	5	8	21	13	7	12	10	17	0	4	8	4	3	4	15	6	7	13	10	8	4	9	12	12	5	6	6	5	7	8	10	8	7	13	12	6	3	17	6
OCPFDLNE_00043	4	8	8	2	4	3	2	2	1	12	3	6	13	9	7	13	4	10	0	7	7	2	3	4	8	3	3	8	16	5	5	6	12	3	2	4	2	7	7	8	6	11	7	5	2	7	7	15	9
OCPFDLNE_00044	14	7	7	4	8	7	5	5	15	11	6	6	15	24	5	8	9	10	0	19	3	10	8	11	10	12	14	15	21	8	7	14	29	17	12	4	13	13	11	10	18	14	16	22	10	13	10	29	13
OCPFDLNE_00045	15	9	10	9	8	15	9	13	8	13	8	13	17	12	8	19	5	8	4	15	7	9	7	15	14	10	10	14	15	11	11	24	9	7	12	12	13	14	6	17	12	18	15	18	5	3	14	28	12
OCPFDLNE_00046	2	0	2	4	2	4	0	4	3	3	4	11	28	4	8	5	8	1	1	4	5	6	6	0	4	0	2	5	5	3	3	4	2	1	4	4	4	8	0	9	4	7	2	8	8	4	7	9	1
OCPFDLNE_00047	3	0	0	2	1	0	2	2	1	4	1	2	9	3	2	1	4	0	1	0	0	3	2	1	5	0	1	4	2	0	4	4	0	1	2	11	5	1	5	6	2	4	4	13	7	3	3	8	1
OCPFDLNE_00048	6	2	1	2	0	2	2	9	6	10	2	16	16	6	8	11	6	5	2	8	6	4	8	21	15	10	18	7	1	6	2	4	7	1	1	3	6	1	3	8	9	8	0	7	17	4	3	21	6
OCPFDLNE_00049	84	58	44	34	26	75	41	64	50	59	48	107	102	30	47	63	73	18	7	60	41	44	37	65	85	33	69	109	107	52	62	67	118	36	56	70	71	65	71	113	89	113	108	104	110	54	97	208	97
OCPFDLNE_00050	159	139	94	73	91	165	93	159	173	166	135	268	277	131	128	161	178	90	22	105	53	106	104	144	154	89	129	188	167	100	117	157	233	62	87	142	163	140	118	145	154	161	139	182	168	93	120	304	87
OCPFDLNE_00051	243	278	191	95	96	281	180	309	307	247	282	445	405	222	267	399	328	207	43	233	124	203	187	315	298	183	257	408	357	216	251	298	487	155	217	289	264	246	263	308	302	307	270	408	302	205	213	582	197
OCPFDLNE_00052	1	10	8	7	4	18	9	12	22	14	12	16	25	9	7	11	6	7	1	9	2	5	6	3	4	3	13	13	8	4	14	4	18	7	4	8	10	8	6	12	12	6	9	8	8	10	9	17	1
OCPFDLNE_00053	354	288	221	203	199	425	492	922	1089	698	700	1303	810	380	546	813	891	240	90	200	393	180	417	793	537	491	591	429	464	314	439	482	939	171	264	446	438	409	452	609	666	697	458	913	1503	496	900	1991	433
OCPFDLNE_00054	7385	7011	4268	3491	3721	9524	5881	8220	6620	5471	4370	12291	9171	2853	3275	6325	4853	2284	410	3631	2121	2887	1751	4673	5651	2063	2672	7613	6370	3854	4971	6329	14195	2870	3633	6011	7276	5067	5977	5014	4464	4461	3727	4657	4594	2670	2766	12624	2854
OCPFDLNE_00055	2172	1375	1124	748	723	2076	879	1205	1835	1458	800	2072	1663	894	1352	1475	1398	552	73	829	487	467	358	527	946	412	340	2377	2091	1142	2075	1815	2774	774	1062	2383	2072	1419	1359	1451	1086	1239	862	405	1040	492	269	1867	469
OCPFDLNE_00056	481	438	268	221	251	494	291	366	374	303	261	460	730	461	391	558	477	244	48	421	306	323	392	642	507	286	515	630	666	339	436	610	587	333	477	647	634	626	489	540	602	520	634	631	391	352	501	899	297
OCPFDLNE_00057	253	233	161	119	147	265	161	229	239	169	194	273	440	308	246	298	239	249	35	273	239	178	193	319	303	172	302	222	203	192	213	278	217	163	234	228	258	233	202	229	191	251	247	200	201	173	223	369	133
OCPFDLNE_00058	83	80	69	30	52	96	72	108	114	98	83	152	188	106	96	145	125	80	29	121	93	95	169	256	178	121	230	131	106	80	65	129	215	62	99	85	112	108	93	134	139	134	150	181	108	93	94	207	71
OCPFDLNE_00059	38	38	28	15	20	25	28	25	39	40	38	39	50	50	33	69	49	34	9	60	41	29	77	95	49	51	85	40	59	41	21	47	44	28	42	37	52	61	49	41	51	49	65	57	35	37	59	55	30
OCPFDLNE_00060	69	90	50	31	43	80	43	57	63	52	66	86	117	55	58	127	107	63	24	100	48	65	95	196	98	51	153	112	74	55	38	80	108	58	58	43	72	74	76	79	53	64	88	81	58	64	62	110	50
OCPFDLNE_00061	20	30	17	5	12	26	28	50	45	32	56	55	74	27	31	58	38	6	16	63	22	39	16	57	86	28	40	37	20	12	21	23	30	8	12	18	24	18	23	28	26	33	25	36	14	15	16	39	21
OCPFDLNE_00062	7	10	5	2	4	16	3	13	10	6	1	9	12	1	5	8	7	2	0	3	4	4	3	5	7	2	1	1	5	3	8	4	14	3	2	7	7	4	11	8	8	6	1	3	12	7	7	12	4
OCPFDLNE_00063	0	1	1	0	1	0	0	1	2	0	0	1	10	0	2	1	0	1	0	1	0	3	0	0	0	0	3	2	1	2	0	0	0	0	2	1	2	1	2	0	3	1	1	2	2	1	0	0	3
OCPFDLNE_00064	0	0	0	0	0	1	0	1	0	1	0	0	1	0	0	0	1	0	0	0	0	0	1	0	0	0	0	1	1	1	0	0	0	1	0	0	1	1	0	1	0	0	0	0	0	1	0	0	0
OCPFDLNE_00065	0	0	0	0	0	0	0	0	0	0	0	0	0	0	0	0	0	0	0	0	0	0	0	0	0	0	0	0	0	0	0	0	0	0	0	0	0	0	0	1	0	0	0	0	0	0	0	0	0
OCPFDLNE_00066	0	0	0	0	0	0	0	0	0	1	0	0	4	0	1	1	0	0	0	0	1	0	0	0	0	0	0	0	0	0	0	0	0	0	1	0	1	1	1	1	0	0	0	2	0	1	0	0	0
OCPFDLNE_00067	0	0	0	1	0	0	0	0	0	0	0	3	22	1	1	1	0	0	0	4	1	0	3	4	3	2	0	2	3	0	1	1	0	0	0	2	4	3	0	0	2	0	4	1	1	3	1	3	2
OCPFDLNE_00068	0	0	0	0	0	0	0	0	0	0	0	1	1	0	1	0	0	0	0	0	0	0	0	0	0	0	0	0	0	0	0	0	0	0	0	0	0	0	0	0	0	0	0	0	0	0	0	0	0
OCPFDLNE_00069	0	0	0	0	0	1	0	0	1	1	0	2	1	0	0	0	0	0	0	0	0	0	0	0	0	0	0	1	0	0	0	0	0	0	0	0	0	0	0	0	0	0	1	0	0	1	0	0	0
OCPFDLNE_00070	0	0	0	2	0	0	0	0	0	1	0	0	5	0	0	1	1	0	0	0	0	0	0	0	1	0	0	0	2	0	0	0	0	0	0	0	0	0	0	0	1	0	0	1	0	0	0	0	0
OCPFDLNE_00071	3	0	3	0	0	3	0	0	2	1	0	4	9	0	2	2	3	0	0	0	4	5	8	3	5	3	3	1	5	0	2	0	1	3	3	0	2	1	5	4	7	4	3	0	0	2	3	5	2
OCPFDLNE_00072	2	1	0	1	2	0	1	1	1	2	2	3	2	0	1	2	2	0	0	0	1	0	2	0	4	3	5	2	2	0	0	2	0	0	0	1	3	1	0	1	1	2	5	0	1	0	2	2	0
OCPFDLNE_00073	2	1	0	1	0	2	0	1	0	5	1	0	1	0	3	0	0	0	0	0	0	2	1	1	1	1	4	1	0	0	0	1	1	1	1	0	0	0	0	2	0	1	1	1	1	2	0	3	0
OCPFDLNE_00074	1	1	0	1	0	1	0	1	0	0	0	1	5	0	0	0	1	0	0	0	0	0	2	2	2	0	3	2	2	1	1	2	0	0	0	1	0	1	1	1	0	0	0	1	1	1	4	1	1
OCPFDLNE_00075	0	0	0	0	0	0	0	0	0	0	0	2	1	0	0	1	0	0	0	0	1	1	0	0	0	0	0	1	1	0	0	0	1	0	0	0	0	0	0	0	0	0	0	0	0	0	0	0	0
OCPFDLNE_00076	0	0	0	0	0	0	0	0	0	0	1	0	0	0	0	0	0	0	0	1	0	0	0	0	0	1	0	0	0	0	0	0	0	0	0	0	0	0	0	0	0	0	0	3	0	0	0	2	1
OCPFDLNE_00077	3	2	0	0	0	1	3	0	1	1	0	0	6	0	1	2	2	6	1	0	1	2	1	5	1	0	3	1	3	2	0	2	3	0	1	2	2	3	1	3	4	3	0	0	1	1	2	2	0
OCPFDLNE_00078	2	1	0	0	0	1	0	0	0	0	2	0	3	1	0	0	1	0	0	0	1	0	1	2	1	0	0	1	2	0	0	0	2	0	0	1	1	0	0	2	0	1	1	1	0	0	2	1	1
OCPFDLNE_00079	2	0	1	1	0	0	0	1	1	1	0	1	7	0	0	0	1	0	0	0	1	0	0	2	1	0	0	0	1	1	0	0	2	1	0	2	1	1	0	1	0	0	0	2	2	0	0	1	0
OCPFDLNE_00080	0	0	0	0	0	0	0	0	0	0	0	0	6	0	0	0	0	0	0	0	0	0	0	0	0	0	0	0	0	0	0	0	0	0	0	0	0	0	0	0	0	0	0	1	0	0	0	0	0
OCPFDLNE_00081	1	0	0	0	3	0	1	0	0	1	1	1	4	0	0	2	1	0	0	0	0	2	0	0	0	0	0	0	0	0	1	0	0	2	0	2	0	0	2	4	2	0	1	0	2	0	0	4	2
OCPFDLNE_00082	0	2	1	0	2	3	1	4	3	5	7	8	13	5	5	6	1	6	7	6	6	9	6	3	7	3	1	9	2	5	4	3	6	0	5	3	7	6	8	8	3	4	8	12	4	2	3	14	5
OCPFDLNE_00083	8	5	3	4	2	7	4	2	3	7	5	11	19	11	10	7	3	18	0	8	2	8	10	17	9	8	10	7	5	2	6	8	8	2	9	4	6	16	2	3	10	4	7	5	3	6	7	12	6
OCPFDLNE_00084	2	3	1	2	0	3	5	7	3	4	1	7	16	3	4	5	8	6	1	2	2	4	3	2	6	3	2	3	1	1	0	1	5	0	2	0	1	6	2	8	2	0	1	3	10	3	4	14	2
OCPFDLNE_00085	51	40	23	21	26	34	39	33	48	35	38	41	72	135	33	70	55	95	9	76	31	54	56	75	68	42	75	76	32	32	28	53	71	32	41	42	51	53	36	52	52	55	60	61	50	37	50	52	45
OCPFDLNE_00087	5	1	5	4	2	4	8	8	8	14	6	8	28	2	20	12	16	1	2	17	18	11	9	16	25	6	14	9	7	4	4	3	6	3	10	10	7	12	6	12	11	7	8	5	13	14	7	23	9
OCPFDLNE_00088	1	0	1	1	1	0	2	0	2	1	1	1	3	0	3	6	1	0	1	2	2	1	1	1	6	0	0	2	4	2	2	1	2	0	1	1	0	1	1	3	1	3	2	0	2	2	3	3	0
OCPFDLNE_00089	0	0	0	3	1	2	1	0	2	1	1	1	3	0	0	2	2	1	0	0	1	0	2	3	1	1	1	2	4	0	0	0	4	2	2	3	3	0	1	1	0	2	2	1	0	2	3	1	0
OCPFDLNE_00090	1	3	2	0	0	0	1	1	1	2	1	2	7	0	2	2	1	0	0	2	1	1	0	1	1	0	1	0	1	0	0	1	3	1	0	0	2	0	0	1	1	1	1	0	0	0	0	4	2
OCPFDLNE_00091	5	5	7	4	0	5	5	4	7	3	3	8	11	12	2	7	5	8	0	3	2	6	5	1	8	6	2	4	5	2	3	10	2	2	4	3	5	6	6	4	8	0	7	6	2	4	5	3	1
OCPFDLNE_00092	10	6	9	3	8	15	5	4	9	1	5	10	17	6	7	11	9	6	4	8	4	10	11	12	15	8	5	18	20	12	5	11	21	10	8	9	8	15	9	10	7	17	13	15	3	5	8	12	13
OCPFDLNE_00093	0	0	0	0	0	0	0	0	0	0	0	0	0	0	0	0	0	0	0	0	0	0	1	0	0	0	0	0	0	0	0	0	0	0	0	0	0	0	0	0	0	0	0	0	0	0	0	0	0
OCPFDLNE_00094	0	4	1	2	1	0	0	2	1	0	0	0	21	2	1	2	0	0	0	1	2	1	4	0	0	0	1	1	4	4	1	0	1	0	0	0	0	1	0	0	1	0	0	4	1	2	0	4	0
OCPFDLNE_00095	0	1	0	0	0	1	1	0	0	1	0	0	5	1	0	0	3	0	2	0	1	0	5	3	0	0	2	2	2	1	2	1	0	0	0	1	0	2	1	1	1	0	1	0	1	0	0	4	0
OCPFDLNE_00096	1	0	0	0	0	0	0	0	0	0	0	0	0	0	0	0	0	0	0	0	0	0	0	3	0	0	0	0	0	0	0	0	0	0	0	0	0	0	0	0	0	0	0	0	0	0	0	0	0
OCPFDLNE_00097	0	0	0	0	0	0	0	1	0	0	0	0	9	1	0	0	0	0	0	0	1	1	0	0	0	2	3	1	2	0	0	0	0	0	1	1	0	0	0	0	1	0	0	0	1	1	1	0	0
OCPFDLNE_00098	1	1	0	0	0	1	0	1	1	0	0	1	11	1	0	0	0	0	0	1	0	1	2	0	2	0	0	2	1	1	0	0	2	0	1	1	0	0	2	1	1	0	4	4	1	2	2	1	2
OCPFDLNE_00099	1	1	0	1	2	1	0	0	0	1	1	1	7	0	2	1	0	0	0	0	0	0	0	1	0	0	4	0	1	3	3	2	0	0	0	1	1	1	0	0	1	0	0	0	2	2	1	1	0
OCPFDLNE_00100	1	0	1	0	0	0	2	1	2	0	3	0	8	0	0	0	0	1	1	2	0	0	2	2	2	0	1	0	1	0	1	0	1	0	0	1	1	2	3	1	1	1	3	1	1	0	2	4	0
OCPFDLNE_00101	2	0	0	0	0	0	0	0	0	0	0	0	0	0	0	0	1	0	0	1	0	0	0	1	1	0	1	0	0	0	0	0	0	0	0	0	0	1	0	0	0	0	0	1	1	0	0	2	0
OCPFDLNE_00102	0	0	0	0	1	4	0	0	0	0	0	1	3	0	0	0	0	0	0	1	2	0	0	0	0	0	2	0	0	0	2	1	2	0	0	2	2	0	0	1	0	4	0	0	0	0	0	0	0
OCPFDLNE_00103	11	5	2	7	4	11	3	7	16	12	9	5	11	10	5	7	9	5	1	9	0	4	1	17	6	3	5	12	10	6	9	10	10	1	3	8	8	5	12	16	3	13	6	10	11	7	15	10	2
OCPFDLNE_00104	54	62	32	24	32	67	101	104	123	115	88	212	329	37	204	248	276	30	25	117	64	107	116	132	129	87	136	113	105	74	69	115	186	87	125	98	152	167	157	198	316	277	271	407	232	218	263	440	232
OCPFDLNE_00105	37	37	21	23	16	28	64	58	78	54	61	89	221	22	103	206	184	21	7	116	45	70	93	102	107	74	94	46	70	22	37	33	85	40	53	71	96	95	79	95	182	156	170	182	108	73	120	245	107
OCPFDLNE_00106	35	54	39	18	28	28	75	103	95	92	77	182	295	44	167	302	232	41	18	142	82	120	126	215	199	112	202	72	50	40	44	79	120	54	61	55	101	94	79	82	122	121	148	197	88	92	141	248	144
OCPFDLNE_00107	17	15	13	7	2	13	14	39	35	26	30	64	69	19	32	55	46	15	6	45	21	52	29	56	73	29	25	24	14	14	18	12	32	10	8	11	30	21	19	29	31	28	33	45	24	21	28	60	32
OCPFDLNE_00108	8	7	5	8	4	18	11	17	13	10	16	31	33	17	18	17	10	14	1	11	7	7	4	5	12	6	6	2	5	10	10	4	26	8	7	8	9	5	5	12	5	4	6	4	7	5	8	22	6
OCPFDLNE_00109	0	0	0	0	0	0	0	0	0	0	0	0	0	0	0	0	0	1	0	2	0	1	1	1	1	0	1	0	0	0	1	0	0	0	0	0	0	1	1	0	0	0	0	0	1	2	1	5	0
OCPFDLNE_00110	2	0	0	1	0	2	2	1	1	1	1	2	4	3	1	1	3	0	0	3	1	0	4	3	3	4	6	0	2	0	0	0	2	1	0	0	0	2	0	0	0	0	1	0	3	0	0	1	0
OCPFDLNE_00111	4	6	2	2	4	6	6	16	14	11	6	11	28	7	13	15	17	10	1	7	2	7	4	9	13	3	3	11	8	0	3	6	4	3	4	11	10	8	12	17	12	7	9	7	12	10	9	32	8
OCPFDLNE_00112	68	100	69	28	47	90	149	152	200	198	183	292	849	20	524	874	641	15	60	365	185	242	257	309	271	218	379	181	170	140	111	247	270	253	341	350	482	512	427	308	560	587	692	898	431	362	589	942	597
OCPFDLNE_00113	0	0	1	0	0	2	1	3	1	7	2	2	9	0	7	11	11	2	2	4	4	3	6	8	7	4	7	1	0	2	1	0	0	2	3	7	4	4	3	2	7	8	6	5	7	2	5	16	6
OCPFDLNE_00114	0	3	1	0	1	3	0	0	0	0	2	0	11	0	1	4	1	2	0	5	1	3	1	2	3	0	5	6	2	2	1	2	1	3	4	0	2	8	1	3	3	2	4	1	2	2	3	3	2
OCPFDLNE_00115	0	1	0	1	0	3	0	0	1	0	1	0	6	1	2	6	2	0	0	1	0	0	4	2	2	0	0	5	1	0	0	1	6	2	1	2	1	3	3	3	1	2	5	6	1	4	0	4	1
OCPFDLNE_00116	46	50	34	22	20	44	19	32	48	33	32	30	75	32	28	69	50	30	12	44	32	35	37	72	42	33	63	62	78	47	33	68	65	35	50	70	70	67	44	50	77	84	71	79	37	33	73	109	43
OCPFDLNE_00117	74	81	52	33	27	61	27	58	32	41	50	58	80	61	34	94	40	49	16	64	29	39	46	73	68	39	41	66	63	65	25	63	78	33	55	56	60	72	45	64	79	56	70	67	44	42	58	73	43
OCPFDLNE_00118	2	1	2	0	0	3	0	1	0	2	0	1	4	0	2	0	2	0	0	1	2	3	0	2	1	0	0	3	0	0	1	3	4	1	2	1	1	1	0	8	1	0	4	0	2	4	4	8	1
OCPFDLNE_00119	0	1	0	0	0	0	1	1	3	2	1	3	4	0	5	3	1	0	0	2	2	3	3	2	6	5	3	2	1	0	1	3	0	0	0	1	0	0	1	1	2	1	2	3	3	1	1	2	2
OCPFDLNE_00120	3	1	1	1	1	2	1	1	3	0	2	0	9	4	1	5	2	4	0	2	5	3	9	14	7	1	7	1	1	0	0	1	2	1	2	2	2	1	2	1	3	5	0	1	2	1	1	5	0
OCPFDLNE_00121	29	20	22	11	7	29	18	30	20	22	20	70	62	12	29	42	26	12	8	47	28	35	38	86	35	60	49	22	14	9	19	19	29	11	17	12	19	13	16	20	18	14	27	22	18	22	16	37	13
OCPFDLNE_00122	35	25	15	12	18	26	23	43	27	19	20	44	66	21	37	52	47	19	11	52	32	51	53	137	81	70	92	45	43	18	26	38	62	13	22	43	56	41	40	49	33	57	44	52	49	22	34	105	22
OCPFDLNE_00123	6	0	4	2	4	4	0	5	2	3	3	3	6	5	4	5	2	1	0	4	2	3	4	4	5	3	3	9	2	3	1	3	9	0	3	2	1	4	0	6	3	1	3	5	3	0	4	4	0
OCPFDLNE_00124	4	2	3	1	1	5	3	3	0	3	2	4	4	1	2	0	1	2	0	1	1	1	0	3	4	1	0	2	1	1	3	3	3	0	0	1	3	4	1	4	4	3	1	0	2	1	2	1	4
OCPFDLNE_00125	1	2	0	1	1	1	0	0	2	3	4	6	8	7	0	3	1	8	1	1	0	0	1	0	6	3	2	3	4	1	3	4	2	0	4	4	1	4	1	2	1	2	1	5	2	2	0	0	0
OCPFDLNE_00126	1	1	1	1	1	3	1	0	4	2	1	1	5	5	2	4	2	6	1	1	0	1	0	2	1	2	1	5	2	1	1	0	2	2	3	4	0	2	1	1	0	0	2	2	0	2	2	5	1
OCPFDLNE_00127	0	1	0	0	0	0	0	0	0	1	1	0	1	2	1	0	1	3	0	0	0	0	0	0	0	0	0	0	0	0	2	0	0	0	1	0	0	0	1	0	1	0	1	0	0	0	0	0	0
OCPFDLNE_00128	2	3	0	0	0	0	2	1	1	0	0	1	0	4	1	1	0	5	0	0	0	0	1	1	1	2	0	2	0	3	1	4	3	1	0	3	1	1	0	1	1	0	0	0	2	1	3	3	2
OCPFDLNE_00129	0	4	0	0	3	2	1	1	0	0	3	4	18	12	0	7	3	5	0	1	1	1	1	6	8	3	4	4	3	2	2	5	1	3	2	2	1	1	3	3	1	4	5	3	3	6	3	2	3
OCPFDLNE_00130	1	0	1	1	0	0	0	0	1	2	0	3	8	7	2	0	0	3	0	1	0	0	2	2	0	0	1	0	1	1	1	1	0	1	0	1	1	1	4	6	1	0	1	2	0	0	1	2	2
OCPFDLNE_00131	0	0	0	1	1	5	2	2	3	1	0	1	6	10	5	3	3	8	2	4	0	2	1	11	7	3	8	1	6	4	1	3	8	2	2	6	3	4	1	1	1	5	4	1	2	1	1	2	2
OCPFDLNE_00132	2	3	4	0	0	1	3	0	0	0	1	1	6	7	0	0	1	5	1	2	0	1	0	1	1	3	1	0	2	0	0	1	5	1	1	1	1	0	0	0	1	0	0	1	1	1	0	0	0
OCPFDLNE_00133	1	1	1	0	0	1	0	0	1	0	2	0	5	2	0	0	0	5	0	1	0	0	0	1	2	0	2	3	3	1	1	2	6	0	0	1	3	3	1	0	2	0	2	1	1	1	2	0	0
OCPFDLNE_00134	1	1	0	2	0	0	1	1	0	0	0	3	1	5	1	1	1	5	0	1	0	1	1	2	4	2	3	1	0	1	0	1	0	0	2	1	1	3	4	1	0	2	0	1	5	0	2	3	1
OCPFDLNE_00135	0	3	0	0	0	1	1	0	1	0	1	2	7	0	0	2	0	0	0	0	1	1	0	3	0	1	1	0	0	0	0	1	0	0	0	1	1	4	1	1	0	2	3	0	1	0	1	0	1
OCPFDLNE_00136	0	0	1	0	0	0	0	0	0	0	0	0	0	2	0	1	0	2	0	1	0	0	0	0	2	0	0	0	1	0	0	1	0	0	0	0	0	0	0	1	0	0	1	0	0	0	0	0	1
OCPFDLNE_00137	2	1	0	1	0	1	0	2	4	2	0	0	6	2	1	2	0	2	1	2	0	2	0	3	2	0	2	1	1	0	0	4	1	0	2	1	0	2	2	1	4	2	2	0	0	0	1	3	0
OCPFDLNE_00138	42	70	65	25	44	63	43	97	82	85	106	124	161	152	104	176	111	130	20	84	37	92	68	132	118	120	103	118	151	89	78	121	132	96	112	107	116	139	118	176	167	155	203	184	144	124	175	257	132
OCPFDLNE_00139	158	107	80	77	72	119	72	77	100	77	69	131	126	99	68	108	90	72	23	93	64	59	61	153	135	77	80	146	155	72	121	110	175	39	83	131	119	82	81	117	100	72	105	91	85	64	102	267	75
OCPFDLNE_00140	16	12	12	1	7	14	15	21	30	18	20	32	42	21	14	49	32	11	3	57	14	34	31	53	51	28	50	23	15	16	10	15	19	18	25	17	27	19	22	31	26	31	29	40	18	29	25	64	17
OCPFDLNE_00141	306	143	178	158	176	345	182	207	283	261	216	294	331	86	260	105	176	50	50	302	166	191	172	213	214	182	198	397	493	254	338	355	508	194	303	475	341	312	293	459	402	339	442	381	330	194	345	462	253
OCPFDLNE_00142	188	95	118	100	94	333	105	161	236	248	158	240	227	18	214	97	122	17	51	169	187	155	118	122	74	96	132	169	204	162	266	201	178	117	166	231	205	151	149	297	177	169	232	179	152	136	266	286	149
OCPFDLNE_00143	8	14	5	4	2	7	12	12	15	20	14	19	18	9	16	23	13	7	9	20	12	23	22	24	36	15	30	11	22	8	17	22	22	5	7	26	21	18	15	20	23	17	20	16	16	12	22	44	16
OCPFDLNE_00144	3	5	3	2	1	2	4	2	7	5	5	4	12	0	3	8	6	2	1	12	2	2	8	9	13	3	8	5	1	2	3	3	10	2	2	2	2	5	4	3	5	7	0	6	5	2	5	13	5
OCPFDLNE_00145	3	5	3	0	2	2	4	3	4	3	4	7	14	3	4	6	4	4	0	2	1	4	2	8	11	5	6	8	5	1	5	10	11	1	3	2	8	3	3	3	1	5	10	3	5	8	3	7	2
OCPFDLNE_00146	0	0	1	2	2	2	4	1	0	1	0	0	4	3	0	3	1	2	1	1	1	0	3	6	2	1	0	9	5	3	4	5	10	0	6	5	7	9	3	8	7	3	10	6	6	5	10	16	4
OCPFDLNE_00147	1	3	2	0	3	4	0	2	1	2	2	0	4	0	3	4	4	1	0	1	0	2	3	1	1	2	0	3	2	1	4	6	8	3	8	0	8	1	6	9	9	12	10	4	5	7	8	14	6
OCPFDLNE_00148	20	11	15	5	4	7	10	19	29	12	12	20	51	5	16	31	27	6	2	16	18	19	18	41	29	19	24	21	21	10	23	21	24	14	17	22	27	15	20	41	21	33	36	36	26	21	23	62	28
OCPFDLNE_00149	13	5	4	6	6	9	8	12	14	9	2	21	19	0	11	8	5	1	3	4	6	8	7	13	10	5	17	10	22	11	12	13	6	2	7	22	18	10	16	10	9	7	14	5	11	12	11	19	9
OCPFDLNE_00150	1	0	2	4	0	2	0	3	4	3	1	3	2	0	1	3	5	0	0	2	2	1	2	4	1	3	1	6	0	1	1	0	0	0	3	1	1	1	1	1	3	4	0	5	3	1	2	5	1
OCPFDLNE_00151	2	0	1	0	0	2	1	0	0	0	0	1	2	0	3	1	2	0	0	0	1	0	1	0	0	1	2	0	2	0	0	0	1	0	0	0	0	2	2	0	0	0	0	1	0	0	1	1	0
OCPFDLNE_00152	5	3	6	0	5	5	4	10	6	9	3	9	13	2	14	9	6	2	4	8	11	2	4	4	8	5	2	4	5	4	8	5	3	3	7	6	5	3	4	10	3	6	14	6	10	8	11	15	3
OCPFDLNE_00153	2	3	0	0	1	4	1	1	5	4	0	2	6	5	2	1	1	2	0	3	2	3	1	4	1	1	3	4	2	0	2	5	0	2	0	7	6	1	2	1	1	4	2	6	2	1	1	3	0
OCPFDLNE_00154	8	5	5	5	8	7	2	11	17	7	6	14	11	0	7	11	6	0	2	7	10	4	2	6	7	5	11	9	8	3	6	7	2	3	8	18	9	7	13	13	9	10	16	15	4	4	7	25	7
OCPFDLNE_00155	3	0	1	1	0	3	1	2	2	3	1	3	6	0	3	4	7	0	0	3	0	0	0	4	2	1	1	2	0	0	4	3	6	2	1	2	4	1	1	5	3	3	0	5	3	2	2	5	2
OCPFDLNE_00156	3	1	1	1	0	3	0	3	1	1	0	3	4	0	1	2	2	0	2	1	1	1	0	4	1	0	1	3	2	3	2	1	1	0	1	1	2	4	3	2	2	3	1	3	0	2	1	2	0
OCPFDLNE_00157	9	5	2	6	4	4	2	7	19	4	18	7	12	2	6	20	9	1	3	20	4	18	16	14	34	12	17	10	8	3	4	2	8	2	2	8	11	4	5	5	3	5	4	10	2	6	5	26	4
OCPFDLNE_00158	2	9	1	3	1	7	0	2	4	4	1	4	8	5	3	3	3	1	0	4	3	3	1	6	9	4	4	6	6	1	0	9	2	2	2	5	4	3	5	5	4	5	1	2	4	0	2	9	1
OCPFDLNE_00159	0	1	0	0	0	0	0	0	0	0	0	0	6	0	0	0	0	0	0	1	0	0	0	0	0	0	0	0	0	0	0	0	3	0	0	0	0	0	0	1	0	1	1	0	0	0	0	1	1
OCPFDLNE_00160	0	0	0	0	0	0	0	0	1	0	0	0	1	1	0	0	0	1	1	0	1	0	0	1	1	1	0	0	0	0	0	0	0	0	0	0	0	0	0	0	0	1	0	0	0	0	0	0	0
OCPFDLNE_00161	0	0	0	0	0	0	0	0	0	0	0	0	0	0	0	0	0	0	0	0	0	0	0	0	0	0	0	0	0	0	0	0	0	0	0	0	0	0	0	0	0	0	1	0	0	0	0	1	0
OCPFDLNE_00162	20	20	17	7	8	16	7	20	26	15	26	33	42	8	19	26	14	5	8	44	19	29	35	71	44	35	46	33	24	21	12	17	50	12	22	15	24	23	16	15	16	18	20	32	23	6	15	38	17
OCPFDLNE_00163	7	6	3	1	4	8	5	10	9	9	6	17	16	10	10	20	5	8	8	25	14	14	13	40	21	11	21	8	7	8	2	9	16	1	11	10	4	7	8	13	12	13	5	8	5	7	12	30	5
OCPFDLNE_00164	0	0	0	0	1	0	0	2	0	0	0	0	6	0	0	0	1	0	0	0	0	0	2	4	0	0	4	0	0	0	0	0	0	0	1	0	0	1	1	0	2	0	2	1	0	0	0	4	0
OCPFDLNE_00165	3	3	4	3	1	1	5	3	3	4	6	4	14	2	2	2	3	2	0	6	0	5	6	9	9	8	10	1	1	2	5	6	10	4	7	5	6	7	4	8	10	3	3	8	11	4	3	6	5
OCPFDLNE_00166	19	17	6	6	8	22	22	19	18	24	19	41	54	23	19	34	37	9	7	25	29	37	42	64	60	49	67	17	23	4	13	14	23	14	8	16	15	10	12	26	20	26	25	29	28	13	16	40	16
OCPFDLNE_00167	47	55	31	24	34	59	68	65	77	60	74	104	191	79	93	157	144	62	21	127	66	76	124	193	143	83	159	88	91	56	41	121	105	55	70	92	120	110	100	117	129	167	117	196	144	58	105	292	74
OCPFDLNE_00168	14	38	27	6	11	28	23	36	27	33	51	71	86	47	40	93	71	24	6	41	42	59	62	149	121	44	121	54	52	34	26	62	77	38	29	39	57	63	63	46	76	55	45	72	44	43	29	92	36
OCPFDLNE_00169	17	25	15	7	9	14	15	32	25	16	29	43	55	31	28	63	31	31	6	36	18	28	29	51	36	31	45	32	17	13	16	16	30	17	17	16	24	24	24	22	26	25	23	31	15	17	16	47	21
OCPFDLNE_00170	2	4	4	4	4	2	4	5	8	5	4	10	12	6	10	18	13	5	3	19	12	10	20	47	18	11	29	11	7	7	1	8	12	3	10	5	11	6	5	8	9	12	9	11	9	1	10	20	9
OCPFDLNE_00171	0	0	2	1	2	3	2	4	4	1	2	5	3	3	5	10	7	3	3	3	4	6	3	23	11	8	9	3	5	3	1	3	2	3	4	1	3	4	3	4	4	2	3	4	5	2	3	2	2
OCPFDLNE_00172	5	6	4	2	3	10	5	13	13	6	12	14	23	18	6	21	19	17	5	11	13	15	29	43	23	14	32	4	6	4	9	6	10	7	3	3	12	19	7	0	9	9	13	15	4	2	8	15	5
OCPFDLNE_00173	0	0	0	0	0	3	0	2	4	2	0	2	1	0	0	0	1	1	0	1	0	0	0	2	2	0	2	0	0	0	1	0	0	0	0	1	0	0	0	0	2	0	0	2	1	2	1	2	0
OCPFDLNE_00174	51	43	31	18	23	61	52	49	36	50	30	90	87	5	38	37	31	1	3	39	13	28	18	33	36	15	35	75	38	24	40	52	88	29	41	57	54	49	46	76	64	77	81	73	105	58	71	108	41
OCPFDLNE_00175	328	278	184	114	137	250	201	294	281	189	170	438	466	26	251	275	278	21	33	235	128	256	194	320	280	179	235	431	424	226	267	354	457	220	287	405	349	319	294	526	484	472	507	529	428	262	422	764	296
OCPFDLNE_00176	16	15	7	3	0	11	6	16	16	7	9	28	26	0	10	19	9	0	2	23	10	15	21	28	27	20	25	22	14	10	9	12	13	7	14	20	20	19	12	27	22	21	14	28	19	7	25	34	7
OCPFDLNE_00177	1	6	1	0	2	3	1	2	1	1	2	5	2	0	2	1	3	0	1	1	0	2	3	2	3	0	0	2	3	2	2	2	6	2	3	3	1	0	2	4	2	1	1	0	1	2	0	6	0
OCPFDLNE_00178	3	2	7	1	0	1	0	4	0	1	0	5	0	0	2	1	0	0	0	0	0	1	1	0	1	1	0	4	3	1	1	4	7	0	1	1	4	2	0	1	2	0	2	5	1	1	1	2	0
OCPFDLNE_00179	2	2	2	0	0	0	1	0	2	2	3	2	16	1	1	3	3	0	1	2	1	2	1	2	1	2	1	0	0	0	3	3	2	0	0	3	3	3	2	3	1	2	1	2	3	4	4	3	0
OCPFDLNE_00180	1	0	0	1	0	1	10	4	8	4	4	9	19	0	6	7	4	1	1	5	3	11	10	17	23	18	23	3	3	0	6	1	2	1	0	1	3	0	4	7	7	3	4	5	5	0	5	7	3
OCPFDLNE_00181	15	16	9	7	7	12	12	19	38	26	32	55	70	19	23	43	41	12	6	43	35	33	45	80	53	40	81	20	27	11	14	25	27	6	17	24	20	16	14	33	21	28	29	20	21	19	25	62	12
OCPFDLNE_00182	3	4	2	0	2	3	9	21	31	5	22	21	30	2	6	20	16	5	17	36	27	36	49	96	106	69	72	11	3	0	6	7	2	0	7	3	7	2	3	10	10	6	6	8	9	3	9	19	5
OCPFDLNE_00183	0	0	2	0	0	0	1	5	3	1	10	1	11	0	1	3	4	0	4	7	5	11	5	23	21	17	9	1	3	1	0	1	0	0	1	0	2	0	3	2	2	0	0	4	2	1	2	8	1
OCPFDLNE_00184	1	0	0	0	0	2	0	3	3	0	3	0	10	0	3	2	1	1	5	3	8	2	5	16	11	7	13	0	2	3	0	0	3	1	1	0	0	0	1	6	2	0	4	4	2	3	1	1	1
OCPFDLNE_00185	1	5	0	2	1	5	1	4	3	5	4	1	15	1	4	6	3	1	5	7	4	5	8	28	17	17	25	4	0	2	6	4	8	3	1	3	4	4	1	2	6	6	8	6	2	3	5	3	2
OCPFDLNE_00186	5	1	2	1	1	0	2	8	3	1	3	3	21	0	5	7	5	0	6	3	10	4	4	15	8	8	21	2	3	3	4	4	3	1	0	2	1	3	0	2	3	2	6	3	4	1	3	17	2
OCPFDLNE_00187	0	4	2	1	2	2	1	2	5	2	1	5	11	0	2	12	7	2	6	6	1	4	5	17	4	6	10	1	4	0	4	11	16	3	1	3	3	5	7	7	5	6	6	5	8	5	6	13	1
OCPFDLNE_00188	12	8	4	1	7	5	9	10	9	6	8	14	25	0	10	24	11	0	10	12	13	15	8	44	27	10	28	9	13	4	9	9	11	2	13	11	9	12	11	10	19	17	12	11	22	2	10	19	18
OCPFDLNE_00189	1	3	0	1	2	2	7	2	3	2	5	10	8	4	8	9	9	7	1	10	4	5	5	12	12	5	13	2	5	0	1	4	3	2	1	6	7	3	2	5	5	5	3	11	5	4	5	17	1
OCPFDLNE_00190	14	30	14	3	9	20	25	33	25	21	20	52	90	22	35	60	52	12	8	35	17	46	36	24	64	17	36	31	15	16	20	28	17	13	11	18	27	18	24	24	50	33	29	51	35	29	21	125	33
OCPFDLNE_00191	1	0	1	1	2	5	3	8	8	7	4	6	9	4	9	7	3	0	3	2	10	6	6	18	5	4	15	4	1	2	0	4	3	1	4	5	7	4	1	1	5	3	3	4	10	3	8	9	2
OCPFDLNE_00192	34	34	19	9	11	56	33	39	57	43	47	102	78	9	52	80	55	2	22	56	37	62	53	110	82	50	66	47	45	29	41	31	46	18	33	43	44	23	55	63	40	35	32	53	59	32	30	100	43
OCPFDLNE_00193	2026	1140	1003	738	1013	2965	1164	2081	3034	2266	1332	2907	3734	2297	2727	1814	2011	1915	268	1554	1348	529	441	1126	899	574	497	1659	926	648	1362	845	1531	550	549	1101	1650	826	1052	1147	662	910	716	964	998	676	729	2756	869
OCPFDLNE_00194	12	5	8	2	8	6	15	25	34	25	18	31	47	41	28	52	41	30	8	37	17	22	33	47	61	32	51	12	14	16	9	17	21	23	18	19	15	18	28	22	43	28	25	55	31	17	37	44	26
OCPFDLNE_00195	45	31	26	21	17	34	20	49	66	39	55	52	103	35	56	103	75	39	24	86	48	57	68	87	92	61	72	44	49	31	27	39	70	38	40	46	57	54	39	63	42	50	63	85	49	52	55	121	50
OCPFDLNE_00196	29	21	10	10	16	23	39	81	77	45	57	101	89	47	44	92	53	32	29	105	61	79	90	164	212	85	120	31	24	7	19	24	63	17	16	19	17	19	23	35	37	36	21	43	52	9	25	115	31
OCPFDLNE_00197	6	2	0	3	2	7	3	7	13	14	4	17	15	14	7	18	9	3	2	23	8	7	30	37	18	23	39	4	6	3	1	4	20	1	6	2	2	4	4	16	16	16	7	12	34	8	12	13	7
OCPFDLNE_00198	1	1	0	0	0	0	0	2	4	5	4	3	9	3	3	6	2	2	0	7	3	6	7	5	8	10	17	2	0	1	2	2	3	4	1	1	2	3	1	1	1	2	6	3	1	2	1	2	1
OCPFDLNE_00199	7	3	5	3	6	10	11	10	17	12	9	20	24	15	5	23	16	8	1	19	19	15	21	53	30	16	48	6	10	6	5	5	17	7	11	10	6	6	5	8	5	12	11	14	8	12	10	18	1
OCPFDLNE_00200	150	125	86	55	79	179	112	160	199	218	183	251	287	170	175	174	187	145	59	209	147	197	167	212	327	202	208	156	168	94	144	148	246	83	91	133	149	119	140	226	158	184	158	168	197	110	185	312	115
OCPFDLNE_00201	59	51	38	21	40	66	53	106	84	80	74	127	122	50	55	57	49	38	17	72	52	62	29	66	95	62	66	39	48	43	30	49	82	31	31	34	39	30	39	56	42	42	48	61	42	46	46	101	33
OCPFDLNE_00202	201	185	121	100	94	272	141	131	91	168	92	262	212	108	127	180	143	80	14	188	97	168	101	197	185	117	216	318	311	207	177	247	435	159	188	242	208	231	190	282	239	238	220	230	222	176	201	348	144
OCPFDLNE_00203	61	57	44	17	27	75	49	57	39	47	38	83	146	135	51	101	73	92	8	62	29	76	38	92	89	34	99	57	51	40	19	43	72	28	41	43	66	50	32	63	50	60	46	85	44	37	42	75	42
OCPFDLNE_00204	166	152	86	99	81	164	94	118	106	91	82	235	183	26	78	110	107	33	4	63	46	57	57	75	63	31	43	216	233	92	124	153	333	67	97	199	145	126	133	229	189	180	175	165	194	95	152	304	106
OCPFDLNE_00205	1	1	1	0	3	0	2	4	2	3	3	3	18	575	2	8	5	426	1	5	3	5	2	12	6	2	8	4	2	0	5	2	4	5	4	4	2	4	4	4	11	9	10	2	4	6	2	3	6
OCPFDLNE_00206	36	44	26	14	26	58	31	56	42	36	27	81	76	11346	47	68	49	9296	18	35	42	27	21	55	36	31	37	33	56	32	29	37	60	28	26	44	39	34	27	59	63	65	49	45	43	33	50	98	36
OCPFDLNE_00207	2	1	1	2	0	0	0	7	0	0	0	1	9	36	2	2	1	26	1	3	0	3	2	0	6	5	5	0	1	1	0	3	0	1	1	2	0	0	5	1	0	1	4	0	1	1	0	1	3
OCPFDLNE_00208	2	0	1	1	1	0	2	1	4	6	1	4	18	85	5	7	7	69	3	10	1	1	9	7	4	6	4	1	1	5	3	4	0	1	4	2	3	1	2	2	2	3	7	4	2	4	1	2	2
OCPFDLNE_00209	1	0	1	0	0	0	2	2	0	3	2	0	7	48	2	2	2	37	0	1	2	0	3	1	3	0	2	0	0	0	2	0	1	1	0	2	1	2	1	0	2	1	0	1	1	0	1	1	1
OCPFDLNE_00210	1	0	0	0	0	0	2	0	0	0	0	0	1	1	0	1	0	0	0	0	0	0	2	1	0	0	0	0	0	0	2	0	0	0	0	0	0	0	0	0	2	2	0	1	0	0	0	3	0
OCPFDLNE_00211	1	1	0	0	0	1	1	1	0	1	0	0	3	0	1	1	0	0	0	1	0	0	0	1	2	1	2	0	0	1	0	0	1	0	0	0	1	0	0	0	0	0	0	1	0	1	0	3	1
OCPFDLNE_00212	21	12	12	9	9	28	18	14	9	21	18	36	32	8	23	35	27	8	6	15	12	17	13	17	12	17	18	16	10	5	8	20	9	13	12	15	23	8	11	14	22	10	17	19	17	9	20	29	19
OCPFDLNE_00213	37	37	21	12	18	38	22	39	26	33	21	54	50	22	27	57	34	19	4	37	25	41	30	70	46	31	50	49	41	29	20	39	64	21	34	37	38	48	33	40	46	64	46	62	35	19	41	98	34
OCPFDLNE_00214	1341	1131	745	497	469	1225	631	862	642	663	594	1328	1398	576	594	873	708	411	112	969	384	881	681	1092	1078	657	918	1573	1364	851	722	1362	2078	680	896	1132	1239	1128	910	1452	1457	1397	1205	1520	1087	706	948	1616	750
OCPFDLNE_00215	597	540	445	294	370	620	483	579	657	577	499	798	873	406	489	723	597	318	58	603	295	344	338	451	545	281	387	831	725	440	365	734	788	431	563	465	705	744	473	725	814	815	822	835	626	529	665	938	499
OCPFDLNE_00216	13	9	5	2	1	8	9	12	11	14	12	18	23	6	10	24	19	7	1	16	4	9	6	7	29	6	9	10	11	3	7	10	14	4	3	9	13	13	7	15	21	19	14	20	16	13	15	32	9
OCPFDLNE_00217	12	6	6	5	6	13	10	18	13	8	16	22	45	18	21	26	16	4	3	24	16	18	13	26	19	9	12	13	3	2	4	3	27	7	8	3	8	4	12	11	17	6	5	12	13	10	13	38	2
OCPFDLNE_00218	10	9	13	11	10	15	19	24	19	13	25	30	58	14	26	40	23	6	13	27	17	26	24	39	37	35	36	15	27	17	15	18	29	13	15	13	25	21	25	16	18	20	19	17	15	7	16	37	21
OCPFDLNE_00219	10	13	9	2	15	13	12	24	17	13	10	25	41	3	7	23	18	5	2	14	11	19	25	40	35	25	28	26	27	6	16	15	28	9	13	16	17	13	13	18	10	15	13	19	16	17	20	37	8
OCPFDLNE_00220	14	4	7	3	7	16	9	13	12	15	20	39	18	11	10	15	10	10	4	15	9	6	9	20	14	18	10	13	10	8	12	9	11	9	10	13	16	15	14	11	15	16	11	15	15	8	13	22	15
OCPFDLNE_00221	18	16	12	8	15	32	49	74	107	74	64	132	107	15	58	69	86	7	18	101	61	60	84	130	197	87	147	46	52	33	28	34	74	23	20	54	50	42	43	86	77	85	56	62	139	49	54	183	51
OCPFDLNE_00222	22	23	12	20	29	29	44	77	99	70	87	152	133	36	61	89	100	31	12	83	48	80	60	77	146	59	70	16	15	9	17	19	41	14	24	37	24	17	26	32	38	48	30	41	53	23	33	137	33
OCPFDLNE_00223	31	23	32	23	14	20	34	54	47	46	54	83	125	26	76	94	81	18	11	93	44	74	93	121	105	64	106	53	45	30	36	44	48	27	45	50	52	61	48	84	79	89	82	93	78	49	78	183	66
OCPFDLNE_00224	163	160	122	72	77	160	121	199	177	180	192	272	320	153	182	365	225	89	48	293	155	241	234	362	395	200	383	222	199	144	121	223	308	138	163	152	222	199	192	191	218	192	222	281	192	185	220	378	171
OCPFDLNE_00225	8	8	7	3	6	11	12	15	10	11	18	24	20	14	11	30	26	11	6	29	8	36	29	44	45	33	42	23	7	11	7	9	21	7	17	9	24	12	13	14	18	15	28	19	19	16	24	33	16
OCPFDLNE_00226	8	9	5	1	3	13	5	7	11	7	10	13	23	3	12	24	24	2	4	32	17	10	23	18	40	8	24	14	10	7	8	18	10	7	7	11	7	10	16	8	13	7	13	12	18	9	19	26	9
OCPFDLNE_00227	22	28	8	6	10	29	26	33	36	24	39	39	70	52	41	77	53	48	10	90	40	66	57	76	88	49	41	24	25	15	11	26	38	11	18	18	24	30	23	27	30	26	25	35	31	22	39	78	23
OCPFDLNE_00228	18	26	12	12	17	24	13	15	18	18	23	20	39	2	15	35	15	4	7	20	13	23	14	32	32	17	25	21	18	11	11	25	23	12	16	15	28	14	11	17	13	19	22	20	20	18	16	29	17
OCPFDLNE_00229	4	13	7	5	5	6	5	15	8	3	7	11	12	3	9	12	2	2	5	9	5	9	7	16	7	12	19	10	16	4	3	16	18	7	11	5	10	7	9	13	7	17	10	9	5	2	11	14	8
OCPFDLNE_00230	18	10	7	4	8	12	8	10	4	5	7	16	17	1	7	8	9	3	6	9	7	16	8	26	21	19	15	12	13	12	11	5	17	6	10	6	14	11	10	11	6	13	12	10	6	6	11	17	8
OCPFDLNE_00231	34	24	21	7	15	28	14	18	26	14	22	33	42	27	16	46	30	9	12	51	16	41	24	78	52	39	47	44	42	26	18	23	77	19	21	17	24	24	33	31	28	30	28	34	17	14	27	51	20
OCPFDLNE_00232	45	31	24	18	9	51	38	63	64	68	71	95	124	19	60	129	71	12	18	78	65	87	77	194	133	89	147	45	35	17	31	41	73	29	30	22	63	38	44	45	51	49	46	73	54	33	39	142	33
OCPFDLNE_00248	10	3	3	4	6	17	9	29	62	27	42	32	36	46	33	32	19	24	20	61	45	34	49	58	54	48	25	6	15	7	7	14	20	14	8	15	15	7	11	24	14	24	17	27	16	5	11	22	10
OCPFDLNE_00249	22	19	14	9	6	21	28	52	77	35	83	72	74	65	48	77	43	29	23	130	72	88	86	116	146	84	108	23	21	17	17	24	41	12	21	27	28	30	29	38	37	41	37	47	34	29	34	50	14
OCPFDLNE_00250	57	44	43	16	28	56	49	83	109	66	123	71	96	117	81	89	85	51	81	201	162	180	217	295	233	184	242	60	84	37	49	69	100	40	62	73	69	54	59	71	86	94	94	94	83	54	81	125	64
OCPFDLNE_00251	298	279	202	152	123	310	191	272	294	218	263	400	416	242	250	389	255	173	181	657	375	427	528	1075	731	492	906	348	337	217	199	306	517	178	254	250	262	325	241	316	366	326	324	394	267	218	288	545	240
OCPFDLNE_00252	28	43	18	6	13	39	24	43	43	31	32	62	60	14	37	77	40	12	19	73	42	52	79	143	96	80	111	46	36	25	20	39	54	22	21	25	39	43	26	48	34	56	42	67	30	27	37	93	36
OCPFDLNE_00253	42	54	25	15	20	47	49	61	75	52	61	82	98	92	48	131	88	76	23	92	70	72	137	302	163	118	241	72	58	53	41	88	92	32	43	54	71	66	55	78	85	64	96	77	65	53	72	145	40
OCPFDLNE_00254	25	33	28	14	10	27	24	31	41	36	26	44	83	31	31	46	37	19	15	51	28	43	42	116	70	64	94	29	27	20	24	29	78	29	18	33	29	27	27	30	31	26	34	34	29	25	28	61	31
OCPFDLNE_00255	22	22	21	13	8	23	25	38	23	31	32	38	65	29	20	56	43	16	10	53	39	44	49	135	85	55	106	36	20	33	27	40	45	21	31	18	48	26	36	34	37	40	43	50	40	25	38	78	36
OCPFDLNE_00256	76	88	40	17	35	82	67	96	101	77	93	151	158	34	78	98	111	29	39	130	84	119	134	278	197	126	278	104	78	52	61	77	157	47	71	72	113	79	97	82	98	100	90	121	75	42	78	220	62
OCPFDLNE_00257	1	0	1	1	0	0	1	4	1	4	3	1	7	3	1	5	3	1	3	12	1	8	8	11	9	7	10	3	1	0	3	2	4	1	3	6	0	2	3	2	5	3	2	5	5	5	2	5	1
OCPFDLNE_00258	6	8	3	2	1	3	6	8	14	8	10	9	22	10	12	24	13	5	5	28	10	13	24	55	30	27	31	10	4	7	3	13	5	8	6	8	9	3	11	8	11	7	9	13	7	6	14	18	5
OCPFDLNE_00259	4	4	2	2	6	4	3	3	4	1	5	6	8	5	5	7	3	1	4	9	10	8	16	17	13	6	8	8	2	3	0	2	1	1	1	3	5	3	2	3	6	8	1	3	3	0	1	5	3
OCPFDLNE_00260	2	3	3	0	5	8	7	3	3	7	8	6	9	3	2	14	3	0	3	16	12	18	16	29	20	12	27	6	6	4	1	5	6	3	4	4	7	11	10	6	7	3	1	3	6	7	10	6	4
OCPFDLNE_00261	9	6	5	1	5	7	7	7	7	9	10	3	13	0	6	5	8	0	8	13	14	12	21	20	22	16	20	11	3	2	5	7	9	1	8	8	7	7	6	11	9	8	5	8	4	7	5	14	4
OCPFDLNE_00262	7	9	6	1	2	2	8	3	7	8	10	11	16	1	11	26	22	3	2	27	9	9	19	31	21	30	22	6	7	8	7	9	23	7	6	11	8	11	7	10	18	10	11	14	8	6	18	20	12
OCPFDLNE_00263	1	1	3	2	2	3	9	16	11	6	8	30	23	9	13	12	10	5	1	7	6	7	5	9	15	7	11	5	2	0	2	1	6	0	2	3	9	5	3	10	3	7	7	4	10	6	5	25	3
OCPFDLNE_00264	6	5	2	2	1	7	9	26	14	23	7	24	45	7	17	16	17	9	0	17	9	7	7	5	16	4	7	9	6	10	8	3	15	5	5	3	9	7	9	5	6	7	6	16	14	5	7	41	9
OCPFDLNE_00265	1	0	0	0	0	1	1	3	2	3	1	1	6	0	1	4	0	0	0	1	0	5	2	0	2	3	0	0	2	0	0	0	1	2	2	0	0	0	0	3	1	1	3	4	2	0	1	3	3
OCPFDLNE_00266	44	41	24	17	22	60	43	86	79	58	72	83	171	32	89	142	103	22	12	66	55	54	57	105	93	67	102	62	47	19	46	54	101	39	38	55	70	62	34	61	73	64	51	102	70	59	58	192	63
OCPFDLNE_00267	45	60	30	16	27	54	55	74	67	41	52	96	168	28	53	136	100	19	13	61	43	54	48	108	102	54	102	58	47	28	17	44	73	34	40	28	51	55	48	42	53	56	42	73	57	32	40	132	35
OCPFDLNE_00268	55	49	31	17	21	51	34	61	65	51	60	101	121	28	49	115	61	24	4	47	31	62	32	116	63	33	64	68	45	34	25	49	102	32	39	32	62	39	50	48	44	57	47	68	41	33	36	129	39
OCPFDLNE_00269	28	14	9	7	12	15	33	29	27	23	35	32	60	7	16	43	23	5	4	26	10	14	4	29	15	14	24	23	9	16	8	18	21	6	15	15	13	12	14	17	13	14	14	15	14	8	10	30	9
OCPFDLNE_00270	0	0	0	0	0	1	0	0	0	1	0	0	2	0	0	1	0	0	0	0	1	0	0	1	0	0	0	1	0	0	0	0	3	1	0	0	0	0	0	0	0	0	0	0	0	0	0	0	0
OCPFDLNE_00271	12	8	5	9	10	12	11	18	26	11	13	35	27	5	17	20	12	3	1	25	14	24	14	27	50	27	19	12	17	4	9	12	12	1	1	19	17	12	21	19	14	15	26	27	27	7	17	42	9
OCPFDLNE_00272	13	6	11	3	3	6	4	11	6	5	6	14	13	14	8	6	5	4	1	5	6	7	10	16	10	10	14	9	9	4	11	9	10	3	12	8	4	6	2	5	3	12	10	5	1	4	6	8	4
OCPFDLNE_00273	21	19	10	10	9	18	14	22	29	20	15	36	65	21	23	37	35	14	4	30	18	23	13	41	44	26	28	33	19	10	21	24	25	10	13	25	19	21	21	25	18	35	20	28	27	22	19	96	29
OCPFDLNE_00274	0	0	0	0	0	1	0	0	2	0	1	3	10	3	0	1	6	1	0	0	1	4	2	3	3	2	6	4	0	0	0	0	0	1	1	2	0	2	2	1	0	0	2	0	3	2	3	5	1
OCPFDLNE_00275	2	0	0	0	0	0	0	0	3	0	0	1	4	0	2	0	0	2	0	1	1	2	1	3	3	0	1	0	0	0	1	0	0	0	0	2	2	1	1	1	0	2	0	3	0	0	2	0	0
OCPFDLNE_00276	1	0	0	0	0	0	0	0	0	1	0	0	7	1	1	0	0	0	0	5	1	0	2	1	0	1	4	0	1	1	0	0	0	0	1	0	1	2	0	3	1	3	3	0	1	1	0	1	2
OCPFDLNE_00277	3	2	1	0	2	4	0	0	3	0	0	1	3	2	4	4	1	1	0	2	5	1	0	3	1	3	6	3	3	0	2	0	1	1	0	1	4	2	1	5	1	5	4	3	3	2	3	3	2
OCPFDLNE_00278	3	2	0	0	0	1	3	3	3	3	1	2	9	1	1	3	1	0	0	2	2	1	2	9	1	3	5	6	0	0	1	1	3	0	0	3	1	0	0	0	4	1	2	4	0	0	1	2	0
OCPFDLNE_00279	199	304	183	85	102	264	228	269	266	232	257	400	542	315	233	556	349	273	137	430	221	309	380	806	516	365	751	378	338	222	176	374	562	236	263	271	341	337	273	270	344	350	366	434	234	217	228	588	271
OCPFDLNE_00280	259	330	233	102	154	337	237	295	296	236	289	435	481	213	259	542	353	207	159	390	240	262	339	952	448	323	725	398	415	272	166	347	619	198	288	270	379	397	320	296	338	291	331	433	204	224	264	570	251
OCPFDLNE_00281	11	12	4	1	6	8	9	7	9	11	13	14	12	1	17	22	11	2	2	21	7	18	11	7	26	18	11	13	16	9	10	8	13	4	16	12	17	11	15	14	11	18	15	12	16	13	16	21	9
OCPFDLNE_00282	71	73	50	28	38	64	48	53	59	46	47	68	90	85	40	119	66	65	15	67	40	58	46	83	79	55	58	90	69	46	35	71	85	51	74	49	58	69	51	63	66	72	71	81	60	57	72	86	69
OCPFDLNE_00283	1	0	0	0	0	1	1	1	0	2	2	3	10	0	0	1	1	0	0	2	2	0	2	1	0	2	1	1	1	0	1	1	0	1	0	2	0	0	0	0	3	3	0	2	2	0	1	0	1
OCPFDLNE_00284	192	176	122	72	104	211	122	140	131	102	95	165	253	235	131	220	151	141	17	188	77	116	114	175	149	93	126	242	249	119	96	208	300	126	182	188	210	205	116	274	284	284	354	292	186	179	292	344	175
OCPFDLNE_00285	81	77	36	39	49	67	39	43	53	43	41	60	96	138	50	88	65	70	9	59	24	63	44	76	75	52	71	102	85	52	31	90	86	52	57	89	77	87	58	114	127	92	112	129	78	59	108	140	61
OCPFDLNE_00286	2	0	1	0	2	2	0	1	1	1	1	3	11	0	1	3	4	2	0	2	1	1	0	3	2	2	4	3	2	5	2	0	2	2	2	3	5	2	1	2	5	8	7	3	3	3	5	11	2
OCPFDLNE_00287	7538	6603	4724	3443	3386	7305	4248	6064	5430	4812	4322	8152	4885	358	3059	3445	3002	183	568	5152	3203	4454	3165	5493	5368	3571	3844	8718	9602	4959	7074	7057	11121	3128	4801	6844	5668	5029	4705	7734	5941	5672	5868	5430	4885	3397	4572	8073	3263
OCPFDLNE_00288	35	23	21	8	14	22	20	13	22	25	22	15	40	28	35	28	25	11	5	28	15	18	23	33	9	12	6	40	63	23	37	38	48	32	46	48	34	52	30	32	32	42	48	55	44	29	29	72	30
OCPFDLNE_00289	63	73	63	40	24	70	38	47	53	40	48	65	78	56	47	98	67	35	10	81	37	54	75	142	88	55	87	104	111	75	61	122	118	68	83	90	103	101	82	71	95	108	129	128	76	73	64	117	54
OCPFDLNE_00290	59	61	46	34	41	55	43	49	87	58	70	74	82	34	72	132	61	21	19	100	57	46	87	145	98	105	116	76	81	44	72	89	91	58	82	73	73	66	72	73	69	67	96	75	65	49	79	121	46
OCPFDLNE_00291	4	3	4	5	4	5	8	8	11	9	10	13	46	3	12	33	24	3	1	16	10	23	13	50	41	21	50	9	25	9	5	18	12	9	7	7	12	19	11	13	10	6	14	11	14	9	11	23	6
OCPFDLNE_00292	17	12	13	15	9	27	10	22	20	17	13	28	39	15	15	30	22	8	5	26	10	22	11	31	42	23	33	28	16	13	6	24	32	16	11	8	18	18	11	15	15	16	20	21	14	10	11	25	15
OCPFDLNE_00293	27	21	26	20	14	25	22	28	31	30	46	42	80	43	36	44	39	34	9	51	31	46	44	61	75	28	58	54	34	26	15	48	39	20	27	24	45	49	39	40	55	41	64	67	28	22	45	59	34
OCPFDLNE_00294	3	6	4	3	2	11	9	21	24	22	11	41	28	18	10	34	15	12	4	17	15	11	23	36	36	15	39	6	6	7	11	10	12	0	2	12	7	6	6	10	16	14	9	23	26	6	12	35	11
OCPFDLNE_00295	33	31	23	26	16	37	27	40	60	34	36	76	99	9	50	81	64	17	8	58	34	46	29	50	77	33	41	43	35	38	42	45	90	25	30	40	48	41	38	55	47	49	37	52	73	31	40	125	38
OCPFDLNE_00296	36	17	15	6	12	55	26	40	43	42	19	49	78	91	36	27	30	75	2	37	14	13	15	33	39	16	17	33	30	10	29	13	27	9	25	36	28	26	12	47	35	34	22	46	29	20	32	94	30
OCPFDLNE_00297	22	30	23	7	8	27	20	18	31	40	26	53	63	77	38	83	47	59	12	37	36	30	40	44	42	33	55	35	49	20	20	51	34	27	35	24	42	67	26	37	42	49	53	42	30	36	58	55	32
OCPFDLNE_00298	20	19	10	6	15	23	19	19	28	17	22	26	49	52	27	62	27	28	4	27	12	31	37	41	36	22	28	22	31	17	19	20	40	21	21	27	38	31	27	28	33	52	39	50	31	23	34	40	38
OCPFDLNE_00299	4	0	2	1	4	5	4	3	9	12	3	8	21	3	8	10	13	1	0	4	3	7	4	8	10	3	3	3	4	4	2	4	0	2	7	4	6	3	3	7	6	10	6	3	3	6	5	16	7
OCPFDLNE_00300	77	67	43	35	48	89	46	225	269	72	181	241	203	60	84	228	135	32	59	167	77	198	199	400	599	284	305	81	78	65	64	78	107	41	77	73	91	88	69	133	154	133	159	147	158	75	99	269	74
OCPFDLNE_00301	93	100	59	46	52	110	73	109	77	88	70	128	143	68	85	121	67	59	21	118	57	96	77	146	122	89	107	146	139	86	100	144	200	62	103	128	144	109	101	137	125	116	139	147	83	65	96	178	84
OCPFDLNE_00302	23	18	16	9	11	28	15	26	19	16	7	28	22	4	7	24	5	13	2	12	9	18	3	26	15	13	11	20	20	16	14	27	27	12	13	10	13	25	17	24	13	11	13	12	12	13	14	26	15
OCPFDLNE_00303	13	3	7	4	7	9	3	8	10	6	4	12	13	9	9	12	9	11	1	8	5	11	5	8	15	12	10	6	3	2	3	3	5	4	3	9	12	12	5	7	12	12	9	13	12	9	10	19	3
OCPFDLNE_00304	1	0	3	1	0	2	0	5	3	0	0	0	12	3	1	2	5	1	0	4	0	4	4	2	2	0	5	0	3	0	0	0	0	1	0	1	2	0	1	3	3	0	0	3	0	1	2	1	2
OCPFDLNE_00305	0	2	0	1	0	1	0	1	1	1	2	2	8	0	3	7	3	2	2	4	4	6	9	10	5	1	14	0	3	0	0	3	3	0	1	0	1	1	0	2	0	4	4	5	0	1	2	6	1
OCPFDLNE_00306	0	3	0	0	1	1	1	0	7	4	0	1	11	1	3	4	1	4	1	7	3	1	11	6	9	3	11	1	2	3	1	1	3	1	1	3	0	2	0	1	3	0	1	0	4	1	7	3	0
OCPFDLNE_00307	0	4	1	0	5	2	1	1	6	2	6	3	11	4	4	13	6	5	0	11	7	7	14	17	9	4	17	0	2	1	1	3	4	0	2	2	0	1	2	4	3	4	3	3	3	1	4	4	3
OCPFDLNE_00308	1	2	1	1	1	2	1	1	3	2	2	7	7	0	1	1	1	0	0	2	1	1	4	14	3	1	6	3	1	0	0	4	1	1	2	1	3	1	0	0	2	0	1	5	1	0	0	0	1
OCPFDLNE_00309	295	557	376	101	140	473	296	494	664	356	452	721	802	131	477	856	625	118	113	564	468	375	527	1149	1125	578	556	817	716	418	531	649	1027	274	386	688	766	560	685	556	575	774	549	905	630	331	460	1697	397
OCPFDLNE_00310	23	20	17	14	7	13	18	28	33	27	13	41	47	21	23	44	36	15	6	24	25	28	44	77	60	36	55	42	49	18	26	32	48	23	18	24	34	36	30	28	36	46	36	44	44	17	35	78	19
OCPFDLNE_00311	13	15	12	7	11	11	4	27	26	9	25	23	47	18	18	25	17	13	5	25	20	26	21	58	35	29	66	25	32	19	12	24	34	11	24	10	18	18	20	19	20	34	23	29	26	17	22	44	8
OCPFDLNE_00312	24	14	12	6	9	29	18	21	25	17	21	28	38	32	16	18	18	9	3	22	12	11	19	31	13	15	33	17	24	13	11	18	28	8	22	18	9	17	14	13	16	21	18	19	13	10	16	24	8
OCPFDLNE_00313	64	55	60	32	50	82	67	67	89	80	77	103	211	93	138	161	153	47	28	148	86	94	97	115	158	96	81	128	171	85	78	120	139	88	132	141	162	136	131	232	236	207	249	302	200	172	270	443	225
OCPFDLNE_00314	845	717	472	354	437	730	494	629	753	621	482	1084	1389	748	749	1151	890	608	130	935	566	624	631	1161	1308	609	918	1185	1110	662	615	1018	1528	576	788	884	1159	1070	920	1227	1309	1376	1206	1586	1011	833	992	2542	978
OCPFDLNE_00315	1	2	1	0	1	2	0	2	3	2	3	2	7	1	5	2	0	4	1	5	6	4	2	4	5	6	3	1	2	0	0	2	1	3	2	0	0	2	1	2	0	6	1	1	1	3	4	4	2
OCPFDLNE_00316	2	2	0	0	2	2	1	13	9	4	7	7	11	5	4	8	2	6	4	22	7	10	5	22	33	13	13	4	6	0	2	4	3	2	3	2	1	1	3	0	3	6	4	1	4	0	2	3	1
OCPFDLNE_00317	0	1	0	0	0	1	0	0	0	1	0	3	4	4	1	0	3	1	0	3	1	3	1	3	7	0	5	0	1	0	0	0	4	0	0	2	0	1	2	2	0	0	0	3	1	1	1	0	1
OCPFDLNE_00318	3	4	4	2	1	4	1	5	7	5	11	6	22	3	2	9	7	2	0	11	5	1	4	5	7	4	7	0	0	1	5	6	4	3	2	7	7	6	2	6	4	2	7	2	6	6	8	11	5
OCPFDLNE_00319	26	30	15	15	17	24	16	20	18	17	19	33	76	32	17	42	25	23	4	37	10	20	19	53	45	26	33	29	43	23	14	38	52	16	34	29	27	25	23	38	40	30	49	49	27	29	42	37	20
OCPFDLNE_00320	11	12	8	1	2	2	5	4	2	5	8	10	25	19	6	13	9	22	0	16	3	8	2	21	17	2	21	6	11	14	9	8	12	8	13	17	13	22	7	13	13	6	15	20	7	9	11	31	8
OCPFDLNE_00321	1	1	0	1	1	2	0	0	2	1	0	1	4	7	0	3	3	1	0	1	3	3	3	0	2	1	1	5	2	0	0	1	1	1	5	1	3	8	1	3	5	0	6	3	0	2	0	5	0
OCPFDLNE_00322	9	9	9	5	9	8	4	7	5	7	3	8	26	18	9	25	15	8	1	8	5	5	7	5	9	6	11	15	18	3	5	17	17	9	13	14	13	20	9	15	22	22	24	13	10	9	18	27	14
OCPFDLNE_00323	0	3	2	0	0	0	0	0	1	4	2	2	3	3	1	6	4	1	1	1	0	2	2	0	2	3	0	1	3	0	0	0	2	2	0	4	8	8	6	2	6	7	6	4	4	1	3	4	5
OCPFDLNE_00324	10	7	4	5	5	6	4	6	6	7	8	11	21	6	12	11	10	1	2	9	9	6	4	20	8	11	5	4	10	1	7	7	17	10	5	15	11	12	6	23	16	24	8	25	20	12	16	40	11
OCPFDLNE_00325	16	7	2	2	6	9	4	18	14	23	13	18	50	11	10	20	19	4	2	21	16	26	12	26	45	13	16	16	29	9	8	12	20	10	7	11	21	12	21	20	21	32	19	21	18	19	27	43	19
OCPFDLNE_00326	0	0	0	0	0	1	1	0	0	1	0	1	0	0	0	0	0	0	0	1	1	1	0	1	2	0	0	1	0	0	1	0	1	0	0	1	0	1	1	2	0	1	1	0	1	0	2	1	1
OCPFDLNE_00327	6	1	5	3	1	1	1	7	8	6	5	5	15	2	5	7	8	4	4	11	13	4	7	18	11	11	10	6	8	5	3	7	6	5	4	11	6	3	11	8	15	7	9	11	10	5	4	7	5
OCPFDLNE_00328	2	3	0	0	0	2	2	5	4	5	1	1	12	1	7	3	3	0	6	7	12	2	9	9	9	9	6	4	4	2	4	4	3	1	9	3	5	2	4	6	8	8	10	5	4	1	2	6	2
OCPFDLNE_00329	14	6	15	9	8	18	7	23	20	13	16	17	14	4	12	9	13	9	4	22	5	11	5	23	20	16	16	12	22	9	16	13	19	8	11	25	14	8	12	12	10	7	14	10	8	5	12	22	16
OCPFDLNE_00330	0	1	0	0	1	4	2	1	3	5	1	5	14	0	6	2	5	0	0	4	1	1	2	3	8	3	6	3	5	1	1	3	5	3	3	2	1	3	2	3	3	8	5	2	2	1	5	7	3
OCPFDLNE_00331	12	24	21	12	8	43	26	36	18	38	33	47	56	28	28	40	27	20	11	44	23	28	23	23	33	27	27	28	27	20	16	33	46	20	31	29	37	30	25	27	34	34	43	23	25	18	47	38	33
OCPFDLNE_00332	0	0	0	0	0	2	0	1	2	0	0	1	1	0	1	0	0	0	0	0	0	0	1	0	0	0	0	0	0	0	0	0	0	0	0	0	0	0	0	0	0	0	0	0	0	0	0	0	0
OCPFDLNE_00333	2	5	0	0	1	2	2	2	3	1	4	1	10	34	3	1	4	29	1	6	3	10	4	3	2	7	9	1	3	2	0	2	10	0	1	4	4	2	3	1	1	3	4	3	3	4	5	11	3
OCPFDLNE_00334	0	1	0	0	0	2	0	0	0	1	0	0	3	0	0	0	1	0	0	0	0	1	0	2	0	0	0	0	1	0	1	1	0	1	1	0	0	0	0	2	0	1	0	3	1	0	0	2	1
OCPFDLNE_00335	0	0	0	0	1	1	1	0	1	0	4	0	6	2	2	0	1	1	1	4	1	0	6	3	3	2	2	3	0	0	0	3	2	0	2	0	0	4	2	5	1	6	3	4	0	2	2	0	0
OCPFDLNE_00336	3	0	1	0	1	1	1	1	5	3	2	2	6	2	2	5	7	0	0	3	5	3	3	6	2	2	5	0	2	1	4	7	1	2	3	4	4	1	1	2	3	1	7	5	0	1	3	0	3
OCPFDLNE_00337	2	0	0	0	1	2	2	0	1	0	0	4	6	0	2	4	0	0	0	3	2	2	2	7	3	0	2	3	0	0	1	2	1	0	0	2	1	0	0	2	1	1	2	3	2	0	4	3	1
OCPFDLNE_00338	14	17	13	8	9	11	19	10	16	11	15	20	48	28	20	57	29	19	4	28	14	15	17	26	28	15	29	22	38	9	15	29	26	7	20	16	34	22	8	23	38	41	49	35	25	20	32	52	20
OCPFDLNE_00339	0	0	0	0	0	0	0	1	0	0	1	0	9	2	3	3	1	1	0	2	0	0	3	3	0	0	0	0	1	0	0	0	1	0	0	1	0	1	0	0	2	0	0	4	0	0	1	0	1
OCPFDLNE_00340	66	37	49	27	38	69	70	87	49	82	59	114	112	47	51	58	67	29	4	61	33	37	34	64	81	29	35	66	74	57	45	74	121	29	57	67	74	78	63	83	87	89	83	68	102	43	65	97	49
OCPFDLNE_00341	0	0	0	0	0	0	1	0	1	2	1	0	3	0	0	1	2	0	0	1	0	0	0	0	0	0	0	2	0	0	0	1	1	0	0	2	1	0	0	0	1	0	1	3	0	1	0	0	0
OCPFDLNE_00342	7	9	8	3	4	11	11	15	13	11	12	20	18	8	7	25	9	4	1	8	5	14	7	12	12	15	17	12	8	14	4	20	18	7	13	8	12	15	6	17	14	13	16	21	9	7	16	17	12
OCPFDLNE_00343	0	0	0	0	0	0	0	0	0	0	0	0	0	0	0	0	1	0	0	0	0	0	0	0	1	0	0	0	0	0	0	0	0	0	0	0	0	0	0	0	0	0	0	0	0	3	0	0	0
OCPFDLNE_00344	2	0	1	1	3	2	1	4	3	6	4	11	12	6	4	0	4	4	0	2	5	2	3	6	3	1	5	2	4	1	2	0	7	0	1	9	7	3	2	7	4	12	1	6	13	5	10	8	0
OCPFDLNE_00345	0	0	0	0	0	0	0	0	0	0	0	0	4	0	0	1	0	0	0	0	0	0	1	1	0	1	0	1	0	0	0	0	0	1	0	0	0	2	0	1	1	0	2	0	0	1	0	1	0
OCPFDLNE_00346	4	1	3	1	4	3	1	6	0	0	5	3	27	3	2	6	5	1	2	5	3	3	4	12	7	5	5	7	7	4	5	4	1	4	4	1	2	7	5	5	7	7	6	4	4	2	2	7	3
OCPFDLNE_00347	0	0	0	0	0	0	0	0	0	1	0	0	1	0	0	0	0	0	0	0	0	0	0	0	0	0	0	0	0	0	0	0	0	0	1	0	0	0	1	0	0	0	0	0	0	0	0	0	0
OCPFDLNE_00348	5	6	11	3	1	4	10	8	12	6	10	11	9	1	13	7	5	3	1	9	9	3	15	16	13	19	24	4	9	9	5	2	7	6	4	9	9	3	4	6	6	6	10	10	20	2	15	23	10
OCPFDLNE_00349	8	0	0	2	1	1	4	5	11	0	1	8	13	0	3	5	5	0	1	9	2	2	3	2	5	4	5	1	1	0	1	2	9	5	2	5	2	3	4	8	2	0	3	9	5	3	1	10	4
OCPFDLNE_00350	7	5	2	2	2	4	5	5	5	7	7	5	29	7	9	4	4	1	1	1	3	3	7	16	4	7	7	4	8	2	1	4	6	3	3	2	4	2	3	9	2	8	3	2	8	3	5	6	5
OCPFDLNE_00351	3	1	2	1	2	1	2	5	9	1	0	5	9	3	1	1	8	7	1	5	4	3	2	6	6	0	1	1	4	1	2	1	7	3	5	1	3	2	5	2	7	2	3	9	3	4	1	11	1
OCPFDLNE_00352	1	3	1	3	2	5	2	5	1	4	2	5	10	2	3	3	2	0	0	1	1	2	1	3	11	3	2	9	4	1	4	3	2	1	8	5	6	6	8	6	11	4	5	6	7	4	7	8	7
OCPFDLNE_00353	9	1	1	1	1	3	6	3	3	0	1	0	6	2	10	4	3	2	0	3	1	4	6	4	1	4	1	5	8	5	4	4	7	5	11	3	3	2	5	7	4	5	5	6	13	6	5	10	5
OCPFDLNE_00354	3	10	8	4	1	5	7	5	8	5	3	6	15	2	8	6	13	0	1	3	3	6	3	13	4	6	6	8	22	9	9	10	13	13	12	9	13	12	14	15	18	21	5	15	12	3	10	18	8
OCPFDLNE_00355	1	0	1	0	0	1	0	0	0	0	0	1	3	0	0	0	0	0	0	0	0	0	0	0	0	0	1	1	0	0	1	1	0	0	1	0	1	1	0	0	3	1	0	1	0	1	0	2	1
OCPFDLNE_00356	0	0	0	0	0	0	0	0	0	0	0	0	0	0	0	0	0	0	0	0	0	0	0	0	0	0	0	0	0	0	0	1	0	0	0	0	0	0	0	0	3	0	0	0	0	0	0	0	0
OCPFDLNE_00357	0	1	0	0	0	0	0	0	0	1	0	1	2	0	0	0	0	0	0	0	0	1	1	1	1	2	0	0	0	1	0	0	0	0	0	0	0	1	0	1	1	2	0	0	0	1	1	3	0
OCPFDLNE_00358	4	4	1	2	2	4	9	5	10	7	7	10	6	6	10	3	8	0	5	11	6	11	2	0	12	12	4	10	12	8	11	4	4	5	4	11	4	4	4	13	7	11	5	6	7	1	11	13	7
OCPFDLNE_00359	4	4	1	0	1	4	1	3	0	5	2	1	4	0	2	2	1	0	0	0	3	2	1	3	1	0	2	3	1	1	1	3	0	0	1	1	2	0	1	1	0	0	2	2	0	1	1	5	3
OCPFDLNE_00360	40	55	40	11	12	46	28	47	36	35	39	58	112	0	50	138	89	0	23	77	27	51	40	115	68	62	79	63	56	25	28	50	76	26	40	39	47	55	44	51	48	58	69	53	34	36	36	93	26
OCPFDLNE_00361	376	551	408	163	270	364	242	268	314	248	331	401	897	167	499	1633	944	149	316	636	290	575	449	1217	1043	631	1121	682	737	402	282	760	950	402	545	448	633	737	625	445	649	650	770	931	434	473	573	1107	518
OCPFDLNE_00362	95	156	96	46	59	112	71	74	103	73	94	98	245	149	172	444	295	178	77	197	76	151	121	282	241	156	276	166	179	131	98	206	206	132	168	129	158	211	161	136	166	181	223	222	111	140	219	338	179
OCPFDLNE_00363	126	158	113	43	63	109	90	65	108	84	91	101	253	142	188	513	318	116	82	183	90	137	167	366	290	184	322	194	230	149	88	241	228	134	181	145	196	187	182	149	221	233	297	308	129	163	217	344	173
OCPFDLNE_00364	67	83	57	38	37	61	36	33	60	40	76	62	147	77	158	291	167	60	63	102	60	84	97	196	151	91	134	118	147	77	71	134	159	71	122	91	137	163	104	105	143	156	194	154	76	86	176	216	132
OCPFDLNE_00365	77	97	58	33	48	77	50	55	51	55	76	81	208	57	124	337	196	58	47	127	43	92	100	220	193	124	176	107	145	72	55	170	183	75	118	99	118	180	128	132	166	170	216	212	90	97	140	260	126
OCPFDLNE_00366	86	122	77	36	56	89	69	57	71	68	85	86	254	94	136	413	233	106	51	138	52	110	123	205	201	125	191	177	174	122	60	173	241	100	127	151	164	178	167	125	207	213	232	282	127	131	174	289	174
OCPFDLNE_00367	174	246	188	90	137	175	132	126	181	145	204	191	567	192	394	992	574	149	124	366	139	217	243	379	463	292	412	353	419	257	201	447	405	223	387	274	406	467	371	349	511	508	569	551	297	380	468	730	391
OCPFDLNE_00368	21	22	24	15	33	26	18	28	19	14	22	24	95	54	29	125	82	43	19	44	29	29	50	62	93	40	77	40	38	27	22	51	64	29	43	54	45	60	43	64	70	60	56	97	47	54	62	147	61
OCPFDLNE_00369	55	62	51	21	26	36	41	38	66	42	44	47	163	82	124	203	183	64	28	108	43	92	85	105	180	91	116	115	128	92	61	116	108	59	114	76	125	121	130	141	144	177	181	226	114	116	172	300	146
OCPFDLNE_00370	7	7	4	4	10	17	15	9	7	16	12	22	61	11	25	38	43	7	4	35	11	22	16	25	51	14	22	9	12	8	9	10	20	6	18	19	21	15	6	28	22	33	32	42	27	21	41	80	22
OCPFDLNE_00371	9	14	6	7	9	28	19	11	13	17	8	31	47	3	22	39	26	6	4	15	11	15	14	28	28	18	12	12	16	7	18	14	28	3	13	12	17	14	17	26	25	22	15	17	16	14	20	51	14
OCPFDLNE_00372	0	1	2	1	0	3	2	5	6	1	5	3	10	0	4	0	3	0	1	3	0	2	2	2	5	2	4	2	2	2	0	2	0	1	0	0	1	0	0	2	0	1	1	3	1	1	4	7	4
OCPFDLNE_00373	20	19	16	8	10	32	37	40	35	35	26	47	79	9	32	99	39	8	10	31	24	35	24	43	48	26	41	35	33	18	11	41	33	25	32	31	36	39	30	63	51	47	50	73	51	37	50	92	58
OCPFDLNE_00374	163	187	126	72	82	153	187	187	230	190	164	260	469	110	287	497	332	58	48	271	176	232	202	244	337	215	212	250	289	174	205	270	334	187	267	266	322	354	269	339	407	359	439	460	306	275	326	698	289
OCPFDLNE_00375	23	17	16	5	16	30	21	32	24	23	32	44	56	6	18	51	34	5	6	31	15	32	16	37	46	22	29	30	30	18	16	35	39	12	23	18	38	26	27	36	33	38	31	48	30	10	20	54	20
OCPFDLNE_00376	0	0	0	0	1	0	0	1	1	2	0	1	6	1	2	1	1	0	0	1	0	2	0	1	0	0	1	0	0	0	0	0	0	0	2	1	0	1	2	0	1	1	1	2	1	0	1	1	1
OCPFDLNE_00377	1	4	2	1	1	2	2	1	3	3	1	3	8	6	1	4	3	5	2	6	1	3	3	6	5	3	5	4	1	3	3	3	4	2	3	2	1	4	4	6	6	1	3	4	6	4	7	3	5
OCPFDLNE_00378	7	7	13	0	4	11	6	13	30	9	14	18	36	3	23	16	21	2	3	19	11	19	16	37	33	14	24	10	10	14	5	7	17	10	13	14	21	14	18	26	17	17	17	12	22	11	16	40	21
OCPFDLNE_00379	6	2	3	0	1	2	3	8	9	1	6	7	21	2	5	8	6	4	2	4	2	5	8	11	18	10	7	9	7	6	7	10	2	1	2	6	6	2	4	9	8	9	11	5	7	7	10	18	6
OCPFDLNE_00380	0	0	0	0	0	0	0	0	0	1	0	1	4	0	1	0	1	0	0	6	1	0	0	1	3	0	0	0	0	0	0	1	0	0	0	0	2	0	0	1	0	0	1	1	0	2	0	2	0
OCPFDLNE_00381	0	0	0	0	0	0	0	0	0	0	0	0	2	0	0	1	0	0	0	0	0	0	1	0	0	0	0	0	1	0	0	0	0	0	0	0	0	0	0	0	0	1	0	0	0	0	0	0	1
OCPFDLNE_00382	2	0	0	0	0	0	0	0	0	0	1	0	1	0	0	0	0	0	0	0	0	0	1	0	0	0	0	0	0	0	0	1	0	0	0	0	0	1	0	0	0	0	0	0	0	0	0	0	0
OCPFDLNE_00383	0	0	0	0	0	0	0	0	0	0	1	0	8	0	0	1	0	0	0	0	0	0	0	0	0	0	0	0	0	0	0	1	2	0	0	0	0	0	0	0	0	0	0	0	0	0	0	0	0
OCPFDLNE_00384	1	0	1	0	1	1	1	0	1	1	0	0	2	0	0	1	1	0	1	0	0	0	0	0	1	1	2	0	1	2	1	1	0	0	0	0	0	0	0	1	0	2	1	0	2	0	1	0	0
OCPFDLNE_00385	2	1	2	1	2	0	1	0	2	1	1	2	6	0	1	0	1	0	1	2	2	0	1	3	1	1	0	1	3	1	1	1	0	0	0	1	2	0	0	1	1	1	0	1	1	0	0	1	0
OCPFDLNE_00386	6	4	3	1	8	5	4	7	9	2	4	7	15	1	10	18	13	2	2	8	8	17	9	13	13	13	11	8	9	5	5	15	12	4	11	9	5	17	14	15	17	9	20	20	13	17	14	19	8
OCPFDLNE_00387	51	32	33	13	11	42	29	39	54	53	47	53	98	82	49	75	54	39	12	53	21	43	41	75	65	33	71	64	57	56	21	51	84	25	41	52	43	35	38	46	51	64	55	86	48	40	50	88	41
OCPFDLNE_00388	14	10	2	4	7	23	8	10	11	19	7	13	27	17	15	8	15	9	3	18	7	12	11	5	7	9	13	6	15	3	5	11	16	9	16	7	12	6	6	15	12	5	4	15	10	7	9	9	4
OCPFDLNE_00389	1	2	4	0	2	4	3	3	5	4	7	4	12	1	5	9	6	0	0	6	4	3	0	6	7	1	4	0	4	2	4	3	0	4	2	1	1	4	5	5	3	7	8	6	5	3	3	8	2
OCPFDLNE_00390	0	0	2	0	1	0	2	1	4	1	1	1	7	1	4	2	3	1	3	7	0	1	3	4	2	1	1	1	1	0	0	1	5	1	3	0	2	5	1	1	1	2	4	3	1	0	0	1	0
OCPFDLNE_00391	1	3	1	1	0	0	0	0	2	1	3	3	12	1	2	2	4	0	0	1	3	2	3	1	3	1	4	4	1	3	3	3	10	0	2	1	3	2	0	1	3	2	5	3	2	5	7	1	0
OCPFDLNE_00392	0	0	0	0	0	0	0	0	0	0	0	0	2	0	0	0	1	0	0	0	1	0	0	0	0	0	0	1	0	1	0	1	0	0	0	0	0	0	0	0	0	0	0	1	0	0	0	0	0
OCPFDLNE_00393	13	8	4	13	10	22	9	22	17	16	14	21	22	8	12	13	9	2	1	7	3	1	1	7	6	3	3	7	2	3	6	5	6	9	6	5	12	1	4	5	2	1	3	3	6	2	8	10	5
OCPFDLNE_00394	54	47	32	26	26	37	28	42	32	20	26	37	35	13	23	70	39	13	6	37	22	23	19	52	39	25	36	49	35	15	15	49	48	32	30	28	39	37	43	33	48	39	30	35	15	16	27	64	16
OCPFDLNE_00395	484	840	519	272	330	793	493	752	636	503	547	1024	910	112	494	1163	725	126	170	802	507	574	793	1587	912	619	1045	1055	771	478	561	835	1168	411	558	605	686	584	562	684	698	661	659	639	536	370	541	1275	513
OCPFDLNE_00396	2	0	0	0	0	2	1	0	0	2	1	2	2	0	1	0	1	0	0	0	0	1	0	3	0	1	0	2	1	1	3	2	2	0	2	2	5	4	8	3	1	1	6	3	4	2	4	13	1
OCPFDLNE_00397	0	3	2	1	1	2	1	1	1	3	2	8	10	0	2	1	3	0	0	3	1	2	2	3	4	0	2	0	2	0	3	3	1	3	1	2	3	3	2	7	4	3	2	2	3	4	1	4	1
OCPFDLNE_00398	2	1	0	0	1	2	0	2	2	0	2	0	2	0	0	2	3	0	0	0	3	1	0	1	3	0	2	2	5	0	0	0	1	1	0	1	2	0	1	1	1	4	3	2	1	2	1	5	0
OCPFDLNE_00399	0	1	2	1	0	1	0	0	0	2	0	0	7	0	1	1	2	0	0	0	0	2	0	1	2	1	2	0	1	1	1	1	0	0	1	0	1	0	1	1	0	0	1	0	0	1	0	1	1
OCPFDLNE_00400	0	0	0	0	1	0	0	2	1	0	1	0	7	0	0	1	1	1	0	1	0	1	0	2	0	0	4	0	0	0	0	0	0	3	0	0	1	2	1	1	0	0	2	1	0	2	1	1	0
OCPFDLNE_00401	4	1	1	0	3	4	6	4	3	6	3	2	11	6	4	3	2	3	1	3	1	2	1	7	1	3	3	1	2	1	6	4	2	4	1	5	2	1	5	4	4	3	9	3	5	4	2	5	1
OCPFDLNE_00402	1	1	2	3	0	1	0	0	1	4	1	3	6	3	1	2	1	1	0	4	1	0	2	6	4	0	5	2	2	0	3	4	14	2	4	3	4	4	1	3	2	0	7	1	0	3	5	4	3
OCPFDLNE_00403	5	4	2	1	4	3	3	1	3	4	1	1	5	0	2	2	4	0	3	6	0	5	1	5	2	0	2	3	3	4	2	4	7	3	1	3	4	8	6	3	2	5	7	3	3	2	1	4	3
OCPFDLNE_00404	30	33	22	6	17	25	24	15	20	17	19	23	31	11	13	31	21	9	10	17	16	24	22	31	34	14	22	45	48	32	23	39	20	26	40	33	34	44	30	23	61	45	39	23	26	15	39	47	23
OCPFDLNE_00405	7	7	0	2	3	5	5	4	6	10	3	13	11	5	9	7	8	0	0	5	5	6	6	10	10	7	7	4	4	3	2	2	5	2	3	5	4	2	2	11	9	4	12	7	4	2	3	5	3
OCPFDLNE_00406	3	4	2	0	0	4	3	6	5	5	4	8	11	5	5	6	9	4	1	7	3	4	1	10	8	7	11	4	0	1	1	6	9	3	3	7	5	1	2	5	3	4	6	5	4	3	2	6	2
OCPFDLNE_00407	2	1	1	4	1	4	3	6	6	6	3	7	23	2	5	6	4	2	0	6	6	5	8	10	21	6	11	1	2	2	1	2	3	2	1	5	9	8	0	10	2	5	5	7	10	5	9	6	2
OCPFDLNE_00408	0	1	0	1	2	1	5	1	1	4	2	3	15	0	3	4	2	0	1	4	2	3	4	6	6	4	7	1	0	2	0	1	3	2	2	4	1	5	3	4	5	4	4	4	4	5	3	4	1
OCPFDLNE_00409	199	157	129	118	163	257	175	184	194	223	178	261	251	158	192	170	144	70	46	205	141	173	160	197	184	155	174	296	387	194	282	259	338	144	248	282	293	271	230	304	251	278	288	263	257	200	242	256	197
OCPFDLNE_00410	1368	1487	959	589	571	1534	838	1374	1065	986	943	1711	1461	1033	858	1266	927	790	175	1089	635	1153	845	1726	1408	921	1389	1749	1629	980	1069	1531	2444	701	957	1161	1319	1247	1140	1279	1271	1269	1343	1437	1075	747	979	1959	745
OCPFDLNE_00411	1141	1074	954	601	612	1261	828	1285	1060	1100	881	1287	982	652	663	746	612	476	174	924	707	797	609	1110	1134	786	827	1376	1140	853	1400	1065	1683	509	721	986	1007	860	820	957	769	744	702	780	747	603	740	1344	519
OCPFDLNE_00412	1	1	2	3	2	3	6	13	3	10	3	17	12	3	2	8	5	2	1	11	1	11	8	11	20	13	21	5	6	3	1	10	5	2	2	4	6	2	3	8	5	7	2	4	13	0	2	13	2
OCPFDLNE_00413	0	0	1	0	0	2	1	0	3	1	0	0	2	0	0	0	0	0	0	0	0	0	1	2	1	0	2	0	0	0	0	0	0	0	0	0	0	1	0	1	0	0	0	0	0	0	0	0	0
OCPFDLNE_00414	6	3	5	3	5	5	5	9	10	13	9	17	29	1	11	20	14	0	3	24	10	15	14	20	11	11	18	4	1	9	3	8	16	4	5	5	8	7	5	12	10	2	6	8	8	8	12	8	7
OCPFDLNE_00415	15	20	10	8	13	23	13	27	27	13	11	31	36	0	18	22	24	2	3	16	11	28	19	15	35	19	12	22	17	21	20	17	18	12	12	15	19	16	19	22	20	24	14	35	23	16	17	73	20
OCPFDLNE_00416	13	11	15	6	9	10	12	11	17	15	5	22	55	13	29	28	25	7	3	26	11	10	23	15	19	13	6	25	29	12	28	25	32	15	28	26	30	43	42	51	57	61	59	60	40	30	50	65	42
OCPFDLNE_00417	4	8	11	3	8	3	12	10	10	9	9	16	42	15	31	25	36	6	6	18	15	10	17	15	8	12	15	7	28	13	8	20	23	14	29	22	26	34	12	45	50	31	58	36	27	37	39	37	47
OCPFDLNE_00418	21	29	22	17	30	17	41	23	30	23	23	54	120	28	46	117	68	19	9	61	25	45	44	51	64	43	47	62	59	30	22	53	59	38	51	59	59	70	57	85	138	125	171	142	65	76	98	145	98
OCPFDLNE_00419	152	124	112	61	57	107	100	71	123	111	70	183	298	49	201	444	262	42	50	269	93	168	170	265	255	150	235	229	260	150	129	300	245	146	227	282	283	329	219	366	482	481	542	521	280	270	358	582	315
OCPFDLNE_00420	105	88	74	50	47	84	52	96	90	101	85	148	180	9	108	213	141	15	18	136	80	108	85	175	160	80	186	108	100	69	51	82	117	62	94	77	104	114	67	124	138	123	152	148	111	86	132	204	87
OCPFDLNE_00421	31	13	7	10	12	17	25	28	28	25	22	61	75	20	41	47	49	14	1	44	29	21	41	65	59	30	51	24	29	10	19	21	26	15	27	51	35	26	32	40	44	49	33	49	47	21	43	138	25
OCPFDLNE_00422	9	6	10	8	10	16	6	16	21	18	16	42	22	8	18	17	20	5	2	13	12	11	24	22	27	16	21	12	19	8	14	11	9	7	8	14	13	12	12	22	16	26	25	33	20	8	4	51	7
OCPFDLNE_00423	47	65	32	27	32	83	53	81	55	71	48	120	125	30	95	80	60	23	22	81	60	60	48	78	73	40	52	70	57	30	38	43	102	25	63	63	79	64	54	101	82	85	90	101	80	71	87	153	66
OCPFDLNE_00424	6	3	3	4	1	3	2	3	4	12	2	15	31	16	14	14	6	12	1	6	4	3	5	7	1	3	7	18	7	9	10	19	13	10	16	19	15	15	4	20	20	24	19	12	14	9	16	34	11
OCPFDLNE_00425	19	10	9	7	4	16	6	18	6	8	8	24	23	40	5	23	8	23	1	14	9	10	15	12	13	10	18	19	17	8	5	18	25	7	10	11	19	17	17	13	26	20	9	19	16	9	14	32	9
OCPFDLNE_00426	50	28	30	22	11	49	17	46	41	44	39	56	55	59	48	40	28	39	9	48	47	33	35	36	46	23	37	50	35	24	49	32	58	25	27	49	30	36	24	45	51	53	61	36	38	38	57	88	31
OCPFDLNE_00427	9	5	8	7	4	20	7	16	12	4	6	8	15	0	3	6	3	0	0	2	2	3	2	13	5	1	9	11	8	10	7	12	21	7	8	8	9	11	13	18	8	5	9	11	5	1	4	6	7
OCPFDLNE_00428	12	9	5	3	1	7	2	11	12	9	17	6	43	9	11	34	14	9	25	33	27	25	24	41	46	19	23	9	10	8	7	4	8	4	7	14	13	12	8	5	8	3	9	7	10	5	12	32	10
OCPFDLNE_00429	17	14	11	10	4	15	8	8	11	12	10	13	20	2	5	14	7	3	4	6	4	7	6	10	11	12	5	13	14	6	14	17	12	12	7	15	11	9	12	8	12	10	16	5	6	4	6	23	4
OCPFDLNE_00430	18	19	11	9	19	18	15	20	27	30	14	36	44	18	27	31	21	14	1	34	12	26	22	34	44	22	17	26	21	28	16	26	21	10	21	28	32	16	28	26	27	25	23	23	25	11	11	36	20
OCPFDLNE_00431	25	30	15	12	7	36	22	34	17	27	18	41	45	45	15	22	20	21	5	21	23	34	20	29	37	15	33	38	31	20	18	24	61	24	20	33	35	30	19	37	27	26	26	35	31	14	32	43	19
OCPFDLNE_00432	1407	1182	921	554	563	1543	597	966	890	668	712	1255	1009	258	586	959	617	195	278	774	455	771	599	1376	1021	914	1106	1814	2145	1058	1282	1730	2527	673	937	1308	1340	1180	1039	1095	962	1063	1105	1057	868	643	797	1459	627
OCPFDLNE_00433	0	1	0	0	1	2	3	4	5	2	2	6	4	4	1	4	2	1	0	3	2	1	5	4	4	5	1	1	0	1	2	2	8	3	1	3	3	6	4	1	1	2	2	3	2	4	2	7	2
OCPFDLNE_00434	1	4	0	2	0	0	1	3	6	2	1	3	5	2	2	2	0	2	0	1	3	3	0	4	1	5	1	1	2	1	0	3	4	2	0	3	0	1	1	6	4	1	6	5	0	2	2	7	1
OCPFDLNE_00435	0	0	0	0	1	0	1	1	0	0	0	0	0	0	0	0	0	0	0	0	0	0	0	1	0	3	2	0	0	0	0	0	0	0	1	2	1	0	1	0	0	0	1	1	1	0	0	3	0
OCPFDLNE_00436	1	3	1	1	1	4	1	2	4	1	2	7	11	1	1	7	3	0	1	1	2	4	2	12	2	1	8	2	6	1	0	4	2	1	6	1	4	2	5	4	1	4	4	7	8	2	2	21	3
OCPFDLNE_00437	2	2	0	0	0	4	1	2	5	5	4	8	7	1	6	3	0	2	4	3	1	2	6	5	3	2	0	1	4	0	6	1	3	3	1	2	2	1	1	5	3	1	1	5	6	3	3	2	3
OCPFDLNE_00438	11	11	12	10	5	16	11	16	6	10	16	17	18	0	5	17	12	0	4	10	4	16	8	31	17	14	17	20	15	8	10	18	32	10	5	17	15	11	12	11	18	25	10	10	11	8	15	31	12
OCPFDLNE_00439	4	5	2	10	2	7	4	7	8	6	7	5	13	0	2	6	2	0	0	4	8	2	2	15	7	6	6	9	3	9	7	7	6	3	3	2	3	6	7	7	6	5	2	1	3	3	4	10	6
OCPFDLNE_00440	2	0	3	0	0	3	4	6	3	1	0	2	0	0	3	4	1	0	1	3	1	3	2	13	0	4	4	3	7	2	1	2	7	0	2	8	3	4	1	4	3	7	2	5	2	4	4	6	1
OCPFDLNE_00441	0	0	0	0	0	0	1	0	0	0	0	0	7	0	0	0	0	0	2	0	0	0	0	0	1	0	0	0	0	0	0	0	0	0	0	2	2	0	0	0	0	0	0	0	1	0	1	1	0
OCPFDLNE_00442	107	91	50	26	22	62	34	30	19	33	23	52	34	8	12	45	29	2	6	37	11	24	38	42	41	27	24	70	81	52	31	75	79	32	40	47	46	37	34	57	59	52	55	63	33	26	50	88	46
OCPFDLNE_00443	24	19	10	8	2	8	3	1	2	8	2	6	6	3	3	10	9	0	1	4	0	2	5	13	5	4	3	15	22	8	8	16	20	6	11	10	12	11	10	16	10	20	15	19	11	5	12	12	12
OCPFDLNE_00444	30	10	13	10	7	12	7	2	4	5	2	6	2	3	3	4	2	1	1	11	3	3	4	8	13	4	5	18	9	6	8	19	18	4	11	9	10	9	6	9	8	11	10	14	2	3	2	11	7
OCPFDLNE_00445	57	37	35	22	23	27	18	13	12	13	7	23	27	2	7	19	17	5	8	34	9	14	14	17	10	10	24	33	24	11	17	19	39	14	21	10	12	16	15	10	16	25	25	17	6	7	16	20	6
OCPFDLNE_00446	182	169	108	56	50	94	55	49	32	32	37	57	55	14	18	50	32	9	6	48	22	33	32	96	40	31	57	132	139	73	51	106	137	30	58	44	66	65	48	39	56	44	51	45	19	22	21	75	32
OCPFDLNE_00447	36	24	11	15	13	25	22	27	28	20	30	40	34	6	14	32	16	5	14	38	30	28	32	72	66	48	59	16	28	27	27	20	50	12	16	19	27	19	25	36	28	24	36	26	33	7	24	61	9
OCPFDLNE_00448	2	3	1	1	1	2	0	4	0	2	2	4	6	0	0	7	1	1	1	3	2	4	4	1	1	0	1	1	1	2	1	2	5	2	2	1	5	3	2	1	4	5	3	2	3	4	3	3	1
OCPFDLNE_00449	2	2	4	0	2	0	1	2	0	3	2	5	9	2	2	2	6	1	2	2	4	4	4	3	2	5	1	5	2	2	3	5	2	2	5	5	8	8	3	2	5	3	2	6	1	6	3	2	0
OCPFDLNE_00450	13142	15804	11904	7435	9307	16927	13846	15587	16594	15219	15852	23068	24551	7464	16272	31513	19081	5887	3098	20997	10494	17450	13414	24674	17737	12724	20786	24553	27529	16086	11440	25102	30545	16576	23594	22148	26659	30997	21714	25523	31224	32630	36785	34415	19144	19125	31688	39488	21879
OCPFDLNE_00451	1077	1125	860	557	653	1059	856	1103	1229	934	929	1392	1391	216	906	1694	975	170	219	1210	775	1117	890	1785	1344	912	1474	1568	1696	977	791	1469	2001	916	1344	1283	1420	1651	1215	1265	1707	1661	1823	1852	1234	918	1566	2609	1131
OCPFDLNE_00452	1	0	2	0	0	0	1	7	0	2	1	5	6	0	1	1	0	1	1	6	2	3	1	5	4	1	7	1	0	0	3	2	3	1	1	0	1	1	0	2	0	1	2	0	0	0	2	12	5
OCPFDLNE_00453	9	8	7	2	2	9	6	8	5	10	4	13	9	8	2	8	7	5	0	12	7	4	5	14	13	6	7	7	12	5	5	2	13	4	10	5	9	4	4	8	7	3	6	3	4	5	13	15	3
OCPFDLNE_00454	1	0	1	0	0	1	0	0	0	3	1	1	6	0	0	0	0	0	0	1	0	0	0	0	2	0	2	1	3	1	0	2	0	0	1	0	0	1	0	0	1	0	0	2	0	0	1	0	0
OCPFDLNE_00455	14	15	8	4	13	24	11	18	6	17	10	39	39	4	20	8	13	7	0	17	8	18	10	24	28	8	16	29	26	13	14	13	36	18	22	11	23	14	8	28	45	23	33	29	22	18	21	20	19
OCPFDLNE_00456	4	5	1	0	6	5	0	8	5	3	3	11	8	0	2	4	3	0	0	2	4	3	2	3	8	3	5	3	0	3	1	0	8	3	0	0	2	1	0	0	9	2	1	4	3	1	0	6	1
OCPFDLNE_00457	15	29	18	5	15	24	36	43	35	27	36	37	86	24	52	89	53	11	5	59	22	61	42	80	75	50	82	30	41	19	18	46	52	25	36	23	38	42	46	35	47	44	62	54	30	34	54	73	40
OCPFDLNE_00458	0	0	0	0	0	0	0	0	0	0	0	0	0	1	1	0	0	0	0	0	0	0	0	0	0	1	0	1	0	0	0	0	0	0	0	0	0	0	0	0	0	0	0	0	0	0	0	0	0
OCPFDLNE_00459	95	83	56	36	31	97	87	143	116	108	99	210	242	40	111	201	129	30	23	135	72	134	104	201	229	116	161	72	62	49	39	81	159	32	59	85	90	66	63	88	95	84	86	93	82	63	57	194	62
OCPFDLNE_00460	17	21	15	10	6	11	26	32	24	15	32	33	37	0	27	51	22	0	7	44	33	55	47	117	62	50	102	23	27	9	19	27	27	14	21	19	32	20	28	23	23	33	47	31	22	17	23	49	19
OCPFDLNE_00461	100	62	35	48	36	95	77	87	89	81	50	148	167	0	93	55	65	0	11	50	48	38	37	69	62	43	59	79	70	41	70	52	97	43	36	88	81	77	53	128	111	98	114	100	116	63	89	239	63
OCPFDLNE_00462	0	0	0	0	0	0	0	0	0	0	0	0	3	0	0	1	1	0	0	1	0	0	0	2	0	0	0	1	0	0	0	0	0	0	0	0	0	0	2	0	0	0	0	0	0	0	0	0	1
OCPFDLNE_00463	1	0	0	0	1	0	0	0	1	0	1	0	9	0	0	0	0	0	0	0	0	0	0	0	1	1	0	0	1	0	0	0	0	0	1	0	0	0	0	0	1	0	0	0	0	0	0	0	0
OCPFDLNE_00464	0	0	1	0	0	0	2	0	1	1	0	0	8	0	0	1	2	0	0	0	0	0	1	0	0	0	0	0	0	0	0	1	0	0	0	0	0	1	0	0	0	0	0	1	0	0	0	0	0
OCPFDLNE_00465	0	0	0	0	0	0	0	0	0	0	0	0	0	0	0	0	0	0	0	0	0	0	0	0	0	0	0	1	0	0	0	0	0	0	0	0	0	0	0	0	0	0	0	0	0	0	2	0	0
OCPFDLNE_00466	3	4	2	1	4	8	8	6	9	10	14	20	21	3	9	12	8	3	0	11	4	10	8	7	13	3	6	2	0	6	11	6	3	6	9	2	8	4	7	12	14	8	6	6	11	1	6	19	10
OCPFDLNE_00467	2	2	2	1	1	2	3	3	3	1	2	4	7	8	5	11	3	2	2	6	4	1	3	5	13	2	3	6	3	4	5	7	6	2	3	3	6	5	2	7	4	6	7	3	2	2	2	7	3
OCPFDLNE_00468	2	4	4	2	0	3	1	4	7	4	1	7	9	3	4	7	4	0	1	7	3	2	4	4	8	3	11	2	3	1	2	4	6	3	4	0	3	4	7	3	7	5	3	4	8	4	5	6	5
OCPFDLNE_00469	22	27	26	12	18	22	24	28	22	22	23	23	50	10	19	65	32	6	9	37	22	35	46	62	48	45	68	38	31	28	22	30	33	20	30	30	32	33	19	19	31	36	27	36	26	21	35	58	28
OCPFDLNE_00470	3	7	6	4	0	2	5	11	4	11	7	17	24	0	12	22	17	1	1	14	6	9	10	19	19	11	14	4	2	14	2	14	15	2	6	5	8	10	12	6	10	8	6	9	9	8	7	16	2
OCPFDLNE_00471	6	6	4	5	2	8	11	12	13	13	6	14	36	8	16	28	13	3	5	36	27	18	36	48	40	20	34	22	9	9	5	12	29	23	14	10	20	30	12	19	11	17	30	24	16	13	13	29	14
OCPFDLNE_00472	11	8	12	3	6	12	14	20	18	9	17	16	39	10	19	25	19	6	2	25	17	17	17	43	27	11	26	15	7	9	7	15	16	6	6	15	14	12	20	11	15	15	22	22	10	5	14	34	16
OCPFDLNE_00473	0	1	0	0	0	0	0	0	0	0	2	0	4	0	0	0	0	0	1	2	1	2	3	2	2	5	6	1	0	0	1	0	2	0	0	0	0	2	1	0	0	0	0	0	0	0	0	2	2
OCPFDLNE_00474	0	2	2	4	1	2	0	9	2	8	2	6	12	4	4	7	7	2	2	5	5	3	6	11	6	8	6	3	5	1	2	0	1	5	1	4	3	5	1	4	2	4	5	3	3	1	1	6	3
OCPFDLNE_00475	3	3	2	0	0	1	3	5	1	1	1	2	12	4	2	8	2	2	0	8	7	7	8	17	9	15	24	2	3	2	2	3	14	1	8	2	0	0	3	3	3	1	1	2	0	1	2	4	2
OCPFDLNE_00476	122	103	62	91	95	199	221	355	430	293	284	530	704	0	417	546	483	0	70	745	375	367	616	612	903	296	441	214	208	131	161	164	306	115	160	235	220	205	181	409	357	348	257	374	491	216	321	953	238
OCPFDLNE_00477	98	45	26	40	50	68	60	138	210	155	79	226	255	0	198	220	175	1	27	265	186	130	189	289	271	134	192	86	72	35	76	74	54	57	41	90	95	99	66	92	91	92	70	58	91	66	89	230	72
OCPFDLNE_00478	7	10	13	4	12	12	19	17	40	22	20	34	53	30	27	71	54	7	11	86	36	49	118	143	105	63	122	15	26	13	10	15	26	12	12	12	17	26	23	22	29	26	32	34	14	19	28	30	13
OCPFDLNE_00479	38	52	39	14	26	38	33	63	51	32	55	52	115	56	81	125	80	36	40	223	123	118	367	429	253	184	347	64	50	30	21	76	49	29	38	38	62	51	46	35	58	45	43	58	30	43	57	75	38
OCPFDLNE_00480	4	10	2	4	8	4	10	8	11	13	16	20	39	13	14	20	17	7	5	23	12	9	27	35	45	21	40	18	9	8	1	4	8	4	6	4	12	9	11	11	8	12	18	17	16	7	15	31	9
OCPFDLNE_00481	12	32	19	4	11	17	25	18	31	22	21	35	49	51	24	52	38	40	4	28	16	34	19	54	47	39	27	33	34	21	39	16	39	13	20	41	28	32	30	28	52	59	44	32	42	28	46	115	30
OCPFDLNE_00482	1	8	4	3	4	4	5	3	11	8	3	16	13	0	5	5	3	0	2	0	5	4	3	5	7	4	5	1	4	1	3	2	4	3	3	6	3	2	2	4	2	6	4	6	2	1	4	8	2
OCPFDLNE_00483	6	2	2	3	1	4	1	3	3	6	2	2	7	22	2	1	3	31	0	4	2	1	3	0	2	4	2	4	3	13	4	4	10	2	1	3	3	2	1	2	7	0	2	2	5	1	0	7	2
OCPFDLNE_00484	4	0	0	1	3	8	1	2	3	4	6	1	4	7	1	3	4	7	1	2	2	3	8	2	2	2	5	5	5	8	2	6	8	0	0	4	1	2	1	4	3	4	2	1	1	1	3	5	0
OCPFDLNE_00485	1	3	4	3	3	16	6	8	8	7	8	3	10	3	16	3	5	10	3	6	10	2	1	6	6	6	1	0	2	2	5	4	2	5	0	1	3	0	1	2	5	0	1	1	3	5	5	9	1
OCPFDLNE_00486	2	3	3	1	4	11	6	6	8	10	5	13	8	2	6	10	6	1	4	4	3	5	8	10	9	6	9	3	3	0	1	4	14	2	5	4	6	3	2	4	7	4	7	9	6	6	6	10	12
OCPFDLNE_00487	4	12	6	4	7	9	7	16	12	16	9	15	33	23	17	32	18	15	11	34	14	29	19	38	44	19	21	12	17	6	8	16	12	9	7	13	11	18	9	9	21	24	30	13	10	11	19	22	16
OCPFDLNE_00488	1	3	1	3	2	0	0	3	2	0	0	4	16	1	3	1	1	1	0	4	4	3	3	10	10	3	6	1	2	0	0	0	2	0	1	0	3	4	0	5	1	1	0	3	3	3	3	5	0
OCPFDLNE_00489	3	1	1	2	3	1	0	1	3	0	3	0	7	2	4	10	3	5	1	3	2	0	4	2	5	3	4	4	4	2	0	0	2	0	2	2	3	2	2	3	4	2	1	4	4	1	1	11	0
OCPFDLNE_00490	2	2	2	0	1	1	4	5	4	1	3	1	10	4	1	6	4	2	1	4	0	5	2	3	3	5	2	2	2	0	1	1	6	0	1	1	2	1	2	0	5	3	2	3	0	1	2	3	2
OCPFDLNE_00491	6	0	4	2	4	4	11	17	16	11	12	19	17	7	11	14	6	7	1	10	15	7	20	44	28	14	23	3	12	3	5	4	12	2	5	5	5	5	9	7	9	0	3	10	8	6	15	19	3
OCPFDLNE_00492	5	5	0	0	1	1	1	4	3	2	0	5	8	0	2	4	3	3	0	3	2	3	2	1	0	5	1	5	6	0	1	2	2	1	1	3	2	0	2	2	1	0	2	1	2	1	3	1	3
OCPFDLNE_00493	10	6	5	4	1	15	8	18	16	20	16	31	27	21	16	16	16	11	3	18	11	17	11	18	27	18	11	7	0	1	12	7	15	5	9	15	9	8	12	14	9	19	10	14	9	17	23	15	13
OCPFDLNE_00494	0	6	1	0	1	1	1	0	2	1	2	0	6	1	1	3	6	1	1	5	2	0	3	5	3	8	9	2	0	1	1	2	0	2	1	3	2	3	2	1	7	2	1	2	4	2	1	2	0
OCPFDLNE_00495	3	3	1	1	3	5	3	2	7	4	1	1	5	16	1	2	3	8	2	2	8	0	1	3	4	4	0	6	4	1	1	1	0	0	2	2	2	4	2	1	2	2	1	1	2	2	0	4	1
OCPFDLNE_00496	2	3	2	1	4	5	5	9	2	2	2	14	19	0	4	9	3	0	2	7	5	13	8	6	12	5	12	6	3	0	4	7	2	5	2	1	6	6	6	5	3	7	6	3	8	1	4	6	1
OCPFDLNE_00497	3	1	2	0	1	1	0	0	1	1	1	1	2	2	2	1	2	0	0	4	0	3	0	4	1	1	2	3	1	0	3	2	2	2	2	2	4	6	1	1	3	5	1	1	0	1	3	1	1
OCPFDLNE_00498	5	0	0	0	0	1	1	1	0	0	0	1	4	0	0	4	1	0	1	1	0	0	1	1	0	0	1	6	3	0	1	2	0	2	0	2	2	2	2	1	1	2	1	1	0	0	1	2	2
OCPFDLNE_00499	0	4	1	0	0	1	1	0	1	5	2	1	3	1	1	0	3	0	0	0	0	0	1	1	2	0	3	4	4	0	1	2	1	2	4	2	1	2	0	2	1	2	4	3	1	1	0	2	3
OCPFDLNE_00500	11	5	9	2	2	15	6	6	12	8	10	13	25	12	12	23	17	5	0	14	15	5	8	29	16	10	13	9	10	16	11	11	11	13	13	15	12	9	12	15	20	28	19	16	10	21	26	39	14
OCPFDLNE_00501	2	0	1	1	3	1	0	2	1	0	2	3	12	0	4	6	5	2	0	6	3	2	3	7	2	1	3	5	5	2	3	6	2	4	3	3	5	5	3	5	3	3	6	2	2	4	1	9	4
OCPFDLNE_00502	0	1	1	1	1	3	0	2	5	3	0	4	6	2	1	6	2	1	0	1	3	3	0	0	0	1	3	2	3	4	1	1	6	2	2	2	0	2	1	5	1	0	3	4	5	1	0	3	3
OCPFDLNE_00503	1	2	0	0	1	3	0	2	2	3	1	5	3	2	2	5	1	3	0	3	2	9	1	2	4	1	4	1	6	1	0	2	9	1	1	5	4	3	1	4	4	2	2	3	1	2	2	3	2
OCPFDLNE_00504	4	6	4	1	3	3	1	4	3	2	2	8	9	8	1	6	4	2	0	3	1	2	1	3	9	1	7	9	9	4	0	2	6	2	3	2	3	5	4	2	7	1	4	1	4	8	1	4	5
OCPFDLNE_00505	8	6	3	4	1	7	5	5	2	6	6	9	18	1	7	7	6	4	1	6	5	7	2	7	6	10	6	17	7	4	5	12	4	6	5	2	9	7	5	9	8	9	14	8	8	5	3	4	3
OCPFDLNE_00506	4	1	0	2	1	1	0	0	0	2	1	0	0	3	3	2	0	1	0	1	3	0	1	3	0	0	1	3	3	6	0	0	0	0	2	1	0	0	1	1	1	5	6	4	0	0	1	3	3
OCPFDLNE_00507	10	10	2	7	4	6	4	2	3	1	8	8	18	3	9	8	10	4	3	7	7	1	2	15	11	1	9	7	10	5	12	2	5	5	2	7	4	7	6	5	2	10	6	5	2	5	5	8	5
OCPFDLNE_00508	28	47	26	19	20	47	40	68	55	42	39	70	79	51	47	47	49	23	11	63	25	48	55	95	79	49	90	49	50	39	27	55	90	23	32	42	53	35	38	49	67	71	67	68	52	30	50	72	30
OCPFDLNE_00509	1	0	0	0	3	1	2	1	4	1	1	3	7	0	1	3	2	2	1	4	1	1	2	1	4	4	0	1	0	0	0	0	1	1	0	0	0	3	1	2	2	0	0	1	2	0	1	3	0
OCPFDLNE_00510	0	2	5	1	1	1	2	3	0	7	2	3	7	0	0	2	4	3	0	1	1	5	6	6	13	6	3	0	1	2	1	1	1	0	0	2	1	1	3	2	4	8	4	7	3	1	3	5	1
OCPFDLNE_00511	7	4	3	4	1	5	15	22	16	17	5	24	30	0	12	21	14	0	8	15	12	18	9	19	17	14	23	7	11	3	4	18	20	3	10	5	6	6	7	8	14	11	12	13	15	12	11	14	12
OCPFDLNE_00512	11	8	7	4	2	11	12	23	35	17	11	41	34	3	23	30	27	4	2	34	24	26	26	40	58	31	37	15	6	6	12	16	17	11	2	10	15	12	10	25	28	15	27	21	31	10	20	38	6
OCPFDLNE_00513	1	0	2	0	0	0	0	0	1	0	0	1	15	0	3	1	1	0	0	2	3	3	4	4	0	2	1	1	3	0	1	0	0	0	0	0	1	0	3	0	1	5	0	0	0	2	2	1	0
OCPFDLNE_00514	2230	2206	1319	1005	1189	3025	2397	3591	2423	2578	2228	5473	4158	1292	1698	1872	1990	1266	179	2077	1417	1688	915	2092	2096	1039	1228	2392	1964	1207	1884	1748	4680	962	1182	1938	2179	1654	2016	2916	2251	2014	1940	2089	2206	1784	1670	5818	1630
OCPFDLNE_00515	4	3	1	1	4	5	5	4	9	5	5	7	18	3	7	17	3	2	1	5	5	9	16	15	8	6	17	2	6	3	2	7	4	3	4	9	14	6	4	5	3	12	8	11	11	5	8	15	8
OCPFDLNE_00516	0	0	0	0	0	2	1	0	1	0	0	0	1	1	0	0	1	2	0	0	0	0	2	0	0	0	0	0	0	0	0	0	0	0	0	0	0	0	0	0	0	1	0	1	0	1	0	0	0
OCPFDLNE_00517	2	1	0	1	0	0	1	1	5	2	2	5	5	0	0	1	0	0	0	1	1	1	2	3	4	1	3	3	3	2	2	0	8	1	2	2	4	0	1	1	1	7	2	0	5	1	1	2	1
OCPFDLNE_00518	0	0	0	0	0	1	1	2	2	2	0	2	0	0	0	0	1	0	0	0	0	0	1	1	1	1	2	1	0	2	1	0	1	0	2	1	1	1	3	0	3	2	0	1	2	1	0	2	3
OCPFDLNE_00519	0	0	0	0	0	0	1	1	0	0	0	1	2	0	0	1	0	0	1	0	0	2	0	1	0	0	0	1	0	0	0	0	0	0	0	0	1	1	0	1	1	1	2	1	1	1	0	1	0
OCPFDLNE_00520	1	0	0	0	0	1	1	1	1	0	0	2	3	0	1	0	0	0	0	2	0	0	0	0	3	0	1	1	1	0	0	1	0	1	0	0	0	0	0	0	0	0	0	1	0	0	0	0	0
OCPFDLNE_00521	0	1	1	0	2	0	0	0	2	2	0	1	6	0	0	1	0	0	0	1	1	0	0	2	2	0	3	0	1	0	3	0	0	0	2	0	1	1	0	1	0	0	2	0	0	2	1	0	0
OCPFDLNE_00522	0	0	0	0	0	0	0	0	0	0	0	0	0	0	1	0	0	0	0	0	0	0	0	0	0	0	0	0	0	0	0	0	0	0	0	0	0	0	0	0	1	0	0	0	0	1	0	0	0
OCPFDLNE_00523	0	1	1	0	0	0	0	1	1	0	1	0	4	0	0	0	0	0	0	0	0	0	0	0	0	0	0	1	1	0	0	0	0	0	2	0	0	0	1	0	0	1	1	0	2	0	1	1	0
OCPFDLNE_00524	0	0	0	0	0	0	0	0	0	0	0	0	4	0	0	0	0	0	0	0	0	0	0	0	0	0	1	0	0	0	0	0	0	0	0	0	0	0	0	0	0	0	0	0	0	0	0	1	0
OCPFDLNE_00525	0	2	3	2	5	6	2	11	11	6	7	5	10	9	5	12	3	5	5	3	1	3	6	4	2	5	3	1	4	0	5	2	7	2	4	2	4	3	6	6	5	2	1	5	3	6	4	3	7
OCPFDLNE_00526	2	4	7	1	1	10	4	14	12	4	14	6	35	9	11	25	14	4	8	27	31	19	41	98	41	53	82	6	14	5	7	5	16	7	6	2	9	8	6	7	10	12	18	7	11	6	11	8	8
OCPFDLNE_00527	0	1	1	0	0	0	1	1	1	0	2	3	10	0	3	3	0	0	1	1	1	0	1	1	1	1	2	0	2	0	0	0	0	0	0	0	1	1	1	0	2	3	4	1	0	1	1	3	2
OCPFDLNE_00528	125	141	98	48	65	102	106	86	94	87	88	138	175	74	93	206	137	50	17	165	63	108	85	92	153	65	91	166	191	104	63	164	173	114	136	116	161	181	119	123	158	159	175	244	87	106	120	213	106
OCPFDLNE_00529	4	8	2	3	8	9	6	13	12	7	6	5	19	12	19	12	20	8	0	9	5	3	8	8	11	4	4	9	5	6	3	5	3	6	8	11	11	8	12	13	10	14	8	13	14	5	8	34	7
OCPFDLNE_00530	1	0	1	0	1	0	0	1	0	0	1	1	2	0	0	0	0	0	0	1	1	0	0	1	0	1	1	0	0	1	0	0	0	0	0	1	0	0	1	0	3	0	1	0	1	0	1	3	0
OCPFDLNE_00531	146	142	105	74	85	190	108	135	111	105	87	261	293	37	138	201	168	27	24	187	74	130	121	228	178	111	158	227	201	98	123	132	269	89	129	228	206	180	176	303	268	256	277	253	287	163	246	506	181
OCPFDLNE_00532	5	4	6	0	5	7	8	10	13	11	16	26	25	0	9	23	19	0	1	22	11	19	12	23	31	17	21	12	8	5	4	16	28	4	5	9	9	9	14	10	19	22	19	22	18	13	20	25	7
OCPFDLNE_00533	1	1	3	1	0	1	2	3	6	2	2	7	8	2	3	6	2	1	1	10	2	1	5	11	12	3	5	1	1	2	3	1	12	0	0	4	1	5	4	2	0	2	6	3	1	3	2	5	2
OCPFDLNE_00534	3	1	3	1	2	1	4	5	8	7	2	8	12	4	5	9	6	5	0	5	5	7	2	8	9	3	9	8	2	7	2	2	8	3	8	4	4	4	4	8	8	4	8	10	6	5	7	11	7
OCPFDLNE_00535	12	3	3	6	4	3	5	8	2	5	5	8	19	4	11	10	10	3	0	5	6	2	6	9	14	4	10	2	4	6	0	6	4	7	4	4	10	4	9	8	7	12	12	9	8	12	7	15	5
OCPFDLNE_00536	1	6	6	2	4	6	5	1	3	6	4	3	20	9	7	10	7	16	2	8	4	3	8	11	11	5	9	7	6	4	4	8	5	2	5	3	12	8	3	5	5	5	9	6	4	7	5	17	1
OCPFDLNE_00537	11	24	10	9	17	29	18	27	33	21	17	33	44	82	25	52	35	70	2	25	26	20	18	37	45	12	36	34	36	26	15	26	31	14	30	29	39	14	34	29	29	50	27	53	33	19	39	70	27
OCPFDLNE_00538	8	8	10	6	7	4	4	7	13	8	6	20	28	32	7	18	13	18	3	7	4	4	3	11	12	10	18	15	13	14	7	7	23	9	8	8	13	12	9	10	13	11	3	5	8	5	13	23	12
OCPFDLNE_00539	4	3	0	0	3	0	1	0	1	2	4	6	11	3	2	2	7	2	0	1	0	4	4	4	1	5	5	2	0	1	0	0	1	0	1	1	1	4	3	0	4	2	4	0	2	0	2	9	3
OCPFDLNE_00540	0	0	1	0	1	2	2	0	2	1	0	2	3	0	0	1	4	1	0	3	4	0	0	4	1	2	7	0	0	0	3	0	2	0	1	1	1	2	0	0	1	1	1	0	0	4	3	5	2
OCPFDLNE_00541	7	9	8	5	3	9	13	17	10	13	18	16	30	6	15	30	22	6	8	26	16	20	29	46	35	18	45	16	17	2	9	20	23	7	5	1	10	17	10	19	27	15	21	25	26	8	17	38	15
OCPFDLNE_00542	47	43	32	20	25	38	45	52	51	53	50	72	113	32	69	116	65	17	21	81	40	44	69	169	89	82	116	67	50	45	32	53	61	36	34	51	64	67	56	72	64	63	79	86	50	43	56	114	47
OCPFDLNE_00543	40	37	27	14	18	41	29	35	28	30	36	55	56	83	30	48	33	60	0	48	21	28	28	50	36	27	52	49	40	44	23	52	45	29	33	25	49	33	37	40	41	33	46	42	27	26	31	43	24
OCPFDLNE_00544	13	7	4	3	4	8	17	16	30	11	12	13	37	3	14	27	24	2	5	22	4	24	12	23	33	19	29	20	32	9	14	20	27	11	15	16	15	13	23	22	18	13	27	26	24	18	20	41	17
OCPFDLNE_00545	14	26	19	1	6	15	10	21	20	17	21	14	39	21	32	68	34	15	10	58	19	36	33	68	48	43	62	44	35	26	22	38	35	29	30	34	25	49	37	42	32	46	52	44	20	23	49	57	43
OCPFDLNE_00546	568	492	297	233	266	744	480	660	488	579	349	1195	1232	389	474	514	511	297	24	470	209	390	228	323	409	215	253	593	538	319	335	492	875	289	413	521	670	507	484	867	763	712	764	759	752	483	708	1346	483
OCPFDLNE_00547	315	232	185	122	114	262	211	261	314	170	180	402	314	955	198	311	250	641	79	273	209	229	257	806	373	361	440	338	380	181	300	344	393	136	214	340	302	257	267	300	291	283	318	275	299	135	212	712	171
OCPFDLNE_00548	3	3	1	2	2	5	1	4	6	4	3	16	8	5	6	6	7	12	2	12	3	6	6	18	29	11	11	3	0	3	2	3	5	2	2	0	5	0	2	3	3	3	0	3	7	1	3	10	4
OCPFDLNE_00549	0	0	0	1	0	0	0	0	3	0	0	1	2	1	1	2	0	0	0	1	4	3	2	9	6	5	15	1	0	0	1	1	0	0	1	0	2	0	1	0	0	0	2	1	0	0	0	2	1
OCPFDLNE_00550	1	0	1	1	0	1	2	5	3	1	6	0	8	3	1	3	0	0	0	19	8	11	10	35	26	21	44	0	2	2	0	0	0	0	0	1	1	1	0	1	1	5	1	0	0	1	1	6	1
OCPFDLNE_00551	0	1	0	0	0	0	0	2	5	0	3	1	3	4	1	8	2	6	3	12	6	11	9	28	15	4	33	0	0	0	1	1	1	0	1	0	1	0	2	4	3	1	1	1	0	0	1	0	1
OCPFDLNE_00552	0	0	0	0	0	0	1	3	0	0	8	1	3	1	2	3	4	0	2	3	7	7	9	13	18	10	21	1	1	1	0	1	0	0	0	0	0	0	0	1	0	1	0	0	0	0	0	0	0
OCPFDLNE_00553	1	2	1	0	0	0	1	6	19	3	9	8	16	4	5	10	4	5	3	13	7	16	10	27	34	13	28	2	1	1	0	4	0	0	0	0	3	1	0	3	1	3	1	5	1	0	2	0	2
OCPFDLNE_00554	5	10	1	2	0	1	3	5	9	4	3	6	10	2	6	3	3	0	1	13	6	14	4	18	11	6	4	1	7	2	4	2	8	0	1	1	4	8	6	3	3	5	4	9	8	2	4	8	4
OCPFDLNE_00555	0	0	0	0	0	0	0	0	0	0	0	0	1	0	0	1	0	0	0	1	0	0	1	0	0	0	0	0	0	0	0	0	0	0	0	0	0	0	0	0	0	0	0	0	0	0	0	0	0
OCPFDLNE_00556	1	0	1	0	0	0	0	0	2	2	0	0	9	0	0	0	0	3	0	1	0	0	1	0	2	0	2	1	0	0	0	0	1	0	0	1	0	1	1	2	0	0	0	0	0	0	0	0	0
OCPFDLNE_00557	0	0	0	0	0	0	0	0	0	0	0	1	4	0	0	0	0	0	0	0	1	0	0	0	0	0	0	0	0	0	0	0	0	0	0	0	0	0	0	0	0	1	0	0	0	2	0	0	1
OCPFDLNE_00558	1	1	2	1	0	2	2	2	2	0	0	1	12	1	1	1	1	0	0	0	0	3	0	3	3	1	1	1	3	0	1	0	2	3	0	1	2	1	3	5	2	3	4	1	3	2	2	1	0
OCPFDLNE_00559	2	1	2	2	0	1	0	3	1	0	1	0	3	5	0	4	1	1	0	0	1	2	4	2	2	1	3	4	1	1	1	6	1	1	3	0	3	2	1	0	4	1	5	4	3	4	2	4	2
OCPFDLNE_00560	528	396	236	203	179	510	267	403	405	232	228	538	547	392	251	502	258	256	50	311	156	302	212	316	486	208	219	370	354	172	283	273	524	132	174	317	297	213	258	325	297	248	265	364	332	193	301	992	198
OCPFDLNE_00561	43	54	27	15	24	65	40	44	42	40	26	82	159	51	74	60	90	55	3	54	34	37	49	49	69	30	61	97	73	49	51	64	110	55	69	118	131	86	87	199	160	160	164	186	142	101	135	338	174
OCPFDLNE_00562	117	66	55	32	53	85	45	50	77	51	57	97	181	54	93	129	135	56	14	97	53	80	73	126	181	84	138	134	110	50	44	90	132	68	86	102	112	115	112	152	158	155	166	207	105	99	167	306	135
OCPFDLNE_00563	24	23	8	8	11	27	36	29	42	34	24	44	72	37	48	59	54	23	7	48	15	37	34	30	77	34	29	43	39	38	22	32	42	21	25	39	45	38	52	40	40	84	68	73	52	31	46	83	41
OCPFDLNE_00564	36	34	24	16	13	23	29	54	44	29	37	51	105	31	27	61	53	18	5	46	28	29	39	49	67	37	61	39	35	21	33	45	46	23	30	42	37	42	54	58	48	69	44	53	54	42	34	119	29
OCPFDLNE_00565	69	68	37	39	32	85	51	106	94	89	80	155	174	44	91	157	111	35	11	92	40	86	79	125	149	63	112	103	91	66	55	93	138	63	84	81	114	90	74	95	98	111	135	141	93	69	111	190	73
OCPFDLNE_00566	1	0	1	0	2	5	3	0	6	0	0	3	6	0	7	0	1	1	0	1	6	1	6	5	9	0	4	6	2	0	3	5	2	1	1	3	5	6	2	4	7	2	2	1	7	2	6	14	3
OCPFDLNE_00567	9	11	8	4	11	17	13	17	6	11	15	30	42	4	12	40	26	4	2	29	17	32	22	39	52	22	29	8	21	9	12	16	27	12	8	13	5	17	15	21	16	12	29	28	11	2	10	33	19
OCPFDLNE_00568	1	1	0	0	2	3	2	3	0	0	1	1	4	0	0	1	4	2	2	1	3	4	11	14	1	1	16	2	5	2	0	1	2	1	0	3	1	4	5	1	2	4	1	3	1	1	0	1	1
OCPFDLNE_00569	0	1	0	0	2	1	0	1	3	1	3	0	1	1	2	3	1	1	0	3	2	3	2	8	2	1	16	1	0	0	1	4	1	0	2	2	7	1	0	1	3	0	1	1	2	0	1	2	0
OCPFDLNE_00570	5	6	3	1	0	4	2	2	2	4	2	6	6	1	7	9	7	2	4	11	8	11	24	35	13	9	32	3	10	0	4	5	5	3	4	4	4	3	0	4	2	4	0	4	2	3	7	7	4
OCPFDLNE_00571	3	6	4	0	3	3	5	2	5	0	7	4	2	2	3	11	6	4	1	7	5	15	12	28	11	9	30	5	2	3	3	10	7	3	4	5	4	7	4	6	7	2	7	3	10	2	4	10	7
OCPFDLNE_00572	2	1	2	1	4	5	0	2	5	2	3	5	7	2	4	11	1	0	2	13	8	5	12	42	14	5	30	4	6	5	2	8	11	1	7	4	6	7	10	5	7	8	11	13	5	3	5	10	2
OCPFDLNE_00573	3	3	1	0	0	2	4	1	1	4	1	0	5	1	1	6	3	0	0	4	5	2	10	16	5	14	20	4	2	1	2	2	2	0	5	3	2	0	6	7	8	4	5	4	1	3	2	1	3
OCPFDLNE_00574	12	6	7	3	6	11	2	6	6	0	7	7	24	1	11	22	19	5	6	24	10	16	32	44	30	23	61	5	15	9	8	14	11	8	12	8	9	8	10	10	11	8	24	19	10	6	18	23	6
OCPFDLNE_00575	4	3	2	1	0	3	5	0	5	1	3	3	10	1	5	15	2	1	3	7	4	10	11	17	12	5	25	3	4	4	2	8	5	3	5	3	1	3	6	1	9	6	9	12	6	5	11	11	4
OCPFDLNE_00576	2	4	3	2	2	3	5	4	3	4	10	3	23	6	9	15	8	3	1	20	10	9	11	22	15	14	28	10	13	6	6	11	15	8	7	8	14	5	8	9	7	9	13	15	13	8	7	19	8
OCPFDLNE_00577	4	6	4	2	3	10	8	7	11	11	15	8	41	0	17	17	13	0	3	18	12	13	15	19	21	10	17	9	9	6	9	10	9	4	7	16	14	5	3	21	14	12	16	19	10	12	10	25	7
OCPFDLNE_00578	0	1	0	0	0	0	0	0	2	0	0	0	4	0	1	1	0	1	0	0	0	1	2	0	3	3	4	3	0	0	0	0	0	0	0	2	0	1	0	0	0	2	1	1	0	0	1	1	0
OCPFDLNE_00579	8	11	9	6	5	12	4	20	14	9	5	24	30	14	14	25	21	11	2	18	22	10	27	41	39	27	45	12	9	10	10	10	26	11	8	22	22	13	12	11	10	13	18	21	16	11	16	28	13
OCPFDLNE_00580	0	1	0	0	0	0	1	0	0	0	0	1	12	0	0	0	0	0	0	2	0	1	1	1	0	0	0	0	1	0	0	0	0	0	0	0	0	0	0	0	1	0	1	1	0	2	0	2	0
OCPFDLNE_00581	18	12	14	4	5	16	10	53	69	25	41	46	52	23	33	77	22	8	18	124	56	98	60	175	234	94	130	15	24	24	9	21	33	10	15	9	13	18	12	24	13	30	20	12	19	10	14	16	18
OCPFDLNE_00582	9	6	7	3	7	12	10	14	24	16	22	30	32	11	13	26	14	7	11	66	35	75	42	117	87	43	96	12	17	5	5	12	16	5	6	8	22	11	10	19	12	16	11	15	12	11	14	24	11
OCPFDLNE_00583	2	1	0	0	2	1	1	1	6	0	3	2	5	7	3	3	1	3	1	3	2	3	0	5	8	4	2	4	2	0	2	1	11	1	1	1	4	3	1	2	2	1	6	1	0	0	3	11	4
OCPFDLNE_00584	8	11	5	3	1	7	11	4	3	10	10	16	14	0	2	13	11	0	1	8	7	7	5	13	11	4	8	12	4	7	7	13	26	4	6	5	9	7	8	13	5	5	8	9	8	5	10	6	5
OCPFDLNE_00585	2	11	7	1	2	11	5	7	5	5	15	12	26	3	5	11	13	1	1	6	3	8	9	9	17	6	8	15	7	3	6	14	10	5	6	7	8	5	11	10	15	6	11	9	8	11	9	15	14
OCPFDLNE_00586	75	54	50	42	40	68	76	80	92	80	76	122	150	72	106	60	81	59	6	78	64	69	54	55	95	66	58	85	87	83	86	80	108	53	91	106	92	88	88	177	163	130	129	157	154	125	138	267	83
OCPFDLNE_00587	228	148	123	89	102	188	146	177	189	181	110	358	375	139	180	167	167	92	18	191	104	173	101	188	215	116	148	242	186	100	146	160	340	115	137	190	183	163	157	296	245	252	259	231	227	163	215	468	166
OCPFDLNE_00588	5	7	5	4	8	11	11	11	13	16	16	19	37	8	22	46	28	9	3	13	9	20	17	30	19	12	17	18	18	10	7	13	19	12	11	10	9	14	16	16	30	20	31	19	15	13	21	28	13
OCPFDLNE_00589	222	229	206	91	122	188	281	305	354	363	351	459	615	208	500	991	569	152	64	512	223	435	379	474	774	380	543	389	448	297	305	480	378	294	474	434	524	542	401	668	699	798	818	878	624	536	627	1100	498
OCPFDLNE_00590	93	83	60	35	43	101	64	86	85	88	92	132	190	52	108	176	130	24	19	124	58	91	79	149	135	89	133	137	136	68	66	120	137	78	105	124	148	143	87	148	153	143	176	176	91	79	132	200	90
OCPFDLNE_00591	370	329	181	225	213	466	292	423	369	362	254	712	824	166	319	346	404	144	25	310	186	303	144	264	304	148	238	357	330	175	251	284	561	154	217	361	336	252	280	591	484	436	483	446	453	311	499	1001	373
OCPFDLNE_00592	1	1	1	3	0	2	1	0	5	1	3	3	16	1	2	4	3	0	0	0	2	0	2	6	5	2	1	5	1	1	3	3	1	0	2	3	4	1	0	9	4	3	1	4	0	2	3	2	2
OCPFDLNE_00593	0	0	0	0	0	0	0	0	1	0	0	0	2	0	0	1	2	0	0	0	0	0	0	1	0	0	0	0	1	0	0	1	0	0	0	0	4	2	2	1	1	2	3	1	1	1	2	1	0
OCPFDLNE_00594	6	4	2	0	3	4	3	3	6	1	1	3	10	3	8	5	1	3	1	1	5	6	3	2	0	6	6	3	2	5	6	3	6	0	1	6	3	3	8	9	10	7	1	13	8	2	6	4	4
OCPFDLNE_00595	6	7	7	2	2	9	8	13	12	8	9	18	13	3	11	25	10	1	2	24	15	32	34	42	52	27	52	3	7	8	8	9	10	6	5	7	4	7	8	14	12	10	10	10	18	8	13	42	7
OCPFDLNE_00596	3	0	0	0	0	3	1	3	2	1	3	0	4	2	1	3	1	1	0	1	1	0	0	5	3	1	3	2	0	3	0	0	0	1	4	2	1	4	0	1	0	4	2	3	1	1	3	4	1
OCPFDLNE_00597	5	2	3	4	2	5	3	6	9	5	3	7	13	12	5	13	8	9	1	14	4	6	8	18	12	6	10	7	8	4	2	6	11	3	7	14	8	5	3	7	17	13	7	10	3	8	5	17	6
OCPFDLNE_00598	2	3	3	0	3	5	0	6	1	3	2	7	12	5	4	6	8	5	3	2	5	2	1	7	2	3	5	2	2	5	7	2	7	3	1	8	8	2	0	7	4	3	5	4	2	3	7	8	1
OCPFDLNE_00599	211	184	97	67	81	159	84	178	198	127	159	277	226	43	119	207	162	26	33	132	87	125	109	255	236	114	159	194	158	103	141	168	287	67	94	157	174	124	195	136	125	148	103	163	153	65	120	400	84
OCPFDLNE_00600	13	14	13	4	8	24	21	31	20	14	7	40	57	24	20	25	26	20	0	15	5	8	12	10	15	10	15	20	15	14	5	18	12	18	14	12	18	19	19	30	41	16	24	39	14	23	28	34	31
OCPFDLNE_00601	1	1	0	1	1	2	3	0	2	2	0	3	7	5	4	2	0	0	1	4	3	2	2	10	4	9	12	3	4	0	1	2	1	2	1	3	1	2	0	0	3	3	2	3	3	4	1	3	1
OCPFDLNE_00602	1	2	5	1	2	0	1	1	5	0	3	2	8	10	3	9	4	1	0	5	5	7	3	5	5	4	8	7	6	2	1	4	1	2	7	2	4	4	3	2	4	3	6	7	2	6	1	5	0
OCPFDLNE_00603	161	143	93	67	83	152	116	164	163	122	80	325	232	97	119	160	154	75	7	125	58	103	58	94	172	70	69	165	192	70	105	143	257	67	130	201	212	148	173	209	207	192	167	197	275	145	193	582	136
OCPFDLNE_00604	1	2	2	2	3	1	2	2	5	1	4	1	14	0	3	2	4	0	0	7	2	3	3	4	7	3	2	2	4	3	2	2	2	2	2	3	5	6	4	3	3	1	2	0	3	1	2	7	1
OCPFDLNE_00605	34	30	17	19	23	33	41	28	51	50	30	75	96	37	55	60	57	24	3	60	28	24	48	54	48	21	37	51	52	18	28	42	82	19	31	58	54	35	53	69	70	81	48	87	68	46	48	213	43
OCPFDLNE_00606	1	0	0	0	0	0	0	0	1	0	0	0	8	0	0	5	0	0	0	2	0	2	1	0	0	1	0	0	0	0	1	1	0	0	0	0	0	0	1	0	0	0	1	2	1	0	0	1	2
OCPFDLNE_00607	19	13	10	9	12	34	37	29	35	27	26	33	113	46	72	68	97	27	2	14	17	9	19	41	16	12	12	45	47	28	38	49	52	27	41	76	83	72	52	68	56	78	65	78	65	53	67	161	49
OCPFDLNE_00608	37	49	31	33	35	56	55	78	61	60	39	75	155	20	76	143	96	15	8	26	23	21	44	56	22	21	41	79	59	42	48	77	139	40	57	88	109	78	95	79	107	138	111	129	90	61	121	221	74
OCPFDLNE_00609	54	90	66	48	61	136	98	102	111	95	112	175	261	11	134	206	192	17	14	50	48	37	65	76	53	40	83	116	131	108	93	125	190	86	96	109	168	162	122	111	123	161	165	189	119	86	152	206	90
OCPFDLNE_00610	116	81	63	36	71	154	48	56	92	61	48	155	134	23	59	42	64	25	17	89	39	45	34	86	82	55	57	74	62	22	63	67	103	30	30	40	84	47	50	93	71	61	68	54	58	39	56	144	29
OCPFDLNE_00611	27	34	21	17	16	41	16	23	40	16	29	34	48	6	16	22	13	6	5	37	19	23	19	28	46	17	27	42	19	14	15	32	27	11	16	11	28	11	21	24	15	23	19	19	19	13	19	39	12
OCPFDLNE_00612	6	3	5	4	1	2	4	2	2	1	4	16	8	37	1	6	1	24	3	4	1	4	5	5	8	7	11	6	3	3	4	1	3	2	3	3	6	6	3	8	5	2	2	0	2	9	1	14	1
OCPFDLNE_00613	2	4	1	0	2	3	1	4	2	2	1	6	16	3	3	3	6	1	0	7	2	3	6	5	8	5	5	1	2	5	2	2	5	1	3	10	6	3	4	3	12	3	3	4	3	3	6	13	4
OCPFDLNE_00614	19	15	12	13	9	27	21	19	21	18	18	46	49	13	27	31	28	28	1	18	4	19	10	23	27	6	25	31	34	17	15	20	36	15	13	16	25	18	27	38	27	24	35	24	30	26	27	66	38
OCPFDLNE_00615	64	68	48	36	18	89	52	39	44	31	32	92	112	31	47	62	63	25	5	49	28	52	31	58	64	50	52	97	93	59	38	65	101	58	71	70	78	75	47	87	105	111	99	101	84	78	57	152	66
OCPFDLNE_00616	191	196	120	78	94	200	95	137	124	103	103	179	202	40	100	195	146	36	22	138	70	150	113	224	180	99	177	205	149	96	84	158	290	90	103	127	162	151	128	197	179	170	172	190	115	93	93	258	84
OCPFDLNE_00617	35	37	30	26	34	58	44	81	91	59	67	110	110	1	63	78	55	1	11	101	33	66	41	48	79	47	29	28	10	13	28	24	44	16	12	27	38	23	43	38	21	26	15	32	29	26	37	100	31
OCPFDLNE_00618	201	174	111	83	100	223	162	192	149	156	110	284	291	149	165	133	155	127	21	217	111	203	158	281	262	150	208	301	263	133	139	210	398	111	163	271	224	237	187	364	346	315	331	301	308	214	267	481	246
OCPFDLNE_00619	4	1	1	0	1	4	5	4	8	8	5	13	14	2	4	6	14	1	1	13	6	5	4	11	3	3	3	7	0	1	3	2	5	1	1	0	3	1	3	7	3	6	4	1	4	3	2	14	7
OCPFDLNE_00620	3	1	1	2	0	3	4	7	10	10	2	14	6	17	8	6	7	9	1	8	6	9	14	9	8	12	15	8	12	5	3	1	4	3	3	5	2	8	3	8	4	9	6	9	5	3	7	14	9
OCPFDLNE_00621	27	19	15	8	10	19	18	47	53	37	41	63	47	23	26	34	25	30	7	35	24	37	35	65	50	27	54	18	22	11	12	21	20	8	11	19	18	16	23	17	24	23	24	32	19	11	23	50	17
OCPFDLNE_00622	11	4	2	4	3	11	15	16	17	9	9	25	15	0	5	13	13	1	0	6	3	6	8	8	15	4	9	7	6	2	5	5	5	3	6	4	7	3	10	13	6	14	13	10	14	5	7	18	4
OCPFDLNE_00623	2	0	0	1	1	2	3	1	1	2	1	2	1	0	1	2	2	1	0	2	2	1	1	3	3	2	0	1	3	1	1	0	1	1	1	0	2	1	1	0	1	1	4	0	1	0	1	2	1
OCPFDLNE_00624	17	13	7	3	11	23	11	15	12	11	11	19	40	4	17	18	12	5	7	19	12	11	18	27	25	16	21	13	21	11	13	12	12	10	12	23	12	12	15	16	11	12	15	10	22	11	17	21	10
OCPFDLNE_00625	0	0	0	1	0	1	3	2	0	0	3	1	1	4	4	6	4	3	0	2	2	4	2	2	4	1	1	1	0	0	0	0	3	2	1	0	0	2	1	0	1	0	1	3	0	0	2	3	1
OCPFDLNE_00626	7	7	2	1	6	7	7	6	4	9	3	16	30	13	15	20	16	9	1	13	2	14	9	16	21	5	12	8	12	6	5	14	20	8	7	13	18	16	11	27	20	13	16	13	14	6	9	36	7
OCPFDLNE_00627	0	0	0	1	0	0	1	0	0	0	3	1	0	0	1	3	0	1	0	4	1	4	0	3	4	1	0	0	0	0	1	0	0	1	0	0	0	0	0	3	3	0	0	1	2	1	1	3	1
OCPFDLNE_00628	28	9	6	12	11	14	14	17	25	12	15	32	45	1	13	8	17	1	1	10	13	4	12	15	17	8	6	23	7	14	12	21	31	8	11	24	21	15	19	27	21	18	11	21	32	16	26	40	15
OCPFDLNE_00629	3	3	4	2	0	3	2	1	6	2	3	4	6	0	2	2	7	1	0	5	2	2	1	2	1	4	3	4	7	8	5	4	4	3	5	4	5	9	1	5	6	9	10	5	9	1	8	13	4
OCPFDLNE_00630	7	9	4	6	6	21	8	20	27	11	11	23	64	20	18	21	34	15	0	21	6	14	10	9	25	5	12	3	20	6	13	13	15	3	4	15	18	8	8	12	8	8	18	21	18	11	14	55	23
OCPFDLNE_00631	13	12	9	8	10	17	9	14	14	10	7	20	32	24	16	25	22	19	7	16	13	5	2	15	22	14	6	21	13	13	19	9	21	7	11	14	20	17	18	19	6	17	12	21	19	10	7	63	17
OCPFDLNE_00632	268	222	143	109	113	280	137	197	155	133	126	258	234	22	111	134	140	25	22	162	99	136	99	223	150	111	159	279	277	164	146	258	506	120	158	194	198	198	142	208	206	163	191	201	127	105	107	240	111
OCPFDLNE_00633	447	420	308	220	225	584	316	382	283	386	295	480	343	297	224	369	229	165	42	276	154	277	233	384	254	180	312	680	630	426	317	517	681	300	401	453	412	463	304	538	412	432	439	389	281	260	355	388	248
OCPFDLNE_00634	130	132	108	62	101	183	143	127	99	144	93	216	272	91	100	156	123	58	18	129	77	108	85	149	122	61	90	192	180	79	89	155	248	97	106	131	165	150	98	228	200	164	189	185	138	138	142	261	126
OCPFDLNE_00635	6	11	5	5	5	12	4	5	3	6	7	9	20	3	6	4	7	1	15	26	20	22	41	77	30	27	61	12	8	9	8	13	10	1	9	1	14	8	2	16	8	9	12	11	3	3	15	19	8
OCPFDLNE_00636	11	5	3	4	5	12	3	8	7	8	5	10	9	34	7	3	1	17	0	5	2	6	4	2	6	5	2	15	4	6	4	12	8	5	9	10	9	10	6	16	19	16	15	12	8	10	9	13	13
OCPFDLNE_00637	26	24	8	13	4	27	16	15	15	13	18	28	33	27	23	12	13	18	2	21	11	8	12	14	19	5	6	32	42	11	19	13	45	20	14	23	28	20	11	38	21	24	30	21	28	21	15	35	18
OCPFDLNE_00638	6	4	5	0	1	8	7	10	1	5	4	5	11	0	4	4	4	0	1	3	1	4	4	3	6	6	3	10	0	4	5	2	4	2	6	10	7	6	8	8	12	13	6	10	13	3	9	13	4
OCPFDLNE_00639	0	0	0	0	1	0	0	0	0	0	0	2	1	2	0	0	0	1	0	0	1	0	0	1	0	0	0	1	1	0	0	0	0	0	0	0	0	0	0	0	0	1	0	0	1	0	0	1	2
OCPFDLNE_00640	1	0	0	0	0	1	0	0	0	0	1	0	11	0	1	1	0	0	0	3	0	0	0	0	1	0	0	0	0	1	0	0	0	1	0	0	0	0	1	2	3	1	2	3	1	0	0	1	1
OCPFDLNE_00641	0	0	0	0	0	0	0	0	0	0	0	1	1	1	1	1	1	0	0	1	0	1	0	3	2	1	0	0	3	1	1	0	1	0	2	0	1	1	1	1	0	0	0	0	2	2	1	2	0
OCPFDLNE_00642	6	1	2	1	1	3	1	5	3	4	3	3	8	2	3	7	2	2	0	6	1	4	2	2	0	1	3	3	1	5	4	6	3	2	2	2	5	2	3	1	4	9	8	5	1	0	1	2	1
OCPFDLNE_00643	0	2	0	0	0	2	1	3	8	6	5	5	10	1	9	6	2	0	1	4	3	5	12	11	11	7	12	4	0	2	4	1	6	2	1	0	3	2	3	6	8	2	0	3	6	0	2	13	1
OCPFDLNE_00644	1	1	0	0	1	1	0	1	0	0	1	1	0	0	1	1	0	0	0	0	1	5	1	0	2	3	4	0	1	0	1	1	5	1	3	0	0	1	0	2	2	6	1	0	0	0	0	3	0
OCPFDLNE_00645	2	0	1	0	0	0	0	4	1	0	3	0	7	3	0	1	1	0	1	0	1	3	1	5	1	0	0	0	0	0	0	0	10	1	1	0	0	0	1	4	2	0	0	2	0	2	0	3	0
OCPFDLNE_00646	37	20	11	14	16	30	40	40	57	39	27	57	80	0	58	61	65	0	2	27	33	24	23	50	46	27	28	37	32	14	37	19	31	16	32	52	54	39	25	67	73	66	67	63	52	22	59	178	30
OCPFDLNE_00647	7	5	6	3	6	7	12	15	14	14	7	25	35	0	23	30	25	0	1	12	5	6	11	10	24	13	24	6	10	3	10	10	13	9	12	22	17	11	17	27	34	17	28	35	27	16	40	82	16
OCPFDLNE_00648	0	1	2	0	2	4	1	1	3	1	3	5	10	0	2	4	6	0	0	4	2	1	1	1	2	3	3	1	3	1	3	0	1	0	1	3	3	1	3	4	9	2	4	5	9	9	11	19	5
OCPFDLNE_00649	1	0	0	0	1	1	1	1	6	3	5	4	8	0	1	2	6	0	0	4	1	0	2	5	8	4	5	0	2	1	2	0	9	0	2	0	4	1	3	11	4	12	1	7	6	3	5	19	8
OCPFDLNE_00650	0	0	0	0	0	0	0	0	0	0	0	0	0	0	0	0	0	0	0	0	0	0	0	0	0	1	0	0	0	0	0	0	0	0	0	0	0	1	0	0	3	0	0	0	0	0	0	0	0
OCPFDLNE_00651	0	0	0	0	0	0	0	0	0	0	0	0	0	0	0	1	0	0	0	0	0	0	0	0	0	0	0	0	0	0	0	0	0	0	0	0	1	0	0	0	3	0	0	0	0	0	0	1	1
OCPFDLNE_00652	0	0	0	0	0	0	0	0	0	0	0	0	0	0	0	0	0	0	0	0	0	0	0	0	0	0	0	0	0	0	0	0	0	0	0	1	0	0	0	0	0	0	0	0	0	0	0	1	0
OCPFDLNE_00653	0	0	2	0	0	1	0	0	0	0	0	0	1	0	0	0	0	0	0	0	0	0	0	2	0	0	0	1	1	0	0	0	1	0	0	0	1	0	0	0	1	0	0	0	0	0	1	0	0
OCPFDLNE_00654	0	0	0	0	0	0	0	0	0	0	0	0	1	0	0	0	0	0	0	0	0	0	0	0	0	0	0	1	0	0	1	0	0	0	0	0	0	0	0	1	0	0	0	0	0	0	0	0	0
OCPFDLNE_00655	1	0	0	0	0	0	0	0	0	0	0	0	1	0	0	1	1	0	0	0	0	0	0	0	0	0	0	1	0	0	0	0	0	0	0	1	0	0	1	0	0	0	0	0	0	0	1	0	1
OCPFDLNE_00656	0	0	0	0	0	0	0	1	0	0	0	0	1	0	0	0	0	0	0	0	0	0	0	1	0	0	0	0	0	0	0	0	0	0	0	0	0	0	0	0	0	0	0	0	0	0	0	0	0
OCPFDLNE_00657	1	0	0	0	0	2	0	0	1	1	1	2	4	3	1	0	0	2	0	2	2	0	0	0	0	1	0	4	0	0	2	0	0	0	1	2	2	0	0	1	0	0	0	1	1	1	0	0	0
OCPFDLNE_00658	0	1	2	0	0	0	0	0	0	0	0	0	2	0	0	1	1	0	0	1	1	0	0	2	1	0	1	0	0	1	0	0	0	0	2	0	0	0	1	2	2	1	0	1	0	0	1	0	1
OCPFDLNE_00659	0	0	0	0	0	0	0	0	0	0	0	0	0	0	0	0	0	0	0	0	0	0	0	0	0	0	0	0	0	0	0	0	0	0	0	0	0	0	0	0	1	0	0	0	0	0	0	0	0
OCPFDLNE_00660	0	0	0	0	0	0	0	0	0	0	0	0	0	0	0	0	0	0	0	0	0	0	0	0	0	0	0	0	0	0	0	0	0	0	0	0	0	0	0	0	0	0	0	0	0	0	0	0	0
OCPFDLNE_00661	1	0	0	0	0	0	0	0	0	0	0	0	0	0	0	0	0	0	0	0	0	0	0	0	0	0	0	0	0	0	0	0	0	0	0	0	0	0	0	0	0	1	0	0	0	0	0	0	0
OCPFDLNE_00662	0	3	0	1	0	0	1	0	0	0	0	0	0	0	6	4	2	0	0	1	0	1	2	0	1	0	2	1	2	0	0	2	3	0	1	0	1	2	0	1	1	1	5	3	2	0	3	6	1
OCPFDLNE_00663	0	0	0	0	0	2	0	2	0	0	0	0	1	0	1	3	1	0	0	1	0	0	0	2	0	0	3	1	1	0	0	1	1	0	0	3	0	0	0	0	3	3	0	0	0	1	1	0	2
OCPFDLNE_00664	0	0	1	0	0	0	0	2	1	0	2	0	2	0	3	2	1	0	0	1	2	2	2	1	2	1	2	5	2	3	0	2	2	0	0	2	1	3	0	3	1	3	7	0	0	0	1	3	0
OCPFDLNE_00665	2	0	1	0	1	0	2	2	2	1	0	2	3	4	2	2	1	7	0	0	2	1	2	2	0	1	3	3	3	1	3	0	0	2	2	3	1	1	1	1	2	9	3	3	2	1	1	3	2
OCPFDLNE_00666	1	0	1	0	0	0	0	1	0	0	0	0	1	0	2	0	0	0	0	0	1	0	0	0	0	0	0	1	0	0	0	0	2	0	0	0	0	1	0	0	0	1	0	0	0	0	0	0	0
OCPFDLNE_00667	1	0	0	1	0	0	0	0	0	1	0	0	3	0	0	0	0	0	0	0	0	0	0	0	0	0	0	0	0	0	0	2	8	0	0	0	0	0	0	0	0	0	1	0	0	0	1	1	0
OCPFDLNE_00668	1	0	0	1	0	1	0	2	0	0	0	2	3	0	0	2	0	0	2	1	0	0	0	0	0	0	0	1	0	0	3	0	2	0	0	1	0	0	0	1	0	1	1	0	0	0	0	1	0
OCPFDLNE_00669	2	1	0	0	1	2	1	1	0	0	0	0	1	0	0	0	0	0	0	0	1	0	1	0	0	0	0	0	0	0	2	1	0	0	0	1	0	1	0	1	0	0	0	0	2	0	0	0	1
OCPFDLNE_00670	0	0	0	0	0	1	0	1	3	0	0	0	1	0	0	0	1	0	0	2	0	1	0	0	1	0	1	0	0	0	2	0	0	1	0	0	0	1	0	0	2	0	0	0	3	0	0	0	1
OCPFDLNE_00671	2	1	1	1	1	0	1	0	0	1	1	1	2	0	0	0	1	0	0	1	1	0	1	0	0	0	0	4	1	1	0	2	3	1	0	2	0	3	0	3	2	1	1	2	2	1	2	1	3
OCPFDLNE_00672	3	3	0	1	1	0	0	0	2	1	1	1	3	0	0	0	1	0	1	1	0	0	1	2	1	1	4	5	1	0	3	0	2	0	0	4	4	1	3	1	3	3	3	3	2	2	0	2	2
OCPFDLNE_00673	1	1	1	0	1	2	1	0	1	0	1	0	2	0	0	0	0	0	0	0	1	0	0	1	1	0	0	0	3	2	3	0	2	0	2	1	0	1	0	0	4	0	0	2	1	1	0	2	1
OCPFDLNE_00674	8	4	0	3	1	2	0	1	1	0	1	2	4	0	0	1	1	0	0	1	1	1	0	1	1	3	1	5	3	1	3	3	4	1	5	7	6	0	1	2	4	4	3	2	3	3	1	14	2
OCPFDLNE_00675	1	1	0	0	1	2	0	0	1	0	1	0	5	0	1	0	0	0	0	0	0	0	0	2	1	0	0	0	0	1	1	1	2	0	1	0	2	0	3	0	0	2	2	1	1	0	0	5	1
OCPFDLNE_00676	1	0	1	0	0	0	0	0	0	1	0	0	0	0	0	0	0	0	0	0	0	1	0	0	0	0	0	0	0	0	0	1	1	0	0	1	0	0	1	0	0	0	1	0	0	0	0	3	0
OCPFDLNE_00677	0	0	0	0	0	0	0	0	0	1	0	1	1	0	0	0	0	0	0	0	0	0	0	1	0	0	1	1	1	0	0	0	2	0	1	1	3	0	0	0	1	0	2	0	1	0	0	0	0
OCPFDLNE_00678	1	0	0	0	0	0	1	0	1	0	0	0	1	0	0	0	0	0	0	1	0	0	0	0	0	0	0	0	0	0	0	0	5	0	1	0	1	2	0	0	1	0	0	1	5	0	0	3	0
OCPFDLNE_00679	3	1	2	3	0	2	0	0	1	1	1	0	0	0	0	0	0	0	0	0	0	0	1	0	0	0	0	0	3	2	4	2	0	1	1	0	2	0	0	1	0	3	4	0	3	0	2	5	0
OCPFDLNE_00680	1	0	0	0	0	0	0	0	0	0	0	0	0	0	0	0	0	0	0	0	0	0	0	0	0	0	0	0	1	2	2	1	0	0	0	0	0	0	0	1	0	1	0	1	0	0	1	0	1
OCPFDLNE_00681	10	13	4	5	4	5	4	5	5	4	0	8	18	0	4	0	3	0	0	6	1	1	7	12	6	2	8	15	11	2	8	12	27	5	8	8	10	6	11	12	16	6	13	14	8	7	15	27	13
OCPFDLNE_00682	14	9	3	4	8	4	6	9	9	7	6	17	26	0	4	9	7	0	0	1	7	3	3	7	6	8	14	11	19	9	9	4	29	12	8	16	12	16	4	17	23	25	20	25	8	18	18	32	18
OCPFDLNE_00683	7	5	3	0	4	5	3	3	4	1	1	2	13	0	4	3	5	0	1	4	1	4	3	16	6	2	7	2	9	1	6	10	10	0	3	4	7	4	2	2	4	6	7	9	4	6	6	7	5
OCPFDLNE_00684	4	2	0	0	0	0	2	0	2	0	0	1	11	0	2	0	0	0	0	1	1	0	0	2	0	2	3	2	3	2	2	1	1	2	1	4	3	2	0	1	0	3	1	3	2	0	3	10	2
OCPFDLNE_00685	2	3	0	1	1	0	0	0	1	0	0	2	0	0	0	0	0	0	0	0	0	0	0	0	0	0	0	2	0	0	0	1	0	0	0	0	2	0	1	0	0	0	1	0	0	0	0	4	0
OCPFDLNE_00686	0	0	1	0	0	0	0	0	0	0	0	1	1	0	1	0	1	0	0	1	0	0	0	0	0	0	0	0	2	0	2	0	0	0	0	1	0	0	2	0	0	0	0	0	0	0	0	0	0
OCPFDLNE_00687	3	0	0	0	0	0	0	1	0	0	0	0	0	0	0	1	0	0	0	2	0	0	0	0	0	0	0	0	1	1	0	0	5	1	0	0	0	2	0	0	1	1	1	1	0	0	1	2	0
OCPFDLNE_00688	1	3	1	1	1	2	0	1	3	0	1	0	2	0	0	0	1	0	1	0	1	0	0	0	0	0	0	5	4	2	2	3	1	0	1	4	2	1	0	2	1	0	0	1	2	1	0	7	2
OCPFDLNE_00689	0	0	0	0	0	0	0	0	0	0	0	0	0	0	0	0	0	0	0	2	0	0	0	2	0	0	1	0	0	0	0	0	0	0	0	0	0	0	0	0	1	0	0	0	0	0	1	0	0
OCPFDLNE_00691	0	1	0	3	0	0	0	1	3	0	1	2	7	0	0	0	0	0	0	2	0	3	3	1	6	4	2	1	1	0	1	0	2	0	0	1	1	1	1	2	1	0	0	1	1	1	3	1	1
OCPFDLNE_00692	0	0	0	0	0	0	0	0	0	0	0	0	0	0	0	0	0	0	0	0	0	0	0	0	0	0	0	0	0	0	0	0	0	0	0	0	0	0	0	0	0	0	1	0	0	0	1	0	0
OCPFDLNE_00693	1	3	3	3	2	0	1	1	6	1	3	2	9	6	1	4	7	1	0	11	4	3	6	4	5	6	9	3	1	2	0	1	6	3	7	1	5	7	4	8	5	4	7	1	6	3	6	5	5
OCPFDLNE_00694	34	50	30	29	34	35	26	52	75	45	68	81	150	46	81	175	101	32	15	117	53	101	73	118	145	59	95	84	54	41	30	89	87	63	55	66	102	79	88	69	110	97	114	145	57	46	68	135	69
OCPFDLNE_00695	41	45	41	22	35	67	64	95	114	94	123	132	261	7	156	243	143	7	62	166	87	137	121	165	181	140	130	72	81	52	39	72	91	63	80	70	82	114	80	111	111	80	158	126	78	87	116	158	79
OCPFDLNE_00696	12	7	7	7	7	18	15	25	21	24	13	27	62	2	23	29	16	3	1	10	5	9	8	13	13	6	12	23	11	4	11	16	21	7	8	17	14	16	16	21	22	20	20	17	21	28	25	55	20
OCPFDLNE_00697	52	25	27	18	10	33	9	22	14	13	13	24	28	1	9	22	15	2	2	12	11	8	5	10	16	5	3	28	39	12	23	18	35	8	12	16	12	5	5	16	17	16	9	13	14	4	11	22	10
OCPFDLNE_00698	29	43	19	13	18	54	31	70	46	42	57	100	127	36	68	109	85	22	21	103	47	93	96	180	132	89	135	70	60	28	31	52	83	33	62	56	62	57	70	70	76	98	81	96	87	57	65	151	55
OCPFDLNE_00699	4	5	5	2	5	2	6	9	9	2	9	4	29	2	3	12	10	0	1	8	9	6	12	10	15	7	19	4	7	3	0	3	3	2	5	2	3	6	6	13	7	13	9	5	3	1	5	15	2
OCPFDLNE_00700	4	4	3	1	3	3	3	3	7	5	5	8	9	4	6	9	5	5	0	6	6	6	7	7	5	3	5	0	2	2	3	5	11	1	2	1	3	1	5	3	4	3	7	6	3	5	5	6	4
OCPFDLNE_00701	328	239	166	213	183	474	277	593	558	387	337	722	729	607	364	536	356	546	117	553	424	327	303	493	448	261	237	164	164	73	189	126	288	77	127	188	223	139	174	326	206	166	194	189	261	187	314	724	220
OCPFDLNE_00702	27	21	10	14	24	32	16	19	28	31	18	60	51	15	22	31	39	11	3	16	12	10	16	22	27	12	20	28	28	14	16	24	36	17	30	39	32	29	34	58	37	51	45	37	61	31	39	102	32
OCPFDLNE_00703	33	32	16	12	16	22	14	23	31	36	21	37	69	64	31	36	39	50	3	19	15	15	8	25	27	17	15	58	40	29	23	42	47	18	32	46	52	32	30	50	46	58	53	46	53	37	77	94	38
OCPFDLNE_00704	199	185	135	79	93	224	110	147	108	118	103	198	275	139	149	215	171	90	26	181	80	156	124	305	264	132	293	305	277	174	146	260	346	140	171	207	230	279	188	290	313	378	358	376	244	228	312	439	218
OCPFDLNE_00705	28	27	17	13	10	53	27	43	34	20	33	49	58	9	30	67	35	4	4	29	16	41	29	65	43	34	62	42	20	20	29	29	31	18	12	28	23	35	27	48	29	26	25	32	45	28	30	76	14
OCPFDLNE_00706	2	1	3	1	4	6	7	7	8	12	6	7	26	1	7	21	11	1	0	4	8	9	5	17	14	7	11	5	8	2	2	1	9	3	6	3	5	6	5	6	8	10	8	14	7	4	6	14	6
OCPFDLNE_00707	626	530	378	229	257	562	451	734	671	506	469	986	1224	192	530	1064	693	124	142	661	395	578	528	812	848	571	721	542	481	308	334	525	716	297	399	586	617	591	529	665	611	570	671	845	577	422	637	1384	466
OCPFDLNE_00708	54	10	40	14	21	80	40	41	81	108	31	70	62	112	86	30	29	174	23	47	76	39	24	25	24	26	21	25	21	16	57	21	33	20	20	22	34	19	33	51	36	20	25	40	73	30	53	87	46
OCPFDLNE_00709	5	2	2	2	3	8	6	3	3	13	10	18	12	5	8	12	12	3	1	1	2	3	1	2	11	5	3	4	7	4	3	5	14	5	7	3	5	13	5	17	10	10	9	14	44	14	20	28	14
OCPFDLNE_00710	1	1	3	2	1	10	9	6	8	8	16	13	24	19	5	12	16	6	1	8	3	5	5	10	11	7	3	6	8	2	3	9	14	5	5	12	4	4	15	21	15	15	23	16	33	15	15	61	13
OCPFDLNE_00711	4	6	4	4	2	7	7	13	13	7	8	9	12	16	8	15	8	10	4	16	3	9	10	12	26	13	16	1	9	6	11	9	8	3	3	10	6	5	6	10	11	10	10	13	19	6	6	18	8
OCPFDLNE_00712	8	8	2	3	5	9	9	8	12	11	14	25	22	9	9	14	10	3	5	18	11	12	12	25	32	21	13	8	15	4	6	14	8	6	9	17	13	10	8	23	14	13	13	25	14	8	12	26	5
OCPFDLNE_00713	1	1	0	0	2	1	1	0	1	1	0	0	9	0	1	0	2	0	1	1	0	2	1	1	2	0	2	0	0	0	1	0	3	0	1	1	3	0	1	3	0	4	1	0	1	0	1	7	1
OCPFDLNE_00714	3	1	2	3	0	3	2	2	1	2	1	3	3	0	0	0	0	1	0	1	0	0	0	2	2	0	1	2	1	1	0	1	4	0	1	1	4	4	0	0	0	1	0	0	0	1	0	0	2
OCPFDLNE_00715	0	4	4	3	1	4	2	2	0	4	5	3	7	0	6	7	7	0	0	2	1	0	0	0	1	0	0	1	3	0	4	4	6	6	0	3	4	2	0	0	0	0	3	0	0	0	0	0	0
OCPFDLNE_00716	64	65	52	28	22	55	36	95	82	63	82	105	120	30	62	148	87	19	27	144	80	99	131	237	189	142	173	75	83	55	57	69	98	41	70	80	71	77	59	73	82	81	102	99	72	48	91	185	39
OCPFDLNE_00717	37	56	25	14	32	34	49	87	79	63	71	118	123	44	76	100	73	29	23	139	58	98	128	211	217	130	183	70	60	44	52	62	59	42	48	64	41	54	65	75	81	82	95	96	100	56	87	149	68
OCPFDLNE_00718	2	0	0	0	1	3	3	4	6	7	11	7	10	1	5	4	8	2	0	6	2	6	4	2	15	1	6	1	4	6	2	3	6	0	4	4	6	2	1	3	5	4	0	9	5	8	6	13	4
OCPFDLNE_00719	2	0	2	1	1	5	3	1	4	2	5	4	4	4	6	2	1	1	2	10	3	0	7	7	11	1	12	3	5	3	2	2	3	3	8	3	4	5	1	2	7	3	6	9	5	2	6	2	4
OCPFDLNE_00720	0	1	0	0	2	2	2	3	1	2	5	2	7	1	3	2	0	1	1	2	1	0	0	2	2	2	1	0	1	3	1	1	0	1	4	2	0	0	0	3	1	0	5	1	3	0	0	1	0
OCPFDLNE_00721	7	4	5	3	2	7	9	12	10	9	24	20	17	12	12	33	12	8	7	39	10	27	18	40	29	23	38	6	14	7	6	6	7	5	9	7	8	9	8	11	12	13	9	17	7	6	11	24	2
OCPFDLNE_00722	8	19	6	5	8	7	5	11	15	12	7	15	25	6	4	19	15	10	2	34	9	30	18	45	49	25	42	12	15	9	8	13	21	2	9	7	11	6	10	10	20	6	4	14	19	8	12	37	5
OCPFDLNE_00723	11	11	7	2	5	11	5	4	3	7	4	7	4	0	4	8	4	1	1	5	3	2	0	4	0	1	2	13	6	4	6	4	13	2	6	13	4	12	4	11	8	20	9	10	11	8	6	18	7
OCPFDLNE_00724	117	100	69	57	62	117	78	79	92	74	78	153	167	13	72	58	56	15	15	90	49	61	50	93	101	60	68	153	159	65	102	125	179	63	104	149	131	103	92	164	160	134	142	174	153	93	165	323	103
OCPFDLNE_00725	18	6	7	1	2	9	6	13	12	13	10	11	13	0	11	6	10	0	1	9	7	9	2	5	4	9	10	10	8	6	14	8	5	4	7	11	8	8	8	7	9	8	7	3	7	11	12	21	9
OCPFDLNE_00726	5	4	2	5	5	7	5	12	12	5	4	26	24	12	16	25	11	6	2	10	12	13	22	44	27	13	23	10	15	4	7	18	12	6	5	16	12	8	6	11	4	17	11	11	12	12	8	39	7
OCPFDLNE_00727	0	0	0	0	0	0	0	0	0	0	0	0	5	0	0	0	0	0	0	0	0	0	0	1	0	0	0	0	0	1	0	0	0	0	1	0	0	0	0	0	0	0	0	0	0	0	0	0	0
OCPFDLNE_00728	4	0	0	2	0	0	0	1	1	0	0	1	2	0	0	1	1	5	0	2	0	0	0	4	0	1	1	0	2	1	2	0	1	0	0	2	0	0	0	0	2	1	2	0	1	0	1	3	0
OCPFDLNE_00729	54	47	26	19	17	38	25	37	45	29	21	55	53	40	45	40	31	30	10	48	30	44	36	90	79	44	57	44	81	43	37	57	91	19	36	57	54	36	34	59	68	66	64	72	71	47	63	144	32
OCPFDLNE_00730	0	0	0	0	0	1	0	1	0	0	0	0	2	0	0	1	1	0	0	0	0	0	0	0	0	2	1	0	0	0	0	0	0	0	0	0	1	1	0	1	0	0	1	3	0	0	0	0	0
OCPFDLNE_00731	3	2	2	0	1	0	1	0	1	0	0	1	4	1	0	0	2	1	0	3	0	2	0	0	1	0	2	1	3	2	2	0	0	1	3	4	1	2	0	3	6	1	2	1	1	0	4	3	0
OCPFDLNE_00732	0	0	0	0	0	0	0	0	0	0	0	1	2	0	0	0	0	0	0	1	0	0	1	1	0	0	0	0	0	0	0	0	0	1	0	0	0	0	0	1	0	0	0	0	0	0	1	0	0
OCPFDLNE_00733	0	0	0	0	0	0	0	0	0	0	0	0	3	0	0	0	0	0	0	1	0	1	0	0	0	1	0	0	0	1	0	0	0	0	0	0	0	0	0	0	0	1	0	0	0	0	0	0	0
OCPFDLNE_00734	0	0	0	0	0	0	0	0	0	0	0	0	8	0	0	0	0	0	0	0	2	0	2	0	1	1	0	0	0	0	0	0	0	0	0	0	0	0	0	0	0	0	1	0	0	0	0	0	0
OCPFDLNE_00735	0	1	2	2	1	3	2	2	0	1	5	4	17	0	1	1	2	0	0	1	0	2	1	2	5	0	2	1	4	0	1	3	6	1	1	0	0	0	2	1	5	2	4	1	1	1	4	0	4
OCPFDLNE_00736	0	0	0	0	0	0	0	1	0	1	0	0	11	0	0	2	0	0	0	1	0	0	0	0	0	0	1	1	0	0	0	0	2	0	0	0	0	0	0	0	0	0	1	1	1	0	0	0	0
OCPFDLNE_00737	1	0	0	0	0	3	0	2	0	2	0	2	9	0	1	3	1	3	0	1	1	0	0	2	0	1	0	1	0	0	1	0	0	0	0	0	0	0	0	1	0	1	1	0	0	0	1	1	0
OCPFDLNE_00738	0	0	0	0	0	0	0	0	0	0	0	2	6	0	0	0	0	0	0	0	0	0	0	0	0	0	0	0	0	0	0	0	0	0	0	0	1	0	0	1	0	0	1	0	0	0	1	0	1
OCPFDLNE_00739	0	0	0	0	0	0	0	0	0	0	0	0	2	0	0	0	0	2	0	0	0	0	0	0	0	0	0	0	0	0	0	0	0	0	0	0	0	0	0	0	0	1	0	0	0	0	0	0	1
OCPFDLNE_00740	1	0	0	0	0	0	0	0	0	0	1	0	6	0	1	1	1	1	0	0	0	0	1	0	1	0	0	0	0	0	0	0	0	0	0	1	1	0	0	0	0	0	1	1	0	0	0	0	2
OCPFDLNE_00741	1	1	0	0	0	1	1	1	0	0	0	0	6	0	1	0	0	2	0	1	1	0	0	0	1	0	2	1	0	0	3	0	0	0	0	0	0	1	0	0	1	2	0	0	0	0	0	1	0
OCPFDLNE_00742	0	0	0	0	0	0	4	0	0	0	0	0	3	0	0	1	1	0	0	0	0	0	0	1	0	0	0	0	1	0	1	1	0	0	0	2	0	0	0	0	0	0	0	0	0	1	1	0	1
OCPFDLNE_00743	2	0	2	0	0	0	3	1	0	2	2	1	12	1	1	7	1	0	1	3	1	1	2	0	1	3	2	1	3	1	0	3	1	0	1	1	0	1	3	1	1	1	0	3	1	1	0	4	2
OCPFDLNE_00744	0	2	0	0	0	1	1	1	1	2	0	1	3	1	2	3	2	1	1	1	1	0	3	2	0	0	0	1	1	0	0	0	0	0	1	0	0	1	0	0	2	0	0	1	3	1	0	1	0
OCPFDLNE_00745	1	1	3	1	0	1	8	4	0	4	2	10	10	3	2	4	2	0	1	5	3	4	6	4	2	4	1	3	3	0	3	3	6	2	0	2	5	3	3	2	4	4	8	7	7	1	1	4	7
OCPFDLNE_00746	0	0	0	0	0	0	0	0	0	0	0	0	0	0	0	2	0	0	0	0	0	0	2	2	0	0	0	0	0	0	0	0	0	0	0	0	0	0	0	0	0	0	0	0	0	0	0	0	0
OCPFDLNE_00747	0	0	1	0	0	1	1	0	3	1	0	3	4	1	1	5	0	0	0	0	0	0	0	1	1	1	4	0	0	0	0	0	0	1	0	0	0	2	0	0	2	0	0	0	0	0	3	1	2
OCPFDLNE_00748	0	0	0	2	0	0	0	1	0	0	0	0	0	0	0	0	0	0	0	0	0	0	1	0	0	0	0	0	0	0	0	0	0	0	0	0	0	0	0	1	0	0	0	0	0	0	0	0	0
OCPFDLNE_00749	0	0	0	0	0	0	0	0	0	0	0	0	3	0	0	0	1	0	1	0	0	0	0	1	1	0	0	0	0	0	0	0	0	0	0	0	0	0	0	0	0	0	0	1	0	0	0	1	0
OCPFDLNE_00750	0	0	0	0	0	1	0	0	0	0	0	0	3	0	0	2	1	0	0	0	0	1	0	1	0	0	0	0	0	0	0	0	0	1	0	0	0	0	0	0	1	3	3	0	0	0	0	0	0
OCPFDLNE_00751	0	0	0	0	0	0	1	0	0	0	0	1	2	0	0	3	0	1	0	1	0	0	0	0	0	0	0	0	0	0	0	0	0	0	1	0	0	0	0	0	0	1	0	0	0	0	0	1	0
OCPFDLNE_00752	0	1	0	0	0	0	0	1	0	0	1	1	9	1	1	4	2	1	0	0	0	0	1	0	0	0	0	0	0	0	2	0	0	0	1	1	1	0	0	1	0	0	0	0	0	0	1	4	0
OCPFDLNE_00753	0	0	0	0	0	0	0	0	0	0	0	0	1	0	0	1	1	0	0	0	0	0	0	0	0	0	0	1	1	0	0	0	0	0	0	0	1	0	0	0	0	0	0	0	0	0	0	1	0
OCPFDLNE_00754	0	0	0	0	0	1	0	1	1	1	2	1	4	0	1	1	0	2	0	1	0	2	0	0	1	1	0	1	0	1	0	0	0	1	0	0	1	1	1	0	0	1	1	0	0	0	1	0	0
OCPFDLNE_00755	0	2	0	0	0	0	0	1	1	1	0	2	8	0	2	2	1	1	1	0	1	0	1	2	0	2	4	0	0	2	1	0	0	0	1	0	1	0	1	0	1	1	0	0	0	1	1	0	1
OCPFDLNE_00756	0	1	0	0	0	1	1	2	4	0	0	2	7	0	2	2	1	0	0	1	1	0	1	2	3	1	1	0	0	0	0	0	0	0	2	0	0	0	0	0	0	0	1	0	0	0	1	1	0
OCPFDLNE_00757	1	0	0	1	0	0	0	0	0	0	0	1	4	0	0	0	1	1	0	0	0	0	0	0	0	0	0	0	0	1	0	0	0	0	0	0	0	1	0	2	0	0	0	1	0	0	0	0	0
OCPFDLNE_00758	0	0	0	0	0	0	0	1	0	0	0	0	0	0	0	0	0	0	0	0	0	0	1	0	0	0	0	0	0	0	0	0	0	0	0	0	0	0	0	0	1	0	1	0	0	0	0	0	1
OCPFDLNE_00759	0	0	0	1	1	0	0	0	0	1	0	0	1	1	0	1	0	0	0	1	0	0	0	0	1	1	0	0	1	0	0	0	0	0	1	0	0	0	0	0	0	0	0	0	0	0	0	1	0
OCPFDLNE_00760	0	1	0	0	0	0	2	1	0	1	0	1	1	1	0	0	0	1	0	1	0	0	0	0	0	0	0	0	0	0	0	1	0	0	1	1	0	2	3	0	2	0	0	0	1	1	2	0	1
OCPFDLNE_00761	1	0	0	0	0	1	0	0	0	0	1	0	2	0	5	2	2	0	0	0	0	0	0	1	2	1	2	0	2	0	0	0	2	0	1	0	3	0	1	2	1	1	1	0	1	0	0	3	2
OCPFDLNE_00762	0	1	0	0	1	0	1	0	1	2	0	3	7	0	0	3	0	1	0	0	0	0	1	1	0	1	1	0	0	0	0	0	0	0	2	0	0	0	0	0	1	0	1	0	2	0	1	4	1
OCPFDLNE_00763	0	1	0	0	0	0	0	1	0	1	1	1	0	0	0	0	0	0	0	0	0	0	0	1	0	0	0	0	0	0	0	2	0	0	2	0	0	0	0	0	0	2	1	1	1	0	1	0	0
OCPFDLNE_00764	1	0	0	0	0	0	0	0	0	0	0	0	2	1	0	0	0	0	0	0	0	0	0	0	1	0	0	0	0	0	0	1	0	0	0	0	0	0	0	0	0	0	0	0	0	0	0	1	0
OCPFDLNE_00765	0	0	0	0	0	0	0	0	0	0	0	0	1	0	1	0	1	0	0	0	0	1	0	0	0	0	0	1	0	0	0	1	0	0	0	0	0	4	0	0	0	1	1	0	0	0	1	3	2
OCPFDLNE_00766	1	0	0	0	0	0	4	0	1	0	0	3	1	1	0	0	0	2	0	1	0	1	0	1	1	0	2	0	0	0	0	0	0	0	0	2	1	0	0	0	0	0	0	1	0	0	1	2	0
OCPFDLNE_00767	0	0	0	0	0	0	0	0	0	0	0	0	2	1	0	0	0	0	0	0	0	0	1	1	0	0	0	1	0	0	0	0	0	0	0	0	0	0	0	0	0	1	0	0	0	0	0	0	0
OCPFDLNE_00768	1	0	1	0	0	2	2	0	1	4	0	2	3	1	3	6	1	1	0	1	1	3	2	0	1	2	0	0	2	0	0	3	3	1	1	0	1	1	1	4	1	1	3	1	4	0	2	4	0
OCPFDLNE_00769	1	0	0	0	0	3	1	0	0	0	0	0	3	2	1	0	0	1	0	0	1	0	1	1	2	0	0	0	0	1	2	3	3	0	0	0	0	1	1	0	2	1	2	1	0	1	1	1	0
OCPFDLNE_00770	0	4	1	1	0	0	0	0	1	2	1	0	8	0	2	9	1	5	1	2	1	1	1	0	0	1	0	0	2	1	0	2	1	1	2	0	1	1	4	0	0	2	0	2	0	2	1	2	3
OCPFDLNE_00771	2	2	0	1	1	0	0	1	3	0	3	1	6	3	1	6	1	0	0	1	0	0	1	1	0	0	0	1	0	0	2	0	4	1	1	2	1	0	0	0	0	0	2	2	1	0	0	0	0
OCPFDLNE_00772	2	1	0	0	0	1	1	1	1	1	1	0	3	1	2	1	2	2	1	0	1	0	1	5	4	2	1	1	1	1	0	0	0	1	2	3	0	3	0	1	3	2	0	1	3	0	0	1	1
OCPFDLNE_00773	0	2	0	1	1	2	0	3	1	0	2	1	3	5	1	2	1	3	1	0	0	3	0	2	0	0	1	2	0	1	0	0	2	1	1	0	2	2	1	3	1	0	4	1	0	2	0	4	0
OCPFDLNE_00774	14	20	12	6	8	22	15	18	25	14	11	26	53	26	25	22	19	22	5	23	13	13	15	8	29	8	16	23	25	17	13	30	43	14	19	28	19	21	19	30	19	14	25	46	34	15	15	75	27
OCPFDLNE_00775	8	12	2	1	5	6	2	13	7	6	5	15	11	8	8	8	10	10	2	9	4	6	8	2	10	3	3	14	8	3	8	7	27	2	3	5	12	4	7	6	6	10	12	7	10	5	13	19	4
OCPFDLNE_00776	237	207	155	100	100	237	157	272	215	125	210	307	285	48	138	322	178	35	24	226	118	168	155	344	319	220	214	256	178	108	176	203	332	79	101	175	177	138	160	175	162	122	151	178	151	87	136	430	111
OCPFDLNE_00777	204	197	145	78	85	265	117	168	132	157	131	324	286	61	140	193	173	38	22	212	90	205	163	258	228	134	205	286	263	177	145	312	361	145	217	237	251	287	189	352	322	320	355	405	274	178	266	420	180
OCPFDLNE_00778	21	13	10	4	10	9	10	12	9	14	9	31	28	7	27	21	15	2	2	20	8	16	9	21	16	14	17	35	36	20	16	24	32	14	28	31	40	38	26	38	40	44	75	58	35	29	48	59	34
OCPFDLNE_00779	13	4	3	0	0	7	2	7	7	3	4	4	10	4	3	9	9	2	2	3	5	11	4	10	8	3	7	10	4	4	7	6	2	3	3	4	9	5	6	6	7	6	5	7	7	5	3	13	5
OCPFDLNE_00780	0	0	0	1	0	6	3	2	5	4	4	5	10	5	0	4	6	8	0	1	1	0	0	2	3	0	1	1	1	0	0	2	1	1	0	1	7	1	0	3	2	0	1	1	0	0	1	1	3
OCPFDLNE_00781	283	197	109	123	133	291	186	281	329	287	204	460	539	14	206	229	243	13	46	331	166	203	197	301	334	205	252	330	259	206	175	250	456	173	178	242	309	251	299	285	292	279	226	331	241	187	203	525	237
OCPFDLNE_00782	1717	1981	1280	795	999	2226	1731	2995	2445	1759	2282	3563	3847	92	2243	3833	2457	89	716	3189	1600	2837	2693	5364	3938	3185	4859	2876	3329	1742	1587	2887	3663	1728	2511	3025	3031	3080	2707	3562	3246	3404	3307	4269	2419	1677	3054	5519	2255
OCPFDLNE_00783	22	42	27	21	20	55	38	57	62	52	34	77	133	10	56	77	46	5	4	41	21	36	23	36	43	27	22	60	37	26	35	39	72	25	31	32	52	46	40	52	56	44	34	62	59	34	38	102	38
OCPFDLNE_00784	15	18	17	9	11	46	28	92	90	58	60	111	93	69	44	57	60	46	22	79	56	82	75	114	159	68	79	18	30	19	20	25	52	12	18	24	25	19	19	54	40	44	37	49	75	23	56	78	26
OCPFDLNE_00785	4	7	5	2	4	7	9	29	38	18	12	25	18	23	14	16	18	20	7	32	10	13	22	28	52	26	24	5	5	4	5	4	7	4	2	3	7	4	4	8	2	5	10	13	7	3	5	20	5
OCPFDLNE_00786	8	1	0	3	0	3	4	14	4	6	7	21	18	10	4	5	6	9	1	5	3	3	5	6	4	7	3	1	0	1	3	3	6	0	0	3	3	0	2	4	0	2	0	4	0	5	5	5	1
OCPFDLNE_00787	3	2	1	1	0	3	0	0	1	3	1	5	14	1	3	4	0	0	0	0	4	2	2	1	2	1	0	0	0	3	1	1	2	1	2	3	2	0	1	2	3	0	4	1	0	2	5	5	2
OCPFDLNE_00788	0	1	0	0	1	1	0	5	5	1	0	2	5	2	1	6	5	2	0	0	0	3	0	2	5	0	1	0	0	0	2	1	0	0	2	2	0	0	1	2	2	3	1	2	1	3	3	3	0
OCPFDLNE_00789	10	6	1	8	7	15	10	19	25	25	16	25	47	0	22	32	21	0	5	29	12	20	20	36	26	9	29	11	13	11	2	15	25	11	11	19	24	19	14	29	24	37	31	37	30	13	32	51	14
OCPFDLNE_00790	3	1	3	1	0	0	0	5	2	4	2	2	1	0	0	3	0	0	0	2	1	2	0	2	1	4	3	3	5	0	1	0	5	0	0	2	5	2	4	0	3	1	1	4	0	2	2	4	2
OCPFDLNE_00791	8	1	1	0	2	3	0	1	0	2	0	3	3	0	1	0	3	0	0	6	1	4	3	2	6	1	3	4	5	0	1	6	7	2	0	2	1	6	1	2	1	7	0	0	3	4	3	4	5
OCPFDLNE_00792	5	3	3	4	6	2	1	2	3	4	2	4	7	0	3	1	1	0	0	4	6	1	2	9	6	3	6	7	2	1	8	2	7	1	3	7	3	5	7	3	7	5	3	1	5	3	2	11	3
OCPFDLNE_00793	9	5	7	3	2	13	4	10	14	3	8	6	20	0	7	10	10	0	1	11	4	8	14	15	14	10	10	12	18	9	8	9	10	3	6	8	7	9	11	10	12	6	14	4	5	4	4	18	10
OCPFDLNE_00794	9	8	5	3	8	10	3	8	10	3	5	14	16	1	6	13	2	0	1	4	3	3	4	8	4	5	5	11	12	5	5	4	13	4	6	6	7	5	2	9	6	3	4	7	7	4	7	11	3
OCPFDLNE_00795	2	1	5	0	0	3	4	0	8	9	6	8	13	1	10	6	8	0	0	3	3	4	3	9	7	4	12	6	4	1	1	5	4	0	4	4	9	6	6	7	5	9	4	7	6	5	5	11	3
OCPFDLNE_00796	0	0	0	0	0	0	0	0	0	0	0	0	0	0	0	0	0	0	0	0	0	0	0	0	0	0	0	0	0	0	0	0	0	0	0	0	0	0	0	0	0	0	0	2	0	0	0	0	0
OCPFDLNE_00797	0	0	0	2	0	0	0	0	0	0	0	0	3	0	0	0	0	0	0	0	0	2	0	1	1	0	0	0	0	0	0	0	0	0	0	0	0	1	1	0	0	0	0	0	0	0	0	0	1
OCPFDLNE_00798	0	0	0	0	0	0	0	0	0	0	0	0	1	0	0	0	0	0	0	0	0	0	0	0	0	1	1	0	0	0	0	0	0	0	0	0	0	0	0	1	0	0	0	4	0	0	0	0	0
OCPFDLNE_00799	1	1	0	0	0	0	0	1	1	1	0	0	7	1	2	0	0	0	0	1	0	2	0	0	0	0	1	1	2	0	0	0	1	0	2	4	1	0	1	0	2	0	1	0	0	0	0	0	2
OCPFDLNE_00800	1	2	1	0	0	1	0	0	0	0	1	1	1	0	1	3	1	0	0	0	0	0	0	2	1	3	0	0	0	0	1	0	0	0	2	0	0	0	2	0	0	1	1	2	0	0	2	0	0
OCPFDLNE_00801	0	0	0	0	0	0	0	0	0	0	0	0	0	0	0	0	0	0	0	0	0	0	0	0	0	0	0	0	0	0	0	0	0	0	0	0	0	0	0	0	0	0	0	0	0	0	0	0	0
OCPFDLNE_00802	11	13	4	7	3	5	4	6	10	5	5	14	15	0	9	9	14	0	0	2	4	5	8	19	7	3	11	8	19	11	7	7	32	8	10	8	10	6	7	4	10	23	11	11	15	9	8	45	4
OCPFDLNE_00803	2	2	3	5	0	3	1	2	6	1	4	6	8	0	7	4	1	0	1	3	3	1	0	5	3	2	5	2	3	0	3	3	3	1	2	2	3	3	7	4	1	5	3	3	4	2	7	11	3
OCPFDLNE_00804	13	12	8	4	9	15	9	18	14	14	14	34	27	0	5	29	26	0	3	6	7	13	13	20	25	9	14	18	11	15	16	21	25	9	9	18	22	9	13	18	21	17	13	31	20	7	16	32	8
OCPFDLNE_00805	3	9	7	2	5	13	12	12	3	7	11	16	18	0	8	18	8	0	1	6	6	12	15	29	6	16	25	10	10	7	8	16	14	3	5	10	17	6	12	6	3	14	16	6	9	5	7	10	8
OCPFDLNE_00806	13	15	8	7	2	7	10	10	12	7	14	27	15	0	12	9	5	0	0	8	14	6	10	14	32	12	20	15	13	9	6	8	21	5	11	3	18	14	6	10	8	7	9	17	12	6	1	20	6
OCPFDLNE_00807	11	11	10	9	4	14	10	15	8	10	12	11	22	1	6	14	7	1	6	6	4	5	7	23	25	19	16	20	3	3	9	8	14	5	2	6	6	8	5	7	5	14	7	4	6	8	7	20	6
OCPFDLNE_00808	1	2	1	0	3	2	1	4	4	3	1	6	5	5	2	6	3	1	0	5	2	3	8	7	10	6	10	1	3	0	0	3	0	1	1	2	0	2	3	3	3	3	4	7	3	1	0	5	3
OCPFDLNE_00809	1	6	4	1	1	1	2	1	7	4	6	4	7	2	3	13	7	0	5	14	7	3	9	13	7	5	13	4	4	5	5	3	4	0	7	4	3	6	5	5	7	6	2	2	4	2	5	5	4
OCPFDLNE_00810	2	5	1	3	1	7	4	6	2	4	3	7	17	3	12	14	5	5	0	10	0	5	2	11	8	3	13	2	2	3	3	2	12	3	2	5	7	6	12	1	2	2	4	2	2	2	4	1	4
OCPFDLNE_00811	16	13	11	8	7	5	6	9	18	8	8	15	19	12	9	17	13	3	3	10	6	9	17	25	16	14	8	14	19	7	11	25	22	13	9	21	20	17	15	10	11	18	21	17	11	8	14	26	6
OCPFDLNE_00812	16	28	14	6	8	19	21	18	19	15	11	34	44	15	9	27	24	18	3	28	10	10	22	31	23	15	37	28	31	27	13	21	40	15	16	16	22	28	18	21	36	33	20	19	17	15	22	36	20
OCPFDLNE_00813	29	29	17	12	20	29	14	16	18	12	17	24	17	8	10	19	21	11	6	22	14	16	15	33	20	17	21	28	23	16	17	17	32	9	15	16	18	17	16	18	20	17	20	28	15	17	9	19	11
OCPFDLNE_00814	8	10	4	4	3	12	3	7	6	4	3	2	12	5	3	5	3	2	1	5	2	5	2	12	11	0	9	11	8	6	1	10	5	2	6	7	8	9	6	6	5	7	10	12	3	2	6	13	7
OCPFDLNE_00815	17	22	11	6	4	16	11	20	12	12	17	24	15	8	10	36	17	3	0	33	16	25	30	42	46	24	57	20	16	10	4	21	34	10	16	9	13	17	15	13	20	17	21	20	12	8	11	30	16
OCPFDLNE_00816	41	29	12	19	18	41	26	55	46	30	43	64	80	8	39	58	49	5	19	81	51	49	52	94	69	42	64	33	30	20	22	24	46	15	26	39	52	25	44	33	35	38	27	52	36	21	47	89	26
OCPFDLNE_00817	6	6	7	5	4	12	3	8	8	8	11	13	9	10	9	19	21	9	1	24	5	12	21	35	19	18	30	11	11	8	6	6	6	3	5	5	14	9	7	8	7	11	16	12	10	5	14	23	8
OCPFDLNE_00818	0	1	1	0	0	1	0	15	20	0	12	18	16	0	11	14	17	0	0	20	8	15	5	13	34	10	18	0	0	0	0	0	0	1	0	0	1	0	0	0	0	1	1	2	0	0	1	7	1
OCPFDLNE_00819	0	0	0	0	1	0	0	3	5	0	8	2	9	0	1	2	3	0	3	7	0	5	1	6	9	7	7	0	0	0	0	0	0	0	0	0	0	0	0	0	0	0	0	0	0	0	0	5	0
OCPFDLNE_00820	0	1	0	0	0	0	0	0	3	0	1	0	7	0	3	1	0	0	3	12	6	2	4	9	8	6	9	0	0	0	0	0	1	0	0	0	0	0	1	0	0	0	0	0	0	0	1	2	0
OCPFDLNE_00821	1	0	0	0	0	1	0	2	0	1	5	3	5	0	2	8	1	0	4	15	9	10	4	20	25	11	14	0	0	1	0	0	0	0	0	2	0	0	0	0	2	1	1	2	1	3	0	4	0
OCPFDLNE_00822	1	1	0	0	0	1	0	0	2	1	3	3	6	0	1	2	1	0	3	9	11	3	2	23	23	11	15	1	0	0	1	1	2	0	2	0	1	2	0	1	0	1	1	1	0	1	0	4	1
OCPFDLNE_00823	13	10	8	6	12	19	10	56	75	20	48	47	87	0	43	73	47	0	25	94	47	72	48	112	167	82	79	8	14	5	12	19	13	10	12	23	25	21	27	31	20	39	37	24	21	12	23	58	10
OCPFDLNE_00824	4	5	3	1	3	2	2	4	8	6	6	14	12	0	10	13	6	0	3	17	5	9	11	15	15	6	12	2	2	3	2	3	6	3	1	6	5	2	3	6	7	2	5	12	9	2	8	15	4
OCPFDLNE_00825	0	4	2	1	0	1	3	4	7	6	2	3	10	12	2	4	0	8	1	1	1	2	1	5	5	2	3	4	1	2	2	0	3	1	1	3	1	1	0	3	3	0	2	4	1	0	1	10	1
OCPFDLNE_00826	16	18	13	8	12	30	11	36	25	23	31	48	53	12	14	61	32	7	3	37	28	18	24	57	56	43	58	17	14	16	12	22	30	23	14	22	23	28	19	25	20	26	22	38	25	29	16	48	13
OCPFDLNE_00827	159	137	106	70	77	167	114	106	134	102	104	162	238	84	144	201	155	57	28	175	97	147	120	239	230	100	213	218	201	113	114	176	229	119	136	146	175	192	132	151	194	186	182	194	115	101	146	215	113
OCPFDLNE_00828	82	53	48	33	36	77	51	63	59	53	38	65	126	96	49	87	63	60	16	84	43	54	51	98	74	39	70	65	51	30	52	51	72	33	43	33	61	50	36	48	43	47	60	35	31	36	44	70	26
OCPFDLNE_00829	6	3	6	2	1	4	4	5	7	6	9	7	19	4	9	8	5	2	4	14	6	9	7	16	15	1	9	4	5	7	4	3	3	8	10	6	1	12	6	5	4	7	8	18	4	3	4	11	6
OCPFDLNE_00830	4	4	3	5	5	16	7	21	26	16	16	34	20	11	14	9	20	9	4	11	12	14	10	12	24	10	16	6	4	7	7	5	11	3	6	8	7	5	5	3	7	4	4	11	24	5	10	18	3
OCPFDLNE_00831	11	1	6	4	6	14	10	16	29	14	21	25	30	8	15	9	13	8	2	10	16	5	10	16	42	11	9	13	5	4	6	10	21	5	10	17	15	7	11	13	16	13	9	3	17	5	9	15	8
OCPFDLNE_00832	11	8	7	9	7	26	21	28	22	37	17	42	38	3	28	26	27	10	6	39	23	20	32	41	32	24	26	9	8	8	15	19	13	7	6	12	13	5	14	14	26	21	18	32	32	19	31	63	10
OCPFDLNE_00833	0	0	0	0	0	1	1	0	0	0	1	0	2	0	0	0	0	0	0	1	1	0	1	2	1	1	1	1	0	0	0	1	0	0	0	1	0	0	0	0	3	0	0	2	0	0	0	1	1
OCPFDLNE_00834	166	159	104	94	75	192	130	161	187	133	140	231	366	224	174	338	256	206	23	241	97	175	160	249	241	122	251	197	190	142	96	191	260	127	163	190	253	255	213	173	236	246	266	363	170	140	206	367	197
OCPFDLNE_00835	227	285	228	109	168	256	237	230	284	231	234	384	667	437	349	765	504	309	51	447	198	300	305	332	410	208	405	416	422	279	179	386	444	308	409	407	482	607	439	420	564	636	800	738	378	356	580	794	458
OCPFDLNE_00836	88	71	64	41	76	72	77	73	100	100	68	121	223	78	156	190	156	67	13	123	70	101	72	102	115	58	88	116	129	90	66	125	120	98	119	125	164	223	120	128	200	177	211	224	110	146	191	238	160
OCPFDLNE_00837	119	72	90	35	52	95	75	76	105	93	95	133	266	182	185	246	199	111	14	206	93	125	134	193	182	105	149	229	250	118	110	205	189	138	186	236	240	244	204	257	289	399	389	375	226	174	304	426	253
OCPFDLNE_00838	10	5	6	2	3	6	11	9	8	10	8	16	30	11	11	14	14	15	4	21	11	23	23	18	44	13	20	6	7	14	4	3	12	5	2	5	5	10	8	6	10	7	5	11	7	6	7	17	4
OCPFDLNE_00839	18	22	4	10	9	15	11	19	27	19	17	27	31	15	17	17	22	6	3	15	10	11	12	30	23	29	23	12	18	6	16	12	28	10	13	23	24	15	14	18	25	19	12	13	25	18	19	44	15
OCPFDLNE_00840	14	21	11	8	11	17	11	28	25	17	33	43	55	20	29	55	38	15	4	36	12	29	28	48	40	19	40	18	18	15	13	22	31	11	12	25	22	31	27	32	35	35	37	34	25	22	31	64	14
OCPFDLNE_00841	239	193	115	93	100	246	103	145	122	115	129	211	237	48	169	331	173	46	59	202	123	137	136	313	224	149	225	258	249	181	157	245	306	144	194	182	191	210	170	207	231	185	230	259	147	152	203	306	162
OCPFDLNE_00842	14	6	4	6	2	13	4	9	9	8	10	21	11	2	13	26	14	0	0	10	2	17	8	27	21	10	25	12	12	5	4	10	14	6	12	8	17	10	13	9	15	12	18	21	19	10	14	45	11
OCPFDLNE_00843	4	3	1	0	2	3	3	6	6	5	8	6	9	6	5	13	7	7	2	12	3	2	5	7	21	6	6	7	5	2	3	3	3	3	3	5	9	9	9	6	9	6	9	8	6	10	6	21	7
OCPFDLNE_00844	3	3	2	3	5	7	5	7	15	8	13	15	20	9	16	10	11	4	2	12	1	6	4	11	21	7	11	5	12	2	8	4	7	4	2	7	6	3	10	11	7	5	7	10	5	0	5	30	6
OCPFDLNE_00845	2	0	1	1	1	4	3	2	4	7	3	2	19	2	2	4	4	1	2	2	1	3	1	2	5	4	1	3	3	0	2	4	3	0	1	4	3	2	2	5	5	2	1	4	10	3	2	13	6
OCPFDLNE_00846	0	0	0	0	0	0	1	1	0	1	1	1	6	0	5	1	0	0	2	1	0	3	6	2	2	3	0	1	0	0	0	3	2	1	0	1	4	1	4	3	2	2	4	2	2	2	1	2	6
OCPFDLNE_00847	513	391	265	187	200	462	347	496	434	376	311	778	713	262	344	579	359	181	86	569	337	448	356	723	537	435	613	519	446	268	308	402	673	277	351	595	566	457	413	650	642	584	653	673	524	276	523	1074	410
OCPFDLNE_00848	2	2	2	1	1	1	3	5	2	3	2	2	12	4	4	2	2	2	1	4	5	7	1	9	3	4	11	2	5	0	1	4	5	1	1	0	4	3	2	2	3	2	2	1	3	6	2	9	2
OCPFDLNE_00849	176	123	87	66	56	171	93	132	100	89	88	199	161	224	84	132	102	235	1	89	57	83	59	104	134	72	53	136	128	95	115	131	215	47	61	142	137	81	92	129	124	127	86	98	120	86	105	338	80
OCPFDLNE_00850	74	30	20	27	21	47	35	43	35	29	18	64	66	32	28	53	28	25	4	29	19	26	23	38	29	20	21	34	22	10	21	31	47	10	18	22	39	24	26	31	23	15	24	35	36	16	19	78	14
OCPFDLNE_00851	2	1	2	2	0	0	2	1	1	2	3	4	15	1	2	5	0	1	0	2	5	1	7	5	6	3	12	2	1	0	2	0	2	0	2	3	1	0	1	0	4	0	3	3	0	0	2	3	2
OCPFDLNE_00852	22	23	12	16	15	29	28	35	36	33	28	69	85	15	48	65	55	7	3	58	22	42	40	65	63	33	46	45	34	15	24	37	43	30	19	37	44	37	23	50	52	67	46	69	61	40	51	126	36
OCPFDLNE_00853	954	483	380	324	361	626	272	436	555	293	273	594	603	1047	390	461	438	690	71	487	290	328	273	485	578	333	297	658	456	300	494	442	734	170	251	431	540	352	383	370	340	308	307	385	354	185	277	879	258
OCPFDLNE_00854	7	6	3	2	3	11	6	16	12	12	6	8	24	4	9	11	18	4	1	9	5	4	4	8	13	2	7	11	10	8	16	5	7	5	5	9	12	8	6	18	5	20	11	10	15	14	10	50	8
OCPFDLNE_00855	43	32	15	23	18	35	32	50	39	36	43	60	68	8	31	39	41	10	10	46	18	41	22	46	46	30	40	43	46	17	33	26	62	27	25	30	43	35	36	41	23	42	32	40	23	18	36	69	33
OCPFDLNE_00856	0	1	0	0	1	1	0	1	3	1	0	2	4	1	0	3	0	0	0	1	1	2	3	4	5	1	3	0	0	0	0	0	4	0	0	0	1	0	0	0	0	0	1	0	4	0	0	2	0
OCPFDLNE_00857	1	1	0	1	0	1	1	0	1	5	1	2	1	1	1	2	1	0	0	1	1	2	7	2	4	4	9	0	0	0	1	3	0	0	0	2	2	3	0	1	2	1	1	0	1	1	3	3	2
OCPFDLNE_00858	0	0	1	0	0	1	0	2	1	1	5	1	8	0	1	1	2	0	1	1	0	2	5	8	6	7	8	0	1	0	0	0	1	1	0	0	0	0	0	1	0	0	0	0	1	0	2	0	0
OCPFDLNE_00859	1	2	1	1	0	0	1	1	1	1	3	1	7	0	1	3	2	0	1	3	2	2	1	7	9	7	7	1	0	0	0	0	0	2	2	1	1	2	0	1	0	1	2	1	1	1	1	3	0
OCPFDLNE_00860	0	0	0	0	0	0	0	0	1	0	0	1	3	0	0	0	0	0	0	0	3	6	0	1	2	0	2	0	0	0	0	0	0	0	0	0	1	0	0	0	1	0	0	0	0	0	1	2	0
OCPFDLNE_00861	0	3	0	1	0	0	0	0	1	0	0	0	3	0	0	1	0	0	0	1	1	2	3	2	5	1	5	1	0	0	0	3	2	0	2	0	0	2	1	0	0	0	0	1	0	0	0	1	0
OCPFDLNE_00862	2	0	1	1	0	0	1	2	0	1	1	3	6	0	1	4	0	0	2	2	0	2	0	7	4	2	3	0	1	0	0	0	9	0	1	0	1	4	3	3	5	0	2	0	0	3	1	2	1
OCPFDLNE_00863	0	0	0	0	1	0	0	0	1	0	0	1	1	0	0	1	1	0	0	0	0	0	0	0	2	0	0	0	2	0	0	0	1	0	0	0	0	1	0	1	2	1	0	1	1	2	0	0	0
OCPFDLNE_00864	0	3	1	2	2	1	2	5	5	1	3	8	11	0	2	7	8	0	0	2	4	5	2	7	7	3	7	2	2	3	1	2	6	4	0	3	3	4	6	6	14	6	8	7	12	1	7	10	0
OCPFDLNE_00865	4	4	3	4	5	11	5	10	14	8	3	18	20	0	10	13	7	0	1	9	8	9	7	20	13	3	9	3	6	2	7	11	11	3	1	9	4	5	14	6	9	5	16	7	5	5	6	24	4
OCPFDLNE_00866	22	24	14	12	10	39	35	28	29	34	19	57	99	0	41	47	43	0	7	45	28	40	38	58	42	14	46	37	42	16	18	25	46	19	17	27	31	22	32	60	34	36	44	59	26	30	42	73	25
OCPFDLNE_00867	1	2	0	0	1	6	4	3	7	6	4	7	14	0	3	5	5	0	0	6	2	2	4	7	8	3	5	2	7	2	1	3	1	2	1	6	5	2	6	3	7	2	4	3	7	2	4	14	1
OCPFDLNE_00868	5	6	2	1	4	8	7	26	29	12	18	35	16	2	14	18	11	2	6	38	18	26	28	34	45	30	38	3	5	5	4	7	13	8	5	3	11	4	8	11	11	9	4	9	20	7	8	33	8
OCPFDLNE_00869	0	1	0	2	1	2	2	5	6	0	3	7	6	1	3	2	1	1	1	2	2	0	4	4	4	2	4	4	1	1	0	3	14	3	0	2	1	3	1	2	6	5	3	1	4	2	4	5	4
OCPFDLNE_00870	24	15	17	4	16	21	19	14	21	14	13	15	23	4	18	32	25	3	1	27	3	11	13	16	21	9	15	27	32	24	21	29	25	18	24	25	20	21	10	23	30	28	28	27	21	12	28	25	26
OCPFDLNE_00871	9	6	6	6	3	9	8	6	4	7	7	11	5	12	6	12	3	4	2	11	5	2	7	17	22	13	10	11	9	5	0	11	6	4	4	6	3	7	4	6	6	8	6	4	9	4	6	12	5
OCPFDLNE_00872	2	0	0	0	0	1	0	1	2	1	2	0	2	0	1	3	0	0	0	3	1	2	0	2	2	2	3	0	0	0	0	0	0	0	0	0	0	0	0	1	0	3	0	2	2	1	0	3	0
OCPFDLNE_00873	0	0	0	0	0	0	0	1	0	2	1	1	3	0	0	0	3	0	0	5	0	2	2	2	1	1	1	0	0	0	1	0	0	0	1	0	0	0	0	0	2	1	0	4	1	0	0	1	0
OCPFDLNE_00874	12	5	1	3	0	5	14	13	11	6	8	22	17	5	13	11	11	3	0	7	7	9	4	8	16	5	3	9	6	4	4	4	14	6	4	7	9	9	11	9	6	8	2	14	8	6	14	28	17
OCPFDLNE_00875	149	132	104	48	60	174	101	137	133	112	126	182	259	70	102	213	195	47	36	150	68	124	105	178	175	103	140	198	197	103	118	207	221	94	155	140	219	214	168	197	198	201	217	249	148	139	205	334	128
OCPFDLNE_00876	120	92	50	46	40	126	63	71	86	58	75	126	146	30	64	104	82	12	15	89	49	64	55	147	111	84	124	121	124	70	62	102	174	62	66	92	97	93	86	103	102	99	103	114	83	61	94	143	69
OCPFDLNE_00877	17	10	11	5	5	17	6	17	12	18	8	19	20	10	10	12	19	6	4	11	8	19	19	29	19	12	27	18	16	5	10	22	29	4	11	9	12	11	11	14	11	8	15	21	11	6	10	19	6
OCPFDLNE_00878	7	5	5	4	3	8	7	13	7	5	9	8	10	5	7	15	7	5	5	9	6	10	11	23	26	13	23	7	9	10	10	4	17	8	4	14	6	4	11	10	11	8	11	15	11	9	4	18	9
OCPFDLNE_00879	39	12	11	10	5	8	10	18	18	11	10	31	18	16	17	14	10	6	3	14	14	11	12	11	35	13	7	22	13	7	8	10	22	4	10	9	10	11	7	11	8	11	14	12	14	5	9	12	9
OCPFDLNE_00880	54	43	45	21	29	64	41	81	77	58	60	114	133	41	52	100	85	32	10	78	37	64	55	90	130	73	72	56	57	38	55	66	98	24	36	41	67	50	69	41	44	70	65	102	90	44	55	299	50
OCPFDLNE_00881	1	0	1	2	1	1	0	0	1	0	2	2	9	5	0	2	5	2	0	4	4	1	6	4	4	0	11	4	4	1	2	1	2	1	2	1	4	1	1	4	2	3	1	3	8	1	4	5	2
OCPFDLNE_00882	15	9	8	7	4	10	8	9	16	11	8	23	24	11	6	22	14	12	1	17	7	14	10	26	16	10	25	15	23	13	6	14	24	11	13	12	20	12	10	20	19	20	18	18	15	9	11	16	13
OCPFDLNE_00883	11	17	9	6	5	19	11	12	15	12	9	27	28	19	17	21	18	7	3	22	6	12	15	26	19	15	51	21	33	17	6	14	19	12	12	5	14	16	12	25	17	13	18	14	17	6	11	33	8
OCPFDLNE_00884	357	355	230	141	153	324	163	226	210	145	199	284	330	145	192	384	221	77	39	241	126	167	160	245	272	151	217	412	407	245	171	300	520	183	241	226	304	279	227	255	278	256	290	305	182	176	220	340	190
OCPFDLNE_00885	96	104	56	49	46	120	74	142	137	111	135	210	186	90	116	189	120	62	74	175	128	208	205	474	299	216	295	129	163	73	88	131	194	67	97	105	122	107	98	151	140	116	152	126	150	76	115	285	82
OCPFDLNE_00886	0	1	2	0	1	2	1	2	3	2	3	3	11	1	4	5	4	4	1	1	3	4	0	3	6	2	4	3	0	0	1	0	3	0	2	2	4	3	2	2	3	5	4	3	2	0	1	6	1
OCPFDLNE_00887	1	0	0	0	0	0	1	0	2	0	0	0	0	0	2	0	0	0	0	0	0	0	0	2	0	0	0	1	0	0	0	0	0	1	0	0	0	0	1	0	0	2	0	1	0	0	0	0	1
OCPFDLNE_00888	0	0	0	0	0	0	1	1	4	2	0	1	5	0	0	1	0	0	0	1	0	0	2	12	0	3	3	3	0	0	1	0	0	0	0	2	1	1	1	0	1	0	0	1	0	2	1	5	0
OCPFDLNE_00889	0	0	0	0	0	0	1	0	0	0	0	0	1	0	0	0	0	0	0	0	0	0	0	0	0	0	0	0	0	0	0	0	0	0	0	0	0	0	0	0	0	0	0	0	0	0	0	0	0
OCPFDLNE_00890	0	0	0	1	0	0	0	0	2	1	0	0	2	0	0	0	0	0	0	0	0	0	0	1	0	1	0	0	1	0	0	0	0	1	0	0	1	0	0	0	1	0	0	0	0	0	0	0	0
OCPFDLNE_00891	5	8	2	4	3	9	2	8	7	8	10	9	22	1	1	9	4	8	0	11	5	6	12	27	16	7	7	1	3	5	7	3	13	1	5	5	2	6	2	4	3	5	4	9	7	7	3	11	4
OCPFDLNE_00892	2	1	1	1	1	3	1	4	2	4	2	2	8	0	4	10	2	1	3	2	5	1	7	10	9	7	15	2	2	3	2	1	5	0	5	2	5	1	0	2	1	0	3	4	1	1	4	6	1
OCPFDLNE_00893	0	0	0	0	0	0	0	1	0	0	0	0	6	0	0	0	0	0	0	1	0	0	0	0	0	0	0	0	0	0	0	0	0	0	0	0	0	0	0	0	1	0	0	0	0	0	0	0	0
OCPFDLNE_00894	0	0	0	1	0	0	0	1	1	0	0	0	9	0	1	1	0	0	1	0	0	1	0	0	0	0	3	0	0	0	1	0	2	0	0	0	1	0	1	0	1	1	1	0	0	2	0	0	0
OCPFDLNE_00895	10	7	1	5	3	6	3	10	9	5	9	13	12	0	8	10	6	0	2	10	11	6	7	18	11	9	15	5	8	3	5	12	10	5	9	10	13	7	4	5	5	5	5	5	5	4	5	21	3
OCPFDLNE_00896	35	29	29	15	18	30	27	24	33	26	34	45	84	24	53	85	53	21	13	54	21	34	51	57	62	45	69	54	43	32	25	63	62	37	40	46	42	60	43	50	55	60	68	81	46	27	47	89	51
OCPFDLNE_00897	24	14	11	5	15	18	13	31	17	17	17	34	47	12	16	26	25	8	15	15	12	28	19	69	49	23	40	26	31	9	22	12	24	10	15	30	19	25	26	29	23	18	31	32	34	10	22	49	18
OCPFDLNE_00898	0	1	0	0	1	3	0	3	4	0	1	3	9	0	3	2	1	1	0	0	0	0	0	1	0	2	1	0	0	0	0	0	2	0	1	1	0	0	0	0	1	1	0	1	0	1	1	1	0
OCPFDLNE_00899	5	1	0	2	2	2	3	6	2	3	1	9	10	0	2	3	4	1	0	8	0	2	0	4	3	3	1	6	5	1	6	3	2	2	0	5	3	2	9	8	2	2	9	1	12	6	7	33	8
OCPFDLNE_00900	2	5	3	3	7	4	7	8	9	5	1	14	17	2	7	26	5	3	3	6	7	7	4	9	8	13	10	11	5	2	7	2	24	6	2	0	7	11	6	7	4	5	6	6	4	1	9	22	4
OCPFDLNE_00901	5	5	1	1	4	1	6	9	10	9	6	16	16	2	3	14	8	3	1	9	7	9	19	34	13	8	21	2	8	4	1	4	6	2	4	4	7	3	7	8	4	10	2	5	8	1	4	10	2
OCPFDLNE_00902	4	2	1	2	3	5	1	5	2	3	1	4	14	1	6	8	2	1	1	7	3	4	5	3	7	9	10	4	3	1	3	6	12	0	2	4	5	7	1	5	5	2	2	3	1	3	2	11	4
OCPFDLNE_00903	5	1	2	1	1	5	1	2	3	4	5	6	6	2	4	3	2	0	1	2	0	3	3	9	1	4	15	5	1	2	5	4	8	0	1	2	2	1	0	2	2	0	0	6	5	3	2	3	0
OCPFDLNE_00904	0	0	1	0	1	1	0	1	0	1	1	4	4	0	1	0	1	0	0	0	3	1	1	2	2	0	2	0	1	1	0	0	0	0	1	3	1	1	1	2	0	2	0	0	2	0	0	3	1
OCPFDLNE_00905	14	14	21	4	9	45	18	27	31	58	22	28	36	7	32	13	6	7	7	28	25	11	15	29	19	12	21	13	10	13	16	12	46	5	8	10	16	15	17	26	7	15	16	18	14	12	9	36	16
OCPFDLNE_00906	35	20	17	9	22	27	25	43	34	31	29	74	88	76	36	37	42	32	3	35	17	18	26	30	42	21	21	42	30	17	25	25	37	16	25	36	45	37	35	44	45	44	44	51	63	35	45	105	33
OCPFDLNE_00907	3	0	0	0	2	0	0	0	1	2	2	0	2	0	1	2	0	0	0	0	0	0	0	1	1	1	1	0	4	0	1	2	1	1	1	2	2	3	0	3	2	0	1	1	2	1	3	2	1
OCPFDLNE_00908	2	1	0	1	1	2	2	2	0	0	3	2	11	1	1	3	0	3	1	4	1	2	0	1	5	2	2	0	1	1	5	1	0	1	1	1	1	0	0	2	0	3	7	0	1	0	2	4	3
OCPFDLNE_00909	0	0	1	0	1	0	0	1	1	0	0	0	3	0	2	1	2	0	0	1	0	0	0	1	1	0	0	1	1	0	0	0	0	0	0	0	0	1	0	0	1	2	1	0	0	1	0	0	0
OCPFDLNE_00910	6	7	7	3	9	7	13	21	10	13	14	32	34	15	20	19	17	8	4	37	13	28	22	65	47	38	53	11	8	3	13	7	18	0	6	7	8	8	12	14	14	16	8	14	21	14	21	31	7
OCPFDLNE_00911	5	9	4	5	2	15	9	21	10	10	21	21	41	10	17	33	17	7	9	23	18	25	17	39	30	13	32	12	17	7	6	13	18	5	9	5	8	11	10	18	28	14	15	18	12	10	13	25	12
OCPFDLNE_00912	11	14	4	8	10	15	9	28	21	18	21	39	49	20	20	40	26	15	7	36	14	38	37	109	32	41	81	12	5	4	6	13	19	4	8	10	7	7	9	21	17	24	22	13	18	15	23	40	17
OCPFDLNE_00913	15	16	6	8	6	12	9	12	6	4	9	18	25	3	7	14	10	3	1	8	6	19	13	18	27	21	18	12	12	6	5	11	22	4	6	6	9	4	10	9	9	9	10	5	14	6	7	17	10
OCPFDLNE_00914	1	0	0	1	0	0	1	0	0	0	0	1	2	0	1	1	0	0	0	0	0	0	0	0	0	0	0	0	0	0	0	0	0	0	0	0	0	0	0	0	0	0	0	1	0	0	0	0	0
OCPFDLNE_00915	0	0	0	0	0	0	0	1	0	1	0	0	9	1	1	0	0	0	0	0	0	0	0	0	1	0	0	0	0	0	0	0	0	0	0	0	0	0	0	0	0	0	1	0	0	0	0	0	0
OCPFDLNE_00916	2	1	0	0	0	0	1	0	0	2	0	0	5	0	0	0	1	0	0	0	0	0	0	0	0	1	2	0	2	0	0	0	0	1	0	0	0	1	1	0	0	0	0	0	0	1	0	0	0
OCPFDLNE_00917	8	5	2	3	5	10	8	8	8	15	4	10	18	2	6	10	2	3	2	12	11	9	7	15	13	11	10	8	5	7	6	8	20	5	4	7	8	2	3	12	10	4	5	13	8	7	6	18	12
OCPFDLNE_00918	0	0	0	0	0	0	0	1	1	0	1	0	7	0	0	1	2	1	0	0	1	0	0	2	5	0	0	0	1	1	0	0	3	0	1	2	1	1	2	0	0	2	0	0	1	1	0	0	0
OCPFDLNE_00919	0	0	0	0	0	1	0	0	0	0	0	0	4	0	1	0	0	0	0	1	0	1	0	0	0	1	0	0	1	0	0	0	1	0	0	1	0	0	0	1	1	0	1	1	1	0	0	0	1
OCPFDLNE_00920	0	1	1	0	1	1	0	2	2	0	2	2	7	0	1	0	1	1	0	2	0	0	0	3	2	1	0	1	2	1	2	0	1	0	1	0	1	1	0	1	4	1	0	3	3	0	1	11	0
OCPFDLNE_00921	342	615	481	210	311	589	452	538	851	505	757	844	1259	944	641	1491	970	536	98	562	389	313	461	689	530	284	486	940	791	488	400	915	1219	443	565	658	843	894	743	501	745	1015	808	1099	679	498	752	1281	489
OCPFDLNE_00922	1	0	3	2	2	4	2	1	4	3	5	4	14	1	6	8	9	4	4	5	1	4	6	17	7	5	9	6	3	4	0	5	3	2	3	4	8	0	3	5	3	2	1	1	6	2	4	11	1
OCPFDLNE_00923	0	0	1	0	0	1	0	0	1	1	1	0	7	0	3	2	2	0	0	0	0	1	2	0	0	1	2	0	1	0	1	2	1	0	0	1	0	2	0	0	2	1	3	0	0	0	2	0	2
OCPFDLNE_00924	35	41	19	17	15	47	21	31	23	30	22	45	50	13	20	31	23	7	4	32	14	28	25	31	32	11	31	46	39	24	13	36	43	22	20	28	37	49	15	59	63	38	38	27	33	32	32	40	18
OCPFDLNE_00925	8	10	11	5	5	10	2	8	3	4	3	12	9	1	8	6	12	1	1	9	5	6	4	7	15	11	7	12	11	7	10	16	20	1	11	8	10	11	12	11	6	10	13	12	9	7	5	9	9
OCPFDLNE_00926	26	15	15	10	18	24	15	30	25	29	19	53	45	14	19	28	16	4	2	36	11	7	11	19	20	7	14	21	21	9	12	8	23	10	9	19	22	14	18	13	16	20	15	17	13	9	19	43	13
OCPFDLNE_00927	0	1	2	0	1	0	0	0	1	0	0	0	5	0	1	3	3	0	0	1	0	0	2	0	0	2	0	2	1	2	0	5	0	0	1	2	2	0	1	0	0	2	1	0	0	2	1	2	0
OCPFDLNE_00928	1	0	0	1	2	2	3	0	4	1	2	3	7	1	1	2	4	0	0	0	2	2	1	1	3	4	2	8	3	4	3	5	3	5	1	6	2	5	3	7	11	6	3	6	4	2	4	8	0
OCPFDLNE_00929	0	0	0	0	1	1	0	0	0	0	0	0	0	1	0	0	0	0	0	0	0	0	0	0	0	0	0	0	0	0	0	0	0	0	0	1	0	0	0	1	1	0	1	0	0	3	1	1	0
OCPFDLNE_00930	1	1	2	1	0	3	0	0	0	0	0	0	0	0	0	0	0	0	0	0	0	0	0	0	1	0	0	0	0	0	0	2	0	0	1	0	3	3	3	0	0	0	2	1	1	1	0	0	3
OCPFDLNE_00931	1	0	0	0	0	0	0	0	0	0	0	1	13	0	0	1	1	0	0	0	1	1	0	1	2	0	1	3	2	0	0	0	1	0	0	1	1	1	0	2	2	3	1	2	1	1	1	1	1
OCPFDLNE_00932	0	1	0	0	0	0	1	1	0	0	0	0	1	4	0	1	0	1	0	0	1	0	1	0	2	0	2	0	1	1	0	0	0	2	0	4	0	1	0	4	1	2	2	0	3	5	1	3	1
OCPFDLNE_00933	2	0	0	0	0	1	0	2	1	2	2	2	5	0	1	0	3	2	0	0	0	6	2	1	1	0	1	1	0	1	0	0	2	2	2	1	5	3	0	0	2	1	5	8	0	3	3	3	1
OCPFDLNE_00934	2	3	1	0	0	5	1	2	1	1	0	0	6	2	1	1	0	1	0	3	2	0	2	0	1	1	1	2	2	1	1	2	2	2	1	2	1	1	0	0	1	2	1	1	1	0	0	2	0
OCPFDLNE_00935	35	23	24	24	20	25	37	42	40	37	27	88	96	25	64	55	56	18	9	70	25	36	29	66	49	24	44	38	29	21	33	45	44	31	46	54	54	42	39	108	85	85	91	88	90	55	116	126	57
OCPFDLNE_00936	0	0	0	0	0	1	0	0	0	0	0	0	6	4	1	1	0	0	0	0	1	0	0	1	0	0	0	0	0	1	0	0	0	0	0	0	0	0	0	0	0	0	0	0	0	0	0	4	2
OCPFDLNE_00937	3	2	1	2	1	2	5	4	2	4	1	5	14	5	4	7	8	3	1	7	2	5	2	8	6	6	6	3	6	2	1	7	8	0	4	7	6	3	1	8	6	8	9	8	10	8	9	15	4
OCPFDLNE_00938	17	16	9	2	2	9	10	13	8	15	7	14	41	11	19	29	21	9	0	17	9	21	18	11	22	7	14	15	13	2	8	13	12	13	17	20	16	13	17	17	17	17	35	30	11	21	26	31	13
OCPFDLNE_00939	2	5	4	1	3	6	4	9	5	5	1	5	15	6	11	21	12	3	1	15	12	11	11	15	20	10	15	9	4	2	2	8	9	8	7	11	8	10	6	12	16	10	5	14	15	6	15	16	5
OCPFDLNE_00940	1	4	0	0	3	3	1	0	2	3	2	3	9	0	2	11	7	1	0	3	5	0	2	12	4	2	7	6	8	1	1	5	3	5	4	3	3	6	1	5	3	8	3	11	5	1	10	2	6
OCPFDLNE_00941	4	7	6	5	4	12	4	7	20	3	11	8	30	5	10	23	18	3	2	27	8	25	16	30	36	16	23	7	20	13	3	17	11	7	12	12	9	10	9	11	6	17	25	19	14	7	11	29	8
OCPFDLNE_00942	88	69	73	29	33	100	80	139	236	171	172	204	230	121	190	177	168	89	68	290	189	150	146	180	335	211	165	84	76	68	121	97	84	65	86	107	144	92	123	158	111	105	124	126	190	129	151	347	123
OCPFDLNE_00943	43	25	11	8	15	37	29	36	25	29	29	60	86	13	40	71	37	15	12	61	32	26	23	44	60	46	35	34	22	9	12	20	51	20	16	29	40	21	36	41	34	39	29	67	59	35	36	115	33
OCPFDLNE_00944	38	25	27	14	23	38	58	90	102	91	69	150	202	88	134	207	156	51	31	186	83	134	148	238	184	122	178	46	70	30	31	55	87	48	68	70	86	94	71	125	109	140	135	138	105	54	101	265	94
OCPFDLNE_00945	16	16	12	6	16	22	27	24	24	22	25	46	70	43	30	51	40	34	4	53	20	46	38	56	50	29	50	26	16	14	10	26	40	18	18	26	36	26	23	35	33	50	47	22	22	31	27	66	34
OCPFDLNE_00946	48	43	30	18	25	36	39	52	62	63	58	78	107	80	69	144	85	57	22	69	61	76	75	145	106	79	131	59	72	35	48	68	57	41	58	64	68	74	55	69	69	81	94	104	40	51	89	139	53
OCPFDLNE_00947	112	120	66	46	39	81	76	96	91	95	97	146	211	126	143	253	195	103	22	199	99	172	179	358	275	153	290	144	171	103	88	158	140	96	131	155	181	156	150	165	195	243	193	260	137	115	164	352	126
OCPFDLNE_00948	44	23	24	11	30	51	40	38	38	37	30	68	77	8	41	50	57	7	10	44	30	31	36	27	37	30	18	48	57	25	30	43	60	25	40	27	50	46	45	67	54	46	59	48	81	34	61	98	42
OCPFDLNE_00949	47	40	31	15	29	48	33	43	38	57	35	66	88	5	47	49	43	8	5	54	19	46	28	63	64	28	53	60	58	48	38	72	78	44	53	52	63	74	74	59	70	55	61	82	72	51	83	98	53
OCPFDLNE_00950	125	124	71	41	57	102	73	98	103	90	84	136	181	75	97	208	124	66	26	120	62	108	116	173	167	124	141	117	164	113	80	174	200	108	157	103	168	202	136	164	212	209	224	191	138	121	166	264	140
OCPFDLNE_00951	69	44	39	27	45	59	50	73	57	62	52	83	150	31	50	65	67	30	18	66	42	49	43	80	84	38	87	62	47	40	41	58	98	28	45	48	56	46	43	46	68	66	68	59	46	35	43	119	42
OCPFDLNE_00952	6	6	3	2	2	2	3	3	5	4	6	10	24	8	10	10	9	3	1	18	6	12	14	20	13	9	18	10	18	2	7	10	13	3	8	8	8	13	3	7	6	9	12	13	4	4	5	8	3
OCPFDLNE_00953	41	29	21	12	18	37	30	34	39	37	33	56	97	15	38	87	55	13	8	66	27	53	55	108	86	59	60	48	39	14	16	43	65	21	32	34	54	45	33	40	36	56	57	83	51	45	64	95	29
OCPFDLNE_00954	2	5	5	2	2	6	2	6	8	1	4	7	13	10	10	10	13	4	2	2	5	2	7	16	5	6	6	2	3	7	7	3	6	1	2	5	6	5	2	6	6	3	7	4	2	2	8	13	5
OCPFDLNE_00957	1	0	0	2	0	1	0	0	0	0	1	0	3	2	3	0	0	0	0	0	2	2	2	1	3	2	2	0	1	0	1	0	2	0	1	0	1	0	1	0	2	0	0	1	2	1	0	0	2
OCPFDLNE_00958	0	0	0	0	0	2	2	0	1	0	1	2	3	2	0	4	2	0	0	1	3	0	2	4	3	4	4	0	2	1	0	0	0	1	0	0	0	1	0	3	0	0	0	0	0	2	1	2	0
OCPFDLNE_00959	3	2	4	1	1	4	4	9	4	1	6	20	18	6	3	7	5	4	1	11	7	8	9	5	31	5	10	3	8	1	2	0	5	3	1	2	7	1	4	1	5	8	2	4	5	2	5	25	2
OCPFDLNE_00960	1	0	2	0	2	2	0	21	16	13	11	25	19	2	2	8	16	3	4	22	6	11	9	38	38	11	35	2	2	0	0	0	0	0	0	3	0	0	2	3	0	0	0	0	0	1	0	2	1
OCPFDLNE_00961	29	30	29	14	17	38	26	47	59	32	52	55	99	20	56	113	51	24	16	93	36	66	58	107	116	63	112	39	54	26	22	52	53	32	49	32	46	34	42	68	48	59	69	61	38	40	65	78	43
OCPFDLNE_00964	1	0	0	0	1	0	0	3	3	1	3	2	4	0	6	8	2	0	0	5	1	1	8	1	2	2	0	0	1	0	1	0	0	0	0	0	1	1	0	1	0	0	0	0	3	0	1	1	0
OCPFDLNE_00965	30	26	13	15	5	25	18	34	22	20	17	54	44	10	19	13	28	3	3	42	13	26	20	30	51	15	33	28	26	9	19	21	54	10	19	18	26	29	26	32	32	41	29	41	53	22	23	83	35
OCPFDLNE_00966	33	36	24	15	20	41	27	27	33	24	43	31	77	28	28	77	41	12	10	80	27	30	78	81	75	47	53	40	62	29	31	61	66	38	41	44	47	54	38	45	71	81	81	73	51	34	65	87	38
OCPFDLNE_00967	111	124	117	63	88	107	85	105	118	83	118	136	222	125	129	300	166	90	23	205	77	161	184	259	232	146	233	206	261	134	90	238	252	133	161	152	183	221	201	143	214	224	216	230	154	114	190	268	134
OCPFDLNE_00968	106	129	76	44	57	107	53	92	107	85	90	119	156	96	72	160	130	48	26	137	88	84	109	247	182	125	148	123	105	85	84	125	178	79	85	98	104	80	82	93	100	84	93	116	76	70	95	167	75
OCPFDLNE_00969	3	1	2	1	3	4	6	11	6	11	11	15	22	0	4	12	6	0	2	18	10	15	10	13	35	9	13	3	10	2	5	5	12	3	1	4	8	5	2	4	6	13	16	15	14	3	7	20	11
OCPFDLNE_00970	40	29	22	10	22	31	28	24	29	25	24	33	79	15	25	41	60	7	6	34	15	16	24	31	40	27	25	69	69	37	48	70	50	30	53	55	60	64	60	65	69	59	72	57	64	38	46	111	44
OCPFDLNE_00971	39	55	44	19	29	71	38	54	40	56	28	80	89	15	42	79	66	10	8	44	33	39	74	85	64	36	65	88	77	47	34	89	106	46	34	77	65	70	74	59	81	84	77	85	63	42	61	104	44
OCPFDLNE_00972	478	366	227	209	200	385	274	328	288	228	202	490	451	141	166	180	217	86	22	257	143	169	135	268	178	142	196	311	283	151	239	216	471	134	147	156	201	168	157	234	189	198	182	193	182	134	213	381	125
OCPFDLNE_00973	34	38	19	12	15	38	16	22	25	19	17	45	52	54	20	39	29	43	7	21	12	38	15	30	47	28	35	45	22	20	20	42	93	27	23	15	22	30	21	27	22	27	25	34	17	24	14	44	22
OCPFDLNE_00974	1392	1713	1301	687	934	1957	1396	1628	1519	1458	1352	2569	2883	454	1498	1572	1634	325	178	1548	639	1379	967	1663	1470	909	1550	2685	2363	1576	1255	2728	3205	1596	2052	2006	2733	2931	1909	2746	2836	3046	3144	3235	2262	1972	2652	3628	2080
OCPFDLNE_00975	15	11	7	10	13	6	7	9	6	8	8	17	13	3	8	29	7	1	1	5	8	6	8	4	13	6	8	13	18	4	19	9	14	11	13	19	21	14	17	23	20	26	25	19	24	10	16	25	10
OCPFDLNE_00976	42	41	33	19	21	32	29	36	29	23	16	62	93	12	42	76	33	3	3	32	14	36	28	49	49	26	41	82	85	40	38	67	94	34	76	65	77	116	69	105	96	99	98	111	87	56	58	112	44
OCPFDLNE_00977	26	29	16	16	4	20	9	8	10	10	9	23	44	4	15	36	24	2	3	18	7	21	12	26	24	18	31	46	42	24	21	44	29	23	32	41	35	35	29	40	35	59	42	53	42	29	18	59	25
OCPFDLNE_00978	99	73	50	49	61	68	54	60	58	53	53	98	127	4	77	125	80	5	17	81	33	83	54	139	92	69	111	104	84	58	74	158	119	71	96	111	114	103	103	88	98	118	132	118	86	54	97	145	58
OCPFDLNE_00979	19	21	12	6	6	15	14	16	11	17	13	23	40	9	19	34	25	1	3	26	11	32	11	43	32	19	38	27	22	25	10	31	20	25	21	39	39	46	22	36	54	39	51	63	36	23	37	40	22
OCPFDLNE_00980	272	275	182	97	107	202	148	163	161	147	140	220	167	64	140	173	110	36	25	184	128	200	154	218	184	163	196	362	399	285	267	388	408	178	256	300	262	266	181	231	265	232	285	241	213	134	191	240	115
OCPFDLNE_00981	1	5	3	1	0	6	4	4	3	1	6	3	13	0	3	9	5	0	0	7	3	4	4	8	7	2	6	3	6	4	5	7	12	4	4	4	5	5	2	5	5	7	7	5	4	7	2	20	6
OCPFDLNE_00982	11	6	4	4	2	6	5	7	3	1	5	8	25	0	8	4	6	0	3	10	1	8	5	10	9	7	16	3	4	3	5	11	6	3	6	7	10	5	3	7	12	6	1	7	10	6	5	19	1
OCPFDLNE_00983	58	63	32	28	32	84	68	109	122	84	88	168	189	108	71	181	130	78	29	123	83	115	113	314	242	138	220	75	76	33	33	69	119	21	42	68	73	37	61	89	64	94	70	92	116	40	90	253	58
OCPFDLNE_00984	16	17	17	7	9	30	14	13	20	16	11	20	23	19	14	36	21	9	5	31	18	16	20	34	20	25	20	20	27	20	12	33	37	9	27	20	30	31	19	28	32	22	38	39	26	17	25	45	18
OCPFDLNE_00985	38	50	32	12	22	35	10	28	18	35	23	30	39	17	32	51	25	10	10	34	20	21	37	62	28	24	52	48	55	49	26	65	59	30	39	27	42	71	28	42	54	40	46	49	33	34	32	59	27
OCPFDLNE_00986	10	4	9	10	4	15	4	8	10	10	9	12	18	8	2	15	9	10	3	8	8	8	6	23	10	8	11	18	13	7	8	2	24	10	5	5	11	15	10	2	11	8	11	6	5	4	12	10	4
OCPFDLNE_00987	107	129	72	38	54	134	112	171	125	138	121	269	358	314	141	262	221	220	17	173	82	165	139	194	221	128	171	146	147	97	88	166	227	106	136	151	173	152	145	181	242	240	191	249	192	119	157	371	126
OCPFDLNE_00988	12	12	3	8	4	7	7	8	6	5	3	14	16	0	14	5	15	0	0	8	5	10	8	11	10	5	15	8	12	5	4	6	14	1	4	17	12	8	5	15	15	21	6	16	15	14	11	37	13
OCPFDLNE_00989	57	23	22	18	19	44	36	51	62	48	32	96	87	25	28	38	34	31	1	44	22	30	29	39	57	25	29	54	36	27	38	23	57	15	34	43	42	23	30	61	50	40	32	50	70	28	41	140	42
OCPFDLNE_00990	140	91	79	52	50	122	68	118	102	97	81	182	145	20	79	136	97	13	10	102	55	74	81	114	144	53	81	145	128	83	97	132	141	65	96	136	104	98	85	130	145	121	129	131	107	59	104	213	75
OCPFDLNE_00991	170	166	88	74	80	143	79	145	118	113	78	178	169	17	102	121	89	15	4	119	64	77	62	117	136	60	73	145	151	100	100	155	183	47	89	106	134	110	120	117	116	98	110	126	101	58	101	191	62
OCPFDLNE_00992	40	25	20	13	15	29	29	32	36	21	25	39	78	38	32	45	44	16	4	42	13	39	19	54	63	27	45	34	22	15	25	30	51	10	19	24	19	15	19	26	28	31	25	28	29	12	29	84	24
OCPFDLNE_00993	22	21	5	8	11	26	31	44	40	48	21	34	78	0	30	48	36	0	2	40	18	33	26	55	43	32	38	29	33	24	12	29	36	15	18	19	25	28	23	37	36	25	40	32	32	23	30	93	19
OCPFDLNE_00995	24	13	7	4	8	15	25	18	27	26	16	41	41	16	20	30	28	15	3	24	13	26	37	68	45	35	48	19	19	9	22	26	11	16	13	18	17	17	22	32	21	28	24	26	44	20	29	49	10
OCPFDLNE_00996	14	6	7	3	2	5	7	13	14	4	11	20	20	12	16	16	20	5	7	14	8	13	17	45	35	13	21	18	11	9	9	18	19	7	7	21	12	23	9	33	19	22	30	24	11	10	19	31	10
OCPFDLNE_00997	42	33	32	14	17	58	28	50	46	39	40	71	82	12	61	87	61	5	21	57	44	49	55	107	86	63	71	57	49	30	45	37	65	22	30	49	54	53	55	65	94	65	63	68	63	32	64	135	41
OCPFDLNE_00998	2	7	11	1	3	72	13	30	31	45	17	24	16	27	30	7	11	50	6	11	12	7	11	8	11	8	3	14	19	9	37	14	9	4	5	28	18	7	9	10	7	5	7	5	13	13	14	27	11
OCPFDLNE_00999	5	4	7	3	2	6	3	8	15	5	5	14	14	0	7	16	6	0	0	9	7	9	3	14	13	11	15	9	5	2	3	10	8	1	5	6	3	9	6	4	10	11	12	6	9	6	7	10	2
OCPFDLNE_01000	4	2	0	2	0	3	2	4	7	3	6	9	15	0	3	5	8	2	3	12	2	13	13	18	14	8	2	2	2	3	2	10	11	3	4	3	3	5	5	5	4	2	5	7	10	5	5	5	3
OCPFDLNE_01001	6	4	6	0	2	3	2	5	7	7	6	17	17	1	5	9	7	1	3	10	7	8	5	19	15	7	5	9	5	7	3	6	5	6	5	8	12	6	12	5	7	4	6	5	5	10	6	7	2
OCPFDLNE_01002	12	7	4	8	2	16	18	12	26	15	22	30	30	0	18	36	17	2	6	18	9	22	16	26	38	17	21	9	11	10	16	11	23	5	9	30	14	15	8	12	15	14	22	35	13	11	19	33	7
OCPFDLNE_01003	2578	1747	1296	1236	1456	2717	1891	3090	3916	2624	2261	4749	5648	2319	3301	3531	3465	1995	187	1753	1136	1098	1043	1514	1796	835	873	2479	2014	1281	2425	2017	3453	1069	1344	2384	3083	1879	2452	2468	2057	2375	1944	2422	2885	1516	2041	7243	1589
OCPFDLNE_01004	69	65	44	41	41	149	161	202	221	166	156	330	399	61	141	184	192	78	27	199	118	104	108	157	184	91	110	126	103	60	87	88	180	62	88	121	152	91	131	228	191	167	139	228	229	131	162	483	173
OCPFDLNE_01005	5	10	8	1	11	11	14	20	28	20	20	47	47	21	35	53	40	10	8	36	22	29	39	46	75	41	49	25	11	7	19	16	19	11	25	24	20	39	24	45	60	53	57	92	57	50	50	118	46
OCPFDLNE_01006	3	3	6	2	1	11	9	21	14	15	12	19	18	14	11	12	9	3	5	7	10	6	11	26	21	6	9	11	3	7	7	4	15	3	4	5	9	8	8	11	5	12	12	13	10	17	7	36	14
OCPFDLNE_01007	3	12	3	1	2	14	10	14	4	5	9	14	23	4	10	20	11	4	1	19	7	9	17	17	24	18	23	6	22	8	7	7	7	12	13	8	5	11	11	10	17	10	15	12	8	8	8	16	4
OCPFDLNE_01008	5	4	2	1	2	1	3	6	3	0	2	5	9	1	6	3	5	2	3	10	4	8	3	8	9	1	6	5	7	0	1	2	4	1	2	1	1	5	3	3	3	5	4	5	1	1	2	9	5
OCPFDLNE_01009	7	8	5	6	5	14	13	12	10	18	12	29	26	52	13	22	18	31	1	23	10	14	9	28	29	12	25	10	20	17	4	10	19	14	15	13	8	15	8	24	11	19	23	28	26	21	15	31	21
OCPFDLNE_01010	4	4	2	3	3	7	8	3	14	4	8	12	16	6	9	11	9	8	3	13	5	20	17	23	23	14	21	12	6	5	4	7	5	4	5	3	6	9	7	18	3	7	13	13	5	7	13	11	5
OCPFDLNE_01011	2	3	3	4	1	4	5	8	10	2	7	9	5	11	5	11	3	4	2	13	5	9	6	14	18	12	14	3	4	1	3	4	2	2	4	0	0	2	2	4	0	7	4	4	11	5	3	6	0
OCPFDLNE_01012	4	10	3	3	3	5	10	14	11	10	12	28	18	4	6	21	10	0	3	9	14	18	13	33	30	9	26	2	4	4	6	9	18	5	2	5	12	6	5	9	7	9	6	16	10	4	9	35	6
OCPFDLNE_01013	445	272	266	108	168	801	370	622	529	632	321	704	646	106	321	230	235	132	48	462	365	287	102	240	404	197	128	324	180	147	371	157	421	113	129	182	301	125	178	264	103	104	128	119	123	135	85	294	158
OCPFDLNE_01014	231	129	113	127	111	258	212	391	430	291	289	743	391	388	156	185	180	186	60	195	210	229	327	651	438	352	498	246	235	143	199	197	479	73	90	185	161	151	194	208	273	316	173	355	624	176	223	746	120
OCPFDLNE_01015	608	577	462	300	337	867	891	1498	1804	1469	1074	2853	1323	904	689	691	610	484	215	972	1183	912	1623	3074	2074	1607	2342	915	769	603	778	968	1750	333	425	708	725	592	682	679	882	893	610	1209	2139	522	737	2397	532
OCPFDLNE_01016	637	679	439	300	344	701	393	520	484	344	382	614	313	231	195	304	220	143	40	353	178	241	186	445	274	239	307	822	758	474	342	708	848	309	504	482	477	512	372	404	428	370	427	396	226	196	293	469	227
OCPFDLNE_01017	214	215	162	81	86	232	127	128	173	133	111	167	125	67	88	113	106	46	12	110	62	97	85	162	81	69	109	292	330	158	122	297	280	138	187	183	197	182	140	138	174	129	180	169	99	72	111	211	76
OCPFDLNE_01018	211	200	138	106	85	253	123	165	163	134	122	184	143	90	65	117	116	61	13	128	64	114	72	145	158	69	126	253	208	133	97	188	321	118	124	136	152	152	116	107	120	116	140	144	85	66	107	155	68
OCPFDLNE_01019	27	27	14	10	16	30	19	23	25	22	23	29	39	6	17	39	24	2	3	38	12	18	36	59	80	36	47	40	28	18	8	17	43	15	16	23	20	20	24	27	15	19	27	16	20	15	26	47	19
OCPFDLNE_01020	0	12	1	2	1	3	5	5	2	2	11	13	9	2	6	13	10	0	0	4	0	7	5	12	14	10	19	1	7	4	1	5	3	1	6	4	4	4	3	5	4	3	8	6	6	3	3	8	2
OCPFDLNE_01021	19	7	6	8	6	17	11	21	16	18	16	29	28	0	17	15	9	3	5	17	15	13	12	18	17	14	23	8	8	6	13	9	17	4	9	18	22	9	19	9	10	12	7	8	11	10	8	20	14
OCPFDLNE_01022	28	25	21	20	16	28	36	44	44	40	30	62	59	35	38	94	68	44	3	40	18	30	28	30	38	27	44	27	29	29	13	46	61	20	23	29	42	33	34	46	56	52	31	63	48	20	37	84	40
OCPFDLNE_01023	26	37	28	18	18	43	23	44	43	29	55	66	93	54	53	94	53	44	7	70	24	35	32	46	46	24	46	42	32	35	13	44	79	34	31	34	47	62	33	48	56	42	58	54	47	33	35	62	33
OCPFDLNE_01024	408	453	314	171	172	471	279	388	298	297	269	483	720	338	309	423	340	233	55	467	177	455	310	486	487	302	402	844	625	389	412	626	911	359	465	549	605	548	434	600	688	677	660	575	473	368	510	811	392
OCPFDLNE_01025	12	9	5	4	5	13	8	6	11	13	4	15	21	10	11	9	12	11	1	8	3	6	12	18	16	9	11	16	16	9	9	19	19	5	13	12	16	20	9	25	20	23	8	18	15	10	14	22	9
OCPFDLNE_01026	9	8	5	8	7	8	8	10	5	5	4	15	21	6	3	7	14	3	2	10	4	6	7	4	12	12	13	7	12	8	2	9	9	9	7	10	9	17	10	12	18	16	19	25	15	12	14	32	12
OCPFDLNE_01027	15	6	4	7	9	12	11	16	29	11	6	29	25	7	19	27	18	9	6	40	17	29	23	32	55	18	45	19	18	8	9	24	24	11	14	14	19	20	27	22	33	40	22	26	26	19	32	40	12
OCPFDLNE_01028	14	18	5	4	7	8	14	11	17	13	10	26	35	13	35	29	24	10	7	26	13	24	29	30	27	25	46	20	20	10	13	23	24	10	18	17	18	24	14	23	19	24	23	24	17	18	23	46	13
OCPFDLNE_01029	34	24	9	3	7	22	17	17	21	21	10	43	50	11	30	36	35	12	4	33	12	25	24	49	42	36	39	43	35	19	18	39	29	16	27	32	34	33	40	44	36	45	38	38	27	23	29	81	28
OCPFDLNE_01030	41	31	21	11	21	42	36	60	69	34	46	78	105	29	46	82	63	15	13	70	42	53	44	91	135	62	66	34	58	34	25	46	59	16	32	57	48	31	45	60	51	51	52	43	54	25	38	159	42
OCPFDLNE_01031	452	446	258	174	167	427	235	395	356	280	313	501	514	1224	245	581	438	964	73	433	238	359	310	990	597	387	738	577	533	349	323	477	776	278	378	479	506	482	465	452	480	568	519	617	458	306	372	818	280
OCPFDLNE_01032	26	25	18	21	20	29	28	50	44	43	44	63	82	233	57	97	55	138	7	57	33	42	48	85	53	24	76	38	44	27	35	48	39	26	38	57	52	54	40	65	68	78	79	37	41	27	72	86	30
OCPFDLNE_01033	78	86	58	36	49	66	82	72	67	66	69	156	174	518	85	182	152	324	14	126	51	73	92	177	110	66	157	140	102	70	53	88	157	72	112	114	138	133	103	145	198	159	191	190	99	102	102	187	109
OCPFDLNE_01034	145	162	103	86	65	140	111	143	184	145	152	232	305	1306	183	393	220	887	22	283	138	180	244	445	348	189	446	262	290	153	105	289	377	154	280	203	273	327	258	304	373	358	480	405	289	231	307	414	222
OCPFDLNE_01035	24	19	11	15	19	25	24	15	38	16	24	48	57	167	32	55	22	87	2	41	14	21	37	66	33	51	44	18	47	10	17	30	18	15	28	28	29	31	19	52	45	69	52	47	61	17	36	54	20
OCPFDLNE_01036	1	8	3	0	5	3	3	5	6	7	2	11	10	3	6	12	3	1	0	9	6	4	6	11	19	9	13	6	10	3	5	10	6	6	3	8	3	6	8	8	8	4	5	12	9	4	7	17	4
OCPFDLNE_01037	5	2	2	1	0	4	0	6	10	9	13	6	12	12	7	8	7	6	4	18	7	6	6	8	10	8	16	8	4	2	1	3	1	5	3	1	6	3	4	4	8	2	4	5	4	3	1	10	6
OCPFDLNE_01038	10	9	7	4	2	12	14	11	22	18	13	15	30	20	21	35	26	8	5	35	9	30	43	60	52	31	53	11	15	7	9	13	27	6	8	6	16	17	12	17	17	26	22	21	21	7	16	22	10
OCPFDLNE_01039	27	18	15	9	15	21	27	40	34	37	25	72	62	16	23	62	41	12	4	42	21	39	39	78	52	27	45	28	9	9	19	13	51	11	19	14	28	22	27	29	33	25	22	32	36	20	17	52	23
OCPFDLNE_01040	1	1	0	0	0	0	0	1	1	2	0	1	5	1	3	0	3	0	2	1	0	0	1	1	1	1	0	1	0	0	2	1	0	0	0	0	2	2	0	1	0	1	0	1	2	0	1	1	0
OCPFDLNE_01041	1	0	2	1	0	1	0	1	1	1	2	2	4	1	0	1	3	0	0	0	0	0	1	0	2	0	0	0	0	0	0	0	3	0	0	0	0	0	0	0	1	2	2	1	0	0	1	0	0
OCPFDLNE_01042	27	16	10	8	6	33	13	24	19	25	18	53	37	3	13	45	26	3	4	23	17	16	13	50	29	23	43	29	15	19	10	23	45	12	12	20	22	23	22	31	21	28	33	30	19	15	25	33	24
OCPFDLNE_01043	269	216	135	135	123	241	163	264	306	223	205	384	538	159	301	452	355	105	26	298	175	265	207	355	364	231	297	287	298	178	230	305	356	147	208	305	310	282	220	309	301	375	317	405	309	182	301	543	219
OCPFDLNE_01044	54	48	25	12	16	59	25	56	57	31	34	75	74	31	39	69	60	29	5	43	25	48	29	60	71	35	47	61	45	22	32	45	58	19	45	37	52	30	40	47	44	45	28	61	32	23	38	80	27
OCPFDLNE_01045	10	5	8	4	6	15	16	13	13	26	8	24	25	5	13	13	15	5	1	11	7	10	11	13	9	7	12	14	14	16	9	18	41	9	13	21	11	16	14	24	33	26	20	30	33	22	24	50	32
OCPFDLNE_01046	5	9	4	6	6	14	5	11	6	11	9	10	14	1	13	15	9	2	1	12	8	5	7	13	6	10	17	14	16	12	8	9	14	10	10	13	17	10	17	21	13	13	20	21	26	19	16	43	9
OCPFDLNE_01047	11	18	6	15	8	14	11	15	10	12	10	31	25	2	13	31	18	6	3	12	6	12	20	26	17	13	35	18	26	16	18	22	44	10	13	29	14	31	24	44	34	32	31	30	29	20	24	45	12
OCPFDLNE_01048	10	8	9	3	7	6	5	9	11	10	11	18	22	10	15	15	10	5	5	10	8	9	7	15	17	7	17	12	31	14	7	14	39	8	12	26	17	10	19	16	18	22	12	24	12	10	22	20	9
OCPFDLNE_01049	11	14	10	4	6	20	17	16	24	22	18	24	52	12	12	55	28	5	7	31	17	10	24	40	29	21	54	13	17	12	12	16	31	8	5	14	20	12	13	10	13	20	21	37	15	18	17	36	10
OCPFDLNE_01050	9	3	8	1	5	6	9	7	13	19	4	25	31	12	11	12	18	1	0	15	6	5	1	14	22	7	10	6	5	2	9	12	19	4	7	4	9	4	2	10	17	5	12	6	15	6	13	34	7
OCPFDLNE_01051	6	0	2	1	2	4	2	3	1	3	3	5	18	0	2	4	2	1	2	3	1	2	2	1	3	0	5	5	1	2	1	2	2	2	3	0	2	4	1	2	2	1	2	6	1	2	0	9	0
OCPFDLNE_01052	0	2	2	1	0	0	2	4	10	7	4	14	28	3	4	5	9	0	4	7	4	7	4	14	7	11	29	0	1	1	2	2	4	2	0	2	1	2	1	1	4	3	2	9	4	4	2	3	4
OCPFDLNE_01053	6	6	4	0	2	6	4	9	9	9	15	15	23	24	12	18	13	13	2	10	10	19	14	20	24	14	36	5	8	4	2	10	11	5	10	1	3	8	8	10	13	7	17	11	11	10	8	16	6
OCPFDLNE_01054	15	8	14	1	4	11	6	8	15	9	20	10	50	0	21	27	26	2	2	18	9	17	19	26	27	10	41	8	17	5	6	12	20	8	8	12	10	21	10	5	11	18	13	11	10	16	10	18	9
OCPFDLNE_01055	373	364	244	261	290	704	556	622	411	502	338	1043	1251	384	356	335	338	439	5	282	139	154	117	82	221	60	101	320	208	154	254	209	596	152	185	275	410	234	303	347	255	222	226	249	251	231	257	690	270
OCPFDLNE_01056	27	19	17	12	14	22	10	13	14	9	8	38	25	27	13	8	16	10	3	28	13	23	11	27	31	15	13	10	20	10	17	11	23	16	13	17	30	16	18	33	18	17	17	27	31	13	25	43	17
OCPFDLNE_01057	0	0	0	1	0	0	0	0	0	0	0	0	2	0	0	1	1	0	0	1	1	1	2	2	5	1	3	0	1	0	0	0	0	0	3	0	0	0	0	0	0	1	0	0	1	2	1	0	0
OCPFDLNE_01058	2566	2690	1608	841	897	2053	869	2939	2744	906	2803	2082	2551	5909	1555	4419	1791	2766	3017	12106	7932	11556	6294	29643	20634	13699	15635	2014	1619	994	870	1719	2271	644	891	912	1134	996	699	972	962	910	859	903	587	476	565	1294	435
OCPFDLNE_01059	1	2	2	0	0	2	4	5	5	4	2	13	8	3	1	5	2	1	0	12	1	9	9	11	11	9	8	0	1	0	1	2	1	1	0	0	3	1	0	1	2	4	0	1	1	0	2	4	1
OCPFDLNE_01060	6	7	5	4	5	4	12	20	11	18	30	30	25	6	19	28	12	5	4	32	15	27	33	30	32	30	39	11	6	7	9	12	18	5	6	12	18	8	13	19	24	24	13	18	17	13	10	32	8
OCPFDLNE_01061	1	3	1	1	2	0	6	4	7	3	5	4	20	4	0	15	7	5	0	6	2	4	9	13	9	4	9	2	2	1	0	8	6	1	4	1	1	5	5	1	2	2	3	2	7	2	6	12	0
OCPFDLNE_01062	19	21	12	6	8	27	19	33	42	36	22	60	60	30	31	30	36	30	6	27	47	18	15	27	47	23	22	14	8	12	19	16	20	15	9	8	43	17	21	20	11	25	10	19	26	12	13	59	20
OCPFDLNE_01063	120	89	68	56	59	143	81	165	123	93	101	201	338	125	111	229	136	95	10	150	72	101	105	147	167	97	139	121	84	54	85	95	150	40	76	75	85	85	89	118	91	99	121	132	99	82	108	243	101
OCPFDLNE_01064	413	552	328	154	197	653	398	648	500	428	421	868	1146	317	448	763	640	253	77	560	278	487	418	770	896	434	715	652	504	324	315	503	872	285	370	402	548	429	442	558	513	475	522	659	390	321	322	1005	383
OCPFDLNE_01065	1	1	1	0	1	1	0	1	2	1	1	3	4	0	0	2	0	0	0	1	2	0	1	5	0	1	3	2	4	0	2	1	2	1	0	1	0	0	1	0	0	2	2	6	0	0	1	1	0
OCPFDLNE_01066	1	0	1	0	1	1	0	0	0	1	0	0	1	0	1	0	0	0	0	0	0	0	0	0	0	0	0	0	1	1	1	0	0	0	0	1	0	0	1	0	1	0	0	0	1	0	0	0	0
OCPFDLNE_01067	9	2	2	2	6	14	13	9	15	8	5	11	24	8	19	19	12	7	5	27	12	21	28	33	31	10	23	17	3	0	3	3	8	6	3	4	6	9	12	9	20	11	19	23	24	12	14	47	7
OCPFDLNE_01068	7	10	4	3	2	11	10	14	13	10	13	13	39	16	14	20	26	12	7	26	20	18	28	21	29	15	25	7	4	5	3	12	12	5	8	3	9	10	7	10	11	15	17	20	12	1	6	18	12
OCPFDLNE_01069	6	3	2	1	0	8	9	12	13	5	10	7	30	2	9	17	4	2	2	11	12	13	16	33	33	20	40	6	4	3	1	9	2	5	5	6	5	9	6	9	9	16	13	5	13	6	8	12	6
OCPFDLNE_01070	0	0	0	0	0	2	0	0	0	2	0	3	0	0	0	1	0	0	0	1	1	0	1	0	0	0	0	2	0	0	0	2	0	0	0	0	0	0	1	0	0	0	0	0	0	0	0	0	0
OCPFDLNE_01071	11	8	4	4	3	16	14	19	22	26	15	27	35	14	20	13	8	19	2	7	9	3	3	13	14	9	0	8	5	4	6	12	13	4	8	6	12	12	16	11	8	12	5	10	8	4	7	39	11
OCPFDLNE_01072	9	8	6	7	3	29	16	40	34	21	37	46	53	29	18	31	15	20	1	38	23	28	21	41	59	18	30	16	10	7	5	5	21	3	9	9	21	13	12	17	19	26	17	33	30	15	24	51	9
OCPFDLNE_01073	26	30	19	17	24	54	40	72	62	48	56	85	122	65	59	95	47	33	28	95	58	98	79	161	162	103	133	58	42	32	27	46	61	18	36	48	45	49	42	47	60	62	60	69	67	45	58	105	44
OCPFDLNE_01074	38	47	22	16	21	31	34	70	51	40	46	97	117	27	57	80	64	21	25	89	41	83	73	126	132	95	113	46	24	20	21	26	42	19	31	28	35	43	24	52	42	50	45	60	47	29	43	99	38
OCPFDLNE_01075	22	19	7	5	13	25	19	46	25	24	30	58	83	17	27	52	52	26	2	43	27	38	26	50	64	29	38	27	23	15	14	28	32	6	25	19	21	32	23	29	33	24	37	48	36	34	30	61	29
OCPFDLNE_01076	38	28	14	11	9	31	12	21	35	37	33	46	45	20	27	64	33	5	26	68	35	44	66	173	96	75	100	31	29	10	12	31	42	13	30	25	35	24	32	41	28	30	49	36	37	19	32	78	19
OCPFDLNE_01077	5	9	2	6	5	6	10	10	13	14	15	15	41	2	21	40	42	2	0	42	8	51	27	24	45	19	20	8	14	6	6	8	12	9	4	12	21	12	8	14	19	19	27	31	21	7	16	31	24
OCPFDLNE_01078	3	11	3	3	3	10	3	6	7	5	7	16	26	2	19	53	16	0	4	25	9	24	22	33	44	18	27	13	6	6	2	8	14	4	8	3	7	11	5	14	15	16	15	21	11	7	11	27	10
OCPFDLNE_01079	16	15	12	5	7	19	8	17	14	23	9	24	42	0	25	42	27	0	5	27	15	32	27	55	49	27	44	21	20	14	10	17	38	17	11	16	23	16	14	24	19	23	18	29	23	20	14	44	16
OCPFDLNE_01080	14	16	14	5	7	15	12	18	39	25	19	20	33	7	15	23	22	5	1	17	14	11	12	25	28	20	14	23	21	10	21	18	22	9	5	20	14	16	23	25	22	17	18	19	18	15	17	48	18
OCPFDLNE_01081	2	4	3	1	2	7	5	11	6	7	4	11	12	3	2	12	8	2	1	7	2	8	5	9	10	4	6	6	4	4	3	8	9	1	1	4	5	4	6	9	10	11	7	5	19	4	3	25	6
OCPFDLNE_01082	16	12	9	9	9	22	15	14	26	18	15	28	40	9	20	33	16	15	3	24	8	17	24	50	25	13	26	19	10	5	4	30	15	12	17	6	23	23	17	25	18	34	22	20	24	15	20	37	18
OCPFDLNE_01083	9	9	9	10	8	22	40	75	49	41	45	88	55	25	27	63	38	15	10	65	50	58	90	121	79	59	127	15	16	12	8	17	32	12	11	22	17	16	20	26	40	55	33	57	86	21	40	55	18
OCPFDLNE_01084	47	45	29	19	19	49	59	80	77	80	55	154	145	100	85	105	93	60	17	104	61	90	134	224	149	149	194	72	71	31	48	70	56	52	41	56	90	70	84	110	93	111	76	103	115	63	105	229	75
OCPFDLNE_01085	19	17	13	10	20	20	27	43	57	38	41	65	120	58	61	87	67	40	4	53	30	32	68	73	64	58	94	33	36	33	26	49	36	19	41	37	51	38	38	47	67	50	55	45	32	34	46	80	25
OCPFDLNE_01086	25	27	27	11	27	46	29	63	65	49	59	93	131	103	63	105	86	90	17	82	52	55	94	145	119	89	121	41	43	28	18	45	59	24	36	41	45	58	45	41	52	66	56	76	36	43	52	88	33
OCPFDLNE_01087	2	4	3	0	0	6	0	2	5	1	3	5	10	7	2	11	9	2	0	2	4	5	3	2	9	3	5	2	1	2	2	1	4	0	0	4	4	0	1	0	1	1	5	4	6	6	2	15	1
OCPFDLNE_01088	4	2	1	2	0	5	3	1	1	4	4	5	10	2	6	5	4	4	0	6	8	5	3	7	8	8	7	7	6	1	2	4	7	1	2	5	8	11	5	7	5	7	7	8	8	6	7	8	7
OCPFDLNE_01089	5	8	5	8	2	15	8	14	17	15	14	12	31	20	15	28	30	5	3	36	18	27	30	59	56	33	52	12	11	8	5	15	13	6	7	10	11	14	11	16	17	14	7	18	16	4	16	42	10
OCPFDLNE_01090	92	108	72	41	39	142	106	161	152	107	134	229	302	65	122	252	171	79	85	371	243	334	423	719	416	277	603	137	99	89	78	145	140	87	76	95	130	102	80	147	137	130	136	186	111	107	116	237	88
OCPFDLNE_01091	8	12	4	3	2	14	7	12	10	9	13	24	22	9	17	27	15	4	1	33	23	30	38	69	47	19	40	14	11	7	3	17	21	3	9	5	7	9	10	10	18	14	12	22	24	8	7	35	8
OCPFDLNE_01092	10	3	5	6	8	12	11	10	22	18	19	22	22	11	34	30	19	4	4	9	9	13	11	23	22	9	19	11	12	11	7	11	15	6	8	10	14	15	9	26	8	12	11	16	17	8	6	19	4
OCPFDLNE_01093	2	3	1	1	0	3	5	16	13	8	15	17	20	5	3	25	23	3	3	18	13	15	8	28	34	8	13	7	1	0	3	4	3	2	3	3	3	1	8	10	7	4	2	11	14	3	5	35	8
OCPFDLNE_01094	2	2	1	0	0	1	1	2	5	2	2	4	10	4	1	2	3	2	1	6	0	0	0	5	2	2	3	4	3	2	1	3	0	3	2	3	0	2	1	2	2	2	2	4	2	1	2	3	1
OCPFDLNE_01095	1	1	2	1	1	1	0	0	0	0	1	4	7	0	2	0	0	1	1	4	0	2	2	1	1	0	1	0	3	0	1	1	1	1	1	0	2	3	0	0	0	2	3	1	1	0	1	0	0
OCPFDLNE_01096	4	0	1	0	1	2	0	0	2	2	2	0	5	2	1	2	0	1	0	0	0	0	2	2	0	0	1	1	1	1	1	2	2	1	2	2	2	0	0	1	0	1	1	1	2	0	2	4	1
OCPFDLNE_01097	1	2	3	1	0	3	0	2	3	0	0	1	2	2	1	1	3	1	0	3	3	3	1	0	1	1	3	3	2	1	0	2	4	1	4	2	2	0	3	2	2	3	2	1	4	0	0	2	2
OCPFDLNE_01098	1	3	0	2	2	2	4	4	2	0	1	2	6	0	2	4	1	3	2	5	4	2	3	5	5	2	4	5	6	1	0	2	2	2	2	1	5	2	2	2	3	3	2	4	5	1	2	5	2
OCPFDLNE_01099	6	3	3	4	5	7	4	3	7	4	4	3	15	5	6	10	7	2	0	8	2	6	6	5	10	6	13	2	9	3	7	4	9	4	4	6	3	8	4	13	4	6	5	10	1	5	3	12	1
OCPFDLNE_01100	1	0	0	0	0	0	0	3	0	3	1	3	5	0	1	5	5	0	0	0	1	2	2	1	6	1	1	0	0	0	0	0	0	0	0	1	0	1	0	1	1	0	2	0	0	0	0	7	0
OCPFDLNE_01101	8	4	5	8	4	13	8	12	12	3	6	15	20	5	4	15	8	5	3	9	5	8	9	23	9	17	18	3	4	7	2	2	8	4	3	4	8	4	8	7	5	7	1	8	3	4	8	15	3
OCPFDLNE_01102	5	11	4	5	1	8	12	6	5	14	23	9	22	13	8	21	22	8	4	20	11	21	19	41	23	28	30	11	10	8	5	13	14	7	11	11	9	15	14	9	19	12	12	13	7	9	7	11	11
OCPFDLNE_01103	1	4	2	2	8	11	8	10	13	3	13	11	25	14	8	21	10	5	5	17	6	18	19	43	26	13	32	12	9	2	1	4	7	3	8	10	5	8	9	6	12	11	15	9	15	6	8	17	7
OCPFDLNE_01104	1	0	0	0	1	0	0	2	3	3	4	2	13	4	2	6	3	0	0	3	1	3	1	3	7	3	6	1	0	0	1	3	0	0	4	0	3	2	1	1	1	4	2	6	0	1	3	12	3
OCPFDLNE_01105	30	29	9	15	17	22	25	44	41	27	19	50	62	31	30	70	42	11	13	60	38	71	59	67	119	48	74	33	36	15	18	31	48	25	28	22	34	28	43	61	65	68	67	66	39	39	42	109	35
OCPFDLNE_01106	19	11	12	10	4	20	14	20	17	17	11	27	24	11	17	34	19	10	6	27	12	17	24	49	57	13	28	19	34	18	14	26	25	8	27	11	26	21	19	42	41	31	56	31	22	25	34	73	21
OCPFDLNE_01107	17	12	8	7	8	21	10	23	21	8	19	21	19	3	17	29	16	2	5	15	13	13	18	21	21	22	24	15	26	16	7	26	20	13	21	23	22	19	32	40	30	26	24	39	30	16	27	80	27
OCPFDLNE_01108	10	10	1	3	0	6	8	8	5	6	10	14	9	4	10	8	4	4	1	2	2	4	3	8	10	1	6	8	12	8	8	10	13	3	9	8	15	11	19	8	6	16	16	9	12	8	26	34	8
OCPFDLNE_01109	16	22	12	12	6	21	12	18	24	20	12	23	44	9	15	37	26	6	4	29	13	15	17	18	28	18	34	41	21	17	14	23	29	18	38	18	33	36	22	31	28	33	30	32	26	17	21	52	20
OCPFDLNE_01110	20	30	24	6	14	38	24	27	29	15	17	24	55	35	34	29	31	37	7	48	12	33	20	48	46	25	29	41	45	34	22	36	49	11	29	32	43	49	43	26	34	46	26	39	29	26	29	68	30
OCPFDLNE_01111	8	11	10	6	10	32	20	10	13	16	16	24	22	41	19	15	21	34	4	9	14	8	7	5	19	5	6	16	15	18	7	27	20	11	15	15	25	19	15	11	12	21	16	9	10	12	5	27	17
OCPFDLNE_01112	83	91	42	35	34	100	72	87	75	72	59	118	170	21	64	168	90	16	15	89	51	97	65	144	134	95	130	89	88	66	49	94	102	45	59	79	102	92	86	121	96	90	90	108	103	70	101	180	64
OCPFDLNE_01113	1	0	1	1	0	3	2	5	1	3	5	10	8	1	3	8	1	0	1	5	3	2	5	16	12	12	16	2	2	2	3	1	1	1	3	1	2	2	2	2	2	2	5	2	4	3	3	4	1
OCPFDLNE_01114	9	9	5	11	10	26	22	56	56	22	31	74	98	48	25	49	54	38	5	42	28	41	30	51	74	35	46	19	13	16	12	10	42	11	11	23	16	11	16	34	30	27	23	37	35	23	34	83	23
OCPFDLNE_01115	204	200	121	81	114	133	119	147	177	129	130	192	268	583	164	285	200	305	16	259	94	172	147	223	312	117	238	234	266	141	97	276	291	118	136	143	164	182	143	175	193	184	222	220	159	123	171	345	147
OCPFDLNE_01116	275	304	165	102	157	225	200	256	215	207	186	317	355	346	166	334	251	209	14	280	117	244	196	287	294	148	306	316	271	157	129	260	278	136	190	147	232	227	151	169	213	184	214	238	161	154	168	317	152
OCPFDLNE_01117	659	743	514	229	335	481	354	355	464	368	364	501	677	1408	394	788	553	735	52	684	294	486	440	693	817	362	693	877	764	535	364	786	823	386	509	422	554	649	479	491	621	680	714	668	365	387	469	916	443
OCPFDLNE_01118	425	546	349	162	233	401	304	337	289	289	272	412	525	535	241	522	327	457	33	422	167	315	239	399	543	223	414	523	437	286	190	455	681	220	271	230	399	402	299	299	305	313	341	370	227	250	198	532	249
OCPFDLNE_01119	17	10	14	8	11	19	17	27	36	26	17	48	44	32	18	40	27	18	7	24	20	7	15	24	24	16	17	20	6	12	7	21	22	12	7	20	4	10	11	13	10	10	8	15	20	8	14	39	14
OCPFDLNE_01120	357	345	227	138	137	396	276	414	333	280	304	442	497	208	242	465	278	156	48	385	201	367	298	578	415	315	486	469	406	254	248	436	537	216	299	305	360	356	246	340	402	407	456	437	327	241	298	508	204
OCPFDLNE_01121	159	129	87	47	46	145	79	125	119	94	93	158	159	114	98	121	82	70	34	118	63	91	95	167	147	133	123	190	188	125	137	147	188	82	102	134	149	132	86	160	129	182	171	157	119	65	116	162	78
OCPFDLNE_01122	256	188	146	88	103	262	160	235	226	209	148	269	319	14	166	205	188	10	35	186	170	161	135	231	204	157	204	246	240	125	158	215	253	115	148	174	219	206	152	202	190	164	205	176	147	104	173	252	126
OCPFDLNE_01123	3	2	2	2	4	5	5	4	4	3	3	5	8	0	4	3	6	0	0	6	1	2	2	4	3	2	2	5	2	0	5	7	3	6	2	4	3	2	3	3	6	8	8	5	8	1	8	6	6
OCPFDLNE_01124	15	12	6	7	6	15	15	10	19	18	10	22	17	0	8	20	16	0	0	11	6	10	11	28	14	10	11	13	17	9	14	12	45	5	10	15	15	13	14	17	15	17	15	22	13	11	10	36	8
OCPFDLNE_01125	2	4	2	0	1	2	1	1	2	1	1	5	8	0	0	2	5	0	0	2	2	4	3	5	2	4	2	1	3	2	2	2	6	2	4	1	0	2	3	3	4	4	2	1	3	1	3	2	0
OCPFDLNE_01126	0	1	0	0	0	0	0	0	0	0	0	1	2	0	0	1	0	0	0	0	0	0	0	1	0	0	0	0	0	0	0	0	0	0	0	0	0	0	0	0	0	0	0	1	1	0	0	0	0
OCPFDLNE_01127	3	12	6	2	2	11	9	12	8	14	10	27	36	6	11	28	16	4	3	13	6	14	12	28	19	8	19	3	10	1	6	5	10	7	8	9	5	16	4	4	6	9	12	12	17	8	11	32	3
OCPFDLNE_01128	2	3	1	0	0	1	6	4	7	5	4	3	14	1	10	13	10	0	1	12	1	7	14	5	6	5	7	2	4	2	0	2	0	3	5	2	6	6	4	3	5	3	4	9	3	0	10	6	3
OCPFDLNE_01129	46	19	15	15	19	13	21	36	40	32	36	70	70	25	30	37	29	33	9	51	39	56	29	70	91	57	46	24	23	17	27	24	39	13	20	20	24	17	22	32	26	36	30	36	29	11	31	65	23
OCPFDLNE_01130	74	77	73	31	46	127	177	241	263	241	220	393	721	221	350	696	491	109	42	241	209	206	255	489	258	180	357	132	126	101	65	195	220	90	107	141	180	192	136	205	224	276	229	417	283	140	284	541	225
OCPFDLNE_01131	4653	3696	2878	2007	2028	4689	3600	5250	4929	4711	3600	7314	5227	2	3676	3627	3736	0	272	3581	2910	2714	2333	3207	3830	1829	1997	4345	4841	2610	5198	3211	6638	1867	2699	4507	3292	3165	2969	6921	4892	4735	4263	4052	5492	3529	4504	10888	3234
OCPFDLNE_01132	19	10	8	7	15	33	13	33	34	23	15	38	75	24	27	25	26	31	3	12	13	8	6	11	12	8	5	14	7	3	14	2	31	5	6	18	16	8	6	16	9	7	4	6	18	15	11	29	8
OCPFDLNE_01133	44	18	16	18	32	45	45	73	109	72	75	141	205	79	92	129	75	59	15	53	57	30	34	53	61	35	25	17	15	8	26	17	25	19	27	31	48	31	31	47	26	33	33	33	27	23	52	133	37
OCPFDLNE_01134	15	14	8	3	6	14	21	33	23	21	23	36	46	5	30	39	29	2	12	47	20	41	30	80	71	48	74	21	12	10	9	18	18	7	4	15	14	9	16	16	24	14	30	22	25	10	13	53	12
OCPFDLNE_01135	95	125	75	36	61	135	103	151	176	157	159	284	332	120	187	390	221	74	59	291	195	246	326	624	369	229	464	171	145	122	97	193	224	106	130	135	183	152	143	163	165	183	240	247	169	152	158	355	172
OCPFDLNE_01136	3	3	0	0	0	3	2	4	5	3	3	7	16	2	5	8	12	1	2	10	4	4	8	7	12	3	12	2	1	2	2	1	1	3	0	5	1	3	5	4	7	12	14	5	7	3	4	19	5
OCPFDLNE_01137	7	5	1	0	4	8	5	10	6	8	4	10	17	0	11	10	15	0	0	4	4	5	7	15	13	13	10	3	10	2	6	6	13	3	9	9	9	5	8	11	9	5	11	11	11	9	7	25	3
OCPFDLNE_01138	15	14	8	8	0	12	7	19	14	17	11	32	37	0	18	39	24	0	1	11	16	10	8	17	24	13	23	10	16	4	5	4	12	6	5	14	15	11	13	10	10	9	19	12	14	5	12	24	10
OCPFDLNE_01139	16	26	12	9	18	47	37	50	61	44	49	85	91	0	47	82	53	0	10	66	33	73	43	79	96	41	116	29	24	37	15	37	36	19	36	36	60	45	28	56	52	54	66	58	57	24	55	97	32
OCPFDLNE_01140	12	8	10	4	8	11	12	35	24	41	32	46	59	0	31	53	31	0	12	41	36	33	49	89	73	32	69	25	19	8	12	11	25	12	8	20	24	19	15	28	28	27	28	22	43	19	29	69	21
OCPFDLNE_01141	3	9	4	4	8	11	19	29	36	15	15	35	46	0	23	51	34	0	1	35	19	25	21	43	47	18	26	14	8	6	14	16	23	9	5	7	12	11	16	15	19	24	16	15	28	9	15	48	15
OCPFDLNE_01142	23	11	8	8	2	16	11	20	25	25	26	30	53	0	24	50	36	0	2	28	18	30	16	63	50	22	44	27	22	5	10	18	29	11	17	16	20	16	16	31	28	16	22	36	16	20	20	35	17
OCPFDLNE_01143	36	38	29	22	27	66	42	70	72	72	45	131	175	0	84	148	135	0	6	69	49	50	54	76	130	36	54	74	71	36	41	77	109	37	56	79	87	63	90	110	106	122	120	110	135	72	103	291	65
OCPFDLNE_01144	64	52	34	18	28	59	50	56	74	43	58	119	128	0	88	159	124	0	2	81	36	56	49	92	125	35	79	78	69	57	73	71	115	41	70	82	89	78	77	97	94	111	96	149	96	55	100	283	68
OCPFDLNE_01145	34	32	23	8	15	27	28	40	58	41	45	59	119	0	67	86	68	0	4	50	34	43	45	66	62	24	30	51	45	32	36	43	57	31	50	58	72	40	53	77	61	55	59	62	82	37	49	162	33
OCPFDLNE_01146	81	54	34	31	28	83	57	106	117	62	83	153	175	0	92	167	118	0	12	74	73	89	74	164	145	74	112	97	82	60	74	85	102	32	71	86	93	82	83	112	86	106	86	113	104	51	103	266	47
OCPFDLNE_01147	49	48	35	23	23	60	59	90	94	36	61	124	135	0	77	164	95	0	24	79	43	61	52	128	128	56	98	84	84	36	48	76	82	39	56	65	84	64	74	73	72	69	79	82	76	32	71	212	42
OCPFDLNE_01148	26	22	14	11	13	29	27	34	39	35	25	45	71	0	40	53	49	0	3	47	26	44	32	81	75	52	49	43	47	20	28	28	45	31	26	30	40	43	40	30	42	53	60	57	51	32	28	95	33
OCPFDLNE_01149	49	33	22	18	26	47	38	84	76	54	44	124	129	0	72	99	74	0	1	55	30	48	28	62	116	27	44	44	43	36	25	57	70	21	37	73	67	47	56	74	86	91	78	95	92	41	65	244	57
OCPFDLNE_01150	101	111	65	50	44	95	128	191	240	155	159	281	389	0	164	324	225	0	26	181	122	183	115	248	360	141	151	120	119	57	87	111	191	54	87	115	168	131	124	141	154	191	177	185	172	115	110	440	79
OCPFDLNE_01151	22	16	15	12	14	12	12	28	22	18	12	32	78	0	29	32	23	0	2	33	23	20	17	30	42	9	17	26	26	15	27	29	31	11	26	30	32	38	37	50	37	58	50	54	42	28	26	114	18
OCPFDLNE_01152	4	7	5	1	1	4	5	6	4	5	7	15	17	0	18	17	8	0	0	7	6	8	12	9	20	6	7	7	4	1	7	5	14	3	8	7	4	6	9	10	16	14	10	15	8	9	11	16	6
OCPFDLNE_01153	19	18	13	7	9	12	18	29	42	23	34	28	76	0	38	56	36	0	1	31	26	36	22	29	65	20	28	32	24	13	18	27	30	19	29	22	38	24	23	43	41	46	43	28	26	21	29	90	22
OCPFDLNE_01154	24	27	10	10	11	18	14	38	36	23	24	38	61	0	33	50	39	0	1	33	23	31	19	40	61	12	18	26	23	11	33	19	32	14	25	20	37	23	27	26	29	25	30	25	29	23	32	81	20
OCPFDLNE_01155	22	37	17	11	15	40	39	64	60	61	50	82	106	23	55	113	74	19	5	61	32	68	50	54	95	26	63	40	35	24	19	49	50	24	33	47	74	36	49	64	89	67	65	80	63	40	64	148	49
OCPFDLNE_01156	75	52	40	25	20	45	49	89	82	63	76	108	116	57	77	172	91	34	16	112	45	97	75	122	171	67	138	95	59	58	48	93	111	46	54	76	85	75	65	75	93	104	102	113	62	52	68	147	65
OCPFDLNE_01157	25	13	6	5	9	29	11	29	31	35	26	27	38	8	21	61	23	5	3	32	15	17	18	19	35	29	35	25	14	19	23	25	36	15	22	20	26	21	15	26	26	15	19	19	23	19	18	52	12
OCPFDLNE_01158	14	16	9	6	4	13	5	13	16	16	17	26	42	12	26	29	21	10	3	33	15	14	18	45	36	8	26	19	15	8	16	21	13	11	10	21	17	15	15	19	20	13	15	29	20	21	23	41	16
OCPFDLNE_01159	22	20	11	3	5	31	23	40	42	24	33	58	84	89	42	73	53	67	11	44	27	46	34	67	77	46	81	23	20	15	16	39	45	7	22	27	32	30	22	35	44	35	24	67	31	32	37	78	32
OCPFDLNE_01160	42	34	32	11	18	39	40	46	80	48	39	83	90	0	82	96	75	0	8	45	40	29	47	114	75	40	49	61	53	12	37	40	51	34	35	67	77	57	61	80	66	88	83	82	92	29	66	191	42
OCPFDLNE_01161	0	1	1	1	0	0	0	0	0	0	0	0	1	0	3	0	2	0	0	0	0	0	0	2	0	0	0	0	1	0	3	0	0	0	0	0	0	0	0	0	0	0	0	0	1	0	0	1	0
OCPFDLNE_01162	0	0	0	0	0	0	1	0	2	0	0	0	0	0	0	0	0	0	0	0	0	0	0	0	1	0	0	0	0	0	0	0	0	0	0	0	0	0	0	0	0	0	0	1	0	0	0	0	0
OCPFDLNE_01163	0	0	0	0	0	0	0	0	0	0	0	0	4	0	1	1	0	0	0	0	1	2	2	1	0	0	0	1	1	0	0	1	0	0	1	0	0	0	0	0	0	0	0	0	0	0	0	0	0
OCPFDLNE_01164	0	0	0	1	0	0	0	0	0	1	0	2	2	0	0	1	1	0	0	0	1	0	1	1	4	0	1	0	0	0	0	0	0	0	1	0	0	0	1	1	1	1	0	1	0	1	0	1	0
OCPFDLNE_01165	1	0	0	2	0	0	0	0	0	1	0	0	1	3	0	2	0	0	0	0	0	0	1	0	1	1	0	4	0	0	0	0	3	0	0	1	0	0	1	0	0	0	0	2	0	0	0	1	2
OCPFDLNE_01166	0	0	0	0	0	0	0	4	4	0	0	3	4	2	1	2	1	0	0	0	1	2	2	5	8	0	3	1	0	2	2	1	1	2	3	1	1	1	1	3	0	3	0	2	3	2	2	4	0
OCPFDLNE_01167	3	2	0	1	0	1	1	0	3	1	1	0	2	1	0	0	1	2	1	1	1	4	2	2	2	1	1	0	3	2	0	3	1	0	2	1	1	3	1	1	1	1	3	1	0	1	1	6	0
OCPFDLNE_01168	0	0	1	1	1	2	1	2	0	1	0	3	3	6	1	2	2	1	0	0	0	2	2	0	2	1	0	4	1	1	0	0	6	0	0	2	6	1	0	1	2	0	2	0	3	0	1	1	0
OCPFDLNE_01169	5	2	3	4	4	2	6	3	7	5	4	9	14	0	10	5	6	0	0	6	3	1	5	4	11	4	7	6	6	3	4	2	17	0	3	6	7	3	5	10	4	3	5	5	6	3	5	9	3
OCPFDLNE_01170	8	7	1	3	2	4	6	5	10	8	10	5	6	22	9	8	10	12	0	11	4	7	1	5	12	6	4	7	9	7	5	6	10	5	2	7	4	7	3	16	5	7	7	10	5	4	7	23	4
OCPFDLNE_01171	5	2	3	4	0	8	2	4	4	5	8	15	10	17	1	3	5	11	1	5	3	2	3	4	9	5	3	3	6	2	5	4	10	4	2	1	5	4	2	5	5	4	4	5	7	5	6	18	2
OCPFDLNE_01172	1	0	0	1	1	0	3	0	0	0	0	3	4	1	0	4	0	5	0	1	0	1	1	1	0	1	3	0	0	0	2	0	1	0	1	0	2	2	0	1	1	3	2	1	1	0	2	2	0
OCPFDLNE_01173	0	0	0	1	0	0	0	0	0	0	0	0	1	2	0	2	1	0	0	0	1	0	0	1	1	0	0	0	2	0	0	1	0	0	0	1	1	1	0	2	1	1	0	1	0	2	0	1	0
OCPFDLNE_01174	0	1	1	0	0	0	0	0	0	1	0	0	0	1	1	1	0	1	0	0	0	1	0	1	1	1	0	0	0	0	0	0	3	0	0	2	0	1	0	1	0	0	3	1	3	0	0	6	1
OCPFDLNE_01175	0	0	0	3	0	0	1	5	0	1	1	5	13	0	2	7	2	0	0	4	2	2	2	0	2	1	3	4	1	0	2	1	0	1	3	0	1	2	8	4	1	4	2	6	3	3	1	3	0
OCPFDLNE_01176	2	3	1	1	1	1	0	1	0	3	3	0	8	1	5	2	2	0	0	2	0	2	1	1	3	3	3	2	4	4	1	7	0	0	0	3	2	0	1	3	0	2	3	1	0	1	3	7	3
OCPFDLNE_01177	0	0	0	0	0	0	0	0	0	0	0	0	0	0	0	0	0	0	0	1	0	0	0	0	0	0	2	0	0	0	0	0	0	0	0	0	0	0	0	0	0	0	0	0	0	0	0	0	0
OCPFDLNE_01178	21	11	10	6	7	17	14	12	14	13	4	17	32	4	20	15	16	5	1	22	20	6	8	25	32	17	24	30	23	11	17	26	30	8	29	29	26	17	29	37	37	35	29	27	52	23	31	94	5
OCPFDLNE_01179	49	23	21	5	10	33	24	42	35	31	19	56	80	9	32	38	57	15	4	30	22	36	30	45	63	24	48	33	55	41	39	38	53	17	50	76	50	32	54	44	57	63	49	60	52	49	40	132	33
OCPFDLNE_01180	0	6	1	0	0	1	0	0	3	5	1	9	21	0	2	10	8	1	2	2	2	2	3	7	5	6	8	3	1	1	4	3	13	4	7	3	3	5	3	5	4	9	1	5	8	8	4	7	2
OCPFDLNE_01181	3	3	3	0	2	3	0	5	5	4	3	7	5	1	3	4	6	1	2	8	2	8	7	18	11	5	5	3	2	2	1	0	4	1	3	5	5	3	2	7	3	1	5	6	5	2	5	13	1
OCPFDLNE_01182	27	23	16	13	19	25	23	135	143	39	146	137	107	56	58	147	74	33	15	126	46	91	49	79	207	62	50	18	25	14	19	11	31	11	16	18	21	14	16	25	23	22	20	33	22	14	19	57	15
OCPFDLNE_01183	2	4	1	3	2	3	3	3	13	2	3	10	10	0	6	8	3	0	2	6	2	2	4	8	9	4	9	0	4	2	3	5	3	3	1	2	3	0	3	6	11	6	6	11	4	9	7	4	6
OCPFDLNE_01184	90	56	46	33	47	89	37	69	53	48	44	92	78	0	43	79	51	5	7	39	34	27	38	44	47	34	30	65	60	44	43	50	90	36	47	67	64	43	49	86	82	66	70	83	58	50	69	100	59
OCPFDLNE_01185	0	0	0	0	0	1	2	0	0	0	2	0	3	0	1	0	0	0	0	3	0	0	0	2	1	1	1	0	1	3	0	1	0	1	0	0	0	0	0	0	0	2	1	0	1	0	1	0	0
OCPFDLNE_01186	70	38	40	19	20	40	39	45	33	43	49	64	162	13	107	206	114	20	5	73	26	58	43	47	93	49	58	93	75	39	30	73	85	32	53	38	75	57	64	86	89	79	72	112	60	67	66	132	54
OCPFDLNE_01187	28	21	18	16	13	24	35	31	25	24	15	37	56	12	34	71	51	9	1	30	16	17	22	20	25	12	21	24	20	12	11	20	58	7	19	16	25	26	29	32	35	31	32	33	19	26	22	63	13
OCPFDLNE_01188	16	18	12	11	17	18	26	16	26	21	14	37	58	7	31	60	43	22	0	19	5	22	14	21	24	20	12	19	20	15	15	32	34	12	15	20	29	21	18	33	40	30	34	46	24	18	28	73	16
OCPFDLNE_01189	31	29	21	9	10	28	26	39	24	24	21	44	80	9	44	93	67	13	4	29	7	21	31	24	49	12	24	51	40	23	33	33	54	18	21	29	43	36	42	42	33	47	48	55	39	43	33	99	33
OCPFDLNE_01190	33	29	17	11	9	34	32	53	41	40	43	56	108	0	56	95	72	3	9	45	19	41	33	28	49	19	27	46	32	29	45	47	42	21	24	27	45	40	45	48	41	37	49	51	23	27	48	69	37
OCPFDLNE_01191	11	10	6	2	5	8	3	6	8	5	10	13	28	0	15	21	22	0	3	15	13	21	19	12	29	13	12	10	11	10	9	9	20	5	17	6	19	10	13	9	17	9	19	13	8	9	12	22	9
OCPFDLNE_01192	4	5	6	3	2	2	6	2	11	11	7	5	27	2	13	24	23	3	0	11	5	10	12	13	15	8	13	7	17	4	2	20	6	4	16	9	13	7	10	2	13	16	17	13	6	8	15	18	9
OCPFDLNE_01193	4	0	1	0	0	0	1	2	3	1	1	2	7	3	6	6	6	4	0	3	5	3	3	1	5	2	0	3	2	0	0	2	0	2	2	0	1	1	3	3	1	5	4	2	2	7	4	5	2
OCPFDLNE_01194	37	54	32	18	24	37	26	50	38	30	32	54	131	38	71	160	97	32	15	53	20	57	59	74	93	50	67	90	86	71	40	93	83	52	60	57	95	79	60	75	76	103	99	104	50	47	72	114	57
OCPFDLNE_01195	64	48	46	26	47	39	60	42	56	47	51	68	132	63	74	154	99	74	4	64	21	62	46	39	71	34	31	62	92	54	26	116	84	51	64	54	93	86	63	90	62	88	86	60	55	61	64	122	71
OCPFDLNE_01196	86	85	72	43	34	69	61	62	73	84	75	100	190	67	126	284	154	46	11	112	32	77	58	72	97	49	55	103	113	79	48	170	177	77	79	72	128	133	108	101	113	111	159	128	73	74	73	169	91
OCPFDLNE_01197	218	338	221	101	147	234	222	233	268	261	304	288	611	175	396	1035	539	194	44	414	108	240	197	295	487	192	237	430	416	256	143	511	571	219	381	230	411	411	373	341	401	405	468	487	261	310	315	612	368
OCPFDLNE_01198	122	140	97	55	69	124	118	134	128	132	143	157	243	128	177	452	235	142	27	161	61	113	107	139	213	98	115	184	231	141	75	236	253	99	185	149	183	182	178	155	176	153	246	212	128	133	139	284	145
OCPFDLNE_01199	135	135	112	62	63	129	83	99	134	115	121	155	254	51	201	428	254	80	36	177	65	139	108	178	229	95	148	198	252	133	94	235	244	105	186	125	195	202	163	157	156	204	259	258	133	143	144	310	156
OCPFDLNE_01200	321	382	279	130	198	337	251	273	293	281	356	367	652	196	388	1080	593	231	90	457	160	319	256	423	490	265	409	517	498	322	208	576	646	259	343	240	412	415	386	342	393	404	497	503	227	267	305	584	319
OCPFDLNE_01201	84	103	65	29	42	64	57	69	79	66	74	85	130	89	112	235	139	84	19	111	45	71	59	85	95	58	95	135	149	79	42	152	158	79	103	84	109	109	69	71	108	96	105	102	60	67	80	141	72
OCPFDLNE_01202	242	252	202	112	125	217	150	142	137	151	195	221	280	100	224	466	303	125	63	306	80	172	174	283	339	201	186	375	477	280	170	403	415	152	262	187	255	313	258	230	289	274	338	322	154	192	226	375	195
OCPFDLNE_01203	159	171	142	95	124	157	112	117	142	127	141	168	230	67	167	320	181	82	32	182	69	117	93	150	192	115	115	183	217	123	125	211	218	116	157	116	148	149	118	127	131	144	187	152	75	104	147	200	132
OCPFDLNE_01204	115	138	92	32	50	138	83	95	96	86	98	105	188	79	130	291	166	90	22	141	46	108	70	158	161	95	111	195	181	98	85	204	243	96	90	88	128	147	122	106	133	127	149	166	79	94	95	188	100
OCPFDLNE_01205	343	338	271	126	143	277	174	195	181	186	244	275	395	44	282	687	410	46	66	347	136	240	218	400	398	219	332	521	555	305	212	505	559	208	335	255	315	393	271	252	331	310	353	379	208	216	274	466	235
OCPFDLNE_01206	62	64	48	19	32	80	46	45	43	33	55	68	134	41	67	145	80	40	9	56	28	44	34	77	68	46	59	88	92	44	32	98	101	40	40	28	65	56	48	46	49	41	64	54	37	34	49	100	40
OCPFDLNE_01207	37	45	40	17	16	41	29	29	35	40	32	35	70	17	41	62	57	17	2	45	17	29	29	29	51	25	37	72	64	36	27	48	66	32	36	24	33	45	36	26	31	36	52	43	16	29	23	34	40
OCPFDLNE_01208	182	209	163	78	93	182	131	147	146	142	142	190	306	147	200	446	260	120	40	204	72	190	131	212	207	130	180	298	344	154	130	307	291	146	203	161	200	226	188	155	146	166	232	240	114	125	186	292	145
OCPFDLNE_01209	233	268	191	95	125	193	153	128	164	133	174	231	384	144	221	503	336	139	49	279	106	186	152	278	328	169	226	369	373	171	152	302	436	142	218	173	218	241	192	170	243	191	276	226	124	167	160	329	200
OCPFDLNE_01210	191	236	190	82	140	212	157	165	169	158	165	205	355	132	239	530	299	112	49	280	110	180	163	265	294	170	198	260	374	198	134	319	423	167	203	174	222	266	177	177	215	185	215	208	109	141	164	314	152
OCPFDLNE_01211	90	107	75	47	71	81	62	86	67	59	87	97	192	59	105	224	147	69	20	120	42	77	54	93	101	55	77	134	143	85	54	140	182	61	100	81	91	105	87	86	76	87	115	106	60	67	73	131	83
OCPFDLNE_01212	57	45	52	33	38	60	38	49	54	46	48	79	123	74	75	197	85	56	19	104	31	79	61	106	127	70	98	82	105	51	55	78	94	49	60	63	61	86	72	65	54	65	78	76	48	39	81	115	46
OCPFDLNE_01213	7	21	11	3	8	9	12	15	18	11	11	20	40	16	18	38	24	29	5	16	2	21	6	16	19	8	9	15	24	8	11	25	32	11	11	15	10	11	16	22	11	12	26	26	9	16	10	36	9
OCPFDLNE_01214	4	6	4	6	3	4	7	14	9	9	14	16	23	2	15	23	19	4	0	5	6	8	13	9	8	2	7	7	4	3	4	4	7	7	4	3	5	2	4	5	7	13	12	8	9	9	12	26	6
OCPFDLNE_01215	9	6	1	2	2	8	3	6	3	10	5	10	8	13	9	11	5	9	0	6	7	8	6	4	13	7	7	9	8	4	3	7	4	1	4	7	4	9	4	5	3	4	8	7	5	1	6	17	1
OCPFDLNE_01216	19	22	16	10	10	24	24	28	23	30	10	47	50	54	28	38	25	30	3	39	27	36	31	56	58	49	48	32	39	29	19	35	56	15	32	33	43	32	22	56	46	51	35	41	62	31	54	87	37
OCPFDLNE_01217	43	55	30	23	18	49	38	46	38	47	34	86	148	209	53	91	60	150	14	65	41	63	57	93	82	68	74	64	56	43	28	76	95	40	43	61	80	74	51	109	92	121	98	113	90	71	65	138	52
OCPFDLNE_01218	11	7	2	5	6	9	1	1	3	8	6	9	13	26	7	17	8	12	0	3	3	2	4	0	0	6	3	11	7	6	2	12	12	1	2	2	7	9	3	4	7	2	6	7	1	1	3	11	2
OCPFDLNE_01219	9	11	7	0	4	7	6	5	7	5	4	8	9	33	2	17	3	20	0	11	4	2	4	5	12	3	6	10	11	7	6	13	19	0	4	4	5	4	7	1	2	2	3	3	1	2	4	3	0
OCPFDLNE_01220	2	3	7	2	4	6	2	5	4	4	2	10	9	6	1	8	4	8	1	8	3	2	1	7	11	5	4	11	10	2	3	5	11	4	2	4	5	9	1	4	2	3	0	3	0	0	4	2	3
OCPFDLNE_01221	1	3	4	1	2	4	3	1	1	1	1	2	6	7	0	4	2	9	0	3	3	7	2	2	4	6	7	6	4	4	0	3	0	1	2	1	4	2	1	3	0	0	3	1	0	2	0	4	1
OCPFDLNE_01222	4	4	2	4	0	2	2	3	3	2	4	5	2	2	1	1	2	4	0	4	5	3	5	1	8	6	2	2	2	4	6	5	2	2	3	3	5	6	5	1	2	1	2	2	1	1	3	1	0
OCPFDLNE_01223	10	10	7	1	5	11	5	6	6	7	7	11	11	18	2	13	6	16	1	7	4	9	11	20	11	6	4	19	21	11	9	17	44	1	8	5	11	8	5	4	7	8	1	10	1	2	2	2	5
OCPFDLNE_01224	4	7	1	2	2	4	2	2	3	5	0	3	4	6	0	2	2	6	1	1	1	1	1	0	7	1	0	2	0	1	4	1	3	2	1	2	1	3	1	3	1	3	2	0	0	0	1	2	1
OCPFDLNE_01225	3	1	0	4	1	3	2	2	2	2	0	2	5	2	2	4	1	2	0	6	0	7	0	5	1	2	1	4	7	1	0	2	5	1	2	1	6	0	3	2	1	3	2	2	4	2	3	1	6
OCPFDLNE_01226	1	2	4	1	2	8	1	2	6	2	3	0	2	3	1	3	1	6	0	4	0	1	2	7	1	0	1	2	7	5	5	2	5	0	2	0	3	2	0	0	1	2	1	0	0	0	1	1	0
OCPFDLNE_01227	6	7	2	1	3	3	1	5	1	2	8	0	2	8	0	2	0	8	1	1	2	1	4	5	1	5	2	8	2	5	4	9	6	1	2	2	4	1	4	0	1	0	0	3	0	2	1	2	1
OCPFDLNE_01228	1	2	1	1	1	0	1	1	0	2	1	2	3	2	0	2	0	2	0	3	2	1	0	1	3	1	2	0	0	1	1	3	2	0	0	0	2	2	0	0	0	2	0	1	0	0	0	0	0
OCPFDLNE_01229	1	2	1	1	1	1	0	2	0	0	2	1	3	1	0	0	0	3	1	2	1	0	0	0	2	0	0	1	0	3	0	2	1	4	4	0	1	0	2	0	0	0	2	0	3	1	3	2	0
OCPFDLNE_01230	3	4	2	2	1	1	1	2	0	2	2	2	7	4	1	2	1	4	2	3	3	2	3	2	6	2	2	6	3	1	1	3	8	0	3	3	2	2	0	1	2	1	2	1	0	1	0	0	1
OCPFDLNE_01231	1	3	0	0	0	0	0	0	0	0	0	0	2	0	0	2	0	0	0	0	0	0	0	0	0	0	1	2	0	1	0	1	0	0	0	0	0	0	0	0	0	0	1	0	0	0	0	1	0
OCPFDLNE_01232	12	25	8	6	5	16	16	28	31	25	28	46	51	0	21	48	23	0	4	22	22	21	23	44	53	35	75	18	14	9	11	9	21	15	6	8	22	10	11	32	23	19	23	23	20	7	19	47	14
OCPFDLNE_01233	113	71	44	60	45	83	60	114	152	84	95	175	165	120	133	193	146	57	26	130	92	84	109	240	207	123	133	116	105	63	99	88	119	50	64	152	108	79	89	148	107	125	108	109	123	76	136	358	80
OCPFDLNE_01234	275	357	245	126	127	292	242	362	248	248	257	540	802	170	275	813	474	150	26	297	107	274	226	321	622	244	211	370	334	176	211	351	634	135	172	234	347	220	308	319	288	212	246	330	236	173	154	866	146
OCPFDLNE_01235	80	82	61	29	33	58	68	66	78	70	89	86	211	58	155	423	201	62	18	143	52	127	95	150	206	114	107	112	122	72	50	120	136	68	118	70	111	136	110	101	124	141	193	174	82	90	137	244	123
OCPFDLNE_01236	26	29	37	10	31	32	48	36	41	36	41	36	121	18	71	206	110	20	15	61	17	32	42	30	51	38	33	54	60	36	32	60	50	29	61	44	79	65	67	68	100	87	104	103	40	83	82	144	59
OCPFDLNE_01237	24	27	19	9	15	25	25	24	27	32	33	33	91	19	64	171	78	15	8	34	13	28	29	17	55	15	22	30	36	29	22	49	59	39	27	38	40	34	38	59	51	54	57	60	34	45	60	91	57
OCPFDLNE_01238	58	59	63	27	47	65	69	78	70	80	73	85	201	46	165	278	201	37	34	114	44	79	87	100	141	73	90	105	133	71	44	129	104	58	107	86	118	125	125	122	146	140	187	195	85	78	133	174	107
OCPFDLNE_01239	22	33	22	3	13	36	27	24	31	18	30	29	93	0	52	124	70	0	7	53	16	35	35	58	55	36	52	26	28	23	23	52	60	19	39	26	62	38	36	33	46	44	72	50	32	32	56	75	48
OCPFDLNE_01240	16	12	20	8	13	16	20	21	34	22	24	29	76	12	51	101	74	8	9	40	28	23	31	42	52	37	34	50	56	41	32	50	37	24	46	54	35	55	39	55	56	46	71	56	31	33	45	108	40
OCPFDLNE_01241	43	49	51	22	31	50	40	36	37	39	50	49	135	43	93	201	119	53	18	92	33	63	62	78	91	51	64	59	80	38	32	79	54	42	65	58	84	68	57	84	78	85	116	87	42	60	59	114	67
OCPFDLNE_01242	67	70	56	27	38	47	36	66	48	61	71	71	150	54	108	291	177	49	28	127	37	78	69	113	155	84	109	113	115	65	43	120	118	49	104	80	98	104	102	82	119	112	136	127	54	107	121	193	120
OCPFDLNE_01243	65	62	41	21	40	45	53	29	52	40	47	51	116	41	88	162	147	56	12	96	42	73	55	111	106	58	83	58	93	56	29	104	89	40	79	60	75	87	86	78	101	106	140	114	60	80	95	151	65
OCPFDLNE_01244	35	39	24	9	19	39	38	36	40	31	48	36	139	23	92	185	107	16	13	79	20	52	40	80	95	54	74	75	84	48	42	86	80	34	69	44	69	61	50	46	75	68	86	107	62	54	78	124	64
OCPFDLNE_01245	49	58	44	20	30	58	54	42	45	70	47	105	233	73	138	268	158	72	11	110	31	58	64	61	123	47	52	87	82	61	39	93	109	50	99	71	114	143	113	111	113	121	182	179	82	83	127	285	118
OCPFDLNE_01246	20	25	15	12	10	22	23	17	24	38	28	46	107	26	71	109	90	49	0	39	10	21	21	15	45	13	23	51	33	24	21	55	59	37	43	40	35	49	39	59	61	59	86	63	44	53	56	127	56
OCPFDLNE_01247	30	23	13	11	15	27	19	22	16	21	25	26	81	23	61	111	85	15	1	31	11	20	13	20	55	15	22	23	44	14	25	48	33	20	39	33	41	53	27	31	48	45	74	52	40	34	56	84	49
OCPFDLNE_01248	18	23	14	17	14	14	22	29	20	29	16	20	93	12	40	105	47	16	3	28	11	27	13	12	26	11	26	37	33	15	9	41	35	20	29	27	32	30	22	31	39	43	46	47	29	26	29	68	22
OCPFDLNE_01249	7	8	6	4	5	7	6	15	11	8	10	16	20	9	15	30	21	16	1	5	6	11	6	5	4	3	0	13	15	9	3	9	14	5	9	5	8	7	5	7	11	15	13	13	8	12	13	32	10
OCPFDLNE_01250	13	16	20	10	8	18	11	19	14	15	24	16	52	5	23	65	46	16	3	27	11	16	4	16	21	13	7	24	22	13	9	19	23	9	11	15	11	19	17	9	12	14	20	20	3	11	15	35	27
OCPFDLNE_01251	35	46	22	9	8	31	17	43	36	28	28	48	73	42	71	143	75	38	7	51	22	51	23	44	82	34	41	45	47	19	32	41	48	19	23	45	30	38	40	48	47	43	56	70	19	33	38	110	48
OCPFDLNE_01252	79	75	70	30	39	71	73	83	112	88	89	118	216	88	164	331	193	94	17	133	65	98	87	132	206	87	102	123	154	85	63	140	119	71	123	92	130	142	104	152	124	155	212	186	101	110	179	242	125
OCPFDLNE_01253	34	26	26	14	16	36	37	46	43	41	27	43	73	27	55	105	70	43	9	65	20	36	27	61	64	34	41	43	42	12	18	41	55	30	33	16	47	33	26	44	37	32	52	65	25	24	57	70	32
OCPFDLNE_01254	0	0	0	0	0	0	0	1	0	0	0	0	1	0	0	0	0	0	0	1	0	1	0	0	3	0	0	0	3	1	0	0	1	0	0	0	0	0	0	0	1	0	0	0	0	0	0	0	0
OCPFDLNE_01255	1	0	0	0	0	1	1	1	1	1	1	0	4	0	0	0	0	1	0	0	0	1	0	0	2	4	2	4	1	1	0	0	1	1	0	0	0	1	0	1	0	0	0	1	1	0	2	0	0
OCPFDLNE_01256	1	3	2	2	1	2	1	1	1	3	3	7	7	2	1	5	3	0	0	4	1	2	1	4	8	4	1	7	3	2	3	1	6	3	3	0	3	2	2	2	10	2	6	2	4	5	6	11	3
OCPFDLNE_01257	1	2	4	2	1	0	4	3	3	3	2	4	5	15	10	6	6	11	0	8	3	2	2	7	8	4	5	11	7	5	3	6	3	3	5	9	5	4	3	10	1	5	6	8	5	3	3	17	2
OCPFDLNE_01258	2	4	4	1	2	3	5	7	6	0	5	12	15	16	9	12	1	8	0	4	0	2	3	5	2	3	3	5	5	2	5	2	11	0	3	0	3	4	6	2	1	7	6	4	6	1	4	7	1
OCPFDLNE_01259	4	1	5	2	4	11	17	15	20	11	8	24	19	17	10	21	24	10	2	12	5	9	23	41	29	21	29	14	4	5	7	4	20	1	2	7	7	12	3	10	6	10	8	20	24	5	7	23	11
OCPFDLNE_01260	1	3	1	0	0	1	4	3	6	2	1	5	7	2	8	7	4	3	0	7	3	9	8	7	6	10	6	6	5	1	1	2	3	0	2	2	3	0	2	3	5	3	6	4	7	3	3	6	3
OCPFDLNE_01261	30	44	16	11	21	31	35	33	35	29	45	52	63	72	30	87	40	37	9	52	23	47	32	69	97	46	62	45	46	22	26	53	55	17	33	26	38	41	43	43	38	45	37	43	46	38	36	71	27
OCPFDLNE_01262	29	21	15	12	9	22	13	35	25	17	25	27	31	70	19	39	32	51	9	47	10	27	27	57	50	27	46	31	43	36	28	34	46	8	21	12	21	29	20	27	28	28	25	34	19	19	21	43	21
OCPFDLNE_01263	33	26	27	12	16	43	35	81	66	50	57	129	180	34	61	117	86	27	11	95	51	55	55	98	181	74	67	51	23	18	32	29	69	13	28	33	45	33	43	74	57	52	49	63	73	34	47	174	55
OCPFDLNE_01264	485	342	251	171	203	561	192	304	189	146	134	415	363	226	107	152	151	215	23	157	98	109	51	151	117	79	95	280	151	119	164	146	569	75	74	131	156	125	129	119	67	66	80	110	62	64	55	178	69
OCPFDLNE_01265	12	7	1	7	3	5	5	4	7	5	8	9	15	3	5	13	7	4	1	20	7	8	5	14	19	4	6	4	7	2	4	10	9	1	3	4	14	12	4	7	8	5	11	3	8	6	7	11	7
OCPFDLNE_01266	23	19	12	4	15	23	9	20	18	21	11	25	47	17	17	30	25	5	8	41	14	17	20	42	35	30	42	36	27	19	16	27	31	10	21	22	26	26	16	14	22	20	36	33	19	18	25	62	22
OCPFDLNE_01267	5	2	3	1	2	1	5	2	3	3	3	8	6	2	1	5	4	3	2	5	4	13	3	18	7	7	6	5	5	1	1	3	8	2	2	7	5	0	3	2	1	4	6	7	7	5	6	6	1
OCPFDLNE_01268	28	34	25	10	10	38	30	29	40	35	22	56	70	6	29	43	42	4	10	39	36	37	47	117	58	57	93	36	38	27	18	30	37	27	36	36	42	40	40	38	42	41	35	61	35	26	37	43	28
OCPFDLNE_01269	15	6	7	3	6	17	14	11	19	15	10	21	23	19	13	37	14	6	4	24	7	16	28	42	30	16	21	13	30	16	11	29	26	12	17	16	23	19	21	29	19	13	10	28	32	11	21	53	21
OCPFDLNE_01270	129	142	102	41	53	127	74	84	94	88	93	135	167	67	100	183	101	51	27	166	76	139	107	253	200	138	196	199	177	131	89	212	277	69	128	100	142	209	124	149	198	163	177	201	128	95	129	259	104
OCPFDLNE_01271	6	6	1	0	3	8	5	3	6	6	6	8	21	5	4	10	2	6	3	0	2	2	1	5	3	2	5	2	2	2	2	4	11	1	2	0	4	7	4	8	7	3	3	2	6	3	5	13	6
OCPFDLNE_01272	1	0	1	1	1	0	3	4	2	3	2	9	14	1	5	5	3	0	1	1	2	4	4	8	4	3	5	4	1	1	2	3	10	1	0	0	5	3	2	5	1	3	8	3	5	2	5	11	2
OCPFDLNE_01273	49	24	15	31	21	55	41	43	49	44	28	55	82	34	46	46	54	22	11	37	37	18	38	34	34	32	22	59	41	18	42	56	86	36	38	56	56	59	21	51	55	66	48	70	71	49	40	123	44
OCPFDLNE_01274	26	27	14	11	8	30	24	46	35	46	34	73	71	61	29	50	44	46	4	40	20	28	38	40	71	17	44	31	27	15	19	41	33	24	13	30	43	44	22	44	40	43	40	50	43	21	30	76	24
OCPFDLNE_01275	41	43	26	22	27	36	29	49	51	54	72	86	78	44	50	133	87	24	16	112	80	68	135	186	127	88	176	75	54	35	34	63	81	33	29	47	68	57	57	39	56	69	46	81	46	37	40	101	36
OCPFDLNE_01276	88	98	81	39	47	85	68	108	147	96	131	157	131	96	133	255	181	65	70	191	193	173	345	683	275	321	670	137	139	96	79	131	135	69	95	98	121	124	97	66	93	139	137	119	90	76	118	149	81
OCPFDLNE_01277	52	47	28	22	17	129	68	125	125	104	61	168	144	103	88	92	79	95	22	79	62	45	44	71	92	60	62	65	44	36	47	36	96	28	26	42	66	32	45	57	49	26	25	51	50	32	34	144	44
OCPFDLNE_01278	59	41	41	21	32	40	39	62	85	49	86	93	100	31	73	142	83	20	32	169	64	101	152	346	211	134	283	91	74	52	37	100	98	45	63	65	80	88	72	72	84	87	101	97	61	36	95	130	51
OCPFDLNE_01279	3	2	2	0	1	4	3	4	5	4	6	2	11	2	10	11	3	2	0	12	3	4	4	12	9	8	12	3	2	2	1	2	10	2	2	4	4	4	3	6	6	3	6	5	10	2	7	8	4
OCPFDLNE_01280	7	11	3	4	2	8	6	18	24	12	11	17	27	15	11	13	9	8	5	17	5	5	7	4	34	18	8	5	5	3	5	9	15	3	7	1	5	4	11	13	4	9	5	5	11	6	3	23	9
OCPFDLNE_01281	7	10	3	2	7	4	9	10	6	7	10	7	21	4	12	21	9	1	1	17	6	13	17	26	32	17	38	14	4	5	4	10	9	7	3	5	15	12	2	9	17	15	19	27	20	3	13	31	12
OCPFDLNE_01282	2	6	6	5	7	5	6	6	8	8	14	16	24	10	15	35	14	5	2	19	9	21	11	27	32	18	37	10	7	4	4	8	9	11	6	9	10	14	7	7	11	11	19	19	17	13	16	22	10
OCPFDLNE_01283	2	3	5	0	4	7	7	8	6	8	7	10	22	7	10	25	12	1	2	14	12	7	12	14	12	10	25	10	14	6	4	13	6	8	15	16	10	11	15	16	9	19	19	19	10	16	13	27	13
OCPFDLNE_01284	10	5	3	7	1	7	13	12	9	12	8	10	29	14	24	23	15	9	6	18	8	8	16	15	19	25	19	13	11	11	7	10	14	14	12	11	14	17	18	22	20	17	17	21	13	13	17	35	12
OCPFDLNE_01286	277	194	140	109	118	304	224	279	243	213	144	555	750	75	303	464	470	76	48	265	153	243	138	282	408	174	235	369	304	195	240	287	580	166	245	366	457	300	424	590	477	572	494	736	694	406	539	1979	618
OCPFDLNE_01287	4	6	4	2	5	4	7	9	5	9	9	19	26	0	7	8	11	1	5	11	4	11	4	12	17	8	12	2	5	1	1	5	7	1	5	5	3	5	5	13	6	8	3	3	5	2	11	21	11
OCPFDLNE_01288	8	2	7	5	5	11	17	17	19	12	16	33	29	14	25	29	21	10	5	24	17	12	16	32	37	12	25	7	7	3	9	4	5	7	9	9	18	10	8	23	14	20	18	20	17	7	19	45	11
OCPFDLNE_01289	4	3	3	8	4	9	10	10	9	11	14	18	29	20	12	24	19	11	3	13	5	16	15	24	30	9	15	13	3	4	3	5	23	6	3	6	11	11	13	12	22	20	18	24	12	8	21	33	16
OCPFDLNE_01290	4	4	4	3	4	9	8	11	20	16	13	17	25	3	17	5	14	4	5	12	14	6	2	16	6	7	11	4	4	6	6	0	14	4	2	2	6	4	7	10	2	4	3	6	12	2	4	23	11
OCPFDLNE_01291	34	47	28	21	30	68	55	83	106	68	86	115	136	66	95	125	111	61	18	127	75	127	127	250	197	117	164	61	55	53	34	58	76	37	59	43	60	74	49	70	73	87	66	114	78	47	78	124	54
OCPFDLNE_01292	5	10	1	5	2	8	8	13	17	7	11	22	18	7	6	12	11	7	4	27	13	22	14	30	23	22	24	5	6	4	5	11	5	2	4	5	11	5	6	4	4	11	11	9	6	3	7	12	4
OCPFDLNE_01293	0	0	0	0	0	0	0	0	0	0	0	0	2	0	0	0	0	0	0	2	0	2	1	0	0	0	0	0	0	0	0	3	3	0	1	0	1	0	0	0	0	0	0	0	0	0	0	0	0
OCPFDLNE_01294	0	1	0	0	1	0	1	0	0	2	1	3	6	0	1	1	5	1	0	1	3	0	3	3	4	1	1	1	0	5	0	0	0	1	0	0	0	0	0	1	1	4	2	1	0	1	1	8	0
OCPFDLNE_01295	13	22	9	6	18	20	26	49	40	40	32	94	187	28	94	150	130	18	4	77	37	75	98	184	112	64	163	32	24	22	22	40	38	16	25	46	32	34	29	59	59	73	93	83	113	49	75	201	51
OCPFDLNE_01296	3	4	3	1	3	3	6	11	19	13	3	20	17	0	8	9	20	1	0	7	4	8	5	13	7	9	15	1	2	1	2	2	5	2	4	5	6	5	5	8	5	9	13	3	14	7	6	33	6
OCPFDLNE_01297	1	0	3	1	0	2	0	4	4	4	2	4	2	5	1	10	4	4	1	4	5	4	2	8	10	3	2	2	1	3	2	0	6	0	0	1	5	1	0	1	0	0	2	0	1	0	0	1	1
OCPFDLNE_01298	13	18	8	6	8	14	12	19	24	16	18	36	50	7	17	29	26	4	1	44	18	30	32	63	44	16	36	15	8	12	8	17	15	5	13	19	18	12	7	7	21	11	7	19	5	9	10	28	8
OCPFDLNE_01299	86	52	29	34	35	67	36	86	74	71	51	112	120	19	65	59	62	5	2	61	22	32	28	19	29	12	16	36	28	14	55	31	55	18	32	47	48	44	28	63	30	37	36	25	43	28	39	119	30
OCPFDLNE_01300	9	6	3	3	4	14	11	11	17	19	23	19	31	6	13	32	24	12	3	20	9	23	18	12	26	8	25	9	10	9	13	10	23	7	11	10	16	8	7	27	20	7	16	16	16	8	14	40	14
OCPFDLNE_01301	594	513	366	265	266	611	213	313	253	246	269	435	259	7	107	200	96	4	22	246	119	182	151	327	209	171	198	569	667	353	294	488	819	239	340	358	380	402	354	347	342	351	353	348	263	250	343	628	255
OCPFDLNE_01302	234	262	163	110	118	253	81	118	90	87	86	183	127	10	47	120	62	6	12	86	49	112	54	121	130	51	79	296	250	130	95	224	350	114	153	124	177	160	112	116	128	126	146	124	105	98	124	235	106
OCPFDLNE_01303	14	9	8	4	3	18	7	14	11	7	7	12	16	20	13	17	22	8	5	9	16	18	7	22	8	12	13	9	18	14	6	15	21	10	8	12	15	21	11	26	26	21	25	17	18	16	26	25	19
OCPFDLNE_01304	5814	2813	2467	2750	3035	6316	1757	2327	2096	1730	1052	2919	2139	1020	1056	1432	1050	758	41	889	381	486	451	219	464	222	140	2833	2165	1067	2499	1535	2864	954	1024	1530	2203	1121	1173	1582	804	783	860	926	805	742	755	2548	1021
OCPFDLNE_01305	87	77	51	52	52	86	74	100	118	72	73	119	158	44	100	146	111	41	29	109	65	104	83	173	157	96	105	103	87	43	78	105	113	48	58	88	97	69	74	133	135	128	121	127	125	70	105	219	80
OCPFDLNE_01306	6	3	2	1	1	5	5	10	7	7	7	8	17	2	6	14	13	3	3	13	2	2	4	26	6	6	16	2	4	2	2	5	7	4	1	6	7	3	5	8	3	12	5	2	9	5	7	19	8
OCPFDLNE_01307	2	2	0	1	0	3	0	2	7	2	2	9	13	1	2	5	4	2	2	2	3	8	3	12	9	4	12	0	2	0	1	1	4	0	1	1	1	6	2	1	9	4	5	3	5	2	3	7	3
OCPFDLNE_01308	50	29	20	29	18	54	32	37	52	39	26	79	128	64	54	55	56	44	3	30	19	38	20	30	48	21	33	45	51	26	19	45	50	33	35	30	43	51	39	81	65	67	90	77	81	64	93	115	65
OCPFDLNE_01309	1	2	0	0	2	2	1	3	3	4	1	0	3	2	2	2	2	0	0	1	1	0	0	4	7	5	5	0	4	2	0	1	1	0	0	2	3	0	0	0	0	1	4	0	4	4	1	8	0
OCPFDLNE_01310	0	0	0	0	0	0	0	0	0	0	0	0	0	0	0	0	0	0	0	0	0	0	0	0	0	0	0	0	0	0	0	0	0	0	0	0	0	0	0	0	0	0	0	0	0	0	0	0	0
OCPFDLNE_01311	0	0	0	0	0	0	1	0	1	0	0	0	2	0	0	0	0	0	0	0	0	0	1	1	1	0	0	0	0	0	0	0	3	0	0	0	0	0	0	0	2	0	0	0	0	0	0	0	0
OCPFDLNE_01312	2	0	0	0	0	1	0	1	0	0	0	0	1	0	0	0	0	0	0	0	0	0	0	2	0	0	0	0	1	0	1	0	0	0	0	1	0	0	0	0	0	0	0	0	1	1	0	0	1
OCPFDLNE_01313	5	3	1	3	3	6	6	10	7	4	2	19	18	0	4	6	9	2	1	3	4	4	6	14	7	8	22	6	3	5	4	3	5	6	1	5	4	5	3	1	6	4	6	15	13	7	2	20	5
OCPFDLNE_01314	385	376	236	161	178	437	397	654	621	481	435	904	937	204	506	714	591	158	85	443	293	413	289	659	669	355	523	478	341	222	350	338	792	186	244	360	438	358	422	417	379	434	378	551	416	275	332	1270	332
OCPFDLNE_01315	210	240	148	90	108	309	233	399	299	240	289	498	686	167	213	378	282	142	94	357	239	341	304	855	420	358	623	267	192	152	141	241	408	129	126	209	264	162	234	252	222	239	229	312	225	163	169	510	152
OCPFDLNE_01316	17	23	9	8	4	26	24	40	39	20	21	65	104	11	48	60	47	11	5	61	29	55	34	47	59	25	43	22	29	11	24	31	43	16	25	20	32	37	25	37	25	47	53	52	39	20	33	115	34
OCPFDLNE_01317	20	34	16	6	13	15	29	42	38	44	27	40	62	16	38	47	47	15	0	44	27	42	33	31	55	20	32	44	31	21	21	36	56	16	36	33	41	44	43	36	41	57	40	24	46	28	32	83	24
OCPFDLNE_01318	15	11	5	7	10	5	11	10	11	13	11	18	35	12	17	27	19	6	7	40	15	35	22	50	50	27	46	14	16	6	9	12	5	11	10	11	18	23	11	8	17	13	18	23	21	9	11	31	8
OCPFDLNE_01319	11	17	9	3	9	21	11	18	25	13	18	25	50	25	30	45	25	18	4	63	26	39	40	102	84	39	86	19	12	9	13	15	47	6	11	22	27	12	14	13	20	25	25	24	21	11	13	29	15
OCPFDLNE_01320	14	7	4	5	7	14	11	23	47	13	20	28	49	4	29	41	26	4	8	42	36	47	38	87	63	37	86	15	21	12	15	25	18	9	14	20	13	22	15	14	24	16	16	25	18	8	13	36	16
OCPFDLNE_01321	0	0	1	0	0	1	0	0	1	3	1	1	1	0	3	2	1	0	0	0	3	1	2	1	2	2	2	1	0	1	0	0	0	0	0	1	0	1	1	1	1	0	3	2	1	0	2	1	0
OCPFDLNE_01322	41	54	43	23	20	86	63	89	104	83	91	149	129	22	81	129	93	30	47	188	102	146	158	279	299	145	249	89	79	47	52	97	135	44	62	64	75	92	80	91	89	121	117	113	91	59	93	208	57
OCPFDLNE_01323	29	25	21	14	21	43	11	30	37	15	35	37	53	2	43	40	33	2	11	45	34	26	28	79	101	44	72	45	49	18	23	36	59	16	17	36	41	19	29	30	36	24	31	55	35	19	25	72	23
OCPFDLNE_01324	61	52	41	14	31	78	42	59	55	50	49	63	97	43	45	99	62	36	26	87	56	80	72	171	98	83	109	62	59	40	38	76	104	36	42	39	60	69	44	53	60	53	72	61	64	39	53	99	22
OCPFDLNE_01325	35	33	27	13	16	40	21	32	32	21	28	39	51	14	29	62	42	10	18	54	35	35	40	123	83	65	80	57	60	39	29	45	58	35	40	37	47	44	31	31	37	52	55	39	32	34	31	57	26
OCPFDLNE_01326	134	104	83	46	47	125	78	117	125	76	84	122	144	76	101	155	110	47	43	146	99	116	134	441	214	166	303	182	147	121	102	157	202	84	101	132	121	115	107	119	101	126	131	121	113	93	137	241	97
OCPFDLNE_01327	28	30	14	4	13	29	25	48	37	23	25	69	71	20	19	41	38	19	5	38	19	30	18	96	49	30	70	31	22	16	22	15	61	17	11	16	31	29	26	20	17	12	30	31	17	21	23	74	15
OCPFDLNE_01328	10	8	7	4	7	12	11	13	20	6	14	24	27	13	11	17	21	13	5	20	5	18	16	19	32	9	22	10	9	3	12	11	24	12	7	4	18	14	7	15	14	14	11	34	24	18	26	49	9
OCPFDLNE_01329	4	6	4	0	2	3	2	10	7	6	6	8	9	6	6	7	13	6	1	6	3	6	4	15	12	5	8	5	2	4	3	7	13	2	1	3	6	10	4	6	1	10	9	12	8	3	2	14	4
OCPFDLNE_01330	13	20	14	4	7	23	8	17	20	21	22	30	39	15	20	30	21	10	2	22	20	22	13	38	30	16	43	20	17	12	14	28	31	12	11	18	16	15	16	16	29	28	26	22	21	11	16	41	14
OCPFDLNE_01331	7	2	1	4	6	5	8	18	12	8	15	23	38	3	11	25	17	5	4	24	11	22	10	29	45	22	25	7	5	10	4	5	16	3	5	8	11	7	9	8	9	13	15	16	12	9	3	14	12
OCPFDLNE_01332	61	57	37	29	47	131	77	135	119	96	66	160	288	152	102	155	111	145	8	100	69	66	36	123	127	86	88	85	51	45	61	62	142	37	44	52	101	60	70	88	74	69	57	87	72	52	59	250	69
OCPFDLNE_01333	42	47	41	11	24	53	38	37	66	58	61	71	116	56	63	127	94	35	22	66	42	53	80	145	85	54	130	79	87	52	40	86	98	56	67	62	74	90	83	73	88	100	87	132	67	44	82	124	58
OCPFDLNE_01334	56	79	64	45	37	92	66	99	95	98	96	182	172	112	68	162	113	76	28	99	101	74	114	326	152	108	260	125	105	82	79	119	181	54	81	65	87	120	93	77	65	100	92	109	75	50	77	138	77
OCPFDLNE_01335	38	17	13	19	16	26	18	34	30	27	23	48	53	29	37	29	29	12	3	23	9	18	12	17	52	18	24	29	18	17	12	22	41	5	15	19	24	6	18	23	23	27	16	19	22	13	17	63	18
OCPFDLNE_01336	3	4	2	1	3	7	4	4	7	3	4	6	12	0	5	6	4	0	2	10	3	4	12	19	9	11	11	4	9	7	7	4	7	8	6	7	6	10	7	12	7	13	17	8	12	9	10	19	7
OCPFDLNE_01337	3	2	4	1	2	5	0	6	1	0	3	6	18	3	4	8	7	0	1	4	2	5	5	9	5	2	8	2	7	4	6	6	7	1	5	12	8	8	7	6	6	9	4	3	2	8	8	7	2
OCPFDLNE_01338	90	74	54	41	46	103	77	137	108	80	98	142	207	50	115	179	109	22	62	195	140	190	152	387	320	282	354	92	139	88	99	114	130	75	96	111	100	123	86	123	150	142	139	137	137	88	124	220	84
OCPFDLNE_01339	10	2	4	0	2	11	5	5	11	9	9	15	20	4	13	19	14	7	2	13	11	20	6	18	17	16	13	11	12	8	4	3	8	4	4	11	15	13	8	17	15	30	20	20	20	3	7	32	5
OCPFDLNE_01340	3457	3048	2141	1550	1753	3544	2434	3733	3440	3007	2979	5138	5788	2313	3694	5577	4264	1327	608	5498	2671	4877	3889	6765	7327	4245	5986	4411	4893	2739	3048	4401	5078	2408	3624	4183	4601	4400	3853	6102	5946	6244	6273	6602	5529	3839	5843	9013	4066
OCPFDLNE_01341	25	21	13	8	9	22	21	31	38	36	27	52	64	35	41	76	49	17	8	51	26	42	44	87	92	50	95	36	36	20	29	42	33	21	15	33	36	37	27	28	35	40	40	61	49	29	35	108	44
OCPFDLNE_01342	85	87	77	48	68	182	106	161	142	138	87	262	294	88	153	125	116	89	15	128	67	88	55	64	83	48	39	101	46	38	76	66	130	39	47	80	106	58	66	118	52	52	67	85	98	52	78	217	83
OCPFDLNE_01343	1	2	2	0	2	1	4	0	5	3	4	6	2	0	4	3	1	1	2	9	1	3	6	9	4	5	9	0	2	1	2	1	9	0	1	1	0	1	1	2	4	3	1	2	2	2	1	4	1
OCPFDLNE_01344	4	0	1	0	0	3	1	5	6	1	3	6	14	6	8	9	9	5	1	6	2	0	5	8	5	8	16	7	4	3	0	2	7	3	2	0	4	4	2	3	3	2	0	4	1	1	3	3	4
OCPFDLNE_01345	3	0	0	1	1	0	2	4	7	6	4	9	13	0	1	4	10	1	0	6	1	7	2	2	8	1	7	3	1	0	1	0	0	0	0	0	5	5	4	1	3	4	0	3	3	1	2	4	1
OCPFDLNE_01346	15	12	12	9	4	19	6	17	21	24	16	29	66	19	28	41	26	25	1	23	14	19	16	25	29	15	15	30	12	6	6	20	22	10	18	9	29	20	17	18	39	24	26	32	23	12	21	44	15
OCPFDLNE_01347	6	3	3	3	2	4	5	13	4	7	9	23	17	0	8	8	10	0	1	13	7	7	12	9	18	6	9	8	3	3	2	8	8	1	2	8	7	7	10	7	11	8	6	10	9	6	7	19	6
OCPFDLNE_01348	343	370	241	149	189	419	358	484	511	307	349	778	768	0	407	699	568	0	138	539	380	520	406	947	879	515	682	425	375	203	290	382	679	176	260	406	439	379	344	456	449	456	438	537	398	242	362	1102	276
OCPFDLNE_01349	390	316	173	149	146	331	270	468	534	354	338	686	916	31	409	770	596	20	68	628	328	541	382	872	1051	439	723	430	443	189	270	385	705	197	267	432	508	425	417	489	540	500	498	560	506	313	443	1166	353
OCPFDLNE_01350	1	4	3	4	3	11	14	50	52	41	29	57	84	2	43	27	32	0	10	42	28	22	19	34	45	16	43	9	4	4	5	6	10	1	7	6	11	6	0	13	1	7	4	8	11	8	5	21	3
OCPFDLNE_01351	13	4	3	2	2	13	6	18	18	14	7	20	22	18	17	23	26	1	1	28	21	22	21	57	27	26	31	2	6	5	3	7	5	4	7	7	9	13	11	11	7	10	12	20	6	6	5	19	4
OCPFDLNE_01352	222	170	125	95	99	279	218	387	331	309	271	481	677	175	349	619	418	108	63	382	226	378	341	583	505	339	577	270	240	157	160	260	390	161	231	184	328	295	245	303	319	318	332	420	261	190	274	638	229
OCPFDLNE_01353	18	8	20	8	10	24	26	22	30	35	37	44	79	13	30	45	35	9	7	41	23	12	20	49	31	32	27	10	16	5	17	16	13	7	7	10	21	16	20	19	9	16	17	20	21	13	15	63	12
OCPFDLNE_01354	2	3	1	1	0	0	3	3	4	2	1	9	4	0	6	4	3	0	5	3	4	4	7	10	5	2	4	2	2	1	4	3	2	2	4	2	3	3	2	2	2	3	3	1	1	1	5	7	1
OCPFDLNE_01355	5	6	3	0	2	8	8	7	7	4	10	14	22	0	9	16	6	0	4	18	9	11	10	10	19	10	17	12	4	2	2	9	7	7	10	12	7	15	11	8	10	17	8	6	8	10	17	26	6
OCPFDLNE_01356	1	2	2	0	0	2	0	2	3	2	2	2	3	7	5	5	1	1	0	2	4	1	4	4	5	2	2	1	3	2	0	3	2	2	0	0	1	4	1	2	0	1	3	4	0	2	1	4	5
OCPFDLNE_01357	1	0	0	1	0	0	2	3	6	1	0	5	11	0	6	8	7	3	0	1	1	4	3	1	5	3	6	0	0	0	0	3	1	1	1	1	3	3	0	3	3	5	4	1	5	4	6	13	4
OCPFDLNE_01358	2	1	0	1	0	1	4	1	1	1	3	2	11	6	2	4	1	2	0	3	1	3	3	1	3	2	2	0	0	1	2	0	4	0	2	1	2	1	0	4	5	3	3	3	6	1	2	9	3
OCPFDLNE_01359	1	0	0	0	0	0	2	0	1	0	0	0	1	0	2	1	0	1	0	0	0	1	1	0	1	1	0	1	0	0	0	0	0	0	0	1	0	0	0	0	0	1	1	0	1	1	3	1	1
OCPFDLNE_01360	30	35	21	10	20	34	19	33	24	29	42	50	48	16	31	31	29	15	13	36	23	39	46	93	74	59	67	41	41	19	34	38	49	11	22	28	38	31	29	37	35	53	30	50	36	18	46	58	20
OCPFDLNE_01361	21	16	25	8	7	13	22	20	17	25	17	34	37	7	32	32	32	9	3	20	17	19	13	36	47	27	26	30	28	18	22	21	39	15	13	22	24	14	26	30	30	19	12	31	22	11	18	52	24
OCPFDLNE_01362	10	11	8	0	5	9	7	18	11	17	15	15	52	15	18	29	18	5	3	18	16	16	17	38	26	20	31	15	12	15	11	18	31	9	11	18	19	18	17	24	25	27	27	32	13	12	11	38	20
OCPFDLNE_01363	7	10	7	4	2	8	11	13	6	13	9	22	30	5	16	29	16	2	3	10	7	8	11	22	23	9	10	14	8	11	6	9	10	10	18	13	14	11	15	17	13	22	24	16	15	8	15	41	14
OCPFDLNE_01364	13	10	9	12	9	15	15	23	20	32	21	37	79	10	29	60	48	7	2	32	14	27	22	32	39	23	23	14	26	12	17	26	19	13	14	23	24	32	26	32	39	39	32	35	31	24	37	90	34
OCPFDLNE_01365	12	17	11	10	9	20	31	21	31	24	38	35	72	11	45	91	53	11	13	52	27	41	61	97	73	39	95	30	30	21	21	34	39	26	27	21	30	49	36	25	47	65	33	38	44	31	40	70	36
OCPFDLNE_01366	10	17	9	5	9	18	14	19	21	30	33	42	47	8	45	54	40	16	10	48	14	40	35	66	61	28	66	31	21	17	16	16	32	19	18	19	38	26	32	25	28	28	26	28	14	23	28	54	27
OCPFDLNE_01367	27	44	24	19	22	39	34	40	43	35	49	61	114	27	41	99	61	35	20	49	50	42	62	111	82	61	128	48	56	35	32	46	62	34	35	33	54	39	39	58	49	39	55	64	36	43	39	97	42
OCPFDLNE_01368	55	47	40	22	26	44	59	61	89	59	78	109	146	159	108	150	117	82	16	94	48	48	95	152	143	81	115	82	86	59	63	108	96	37	70	90	76	85	94	79	123	147	131	195	142	70	127	272	83
OCPFDLNE_01369	62	71	46	31	29	81	73	80	76	87	78	130	219	96	100	193	131	73	21	105	75	90	127	154	160	98	102	116	105	65	64	112	143	61	79	76	103	140	82	78	105	174	118	179	141	77	119	210	100
OCPFDLNE_01370	15	22	9	6	9	12	16	9	26	17	16	32	39	50	19	42	31	19	2	16	17	22	31	47	26	22	31	20	19	15	12	39	34	13	22	27	32	21	18	21	16	31	25	34	20	15	21	33	26
OCPFDLNE_01371	13	12	8	7	8	10	9	10	13	18	16	26	38	43	13	41	20	26	4	33	17	18	17	40	39	17	33	16	19	20	8	22	27	10	19	22	27	23	17	13	17	28	22	35	16	17	18	29	20
OCPFDLNE_01372	153	212	137	69	72	143	168	210	279	212	250	266	408	344	252	523	374	169	76	382	260	243	365	600	515	365	512	306	298	217	174	321	317	174	237	202	247	340	230	225	279	347	326	308	230	203	246	435	166
OCPFDLNE_01373	26	24	17	10	16	16	30	27	33	30	29	43	41	69	21	55	57	28	11	53	27	30	43	83	57	43	70	34	37	16	14	32	53	23	21	28	31	37	22	21	24	27	24	57	19	20	17	36	21
OCPFDLNE_01374	6	14	3	2	3	11	6	14	14	3	14	16	29	6	8	17	11	12	1	10	9	6	16	21	7	7	9	1	10	3	4	8	18	6	6	4	3	2	3	6	4	16	4	7	4	3	4	5	3
OCPFDLNE_01375	4	6	5	3	2	7	5	14	10	13	22	19	25	5	14	24	20	8	7	22	15	13	22	55	28	23	25	14	18	5	5	15	13	2	13	7	20	5	7	8	8	13	17	16	15	6	12	15	7
OCPFDLNE_01376	25	30	16	12	10	25	24	48	39	28	49	69	72	15	31	56	45	13	18	78	29	64	52	130	122	71	112	24	30	16	24	41	39	19	21	20	33	27	34	38	41	28	38	59	36	29	33	66	13
OCPFDLNE_01377	138	101	76	49	73	173	90	189	162	137	115	212	232	38	138	135	130	41	86	128	111	88	93	279	159	115	127	90	65	47	73	66	115	25	34	87	91	50	65	71	48	38	36	59	67	35	36	169	75
OCPFDLNE_01378	87	122	72	40	49	111	108	148	136	110	141	228	284	89	147	324	257	78	40	219	126	161	187	337	287	194	283	138	127	87	76	137	154	97	107	110	162	147	114	115	170	181	195	211	134	117	153	331	126
OCPFDLNE_01379	209	207	142	98	102	314	115	155	134	147	143	213	208	36	125	240	135	28	22	133	84	108	103	150	135	102	134	272	263	146	129	237	341	120	173	143	162	179	146	201	169	194	194	170	156	113	117	213	105
OCPFDLNE_01380	37	22	22	8	13	28	21	52	36	37	38	72	76	19	36	47	51	18	3	34	29	33	32	63	71	39	59	37	33	13	36	42	37	22	23	20	37	28	43	37	33	36	32	38	41	30	29	134	33
OCPFDLNE_01381	38	43	18	18	9	36	26	52	42	34	33	68	86	38	36	52	64	22	5	47	21	42	28	76	70	22	57	30	29	23	24	23	69	12	20	32	30	39	33	36	37	41	26	60	47	28	32	126	24
OCPFDLNE_01382	3	1	3	4	0	7	3	0	7	8	2	19	8	7	9	6	4	4	4	3	6	5	4	6	10	6	9	3	2	0	5	0	0	2	1	3	1	1	1	3	3	2	3	3	3	2	3	8	2
OCPFDLNE_01383	9	5	2	3	2	5	3	9	18	15	10	22	23	11	17	21	7	6	2	11	8	14	18	21	13	16	15	2	5	5	8	6	6	5	7	9	12	7	8	13	8	7	7	16	8	6	7	21	4
OCPFDLNE_01384	18	15	11	8	5	23	24	17	27	25	29	51	65	28	36	93	54	24	15	79	39	48	76	127	111	65	126	24	17	14	11	31	36	26	22	22	32	20	30	38	42	54	42	75	46	21	32	91	36
OCPFDLNE_01385	6	3	0	2	2	4	3	8	3	5	4	7	9	10	6	19	6	4	3	15	10	11	13	25	14	9	18	5	5	3	4	8	4	3	9	4	6	5	6	5	12	12	7	11	7	3	9	15	4
OCPFDLNE_01386	22	21	15	9	12	20	15	37	37	29	36	40	59	7	34	78	61	6	14	48	51	50	42	91	80	49	112	29	20	24	17	29	17	25	18	20	26	26	23	33	24	43	41	45	16	17	26	68	22
OCPFDLNE_01387	485	428	283	240	263	592	347	455	447	368	231	784	812	99	341	321	423	88	37	309	213	269	178	389	353	174	235	585	574	242	428	432	722	252	367	621	615	437	457	748	550	567	529	557	587	375	541	1447	467
OCPFDLNE_01388	0	1	0	0	0	0	1	0	0	0	1	0	4	0	0	0	0	0	0	0	0	0	0	0	0	1	1	0	0	0	0	0	0	1	0	0	0	0	0	0	0	1	0	0	0	0	0	0	0
OCPFDLNE_01389	0	0	1	0	0	0	0	0	0	0	0	0	3	0	0	0	0	0	0	1	1	0	2	0	0	0	0	0	0	0	0	0	2	1	0	0	0	0	0	0	0	0	1	0	2	0	0	0	0
OCPFDLNE_01390	1	0	0	0	0	0	0	0	0	0	0	0	0	0	0	0	0	0	0	0	0	0	0	0	0	0	1	0	0	0	0	0	0	0	0	0	0	0	0	0	0	0	1	1	0	0	0	1	0
OCPFDLNE_01391	0	1	0	0	0	0	1	0	1	0	0	0	2	0	0	0	0	0	0	1	0	0	0	0	0	0	2	1	1	0	0	0	0	0	0	2	0	0	0	0	1	1	0	0	0	0	2	0	2
OCPFDLNE_01392	0	0	0	0	0	0	0	0	0	0	0	0	3	0	0	0	0	0	0	1	0	0	0	0	0	0	0	0	2	0	0	0	0	0	0	0	0	0	0	0	0	0	0	0	0	0	0	0	0
OCPFDLNE_01393	0	0	0	0	0	0	0	1	0	0	0	0	3	2	0	0	0	0	0	0	0	0	1	0	0	0	0	0	0	0	0	0	0	0	0	0	1	0	0	0	0	0	0	0	0	0	0	0	0
OCPFDLNE_01394	0	0	0	0	0	0	0	0	0	0	0	0	7	0	0	0	0	0	0	0	0	0	0	0	0	0	0	0	0	0	0	0	0	0	0	0	0	2	0	0	0	0	0	0	0	1	0	1	0
OCPFDLNE_01395	133	104	71	39	56	79	71	143	140	120	101	191	268	95	172	303	199	57	29	221	96	169	156	220	270	167	242	166	222	134	102	219	143	98	167	206	205	198	225	236	260	329	301	373	252	162	282	594	228
OCPFDLNE_01396	225	225	146	83	116	261	245	321	274	263	249	438	575	315	333	557	370	195	74	321	173	355	239	531	435	252	471	285	275	181	185	365	398	202	273	309	358	343	290	307	427	393	459	487	312	231	428	710	281
OCPFDLNE_01397	466	541	343	231	257	607	369	608	501	381	499	799	961	159	577	1118	784	113	202	755	350	661	564	1289	1046	672	1268	676	688	409	358	727	757	423	553	616	714	717	585	701	771	807	890	881	583	423	657	1041	533
OCPFDLNE_01398	9	11	6	1	2	9	10	27	11	20	23	35	44	22	23	31	20	9	3	29	20	24	11	27	37	16	29	10	8	6	7	13	19	6	9	10	8	6	8	20	11	12	11	16	23	8	7	42	10
OCPFDLNE_01399	2	1	1	2	1	8	2	6	3	6	4	8	9	1	4	9	6	0	2	9	9	7	5	27	12	13	24	11	5	1	2	1	2	1	5	2	6	4	5	4	4	3	7	7	4	4	6	10	5
OCPFDLNE_01400	4	4	7	0	2	4	8	6	11	9	4	16	16	3	5	16	9	3	0	7	7	8	12	35	21	12	34	4	3	6	2	4	3	3	1	2	3	3	4	2	6	8	6	9	7	4	8	13	2
OCPFDLNE_01401	54	35	31	26	27	58	35	38	60	44	50	83	87	13	40	74	47	14	17	72	36	61	63	113	83	58	57	55	82	48	33	65	63	29	42	50	57	47	44	55	74	58	67	61	49	39	47	111	45
OCPFDLNE_01402	46	30	23	15	16	40	40	66	64	68	57	106	115	43	66	86	65	30	13	66	42	49	47	102	89	50	87	59	55	35	39	44	85	22	27	55	57	41	44	57	37	65	48	67	72	38	58	146	43
OCPFDLNE_01403	35	23	12	12	11	35	34	57	59	45	35	73	119	25	74	79	98	16	12	68	36	52	64	59	62	50	58	26	40	28	29	39	37	22	37	40	52	35	37	50	41	48	57	73	76	36	42	150	42
OCPFDLNE_01404	46	60	39	16	31	55	50	78	88	73	89	114	184	63	112	214	140	32	28	149	64	96	108	206	185	100	149	81	69	48	40	74	86	42	57	73	79	77	75	69	80	96	93	126	57	60	71	162	59
OCPFDLNE_01405	28	27	21	11	13	38	23	36	41	28	35	42	72	45	37	63	48	21	14	63	39	33	59	104	74	51	72	36	46	18	25	46	45	18	29	38	36	40	33	33	36	33	28	41	29	13	21	76	25
OCPFDLNE_01406	5	9	2	2	5	15	13	23	11	25	10	35	25	28	14	34	18	12	3	34	11	12	17	29	22	19	27	7	14	8	8	8	10	11	11	7	12	9	11	10	15	12	14	21	9	10	11	39	12
OCPFDLNE_01407	16	12	10	6	5	15	19	28	35	21	22	38	52	21	32	59	43	11	1	29	16	28	15	29	75	23	25	32	28	14	19	19	14	16	16	18	27	16	20	30	31	31	31	32	29	12	24	76	13
OCPFDLNE_01408	13	24	11	8	6	21	11	23	27	18	15	36	32	16	27	58	28	13	13	33	19	32	24	39	40	17	28	26	14	10	18	32	32	10	18	21	12	17	20	11	26	25	19	26	16	14	14	42	15
OCPFDLNE_01409	5	4	6	6	3	8	5	15	10	9	6	15	25	12	10	18	18	5	3	17	6	9	20	31	15	10	15	14	17	9	9	11	21	8	7	17	16	8	5	7	12	17	16	22	14	5	11	27	11
OCPFDLNE_01410	31	20	10	7	11	8	17	29	39	29	25	45	73	10	29	51	33	3	11	36	21	30	37	48	49	43	44	34	23	8	16	33	49	14	16	29	34	26	30	24	30	29	25	48	33	15	25	54	23
OCPFDLNE_01411	175	261	222	158	274	694	641	1061	664	679	582	1315	2015	295	491	211	529	434	119	337	343	202	172	322	221	127	176	144	76	74	210	132	249	71	101	119	286	117	170	196	82	95	106	146	148	148	134	478	178
OCPFDLNE_01412	22	27	14	12	10	32	30	41	59	31	60	53	80	39	55	79	65	13	67	147	97	97	184	458	168	143	272	34	37	23	9	36	26	22	22	34	44	43	38	28	31	47	44	49	32	17	21	74	25
OCPFDLNE_01413	11	6	13	10	7	11	10	27	19	18	27	33	18	5	18	25	20	9	21	58	52	35	57	165	62	79	115	13	8	10	7	5	10	8	14	13	12	11	6	11	18	17	10	17	11	13	10	32	7
OCPFDLNE_01414	20	16	7	8	19	26	14	26	30	27	13	60	56	37	25	64	17	17	8	35	22	39	20	36	57	32	41	28	21	13	22	19	34	6	21	27	25	18	17	29	19	19	20	21	26	7	23	58	15
OCPFDLNE_01415	203	129	92	87	85	150	102	162	136	115	126	224	194	37	99	154	114	24	42	211	144	186	144	381	250	175	235	194	143	91	137	138	193	62	80	138	118	131	110	148	119	145	133	106	117	88	100	261	90
OCPFDLNE_01416	6	7	6	4	4	7	13	13	9	9	8	15	54	2	29	53	39	2	1	13	9	15	17	35	14	14	19	14	15	6	9	29	22	11	7	5	15	14	14	12	21	19	21	23	21	17	36	47	13
OCPFDLNE_01417	19	14	9	8	11	16	28	33	36	30	37	39	91	35	46	79	46	15	9	67	26	38	41	38	62	45	31	13	13	6	14	20	21	9	17	15	28	11	18	27	32	32	32	55	43	36	40	63	28
OCPFDLNE_01418	68	73	50	26	33	47	57	81	79	76	70	87	196	50	121	220	140	27	27	164	61	98	112	147	188	104	143	80	120	70	57	106	86	69	101	95	103	86	81	111	142	126	160	161	86	69	124	168	90
OCPFDLNE_01419	60	58	39	34	28	47	45	53	84	50	60	77	160	41	96	157	149	29	24	97	36	70	62	82	118	57	85	119	80	67	40	100	118	50	69	76	106	114	79	104	101	157	122	141	74	62	88	148	58
OCPFDLNE_01420	81	121	79	32	52	76	67	69	79	67	79	94	158	24	98	208	108	17	17	165	54	78	96	144	148	79	126	121	164	84	79	122	151	84	122	79	91	161	114	102	148	171	150	169	90	66	125	196	94
OCPFDLNE_01421	133	164	115	55	99	128	83	107	127	114	141	146	251	32	140	225	187	31	49	205	85	136	126	205	223	117	165	239	185	174	123	232	214	110	174	149	171	235	170	171	178	222	228	228	147	125	131	255	136
OCPFDLNE_01422	1	0	0	0	0	0	0	0	1	0	0	0	0	0	0	0	0	0	0	0	0	0	0	0	0	0	0	0	0	0	0	0	0	0	0	0	0	0	0	0	0	0	0	0	0	0	0	0	0
OCPFDLNE_01423	31	33	17	15	15	32	33	24	17	17	20	26	32	6	16	18	14	8	2	13	14	16	14	32	18	18	33	37	48	12	13	26	33	15	30	25	24	36	10	32	40	24	22	31	26	13	21	27	10
OCPFDLNE_01424	102	121	65	34	51	134	118	167	169	136	143	247	244	95	135	254	170	55	30	204	112	208	194	271	319	148	267	180	152	117	85	132	191	81	108	80	135	141	80	154	170	199	190	193	187	109	142	276	113
OCPFDLNE_01425	22	14	19	11	7	32	29	22	36	36	25	65	68	21	32	53	40	19	12	65	29	61	39	78	95	44	63	33	25	19	13	18	49	21	27	21	22	30	22	37	36	46	38	56	46	34	47	69	29
OCPFDLNE_01426	70	63	45	28	22	65	71	76	70	74	95	95	142	56	59	102	66	31	19	85	51	81	70	130	121	75	97	84	72	40	29	71	69	36	54	50	67	59	54	73	76	94	72	105	62	45	57	113	44
OCPFDLNE_01427	167	178	81	60	69	146	88	116	123	108	83	204	220	107	81	218	96	71	17	139	46	136	121	201	216	107	218	202	184	106	99	182	285	88	102	130	146	148	125	145	182	163	210	213	159	88	136	282	77
OCPFDLNE_01428	41	39	26	17	18	53	19	37	24	30	15	72	79	35	18	45	23	23	5	30	18	30	26	50	50	33	34	38	33	16	21	31	35	23	23	38	46	36	42	51	42	29	38	49	27	28	34	68	21
OCPFDLNE_01429	14	14	6	14	11	19	12	16	17	14	10	20	27	39	10	32	18	17	2	22	8	29	12	19	33	12	14	17	8	5	9	14	22	6	13	13	22	11	11	19	20	15	19	33	19	4	10	37	16
OCPFDLNE_01430	38	16	14	12	13	25	22	32	34	22	43	40	63	5	24	62	38	3	9	63	20	62	40	45	83	33	47	28	15	22	25	24	28	7	19	19	30	22	15	34	41	47	31	40	51	29	27	55	22
OCPFDLNE_01431	39	55	39	11	25	71	60	82	68	59	62	106	98	21	58	157	68	6	20	147	69	119	115	241	235	107	157	77	76	55	38	106	116	42	53	62	96	75	77	82	77	92	113	107	101	58	64	126	48
OCPFDLNE_01432	12	14	7	5	4	15	8	7	21	20	15	19	23	15	15	25	20	8	3	28	12	13	12	19	29	22	27	18	9	7	4	11	21	8	12	11	12	6	13	12	17	20	14	19	7	13	20	35	6
OCPFDLNE_01433	24	26	20	12	17	41	25	50	55	50	38	82	127	17	66	82	62	26	16	56	32	39	47	44	61	41	43	36	30	22	28	50	48	22	25	66	66	38	38	57	35	67	62	62	37	46	63	117	42
OCPFDLNE_01434	74	51	33	29	32	84	51	90	108	62	80	140	166	47	80	124	113	26	36	142	109	112	143	191	199	146	196	71	63	32	51	93	124	39	72	60	83	79	52	91	79	97	70	95	89	73	65	181	55
OCPFDLNE_01435	10	10	4	2	3	12	5	11	8	6	9	31	19	1	5	14	6	2	6	11	13	5	16	11	30	7	13	14	6	10	3	4	25	5	4	6	11	11	6	12	7	12	14	9	8	7	3	28	8
OCPFDLNE_01436	236	260	187	102	125	265	226	399	356	286	291	492	651	631	354	777	519	454	31	367	147	237	249	320	402	210	349	391	282	224	136	366	437	216	292	264	432	383	338	427	483	507	439	566	385	301	359	759	363
OCPFDLNE_01437	18	26	9	8	3	18	30	28	28	21	30	57	69	46	37	46	42	31	2	35	12	20	16	33	30	26	33	39	24	11	13	25	40	16	27	17	22	30	37	28	37	39	48	45	31	37	29	65	32
OCPFDLNE_01438	7	15	8	2	4	12	8	25	13	26	17	30	49	64	26	52	30	29	3	30	11	19	17	29	35	14	30	21	17	14	9	25	29	16	23	19	23	21	32	21	26	29	32	21	23	12	32	40	14
OCPFDLNE_01439	6	9	8	7	5	10	8	18	8	18	15	9	26	22	6	26	14	20	2	12	4	21	9	11	21	11	11	16	8	8	6	15	20	6	13	9	10	12	10	7	14	11	17	10	8	15	5	23	9
OCPFDLNE_01440	18	29	10	11	9	24	30	46	43	41	28	65	78	18	41	55	35	12	9	61	31	38	33	69	69	26	48	46	32	27	18	27	33	10	27	28	40	36	38	36	34	54	41	61	53	25	42	89	30
OCPFDLNE_01441	22	30	16	13	11	30	28	37	33	36	37	69	56	12	30	77	46	8	18	39	34	48	39	68	67	51	56	43	32	16	18	38	32	19	24	27	35	32	25	40	30	38	29	51	35	17	20	69	22
OCPFDLNE_01442	77	60	44	38	52	92	45	95	111	111	93	153	194	66	112	203	141	48	32	196	97	136	125	259	192	142	222	112	95	72	50	106	141	58	69	82	107	135	102	106	135	119	120	153	104	64	96	209	85
OCPFDLNE_01443	59	74	46	31	26	60	45	67	82	73	79	79	108	95	98	143	128	93	44	161	101	110	117	230	212	168	189	92	100	60	56	74	87	61	72	56	97	96	65	54	89	104	94	110	72	80	87	172	75
OCPFDLNE_01444	4	12	3	5	7	9	5	22	9	5	12	21	48	25	22	28	15	19	1	9	8	8	9	16	21	6	11	2	2	5	8	4	10	3	3	7	6	6	5	5	6	11	15	16	5	1	9	29	2
OCPFDLNE_01445	25	22	14	12	12	15	16	11	21	21	11	36	45	5	20	31	24	1	1	16	3	12	12	18	13	8	11	24	27	17	12	19	42	12	22	18	15	35	25	30	31	28	35	37	25	23	29	49	23
OCPFDLNE_01446	187	201	131	71	79	187	184	270	377	257	285	403	571	83	257	590	371	59	79	541	267	385	348	599	736	378	478	224	205	104	101	206	271	111	158	101	207	212	129	194	265	195	212	237	167	141	183	330	157
OCPFDLNE_01447	824	779	558	320	358	658	474	605	771	604	623	785	1260	858	685	1404	897	582	210	1067	552	765	763	1251	1271	789	1074	943	870	595	493	942	1091	535	727	591	887	932	732	690	990	1071	1153	1217	686	628	760	1323	668
OCPFDLNE_01448	4	2	6	5	4	0	10	13	12	9	11	14	17	4	8	16	14	2	4	7	6	6	16	4	20	18	5	14	7	10	2	12	16	9	9	7	16	13	6	12	21	19	16	7	16	10	10	22	6
OCPFDLNE_01449	11	18	9	5	3	23	13	20	26	23	30	41	50	12	25	38	43	15	3	43	16	35	29	37	51	16	34	27	24	15	7	19	23	17	18	12	27	24	23	23	26	29	27	35	29	11	15	38	16
OCPFDLNE_01450	14	16	12	5	8	17	16	34	36	24	18	31	39	26	24	40	39	17	4	40	13	17	13	43	64	27	29	15	15	22	13	27	31	9	11	16	25	22	20	15	15	23	24	22	18	11	17	46	24
OCPFDLNE_01451	31	42	18	23	27	38	38	35	49	40	43	67	106	31	57	111	62	22	13	64	37	58	57	82	106	44	70	56	42	26	22	46	47	14	41	38	55	44	35	53	65	56	57	71	53	32	44	136	48
OCPFDLNE_01452	48	27	20	13	14	35	24	38	42	35	32	43	87	32	60	94	54	23	8	68	34	61	70	121	87	78	90	64	46	41	23	59	43	29	44	33	47	57	33	53	65	67	69	70	34	39	68	98	42
OCPFDLNE_01453	16	12	9	9	7	15	9	16	17	13	15	25	35	9	16	31	23	3	8	21	12	22	15	46	32	15	26	29	20	11	12	17	33	7	8	11	19	12	14	16	21	18	13	24	9	19	21	25	12
OCPFDLNE_01454	1664	1804	1077	826	789	1917	1490	1801	1491	1334	1101	2598	3839	1463	1620	3510	2096	1033	392	2440	1067	2426	1588	2648	3046	1729	2492	2036	1673	1070	864	1964	2321	1229	1547	1715	2305	2116	1524	2263	2410	2188	2527	2575	1791	1439	1779	3652	1430
OCPFDLNE_01455	776	687	456	298	284	691	338	489	343	367	304	599	784	458	388	751	427	399	80	579	308	550	405	685	632	396	667	669	556	449	374	612	819	382	430	466	583	573	366	531	523	461	598	563	387	336	369	599	330
OCPFDLNE_01456	7	7	7	6	4	7	7	13	13	7	12	20	24	7	5	13	15	8	3	9	8	7	3	10	25	8	5	10	4	3	13	3	11	0	6	4	8	3	4	7	8	10	7	9	8	2	10	20	4
OCPFDLNE_01457	1	2	3	1	1	0	2	3	5	2	2	3	13	1	3	8	2	1	5	11	2	6	4	8	7	4	5	2	1	1	2	4	2	1	7	3	5	4	2	3	4	2	3	9	5	1	6	8	3
OCPFDLNE_01458	0	1	1	0	1	3	0	2	1	0	1	8	9	0	2	4	2	0	0	2	2	0	1	3	4	1	4	0	2	1	1	1	3	0	3	0	2	0	2	2	0	2	4	0	0	0	1	5	2
OCPFDLNE_01459	0	1	0	1	0	0	0	1	1	2	0	2	2	0	1	2	6	0	1	1	1	4	3	3	3	3	1	2	3	1	1	0	0	2	3	1	2	3	1	0	4	1	2	2	1	1	2	6	3
OCPFDLNE_01460	2	2	0	1	1	1	2	1	0	4	1	5	3	0	3	0	1	1	1	4	0	3	1	4	3	2	2	3	9	1	6	0	6	2	3	4	1	0	3	4	6	1	5	2	0	2	1	3	2
OCPFDLNE_01461	11	7	7	6	2	9	5	13	14	7	9	12	24	27	12	14	9	18	4	33	23	34	30	55	29	30	40	9	12	13	11	13	18	8	14	17	12	15	9	14	23	25	7	13	20	6	22	25	4
OCPFDLNE_01462	82	94	63	61	69	128	112	174	165	129	133	232	275	75	154	198	161	57	48	216	132	187	181	327	249	185	247	106	108	71	69	144	126	69	92	99	109	107	92	146	130	132	134	166	147	77	131	220	89
OCPFDLNE_01463	85	91	45	26	32	82	76	138	109	111	122	179	195	25	96	251	138	24	19	101	61	108	81	119	159	94	104	70	83	49	61	101	141	61	67	85	87	71	78	115	119	112	116	126	93	79	105	228	94
OCPFDLNE_01464	9	8	9	4	5	13	24	28	35	15	21	39	53	3	39	71	41	6	6	49	24	27	37	121	68	31	66	13	8	8	9	10	15	3	9	14	19	3	17	8	15	12	14	26	12	6	8	40	7
OCPFDLNE_01465	2	3	2	2	4	2	0	7	3	4	4	5	21	3	9	19	6	2	0	4	0	9	7	14	8	2	8	4	2	1	0	2	5	6	2	4	5	3	5	6	3	9	6	7	8	3	6	15	2
OCPFDLNE_01466	8	2	1	2	3	5	6	2	1	6	1	11	19	5	6	6	6	5	4	10	4	3	9	9	8	3	13	6	4	6	4	7	4	7	1	12	6	4	1	4	8	11	16	10	6	8	12	15	5
OCPFDLNE_01467	5	5	3	4	4	13	8	19	16	10	9	18	32	22	12	39	25	16	1	33	6	22	27	46	42	17	30	8	10	1	6	8	10	7	6	7	15	9	7	13	8	18	20	12	10	4	9	34	15
OCPFDLNE_01468	6	6	5	4	7	7	15	15	21	20	21	27	48	11	31	28	29	3	7	27	19	15	23	39	30	19	32	20	16	9	7	23	29	8	14	14	17	12	7	20	31	31	15	18	27	17	26	54	15
OCPFDLNE_01469	33	25	23	11	13	41	22	37	26	34	26	62	85	10	35	47	42	8	5	42	23	34	46	75	42	27	70	37	49	35	20	40	53	30	36	26	33	53	51	81	71	60	74	73	73	37	58	85	51
OCPFDLNE_01470	47	28	24	12	14	32	22	40	38	32	30	62	70	12	36	57	47	10	7	47	34	34	41	69	62	42	55	34	32	19	19	23	27	19	24	35	37	47	35	59	38	49	42	48	41	29	42	103	39
OCPFDLNE_01471	640	604	416	285	287	694	520	740	791	495	520	1034	958	1240	589	876	657	846	67	688	393	511	397	738	882	371	491	662	714	373	606	584	933	305	447	641	736	486	613	795	722	677	657	665	688	410	544	1746	460
OCPFDLNE_01472	62	64	36	25	40	71	67	118	85	83	92	179	218	86	127	185	120	47	16	138	58	134	141	147	230	92	114	86	93	41	48	95	96	48	77	74	105	86	90	130	152	130	183	172	137	83	111	268	91
OCPFDLNE_01473	20	44	29	8	20	55	25	46	35	40	40	80	82	55	49	90	61	42	8	53	20	39	32	45	67	29	46	54	38	34	32	44	75	36	39	45	41	48	40	45	43	56	52	72	41	22	43	70	25
OCPFDLNE_01474	51	52	55	25	32	53	49	52	55	49	57	71	115	121	75	144	97	85	11	71	28	44	45	98	95	49	71	107	101	53	51	106	83	46	89	88	98	121	88	85	110	129	116	158	65	68	99	134	67
OCPFDLNE_01475	21	38	30	9	10	22	18	30	35	26	24	63	62	29	25	85	64	19	9	43	11	29	19	29	42	28	44	59	39	33	21	51	78	42	31	27	47	66	48	53	56	54	72	77	38	39	55	89	46
OCPFDLNE_01476	60	65	48	22	43	85	71	84	79	80	80	170	240	63	106	183	138	65	10	76	29	52	60	60	99	43	53	149	115	79	75	153	197	76	103	123	164	180	142	133	144	198	179	225	194	140	149	364	157
OCPFDLNE_01477	0	2	1	0	0	0	0	1	2	1	5	0	9	2	0	3	4	0	0	0	1	0	2	0	2	0	0	0	5	0	0	3	3	0	1	0	2	1	1	0	1	1	1	3	3	1	1	2	0
OCPFDLNE_01478	1	0	0	0	0	1	2	1	0	0	0	2	1	0	0	0	1	0	0	0	0	0	0	1	1	1	0	0	0	0	1	0	0	1	1	0	1	0	0	1	0	4	0	3	0	0	0	2	1
OCPFDLNE_01479	39	58	24	18	24	71	63	107	108	78	92	169	238	73	77	201	119	53	23	102	43	51	86	152	122	60	117	63	54	45	36	75	113	40	48	55	81	72	72	63	88	112	105	139	104	44	87	189	45
OCPFDLNE_01480	190	183	105	89	110	210	142	183	212	153	181	331	379	153	212	302	223	105	31	241	153	180	148	270	256	174	235	248	282	160	154	244	339	131	197	225	216	242	169	311	276	287	307	290	234	169	297	434	175
OCPFDLNE_01481	198	171	106	83	80	205	127	128	124	139	102	218	301	11	159	174	182	11	24	138	81	146	123	177	178	116	149	270	302	135	165	238	290	121	200	234	226	225	198	400	330	368	340	414	264	194	294	490	224
OCPFDLNE_01482	106	121	82	41	55	112	90	127	133	102	87	169	186	134	109	230	143	115	40	147	95	90	119	246	176	102	194	146	148	93	74	134	172	65	106	116	134	137	116	127	147	125	152	181	95	103	134	280	110
OCPFDLNE_01483	31	22	13	11	21	22	24	28	29	21	24	39	64	66	29	50	55	29	2	32	15	15	26	42	40	20	27	36	36	18	16	27	36	18	36	22	36	35	23	36	48	30	45	41	22	29	31	58	27
OCPFDLNE_01484	31	32	29	15	16	58	34	65	72	45	50	80	143	54	56	139	87	40	17	60	42	80	79	111	73	67	90	48	49	31	34	58	78	39	33	43	40	54	59	56	66	82	72	114	65	49	82	137	54
OCPFDLNE_01485	10	9	8	10	9	16	21	21	30	20	13	45	70	29	18	48	34	18	1	28	18	25	22	42	62	23	41	20	26	15	11	15	32	4	15	21	26	27	22	33	34	54	34	27	33	18	32	114	28
OCPFDLNE_01486	59	67	33	25	33	76	67	116	118	106	116	172	173	93	98	194	128	47	10	124	65	124	112	211	212	100	216	99	67	45	58	87	134	41	69	54	102	88	73	101	116	93	114	167	105	69	92	173	74
OCPFDLNE_01487	348	393	284	177	264	577	423	475	491	427	389	702	884	324	413	679	519	248	37	322	119	255	177	201	313	135	170	571	504	370	243	585	818	355	390	316	590	560	415	384	413	486	453	435	315	272	306	610	260
OCPFDLNE_01488	40	40	32	22	19	47	44	92	83	45	69	119	152	54	82	156	108	25	8	98	46	51	78	109	94	53	79	52	34	24	34	51	77	20	32	53	68	33	67	57	49	60	59	58	57	32	57	199	29
OCPFDLNE_01489	0	1	0	0	0	0	0	2	0	0	1	0	6	1	3	2	0	3	1	0	1	4	2	1	0	0	1	1	0	0	0	1	0	0	0	0	0	0	1	0	0	1	1	0	1	0	1	2	0
OCPFDLNE_01490	0	1	0	0	0	0	0	0	0	0	0	0	0	0	0	2	1	1	0	1	0	0	1	1	1	2	1	2	0	0	0	1	0	0	0	0	0	0	0	0	0	0	1	1	2	0	0	0	1
OCPFDLNE_01491	0	0	0	0	0	0	1	2	0	0	0	0	3	0	1	1	0	0	0	0	0	0	1	2	0	1	0	0	0	0	0	0	0	0	0	0	0	0	0	0	0	0	0	0	0	0	0	0	0
OCPFDLNE_01492	0	1	0	0	1	1	1	0	1	0	0	3	3	1	1	2	1	1	0	0	2	0	2	4	0	3	2	0	0	0	0	0	0	0	0	1	0	0	0	0	0	1	0	0	0	0	0	1	0
OCPFDLNE_01493	10	5	3	1	5	14	7	21	22	10	18	30	25	13	15	23	19	7	2	16	18	17	15	52	33	24	26	9	6	6	5	2	6	1	5	7	15	4	6	7	6	9	11	10	6	5	6	15	6
OCPFDLNE_01494	15	8	11	2	10	9	15	20	21	14	15	42	38	17	11	18	13	13	15	26	14	19	29	57	41	22	55	8	16	11	2	11	13	3	5	15	6	13	6	7	11	13	8	20	5	7	10	33	1
OCPFDLNE_01495	22	26	15	10	21	27	30	52	60	46	32	92	63	53	25	37	33	35	16	47	39	35	81	214	102	86	118	30	17	16	16	32	39	14	6	15	22	18	21	25	32	42	27	36	59	15	25	48	8
OCPFDLNE_01496	35	36	32	19	16	37	37	64	49	31	58	51	97	54	52	97	72	56	11	55	36	46	39	84	101	47	84	44	28	19	23	43	70	27	30	20	43	27	28	41	46	45	53	76	42	32	39	93	43
OCPFDLNE_01497	12	26	18	7	12	25	13	29	31	21	20	31	67	13	41	59	49	11	4	48	16	27	19	37	55	29	32	26	14	11	19	25	19	17	17	15	35	28	41	34	23	21	20	52	29	17	13	67	31
OCPFDLNE_01498	34	39	42	12	21	62	57	79	107	58	59	135	172	43	92	159	122	32	10	147	68	73	106	140	174	93	126	64	65	45	36	67	100	39	55	56	90	63	50	55	59	74	81	123	82	40	65	190	63
OCPFDLNE_01499	6	5	5	2	3	3	8	3	5	9	9	13	12	14	5	8	12	7	1	13	3	11	17	23	15	6	8	7	1	6	3	10	6	3	0	3	6	4	5	7	6	6	5	7	8	4	1	22	6
OCPFDLNE_01500	125	73	50	32	35	78	48	91	68	48	58	109	149	21	83	123	113	22	5	76	51	66	42	116	124	51	132	107	104	59	72	86	130	51	64	100	124	91	95	146	112	126	98	149	91	64	102	282	87
OCPFDLNE_01501	12	19	10	5	5	16	23	15	18	25	16	39	61	18	25	29	25	21	1	21	10	30	19	30	26	6	18	21	20	9	17	18	16	7	14	14	18	16	16	24	23	29	23	27	23	28	28	70	20
OCPFDLNE_01502	1237	1273	876	526	600	1539	780	979	848	921	713	1429	1448	1368	653	948	778	980	151	1071	581	962	619	1475	970	684	1120	1788	1563	1000	741	1434	2253	719	1012	947	1272	1136	902	1353	1429	1218	1267	1390	878	776	967	1695	871
OCPFDLNE_01503	45	42	31	24	19	43	40	49	66	61	61	96	130	99	86	135	113	56	14	82	34	58	69	135	79	70	136	75	71	42	50	80	134	47	55	73	92	79	62	69	102	115	108	98	60	63	79	175	64
OCPFDLNE_01504	11	17	1	4	2	14	17	13	12	10	12	28	38	17	13	41	26	18	2	16	3	7	16	40	26	18	28	13	22	5	10	15	16	11	12	23	22	18	13	18	19	21	19	47	27	18	24	58	20
OCPFDLNE_01505	17	14	3	5	7	15	12	10	17	12	15	27	30	2	12	28	15	0	3	21	8	17	16	44	19	15	45	19	15	10	7	14	28	8	8	12	20	13	19	14	10	28	19	20	15	14	14	41	15
OCPFDLNE_01506	12	16	6	5	9	30	10	17	17	14	16	17	25	0	16	28	26	0	0	32	23	27	19	52	17	14	49	10	20	6	10	19	22	6	11	14	13	30	15	23	16	22	28	23	12	17	21	29	11
OCPFDLNE_01507	2	3	4	2	0	3	3	9	6	2	2	7	25	2	6	4	12	2	0	6	8	6	6	15	11	12	10	4	5	2	1	5	5	6	3	2	2	7	4	7	4	4	4	8	3	3	9	9	5
OCPFDLNE_01508	71	57	31	37	38	75	76	84	76	66	59	117	106	12	50	62	63	7	14	76	28	51	40	67	83	38	64	99	104	49	60	82	154	44	57	82	60	64	49	85	113	68	76	68	51	61	69	112	34
OCPFDLNE_01509	3	4	2	3	3	9	2	8	14	9	4	13	23	5	9	8	8	2	2	10	5	9	3	12	13	8	10	5	10	0	0	6	6	3	4	0	7	2	6	8	7	4	3	4	10	3	4	14	1
OCPFDLNE_01510	39	43	21	13	36	48	40	62	57	43	52	81	111	114	61	89	73	85	10	93	46	82	45	85	93	49	62	50	54	33	30	40	72	32	35	44	56	44	41	58	60	71	58	61	38	36	43	104	26
OCPFDLNE_01511	44	30	23	14	17	47	31	39	18	28	25	53	69	29	35	67	46	44	1	46	24	32	32	72	52	34	34	55	50	30	35	60	58	27	36	45	63	51	68	56	64	64	83	95	75	53	70	179	52
OCPFDLNE_01512	13	16	12	7	8	20	13	11	7	19	14	14	29	15	22	32	21	9	2	13	12	17	15	17	19	15	27	13	19	7	9	16	19	14	8	17	15	21	21	15	24	22	30	14	21	13	15	48	16
OCPFDLNE_01513	32	29	24	13	11	29	28	48	41	39	38	53	92	28	29	63	66	18	4	60	52	65	62	123	107	50	115	45	31	23	27	31	61	22	24	35	37	35	42	50	44	55	56	49	48	26	43	97	33
OCPFDLNE_01514	187	146	97	68	61	156	138	179	187	165	163	310	424	167	231	387	274	119	37	322	224	302	322	609	541	327	561	203	200	138	164	265	255	124	196	206	210	239	198	290	342	292	328	399	252	182	235	514	165
OCPFDLNE_01515	43	40	28	17	18	63	52	78	69	51	57	133	154	84	72	96	76	57	8	104	66	99	73	128	164	64	121	42	54	29	32	53	80	31	52	56	56	54	69	90	82	120	81	120	110	61	86	184	53
OCPFDLNE_01516	622	810	396	201	214	926	452	732	500	417	356	948	617	254	253	429	287	306	23	317	172	264	148	307	472	149	255	812	537	338	470	496	1289	194	231	407	527	301	418	414	337	336	284	309	298	194	178	855	239
OCPFDLNE_01517	1336	836	680	454	544	1288	515	811	739	545	517	1133	715	483	453	556	464	384	67	493	364	366	248	430	586	269	311	1010	778	428	784	586	1192	305	381	612	686	432	551	628	372	451	388	460	386	287	343	1205	284
OCPFDLNE_01518	6	3	4	3	2	6	3	7	7	5	5	9	9	3	10	5	10	3	8	36	18	24	17	34	38	21	21	9	2	7	2	5	1	4	5	5	5	3	1	3	6	2	6	3	3	1	5	12	3
OCPFDLNE_01519	6	1	5	2	3	2	4	6	13	2	6	3	18	0	3	17	5	0	6	49	7	42	24	36	41	25	35	7	8	4	10	6	2	8	2	5	6	2	7	8	16	9	17	8	4	2	6	22	2
OCPFDLNE_01520	55	44	37	27	21	54	24	47	44	35	51	71	74	59	66	97	44	37	67	245	116	141	129	385	307	179	237	69	48	57	34	38	102	27	51	30	43	39	49	62	50	35	50	47	47	32	43	103	55
OCPFDLNE_01521	139	121	91	47	68	114	96	200	277	102	284	212	296	324	173	328	137	241	239	813	408	664	448	1171	1321	676	728	167	140	101	116	111	264	66	96	137	134	141	142	164	182	150	130	185	128	115	135	325	138
OCPFDLNE_01522	27	13	7	9	4	12	14	45	73	16	51	30	47	55	32	57	28	32	31	137	61	99	60	182	259	81	79	21	25	11	18	14	43	8	14	23	25	21	9	22	38	18	28	23	19	11	10	46	9
OCPFDLNE_01523	17	32	23	8	8	28	30	120	149	46	130	107	101	71	56	131	70	54	67	267	103	168	68	219	437	161	163	34	31	13	21	16	41	11	20	15	27	31	17	26	26	19	30	33	20	23	19	69	17
OCPFDLNE_01524	17	21	10	6	15	22	15	31	34	26	30	34	37	13	20	39	23	5	7	27	23	35	35	57	59	42	62	22	26	16	15	13	40	14	17	18	18	20	19	39	33	43	34	23	39	20	32	78	20
OCPFDLNE_01525	0	0	0	0	0	1	1	0	0	0	0	0	2	0	0	0	0	0	0	2	0	0	0	0	0	0	0	0	0	0	0	0	0	0	0	0	1	1	0	0	1	4	2	2	1	3	1	1	1
OCPFDLNE_01526	1	1	1	2	0	0	1	3	4	2	1	8	2	4	0	2	4	0	0	1	1	0	3	1	1	1	3	1	3	3	0	0	0	0	1	2	4	2	9	4	2	3	3	1	0	3	3	4	3
OCPFDLNE_01527	11	16	9	4	11	14	14	30	19	21	32	42	61	10	28	52	32	19	5	45	27	38	50	96	56	22	75	22	15	9	9	32	24	11	13	10	26	26	20	21	19	32	23	37	19	15	22	38	19
OCPFDLNE_01528	8	8	8	2	7	30	18	28	22	19	13	28	44	2	18	15	18	6	3	17	6	7	6	10	9	4	6	8	7	2	3	1	7	2	2	7	3	5	4	6	4	1	2	6	3	5	3	10	3
OCPFDLNE_01529	8	4	1	4	6	5	6	10	26	12	18	18	22	9	8	19	12	7	5	13	16	29	17	28	41	18	25	7	6	5	3	3	14	3	10	7	8	4	3	7	19	11	13	16	13	7	13	27	8
OCPFDLNE_01530	4	7	1	0	3	4	2	6	5	6	9	6	12	6	6	12	5	7	0	7	7	16	12	19	23	12	32	5	5	2	3	3	10	4	3	4	6	11	3	5	11	7	11	7	4	3	4	13	3
OCPFDLNE_01531	0	2	2	1	2	3	4	8	4	4	7	12	7	1	9	15	4	0	2	7	4	7	2	12	11	10	11	7	2	0	1	0	10	2	3	3	2	2	1	6	1	3	5	5	5	4	1	5	3
OCPFDLNE_01532	1	1	1	1	0	0	1	3	2	1	0	2	2	0	2	3	1	0	0	3	0	1	2	0	5	2	1	0	0	5	1	2	1	6	2	0	0	3	1	1	2	4	1	1	3	2	2	0	2
OCPFDLNE_01533	1	6	1	1	0	1	2	3	0	5	2	2	7	1	4	3	6	2	2	5	3	1	2	4	3	2	4	1	3	1	0	0	5	1	1	7	4	1	6	5	1	3	2	1	4	2	3	10	2
OCPFDLNE_01534	8	4	4	2	5	11	7	13	6	10	8	19	23	8	11	12	12	5	1	8	6	3	9	15	11	3	20	19	13	8	10	6	20	6	4	6	5	8	11	6	7	4	16	10	8	6	6	27	5
OCPFDLNE_01535	62	56	33	10	15	60	45	50	64	41	41	81	87	25	73	83	52	11	10	61	42	41	47	76	74	49	68	73	62	48	41	38	90	32	40	64	55	49	54	79	55	88	49	66	54	44	41	158	38
OCPFDLNE_01536	19	19	8	8	13	17	20	33	25	16	17	31	39	10	26	39	29	4	4	33	22	26	23	62	46	23	48	18	22	19	11	11	20	9	9	15	19	16	12	20	18	21	28	21	19	14	22	55	16
OCPFDLNE_01537	5	10	6	4	1	5	9	12	12	7	6	20	21	4	11	19	16	0	4	19	9	17	18	35	30	16	31	15	20	4	3	11	12	8	9	6	8	7	5	8	6	10	14	12	6	3	14	28	8
OCPFDLNE_01538	25	10	8	9	7	10	9	24	18	18	15	33	51	9	36	59	31	5	6	49	23	47	43	115	54	43	74	31	31	14	7	31	24	15	18	23	21	17	20	27	33	34	31	44	30	19	20	59	26
OCPFDLNE_01539	13	11	7	10	10	16	12	26	19	19	16	43	62	5	32	66	34	1	9	61	20	31	40	95	60	36	68	21	18	10	8	26	17	8	19	9	25	23	24	23	24	37	28	21	33	19	25	44	17
OCPFDLNE_01540	9	1	8	5	3	10	11	10	11	17	13	22	27	8	18	19	17	8	2	23	6	12	11	37	26	8	21	10	5	5	1	8	16	3	8	7	13	11	6	5	12	21	13	16	20	12	11	29	7
OCPFDLNE_01541	62	51	39	30	35	92	54	70	72	63	73	129	162	18	62	146	80	13	17	83	48	86	78	102	106	58	78	83	57	42	42	79	97	53	52	63	73	70	53	91	78	79	78	82	55	59	75	141	62
OCPFDLNE_01542	24	13	13	4	11	31	14	21	33	19	25	46	71	1	28	52	43	6	3	23	18	23	15	13	30	16	21	24	11	18	9	9	39	10	15	15	20	15	20	35	36	25	23	40	26	28	23	99	28
OCPFDLNE_01543	88	59	49	25	32	61	48	72	85	71	57	116	123	34	52	64	89	28	7	84	29	79	49	98	134	55	92	83	93	44	45	84	110	39	54	71	97	62	80	87	98	75	99	105	87	66	62	299	78
OCPFDLNE_01544	16	11	2	3	10	18	23	33	25	32	21	43	59	30	24	40	43	13	4	38	18	32	34	36	68	32	37	17	14	8	14	16	25	10	7	26	23	20	19	25	26	28	23	37	43	18	27	65	16
OCPFDLNE_01545	2	2	1	1	4	2	3	5	4	2	1	4	12	1	3	5	4	1	0	2	2	4	0	3	6	0	5	1	4	0	3	0	0	0	1	4	2	0	0	3	3	2	3	1	1	0	3	6	0
OCPFDLNE_01546	2	0	0	0	0	0	2	1	2	1	1	3	6	1	0	1	1	0	1	3	2	2	2	1	2	2	4	0	3	0	1	0	1	0	0	0	4	0	0	3	1	1	4	0	3	2	1	3	0
OCPFDLNE_01547	19	15	12	6	9	19	21	36	49	28	40	62	55	16	39	52	47	4	4	35	22	29	30	46	88	52	56	22	27	22	17	32	51	12	22	36	24	31	21	31	32	50	27	38	45	24	18	88	18
OCPFDLNE_01548	2	0	0	0	1	1	2	2	2	3	4	5	3	1	2	4	4	2	0	8	2	7	2	3	3	0	0	1	1	0	1	2	0	0	1	1	2	1	2	2	1	2	2	0	3	1	0	1	0
OCPFDLNE_01549	144	132	72	47	53	148	80	154	145	133	93	227	264	81	117	171	157	89	38	124	120	103	73	200	171	132	162	123	110	70	74	101	171	47	79	78	110	95	98	112	102	127	74	120	85	64	60	242	67
OCPFDLNE_01550	463	450	241	161	151	365	285	491	446	349	332	662	783	259	337	680	520	257	114	415	311	404	366	914	1077	460	728	576	415	314	324	556	911	197	325	375	517	453	471	435	488	497	436	730	514	273	365	1232	308
OCPFDLNE_01551	727	616	370	300	313	491	410	606	593	373	519	882	1209	550	553	914	715	330	157	736	428	629	691	1413	1159	805	916	763	775	463	589	781	840	331	535	644	705	671	734	880	831	854	888	886	831	535	697	1706	515
OCPFDLNE_01552	35	17	22	9	13	27	23	32	14	38	32	35	59	3	34	51	43	9	5	30	23	29	26	50	45	23	40	41	38	26	25	35	46	22	23	35	31	28	32	42	52	44	55	56	32	21	52	80	30
OCPFDLNE_01553	1	0	0	0	0	1	0	1	0	0	0	0	4	0	2	0	2	0	0	0	0	0	2	0	0	1	0	1	0	0	0	1	0	0	0	0	0	1	0	0	0	1	0	0	0	1	0	0	1
OCPFDLNE_01554	0	2	0	0	0	1	0	1	1	1	0	1	6	0	0	0	2	0	0	2	2	0	2	2	1	3	1	0	0	0	0	2	0	0	0	1	0	0	0	2	0	0	1	0	0	0	0	0	1
OCPFDLNE_01555	5	10	9	3	7	7	8	15	22	12	17	21	33	12	22	45	14	6	2	25	8	24	15	39	24	21	28	12	19	10	13	16	15	12	12	25	14	13	10	21	22	25	31	32	27	16	24	47	15
OCPFDLNE_01556	27	33	23	10	11	43	29	28	31	34	29	46	61	45	17	42	39	31	4	34	22	36	31	61	58	29	53	47	40	22	19	47	41	21	28	25	45	47	32	46	58	39	51	38	31	23	34	61	28
OCPFDLNE_01557	59	50	26	28	28	52	31	66	49	51	55	63	99	42	56	124	82	22	33	93	55	71	66	143	108	61	124	69	76	52	32	75	103	34	66	61	87	83	60	59	75	69	107	107	59	45	73	126	51
OCPFDLNE_01558	6	9	7	4	2	5	15	10	19	11	15	23	26	19	15	26	21	8	4	25	7	12	19	30	28	20	27	17	11	9	6	24	25	12	18	13	14	21	9	16	24	9	32	21	14	14	13	38	12
OCPFDLNE_01559	10	19	8	1	2	7	10	10	14	12	16	14	20	2	14	17	21	4	1	13	6	19	15	23	28	12	12	26	24	7	5	25	15	5	9	18	8	10	9	13	11	16	12	27	17	8	18	23	9
OCPFDLNE_01560	29	18	20	11	12	22	22	22	47	28	42	64	94	37	43	71	53	14	15	70	51	43	65	141	59	53	112	26	27	17	17	28	31	6	17	26	21	34	16	16	16	29	37	31	27	12	25	53	19
OCPFDLNE_01561	19	20	15	4	6	20	23	28	46	24	26	39	49	20	53	75	52	14	13	74	59	39	86	155	92	62	120	31	35	23	29	31	47	20	22	38	38	44	26	23	37	47	34	48	37	22	56	68	28
OCPFDLNE_01562	32	46	25	22	27	44	34	63	68	55	67	79	110	31	59	127	79	25	29	136	84	104	111	245	182	100	191	73	50	26	45	69	70	34	35	45	69	66	45	77	67	73	102	115	81	49	73	155	52
OCPFDLNE_01563	1	3	0	0	2	2	1	1	4	1	4	2	10	3	5	4	7	7	1	6	1	6	3	3	5	6	1	3	2	1	3	1	3	0	4	1	1	2	2	4	3	3	2	2	2	0	4	4	2
OCPFDLNE_01564	0	0	0	1	0	0	0	1	0	0	0	0	7	0	0	1	0	0	0	1	0	2	0	1	2	0	0	0	0	0	0	0	0	0	1	0	0	0	1	1	0	0	1	0	0	2	0	0	0
OCPFDLNE_01565	0	0	0	0	0	0	0	0	0	1	0	0	2	0	1	1	0	0	0	1	0	1	0	0	0	0	0	0	0	0	0	0	0	0	0	0	0	1	1	0	0	0	0	3	1	0	0	0	0
OCPFDLNE_01566	7	7	5	6	5	15	9	16	12	16	14	22	38	34	18	19	19	14	2	3	4	7	2	9	9	6	19	9	8	7	7	8	30	8	5	5	11	9	6	10	5	8	5	11	14	7	9	25	8
OCPFDLNE_01567	12	20	17	9	8	20	16	22	14	18	15	42	45	4	29	37	20	3	6	36	17	16	22	55	42	22	47	15	22	7	9	14	11	12	19	25	20	16	15	17	21	23	22	20	18	23	14	38	13
OCPFDLNE_01568	6	3	7	3	3	11	3	11	14	15	9	24	21	2	15	17	19	2	0	10	13	21	17	47	20	18	28	11	13	5	7	10	12	4	7	8	9	9	10	12	10	11	14	8	20	10	11	27	8
OCPFDLNE_01569	66	76	57	39	34	88	84	120	116	99	127	195	227	112	146	240	152	103	38	214	99	165	127	177	199	130	179	139	119	63	62	120	149	77	120	137	173	131	96	191	183	158	186	195	155	110	155	225	119
OCPFDLNE_01570	10	7	3	7	6	10	5	14	8	15	6	13	28	3	9	14	9	3	2	14	7	11	7	20	21	7	17	12	16	8	5	8	18	5	6	11	9	6	8	13	10	11	10	4	6	2	11	20	12
OCPFDLNE_01571	47	47	33	12	18	40	36	34	37	47	37	71	103	35	39	81	58	20	17	80	38	67	51	96	117	67	101	60	53	31	30	46	67	30	35	39	60	45	37	63	59	75	63	74	61	34	43	90	39
OCPFDLNE_01572	14	2	6	3	3	2	6	8	10	9	3	8	25	11	7	18	7	4	1	13	3	11	9	20	10	4	12	7	1	4	4	8	4	3	5	3	10	6	10	11	7	4	7	12	6	5	8	16	4
OCPFDLNE_01573	25	24	12	7	6	19	21	40	37	38	51	62	97	31	51	92	65	21	12	57	37	68	58	136	102	78	99	42	29	25	20	30	51	17	36	35	53	28	40	47	50	51	47	50	42	30	48	93	43
OCPFDLNE_01574	429	224	154	164	163	327	200	320	300	248	178	517	457	73	147	180	225	53	13	168	78	124	64	92	165	55	54	284	205	141	235	199	381	119	157	218	305	213	253	267	202	182	150	207	237	148	126	552	165
OCPFDLNE_01575	87	84	48	40	41	85	68	127	120	107	138	179	229	61	119	266	167	49	22	177	74	144	122	172	231	113	182	100	100	67	51	92	140	84	108	123	154	138	111	158	180	187	177	239	129	108	153	324	117
OCPFDLNE_01576	9	11	6	7	5	15	8	7	29	13	10	21	24	10	14	24	16	6	3	17	8	17	6	16	16	16	8	6	10	2	5	13	8	5	9	15	18	7	17	17	23	18	17	30	22	11	10	39	16
OCPFDLNE_01577	21	12	10	10	16	38	16	41	21	28	19	49	60	6	27	37	26	13	1	27	8	14	7	11	19	13	10	11	8	7	16	9	13	6	8	6	10	8	12	7	14	8	5	18	8	12	8	28	10
OCPFDLNE_01578	28	25	34	18	23	43	30	63	62	44	54	77	121	39	68	92	77	22	12	86	43	61	65	96	105	56	93	41	21	21	22	20	55	11	19	25	31	25	32	38	32	32	35	45	51	31	32	98	39
OCPFDLNE_01579	22	20	17	9	14	12	25	20	23	17	26	25	50	8	33	50	40	6	7	39	23	30	29	65	57	32	48	38	31	15	12	37	52	15	20	15	21	24	32	17	22	21	36	44	20	14	32	48	19
OCPFDLNE_01580	24	17	10	7	14	14	15	21	25	13	28	23	44	10	28	43	31	8	8	55	22	33	45	53	75	35	35	29	18	23	8	27	23	10	13	32	22	27	13	14	19	29	30	23	24	16	30	41	19
OCPFDLNE_01581	14	15	20	12	8	13	22	28	29	24	25	29	35	7	18	66	35	1	6	49	13	33	29	29	50	21	42	16	25	14	15	15	31	10	14	12	31	23	15	31	24	29	18	34	31	23	36	55	26
OCPFDLNE_01582	18	12	10	5	5	18	9	14	10	16	8	18	33	4	21	15	13	1	2	21	11	15	18	16	22	13	21	13	14	8	6	10	10	6	10	7	13	14	11	23	10	10	10	13	11	10	12	20	19
OCPFDLNE_01583	19	16	10	9	19	17	17	24	22	25	26	42	41	7	23	32	21	3	7	33	31	22	19	39	32	24	30	15	13	17	9	21	27	9	13	18	17	13	15	21	30	22	16	21	25	15	25	45	16
OCPFDLNE_01584	4	5	4	4	7	7	11	8	3	9	8	21	27	1	13	26	16	5	1	18	10	17	20	30	15	11	26	2	9	4	5	12	12	8	5	6	9	13	8	6	12	13	12	15	7	3	3	19	9
OCPFDLNE_01585	20	30	25	11	7	30	33	46	34	46	38	85	127	26	49	111	80	17	8	73	35	67	71	139	81	43	84	24	25	17	16	34	58	33	27	28	32	38	25	35	45	47	52	58	39	31	50	90	32
OCPFDLNE_01586	871	834	648	348	482	828	497	619	575	559	596	949	1572	772	897	1467	1273	630	75	1000	375	787	648	849	1041	514	918	1167	1196	706	497	1205	1477	714	912	814	1189	1224	958	1187	1483	1571	1639	1713	932	888	1213	1971	1087
OCPFDLNE_01587	615	685	520	343	364	571	477	568	499	541	463	699	1160	516	510	957	802	447	122	707	357	552	515	734	790	421	724	927	874	569	378	914	1180	613	735	641	853	1011	687	707	897	967	1102	1107	594	706	828	1221	752
OCPFDLNE_01588	45	47	41	20	27	102	72	120	72	72	86	173	211	35	86	131	84	22	12	117	67	64	59	93	130	53	85	60	40	22	41	47	76	25	30	31	62	36	50	69	41	66	49	67	63	30	45	172	56
OCPFDLNE_01589	63	137	101	41	31	172	172	315	343	270	282	349	447	141	247	494	322	92	58	311	197	235	283	465	538	271	331	218	212	142	185	199	280	88	159	167	236	182	226	274	243	208	225	310	262	188	236	729	207
OCPFDLNE_01590	149	134	84	66	91	128	134	250	238	155	181	302	386	95	176	343	263	81	46	250	141	248	170	335	432	191	265	136	109	81	116	146	279	56	91	92	156	125	127	161	166	197	156	244	200	134	146	521	114
OCPFDLNE_01591	9	16	4	7	11	10	7	17	12	14	11	22	33	2	19	34	22	5	4	19	16	24	27	33	39	37	45	17	19	12	13	14	21	5	14	16	16	13	13	23	11	17	20	17	15	14	13	35	12
OCPFDLNE_01592	14	26	5	3	10	9	7	35	36	24	19	36	57	12	29	60	37	16	0	15	13	26	22	34	52	20	38	10	14	9	5	14	22	7	12	13	16	8	11	19	24	28	21	20	28	13	21	74	26
OCPFDLNE_01593	8	1	3	2	3	4	6	4	7	10	5	6	33	1	18	14	10	0	0	12	13	15	16	14	20	3	8	8	9	1	2	9	12	9	3	9	8	10	7	9	11	18	13	11	11	6	23	35	15
OCPFDLNE_01594	4	9	2	5	6	15	11	12	17	15	19	20	37	6	25	29	17	7	1	25	15	17	12	35	22	10	29	5	14	4	5	14	33	9	13	5	10	13	7	5	10	10	14	13	11	7	11	26	9
OCPFDLNE_01595	30	30	30	16	17	49	35	58	31	43	39	73	128	40	65	92	66	21	10	81	44	65	72	123	105	70	113	43	48	22	21	39	55	29	33	41	51	39	48	35	47	59	45	64	42	30	35	120	32
OCPFDLNE_01596	45	38	27	24	28	60	55	69	46	81	63	111	181	59	85	117	98	40	7	98	66	106	81	139	119	83	161	72	53	47	38	48	98	36	46	39	57	50	57	80	80	56	81	77	90	35	69	174	65
OCPFDLNE_01597	1	0	0	0	0	0	0	0	0	0	0	0	0	0	0	0	1	0	0	0	0	0	0	1	0	0	1	0	1	1	0	0	0	0	0	0	0	0	0	0	0	0	0	0	0	0	0	1	0
OCPFDLNE_01598	0	0	0	0	0	0	0	0	0	1	0	0	3	0	0	0	0	0	0	0	0	1	0	0	1	0	0	0	0	0	0	0	0	0	0	0	0	0	0	0	0	0	0	0	0	0	0	0	0
OCPFDLNE_01599	2	3	0	0	1	0	4	4	2	0	5	3	9	1	4	7	4	1	0	3	0	2	1	3	3	3	1	3	7	4	4	3	10	1	2	0	5	2	4	2	1	3	6	0	4	2	3	9	5
OCPFDLNE_01600	32	42	26	21	27	30	28	47	23	22	40	61	86	14	40	68	54	10	9	42	18	38	36	70	56	19	47	52	47	17	31	29	69	14	24	29	28	27	27	36	28	38	34	42	38	29	27	91	20
OCPFDLNE_01601	51	52	23	21	19	24	26	45	40	35	43	57	117	49	64	158	72	59	19	71	32	67	51	89	106	44	63	56	53	37	38	63	68	35	44	30	50	65	62	42	57	50	73	95	36	40	69	117	52
OCPFDLNE_01602	12	18	11	8	4	12	18	28	22	11	19	31	65	20	27	66	51	24	0	27	4	12	13	11	31	6	18	14	16	14	21	25	31	7	17	20	18	17	36	10	20	31	19	41	27	23	31	86	35
OCPFDLNE_01603	6	12	4	3	1	6	8	8	7	3	12	10	29	4	21	42	33	6	2	22	6	14	10	18	18	8	6	16	24	10	7	21	24	11	18	19	24	14	8	17	20	31	25	37	25	13	24	58	35
OCPFDLNE_01604	9	6	6	2	5	7	11	4	17	17	12	26	37	16	22	69	32	27	1	19	3	11	10	14	23	10	10	14	10	5	9	15	7	7	10	10	15	24	12	18	15	22	31	23	14	17	19	49	21
OCPFDLNE_01605	17	12	10	6	5	16	39	23	32	43	34	65	124	19	64	130	92	11	5	50	19	47	33	33	65	23	25	18	25	9	25	25	22	15	23	33	53	36	48	65	64	58	69	65	73	44	62	170	36
OCPFDLNE_01606	10	12	14	2	4	15	31	34	36	32	17	45	65	16	38	56	33	12	5	26	16	24	28	46	51	23	48	22	21	12	8	32	30	7	15	16	26	25	19	17	27	32	19	30	51	19	25	80	15
OCPFDLNE_01607	23	19	11	4	12	9	15	22	17	10	20	36	60	10	21	50	33	16	2	35	26	39	30	61	36	27	80	21	18	16	8	19	32	13	8	16	15	18	12	18	26	20	16	30	18	20	37	38	18
OCPFDLNE_01608	64	65	51	23	24	68	54	68	83	45	52	73	104	56	63	139	79	30	16	87	60	92	77	155	126	77	172	105	78	71	62	82	88	48	66	72	93	89	57	85	81	117	87	136	57	53	64	136	59
OCPFDLNE_01609	73	57	54	22	26	56	63	54	67	70	57	84	146	22	79	127	104	13	22	143	86	118	124	178	224	105	188	107	146	111	75	136	100	90	125	122	133	153	111	128	161	171	211	199	132	114	157	239	115
OCPFDLNE_01610	57	49	29	14	22	51	43	50	69	51	37	79	98	32	65	62	48	24	14	71	33	58	69	107	113	47	77	106	77	49	80	78	98	59	65	99	103	91	68	96	105	109	129	133	129	63	114	189	62
OCPFDLNE_01611	24	24	16	13	13	20	19	20	25	19	21	21	17	8	21	29	23	3	6	35	22	25	23	49	36	21	43	25	49	29	18	37	23	18	28	23	26	36	20	38	29	28	52	49	29	17	34	32	14
OCPFDLNE_01612	46	58	21	18	24	46	23	42	26	43	30	55	72	53	37	66	37	25	10	72	46	46	46	124	61	60	95	65	53	38	21	65	71	39	47	50	52	67	41	63	56	58	75	58	45	48	40	57	32
OCPFDLNE_01613	128	114	66	37	56	84	82	104	114	94	97	165	181	108	88	154	132	65	27	122	78	119	111	220	230	115	163	128	121	90	86	129	132	64	100	113	115	125	115	134	130	166	148	196	136	87	125	299	71
OCPFDLNE_01614	69	61	41	25	20	55	21	46	71	52	62	54	84	95	52	111	71	68	5	71	33	62	65	115	114	46	82	88	72	65	43	84	94	32	59	60	69	80	71	51	63	84	80	72	60	53	54	82	41
OCPFDLNE_01615	65	43	19	28	21	44	35	57	50	26	31	62	83	110	36	71	70	64	3	46	21	42	36	46	84	27	57	82	73	44	37	74	61	44	47	60	76	82	58	53	61	72	78	92	79	42	50	151	59
OCPFDLNE_01616	2	4	4	0	0	4	5	2	1	5	1	6	13	5	6	2	4	4	0	3	1	3	3	2	12	2	0	6	1	4	3	4	10	2	6	6	7	8	5	8	7	4	4	11	6	1	4	9	4
OCPFDLNE_01617	15	10	16	10	10	21	10	12	14	16	10	19	25	27	12	6	13	8	2	7	6	6	5	7	15	2	3	16	4	1	4	7	14	3	4	13	9	11	10	8	10	7	4	10	6	10	6	22	6
OCPFDLNE_01618	574	545	306	213	266	591	425	575	490	482	431	871	1019	194	452	822	565	133	95	545	280	560	355	627	696	376	546	704	581	381	382	654	881	343	426	430	619	569	490	773	721	678	708	774	571	461	635	1125	481
OCPFDLNE_01619	20	18	13	13	15	34	21	46	37	41	36	76	91	30	30	56	50	11	4	71	21	34	41	72	67	35	57	20	20	17	11	33	43	16	16	21	33	32	19	37	44	32	29	34	35	15	12	51	26
OCPFDLNE_01620	18	32	20	7	6	35	26	41	26	29	29	31	71	26	31	58	45	14	7	38	24	52	40	92	50	53	86	34	28	27	24	34	59	15	23	21	44	27	39	40	45	40	29	56	38	24	25	100	24
OCPFDLNE_01621	8	10	10	3	3	20	18	30	36	20	24	54	65	21	32	53	34	10	4	35	17	29	49	63	83	33	65	17	31	19	11	27	28	8	18	24	29	19	21	23	25	30	37	22	45	16	27	53	23
OCPFDLNE_01622	36	30	24	12	20	36	45	44	62	37	60	85	86	9	59	114	72	11	25	106	63	99	105	235	171	93	187	43	64	46	38	69	65	33	43	60	61	67	52	66	81	89	86	94	67	39	67	142	41
OCPFDLNE_01623	66	64	44	31	33	63	35	66	64	53	51	71	111	26	54	109	77	15	18	85	48	73	61	142	102	46	119	74	82	50	32	96	104	35	58	50	74	91	49	63	67	57	88	90	43	35	52	84	30
OCPFDLNE_01624	108	119	87	61	61	96	79	90	102	76	102	134	186	81	107	195	146	53	25	151	89	124	103	219	160	104	164	173	190	96	79	207	212	93	147	143	156	162	151	149	188	192	239	211	110	110	156	212	108
OCPFDLNE_01625	38	68	42	30	31	70	49	49	51	50	40	77	86	31	50	97	66	18	15	85	31	51	69	88	62	57	58	92	95	42	51	95	96	47	72	67	102	78	64	79	95	90	97	123	60	49	73	108	77
OCPFDLNE_01626	262	263	194	114	139	319	144	147	143	130	138	199	180	44	109	183	119	29	17	163	65	148	109	158	170	87	169	288	283	186	144	276	327	127	152	165	192	199	128	179	193	155	201	184	141	84	174	233	99
OCPFDLNE_01627	502	468	284	213	204	496	297	365	467	297	332	493	549	77	389	794	504	45	94	413	228	328	294	416	623	334	373	575	639	329	452	501	638	265	445	555	579	488	449	697	523	561	572	554	500	370	461	807	343
OCPFDLNE_01628	8306	4759	3314	3239	3040	6535	3568	5535	5392	4861	4197	9441	6920	4717	4391	5074	4946	3210	320	4505	2591	3417	2540	3211	5742	2266	2421	7513	6637	3651	6132	4488	10335	2853	4128	6584	7175	4609	6533	9470	6363	6928	5320	6940	7967	5618	5943	21590	6754
OCPFDLNE_01629	64	90	60	32	40	111	70	113	91	81	65	107	150	26	83	124	86	18	27	85	45	82	63	145	130	81	111	113	79	61	57	109	169	39	56	75	101	86	73	152	95	120	106	97	65	68	83	168	66
OCPFDLNE_01630	98	112	79	30	45	159	97	159	93	102	104	167	174	22	81	142	116	27	32	138	75	102	89	207	186	119	167	141	155	102	90	129	233	75	103	102	129	117	114	142	170	125	142	142	132	79	105	237	96
OCPFDLNE_01631	269	209	142	152	145	274	211	348	414	220	290	462	429	31	200	414	281	40	71	257	165	221	192	336	426	221	190	242	206	114	186	228	295	101	155	200	228	183	210	198	182	178	164	262	246	137	193	627	130
OCPFDLNE_01632	4	4	1	4	1	4	4	13	4	4	6	15	17	0	3	14	3	0	0	9	5	5	4	14	8	5	14	3	6	1	4	9	7	0	3	7	9	4	7	8	6	7	9	4	6	6	9	18	7
OCPFDLNE_01633	5	2	4	2	5	2	5	5	4	2	9	5	12	6	4	9	6	2	4	10	6	8	7	7	11	8	18	3	2	3	4	3	8	3	4	3	0	8	3	3	9	1	2	3	3	1	6	11	3
OCPFDLNE_01634	58	39	19	27	24	60	36	64	63	46	44	79	118	54	53	83	57	20	3	64	42	48	44	67	84	26	52	45	35	27	28	32	66	23	21	35	31	41	27	56	38	44	39	63	49	28	43	89	25
OCPFDLNE_01635	4	2	0	2	0	0	2	3	1	1	0	1	4	1	0	1	1	3	0	1	0	6	0	8	0	2	2	2	1	1	0	2	2	1	2	1	4	0	2	1	1	2	1	0	0	1	1	3	0
OCPFDLNE_01636	1	1	0	0	0	1	1	1	2	1	2	0	2	0	0	2	1	0	1	2	1	0	1	6	1	0	0	1	3	0	1	4	0	2	0	0	1	0	1	0	1	1	0	3	2	0	4	3	1
OCPFDLNE_01637	0	0	0	1	0	0	0	0	0	0	0	0	3	0	0	2	1	0	0	1	0	1	0	2	2	0	3	1	1	0	0	0	2	0	0	0	0	0	1	1	1	0	0	1	0	0	0	2	1
OCPFDLNE_01638	1	0	0	0	1	0	0	0	1	3	0	0	3	0	0	2	0	0	1	3	0	1	0	1	1	0	2	1	1	0	0	1	0	1	0	0	0	2	0	2	1	0	1	1	0	0	0	0	0
OCPFDLNE_01639	0	0	0	0	1	1	0	0	0	0	0	0	7	0	0	1	0	0	0	0	0	0	2	0	0	0	0	0	0	1	0	1	0	1	1	1	0	0	0	0	0	0	0	0	1	0	0	1	0
OCPFDLNE_01640	16	21	7	4	9	16	8	15	11	14	13	22	24	16	19	44	26	6	10	27	14	25	23	36	36	24	39	19	17	5	6	17	29	10	5	10	19	19	16	15	16	24	7	19	15	8	12	23	10
OCPFDLNE_01641	5	8	9	7	3	7	5	10	7	14	15	13	25	3	15	23	18	5	5	19	13	16	21	41	21	16	37	12	13	6	5	10	9	8	12	16	12	20	14	8	7	22	24	13	10	18	18	17	6
OCPFDLNE_01642	47	30	20	18	31	54	50	75	97	89	64	134	193	76	97	169	109	56	17	88	49	73	78	144	127	81	100	50	65	41	38	65	85	27	44	48	56	50	46	74	73	86	77	95	95	64	70	226	64
OCPFDLNE_01643	8	1	4	4	7	6	8	4	15	8	5	22	16	4	7	10	9	2	1	18	8	7	8	13	11	5	12	6	5	4	3	4	7	2	1	1	1	6	9	9	9	14	9	11	9	5	11	12	6
OCPFDLNE_01644	78	99	77	42	69	134	121	205	184	126	187	298	403	97	181	435	320	74	45	242	144	213	164	312	336	192	322	152	110	102	86	124	190	70	100	83	120	127	114	177	178	140	138	206	159	122	159	331	147
OCPFDLNE_01645	11	9	9	4	4	18	7	8	10	11	7	11	8	1	8	3	10	3	0	10	4	3	5	5	9	4	9	15	12	8	8	15	30	3	11	8	12	7	11	10	10	9	12	12	8	5	6	17	7
OCPFDLNE_01646	280	149	132	80	114	248	142	289	335	234	250	393	418	325	319	542	369	198	118	501	322	386	542	1222	801	561	742	327	279	170	209	296	402	131	178	265	292	221	241	289	319	330	302	306	287	137	230	640	167
OCPFDLNE_01647	10	11	5	0	5	12	11	30	26	20	17	46	49	23	23	31	29	19	3	38	21	26	31	70	55	24	48	12	13	5	10	11	23	5	11	10	12	8	12	14	22	20	9	27	26	12	11	51	16
OCPFDLNE_01648	2172	1510	1068	720	710	1603	893	1133	1117	931	708	1816	1394	534	688	546	558	391	83	959	707	800	579	969	1288	634	744	1520	1411	943	1432	1258	2385	596	791	1094	1067	879	1163	1195	1164	1179	965	1308	1354	738	715	2975	825
OCPFDLNE_01649	1960	1618	1126	711	788	1769	877	1215	1250	990	749	2183	1599	1053	859	786	728	592	82	1178	568	979	708	1184	1583	675	772	2150	2077	935	1415	1508	2843	671	952	1642	1493	1047	1378	1585	1561	1599	1335	1647	1635	867	1019	3922	991
OCPFDLNE_01650	3	3	0	2	2	3	9	8	5	3	10	17	20	2	10	21	12	4	1	8	3	8	13	10	11	6	10	15	6	3	3	5	9	1	0	2	9	6	3	6	7	4	4	8	4	10	5	9	8
OCPFDLNE_01651	19	10	8	12	8	17	32	51	63	35	39	83	100	7	42	70	45	9	5	22	12	22	18	41	58	20	21	22	16	10	12	18	27	10	14	16	21	17	16	32	31	24	26	31	42	22	25	96	18
OCPFDLNE_01652	208	192	128	67	83	264	108	196	161	144	143	308	345	93	149	243	197	81	15	223	122	233	152	264	266	148	224	257	207	165	146	208	326	115	154	209	263	210	180	223	284	270	261	302	275	142	198	556	165
OCPFDLNE_01653	293	253	188	126	128	260	244	233	206	234	144	356	488	105	333	405	328	93	38	336	176	274	280	390	344	230	341	445	480	303	255	453	385	334	464	478	528	543	372	792	851	874	944	805	681	558	799	977	581
OCPFDLNE_01654	55	59	24	22	32	52	49	72	80	64	80	98	117	12	37	97	56	2	10	75	29	70	53	97	122	60	80	53	37	29	45	56	65	15	36	59	56	46	46	48	46	46	60	52	56	39	41	107	31
OCPFDLNE_01655	78	65	37	32	37	77	50	71	88	65	83	122	109	18	53	107	70	7	24	102	63	88	94	135	174	87	112	106	80	53	65	69	102	26	65	85	68	54	80	85	63	84	78	98	67	34	51	143	55
OCPFDLNE_01656	11	5	5	4	5	10	13	13	17	13	15	22	23	6	12	17	11	6	7	26	7	10	6	18	31	15	18	13	16	10	7	15	14	7	9	9	14	13	15	14	14	13	13	17	16	13	19	14	11
OCPFDLNE_01657	66	62	44	33	33	47	48	67	54	46	40	56	129	5	49	150	96	6	13	112	45	69	79	95	102	50	91	76	70	48	24	74	105	53	62	62	93	68	67	66	79	89	107	89	59	53	87	129	71
OCPFDLNE_01658	74	95	62	50	53	105	110	136	172	106	130	243	282	153	150	210	176	128	38	159	116	119	100	190	250	149	140	89	80	52	80	75	177	41	59	76	133	74	115	116	89	96	76	121	132	81	87	351	79
OCPFDLNE_01659	1	0	1	1	1	2	0	5	8	1	0	5	4	2	10	1	2	0	3	5	4	2	1	2	0	5	2	0	0	0	4	0	0	2	0	7	0	1	3	0	2	2	1	1	1	0	2	6	1
OCPFDLNE_01660	8	1	3	1	1	3	3	1	4	2	6	5	10	0	10	6	5	0	1	3	1	2	1	6	10	7	4	4	4	0	3	2	3	3	3	11	4	5	4	4	3	8	4	6	3	3	3	15	2
OCPFDLNE_01661	14	4	6	4	4	13	12	19	23	10	14	24	31	0	8	40	19	1	7	19	13	16	11	31	37	16	19	13	8	4	12	15	22	6	9	18	16	6	12	11	15	20	8	13	11	4	7	39	14
OCPFDLNE_01662	11	15	20	7	3	15	13	21	24	20	26	33	33	4	28	46	21	3	7	32	37	24	33	55	28	32	56	20	28	21	21	11	25	13	14	17	26	14	17	23	16	30	39	40	35	12	22	56	25
OCPFDLNE_01663	3	6	4	1	6	3	15	20	15	18	14	21	46	5	12	28	22	0	5	17	11	5	35	35	13	21	33	6	7	7	7	10	16	3	12	15	9	8	12	8	8	14	11	12	10	11	15	27	3
OCPFDLNE_01664	2	1	2	1	2	2	4	9	5	9	4	15	13	0	11	20	13	1	0	3	5	3	6	9	8	6	12	7	1	3	4	4	11	3	3	4	12	9	3	1	8	8	6	7	11	4	6	12	3
OCPFDLNE_01665	25	21	5	12	6	16	26	33	29	23	31	49	45	6	32	66	29	3	8	68	54	35	98	133	78	61	111	32	20	12	18	15	28	7	12	24	21	24	27	21	23	21	21	32	18	15	12	76	24
OCPFDLNE_01666	122	128	99	48	69	122	82	163	120	105	116	209	188	37	97	227	162	31	28	163	95	132	129	246	204	111	175	145	132	93	88	135	221	78	106	107	118	101	121	144	134	139	145	178	121	98	132	270	108
OCPFDLNE_01667	5	4	2	1	2	0	1	4	2	3	2	2	10	2	3	5	6	2	0	3	2	3	5	3	2	2	2	4	0	6	2	5	4	0	2	4	3	3	1	3	2	5	2	6	4	1	1	4	1
OCPFDLNE_01668	14	24	10	8	14	28	9	15	17	13	12	15	29	1	19	31	15	1	4	17	9	27	14	27	24	12	27	13	18	5	10	26	27	10	15	16	21	22	20	26	15	22	16	32	15	13	18	35	10
OCPFDLNE_01669	7	3	8	3	5	10	7	17	6	5	6	20	9	5	7	23	17	2	3	15	7	8	9	26	20	13	15	3	10	3	2	8	13	6	9	9	6	15	11	8	5	14	14	5	5	5	11	19	9
OCPFDLNE_01670	17	17	11	4	13	17	10	20	13	11	15	26	35	10	10	33	24	3	4	30	8	24	22	48	31	22	43	28	24	5	6	12	31	14	16	11	16	16	16	13	22	26	20	34	19	2	21	41	15
OCPFDLNE_01671	8	2	0	2	5	7	10	8	13	3	10	23	23	3	9	28	14	2	2	14	4	9	12	21	40	13	30	11	11	5	7	9	17	4	10	11	7	14	10	10	3	8	13	16	9	7	8	21	5
OCPFDLNE_01672	1	1	2	2	1	3	4	8	5	4	12	11	9	3	2	10	4	2	3	6	2	6	4	10	4	6	8	2	2	0	0	3	1	0	3	2	4	3	3	6	6	6	6	11	5	1	6	15	6
OCPFDLNE_01673	0	3	1	1	0	2	1	0	0	2	0	0	8	1	0	3	1	2	0	2	2	1	2	2	1	3	3	3	2	0	1	1	0	2	0	1	0	0	2	1	0	0	3	1	0	2	4	2	1
OCPFDLNE_01674	0	1	2	0	0	0	0	2	3	0	1	3	10	0	1	1	1	0	1	4	2	1	10	7	5	5	4	3	1	1	0	2	3	1	2	1	0	2	0	6	3	3	4	3	2	4	1	5	2
OCPFDLNE_01675	1	1	0	0	0	0	0	2	1	0	0	0	1	1	2	0	1	0	0	1	1	3	3	2	1	1	1	0	0	0	1	1	6	0	1	1	0	2	0	2	0	3	1	3	1	0	1	2	1
OCPFDLNE_01676	1	0	0	0	1	3	0	0	1	0	0	0	1	0	1	4	0	0	0	1	2	1	0	6	2	0	2	1	1	1	0	5	0	0	1	1	2	0	3	0	4	1	3	0	2	0	1	2	2
OCPFDLNE_01677	0	0	0	0	0	0	0	1	1	1	0	0	8	0	0	1	0	0	1	1	2	0	2	1	0	4	1	0	1	1	0	0	1	1	0	0	2	0	0	0	2	1	1	0	1	2	2	0	0
OCPFDLNE_01678	0	0	0	0	1	0	0	0	0	1	0	0	2	0	0	1	1	0	0	1	0	1	0	2	1	0	2	0	0	0	1	0	7	0	0	0	0	1	0	0	0	0	1	0	0	3	1	1	0
OCPFDLNE_01679	1	0	0	0	0	1	1	1	1	2	0	1	8	0	1	0	3	0	0	0	1	2	6	2	2	2	1	2	0	0	0	2	0	0	1	2	0	1	0	4	0	1	0	2	3	0	0	0	1
OCPFDLNE_01680	10814	13856	9062	5302	5813	18666	7741	9145	5637	6700	5205	10912	8921	2505	3905	8795	5076	1818	1179	6880	3314	8309	5506	10245	8891	5479	8493	17676	16459	9313	7844	16780	23394	6929	8387	8442	10804	9962	7447	9864	8929	7948	9443	8413	5263	4921	6192	8749	4991
OCPFDLNE_01681	17	11	8	9	10	15	13	14	8	17	7	15	19	3	13	11	9	3	0	11	6	14	6	11	5	11	18	35	41	35	17	29	27	15	24	35	30	21	38	33	24	34	31	32	29	19	30	69	24
OCPFDLNE_01682	109	113	89	57	81	250	217	332	328	284	279	544	538	336	229	406	382	142	21	139	59	101	175	204	170	117	178	286	220	163	124	276	475	118	144	234	214	248	185	236	352	425	241	412	460	201	278	660	160
OCPFDLNE_01683	99	156	116	71	90	213	194	363	379	310	393	658	564	621	255	586	389	328	44	227	104	187	197	288	315	175	343	256	251	177	127	264	286	111	151	201	215	214	192	108	193	233	178	231	234	108	263	349	93
OCPFDLNE_01684	49	38	32	22	18	50	44	76	85	56	69	100	181	10	109	142	103	5	41	149	128	102	119	276	210	161	171	64	64	44	42	77	64	40	43	65	66	59	55	77	64	59	88	89	77	61	73	142	43
OCPFDLNE_01685	16	16	8	9	15	7	17	26	20	13	25	39	74	7	29	58	40	2	4	39	22	29	32	64	75	19	53	15	21	10	13	25	25	9	20	26	27	23	24	43	28	40	29	36	25	21	42	71	21
OCPFDLNE_01686	8	17	6	5	12	12	13	21	11	14	6	28	43	0	16	13	23	0	2	20	11	6	9	15	29	6	8	20	22	8	16	10	13	7	8	18	18	19	31	29	26	20	28	32	33	25	32	72	22
OCPFDLNE_01687	77	115	71	47	56	138	90	129	116	113	104	200	188	77	94	172	122	80	13	133	68	121	88	246	193	104	217	145	123	67	77	116	215	76	76	100	112	100	119	93	116	129	114	143	113	83	136	185	52
OCPFDLNE_01688	20	29	10	9	18	40	20	23	21	19	26	45	54	0	25	44	33	0	14	44	26	24	32	64	36	33	61	30	23	15	11	25	34	14	20	24	23	21	21	28	22	31	42	29	23	16	26	57	19
OCPFDLNE_01689	16	16	13	8	10	23	11	13	23	22	11	27	28	0	26	35	16	0	4	37	22	15	23	51	42	28	56	22	30	6	14	26	31	7	15	28	25	21	16	20	24	31	20	32	25	21	24	41	13
OCPFDLNE_01690	79	71	62	35	41	53	62	68	65	65	92	104	149	13	77	192	125	11	44	206	92	165	152	305	223	159	214	88	128	78	61	128	131	67	65	81	108	114	81	103	103	135	161	165	114	65	112	176	98
OCPFDLNE_01691	50	48	34	20	33	43	24	27	36	46	41	45	67	1	53	82	49	0	21	66	41	51	66	101	64	58	89	54	96	83	45	74	35	41	64	54	63	76	56	56	89	88	106	68	53	53	78	83	52
OCPFDLNE_01692	6	3	1	3	0	1	7	3	7	6	4	10	19	2	3	21	10	0	2	6	6	9	11	13	7	5	9	1	6	3	3	2	6	2	1	6	8	6	5	9	7	6	12	11	10	5	8	12	1
OCPFDLNE_01693	4	3	3	1	2	6	7	8	11	4	8	8	11	3	5	8	5	3	0	10	5	6	6	10	16	6	11	6	3	3	2	1	2	1	5	3	5	2	4	4	6	3	2	4	7	1	7	5	7
OCPFDLNE_01694	1	1	0	0	0	0	0	0	0	0	0	0	4	0	0	1	1	0	0	0	2	2	0	1	2	1	1	0	2	0	1	0	0	0	0	0	0	0	1	0	0	0	1	1	0	0	1	0	0
OCPFDLNE_01695	47	31	21	22	17	44	28	55	59	38	52	82	110	24	57	74	52	21	24	72	50	73	72	224	125	84	210	67	41	32	38	55	71	31	30	40	58	41	45	44	70	62	64	64	61	22	39	112	46
OCPFDLNE_01696	14	5	4	8	6	12	7	7	22	13	16	14	13	7	14	21	10	5	11	24	21	25	23	80	40	34	47	7	14	8	6	8	14	9	11	8	11	9	9	18	15	11	4	17	13	7	13	24	9
OCPFDLNE_01697	8	6	7	2	4	9	6	8	2	3	8	9	16	6	4	10	2	0	19	20	26	17	45	111	28	49	70	10	8	8	4	8	8	3	4	0	2	11	6	5	5	6	4	7	5	4	6	11	1
OCPFDLNE_01698	6	6	5	1	4	4	4	5	14	5	8	4	22	10	7	14	7	2	19	37	18	20	68	142	42	66	116	9	5	4	3	8	11	4	2	4	9	8	6	9	13	6	8	8	4	4	3	13	3
OCPFDLNE_01699	1	1	0	0	0	0	0	1	3	1	3	3	3	0	1	2	0	0	0	1	0	0	1	0	0	1	1	0	2	0	1	1	0	0	1	0	1	2	1	3	1	2	3	0	0	1	1	3	0
OCPFDLNE_01700	0	0	0	1	0	2	1	2	0	0	0	1	2	3	2	2	1	2	0	1	0	0	2	1	6	1	0	0	2	1	0	1	0	0	0	2	2	1	0	3	1	1	1	0	3	1	0	5	1
OCPFDLNE_01701	0	0	0	0	1	0	0	1	0	3	0	1	2	0	0	0	0	1	0	4	0	1	2	0	2	0	1	0	0	0	0	0	0	0	0	0	1	0	0	1	0	0	0	1	1	0	1	1	0
OCPFDLNE_01702	0	0	0	0	1	0	0	0	2	3	0	0	1	0	0	0	1	0	0	0	1	1	1	4	3	0	1	1	1	0	0	0	3	0	0	0	0	0	1	0	0	0	0	1	4	0	0	2	0
OCPFDLNE_01703	84	84	58	32	34	99	111	185	149	139	152	204	363	128	154	301	239	85	45	255	127	182	191	369	374	213	376	105	71	57	52	102	167	42	71	80	111	84	80	108	134	155	111	139	129	81	87	327	70
OCPFDLNE_01704	121	112	70	30	45	140	139	236	267	201	211	361	480	230	272	388	314	136	89	321	215	254	283	590	399	326	527	152	108	87	94	129	249	87	93	122	185	145	129	203	208	228	184	233	211	118	170	416	133
OCPFDLNE_01705	0	0	0	0	0	0	0	0	0	0	0	0	6	0	0	0	0	0	0	0	0	0	2	0	0	0	0	0	0	0	0	0	0	0	0	0	0	0	1	1	0	0	0	0	0	0	0	1	0
OCPFDLNE_01706	0	0	0	0	0	0	0	0	0	0	1	0	1	0	0	0	0	0	0	0	0	0	0	0	1	0	0	0	0	0	1	0	3	0	1	1	0	0	0	0	1	0	0	0	0	0	1	2	0
OCPFDLNE_01707	30	28	19	8	19	25	31	51	37	53	55	68	102	57	47	84	72	26	9	83	69	60	90	211	75	59	147	34	35	28	31	43	42	22	30	28	40	52	30	53	47	41	51	64	49	32	47	112	45
OCPFDLNE_01708	2	4	1	1	4	5	3	8	6	4	3	6	11	3	5	11	9	0	5	8	0	10	5	11	7	11	19	2	2	5	2	7	10	2	1	1	7	6	9	7	4	5	4	5	7	3	3	9	3
OCPFDLNE_01709	6	5	0	2	0	6	5	8	2	6	2	3	13	0	7	5	9	0	2	10	8	12	9	9	14	8	8	10	4	1	1	3	7	1	4	3	3	1	0	8	3	1	5	3	7	0	1	6	2
OCPFDLNE_01710	18	23	13	10	4	18	12	58	33	23	33	64	63	19	39	63	38	16	6	49	21	33	46	51	67	31	43	21	24	6	10	13	33	12	19	14	15	14	22	24	28	30	22	41	29	15	24	79	25
OCPFDLNE_01711	5	10	3	3	5	8	7	14	18	11	8	18	38	2	9	24	23	1	2	17	9	7	9	22	16	20	24	3	6	7	6	4	17	11	1	7	8	9	6	5	8	7	13	12	15	8	13	30	6
OCPFDLNE_01712	3	7	3	2	1	5	9	20	25	14	20	25	23	10	15	13	7	5	1	9	14	8	22	23	12	12	15	6	5	2	4	4	5	5	5	5	5	3	5	8	4	4	3	5	9	4	6	20	9
OCPFDLNE_01713	149	124	87	58	77	120	92	147	109	121	118	191	246	142	149	286	204	120	40	198	107	142	148	281	202	142	257	252	227	154	114	210	211	119	177	185	190	199	143	252	248	297	340	355	207	167	308	409	213
OCPFDLNE_01714	9	10	5	5	6	11	12	12	9	5	11	24	46	6	19	21	23	4	2	16	6	12	7	16	16	9	5	15	12	8	19	23	17	4	11	19	16	25	19	37	17	20	19	21	22	11	27	54	15
OCPFDLNE_01715	12	9	6	4	8	8	13	9	11	12	7	21	26	12	29	15	17	10	3	14	5	5	6	13	7	4	5	7	5	4	7	14	13	8	7	18	14	10	12	20	11	14	14	18	16	11	11	40	13
OCPFDLNE_01716	2	4	2	3	0	1	3	6	6	4	6	8	17	3	9	4	5	1	7	11	4	6	9	4	4	6	4	7	3	0	5	5	3	2	3	6	4	8	3	12	3	5	8	7	7	5	9	11	7
OCPFDLNE_01717	9	4	7	9	11	11	17	32	31	27	15	32	43	26	25	30	17	17	4	29	20	11	13	24	20	14	3	8	6	3	13	4	14	0	5	5	21	7	4	11	10	9	9	14	11	7	16	34	6
OCPFDLNE_01718	3	18	3	2	3	11	5	11	9	14	13	34	12	8	5	10	6	3	4	14	14	17	21	21	15	21	21	10	7	10	11	10	7	2	6	8	6	7	6	10	4	9	12	1	14	10	6	15	3
OCPFDLNE_01719	26	33	20	13	15	31	25	30	39	27	38	41	68	9	44	91	66	8	21	43	47	47	59	106	64	46	88	51	37	22	15	49	44	32	36	34	40	36	36	33	46	41	46	58	28	20	49	52	32
OCPFDLNE_01720	51	75	49	40	54	93	54	93	104	63	75	127	144	78	83	139	80	66	26	87	51	72	55	131	111	81	124	60	89	47	44	65	132	49	51	70	84	80	75	72	65	56	67	85	63	44	37	113	41
OCPFDLNE_01721	24	55	24	16	21	35	35	29	46	43	45	56	96	60	45	141	97	44	18	89	45	39	75	67	103	35	82	55	67	57	34	82	80	38	49	55	81	75	59	52	63	88	89	98	53	40	52	99	61
OCPFDLNE_01722	86	98	57	28	57	100	83	97	109	74	128	164	248	140	155	334	204	107	21	203	129	155	156	218	211	138	211	152	126	77	71	168	168	96	104	100	176	175	121	112	166	164	165	201	120	113	144	238	91
OCPFDLNE_01723	63	79	51	45	51	68	96	102	122	96	133	165	294	116	133	346	224	102	35	202	97	144	188	244	232	131	167	126	107	84	74	131	140	98	109	140	140	145	124	147	135	200	189	206	151	106	170	251	120
OCPFDLNE_01724	15	10	12	7	9	17	24	26	31	23	32	43	51	8	29	50	39	2	4	39	29	31	27	35	59	26	34	20	13	8	16	16	26	17	9	16	20	24	21	34	26	26	24	28	37	14	19	63	24
OCPFDLNE_01725	6	6	4	0	6	3	0	3	5	5	10	9	14	5	7	6	8	2	4	11	7	7	9	11	9	6	8	7	3	2	8	6	6	4	3	2	9	11	5	10	12	6	9	4	11	7	5	11	9
OCPFDLNE_01726	6	1	1	0	0	1	4	5	2	1	3	5	8	2	3	7	1	0	0	2	1	4	5	6	0	3	8	6	4	2	3	3	4	4	1	4	3	3	3	2	3	4	3	4	1	3	10	12	0
OCPFDLNE_01727	0	0	2	3	0	3	1	1	3	1	8	2	10	0	3	4	1	1	0	4	1	2	3	2	2	2	6	2	1	1	1	2	1	0	1	0	3	2	1	1	1	1	1	1	1	2	1	4	2
OCPFDLNE_01728	2	4	3	1	0	2	2	4	6	3	2	2	11	0	2	8	2	0	0	5	4	2	8	6	5	1	1	3	8	4	1	2	0	3	2	0	3	3	5	3	3	3	6	10	3	2	5	5	2
OCPFDLNE_01729	1	0	0	3	1	3	7	3	3	4	2	0	14	0	3	1	4	0	0	3	5	6	4	2	3	2	5	2	0	2	1	0	2	4	1	1	2	1	0	1	2	1	5	2	4	2	0	11	2
OCPFDLNE_01754	89	76	50	17	38	96	52	114	71	79	74	147	196	56	94	124	101	20	17	82	70	78	71	114	109	64	87	87	89	38	57	86	75	66	51	66	97	79	58	102	93	87	100	84	66	50	88	159	64
OCPFDLNE_01755	317	280	179	111	143	266	192	258	306	295	197	388	553	64	372	406	284	49	67	320	214	258	288	464	412	292	374	423	421	248	273	412	484	259	304	404	470	426	310	465	472	555	528	484	392	258	453	710	271
OCPFDLNE_01756	7	10	4	1	2	4	11	6	8	9	11	8	20	1	13	9	13	6	1	24	4	8	7	10	22	10	13	10	9	6	5	9	8	6	8	3	4	4	11	10	6	10	9	12	12	5	7	17	5
OCPFDLNE_01757	29	28	19	8	10	35	29	45	54	31	30	62	87	53	45	71	33	43	10	62	42	41	39	59	72	36	53	17	20	20	26	31	40	12	17	30	39	23	29	29	33	26	37	35	43	19	20	88	14
OCPFDLNE_01758	450	507	288	206	179	573	386	564	605	510	442	857	756	205	374	640	473	279	81	410	289	342	220	431	621	273	342	385	250	207	331	309	698	196	245	343	443	294	338	361	278	285	262	350	352	269	278	1001	256
OCPFDLNE_01759	2	9	1	3	8	11	6	14	13	10	14	17	23	5	17	11	21	5	2	17	9	14	8	22	14	14	13	12	13	7	4	7	11	6	8	4	11	5	10	9	19	11	18	18	12	5	9	21	7
OCPFDLNE_01760	1	4	1	2	1	1	3	5	6	3	8	6	16	4	6	14	10	1	1	5	2	10	4	9	4	8	5	3	6	4	3	4	6	1	4	4	6	4	4	1	10	2	14	4	5	7	4	9	3
OCPFDLNE_01761	1361	1272	728	564	576	1220	892	1402	1189	1001	839	2001	2453	872	1184	1710	1545	609	215	1301	719	1161	953	1899	1652	1166	1603	1902	1848	1045	1246	1668	2832	875	1118	1716	1665	1589	1484	1954	1873	2224	1848	2198	1877	1304	1674	4191	1331
OCPFDLNE_01762	8	12	10	6	11	14	9	9	18	10	17	23	25	5	13	21	15	3	1	9	4	14	6	8	11	5	17	12	14	12	8	26	19	12	19	17	18	16	16	15	25	28	18	31	17	16	24	30	16
OCPFDLNE_01763	10	4	7	4	4	7	10	6	6	4	13	15	14	12	11	18	11	7	1	4	3	6	3	11	4	4	5	10	3	15	4	12	7	10	7	11	9	11	7	7	17	15	15	17	13	5	12	8	7
OCPFDLNE_01764	24	32	21	12	10	21	16	18	18	15	12	28	40	11	22	39	30	3	3	19	9	18	20	28	23	16	18	35	32	23	8	39	53	19	19	18	47	44	17	41	46	40	52	51	39	26	39	83	23
OCPFDLNE_01765	332	271	194	143	149	344	275	402	299	318	281	535	478	181	212	221	245	124	20	271	128	252	159	268	305	165	213	370	377	237	277	329	481	180	227	321	301	324	218	416	358	385	386	346	357	203	333	450	245
OCPFDLNE_01766	81	76	58	31	36	65	52	78	91	64	72	128	167	116	87	143	98	92	22	73	42	81	101	147	142	93	124	96	109	54	68	105	106	51	72	84	93	97	105	102	114	115	136	131	73	71	88	178	72
OCPFDLNE_01767	2	4	5	1	0	6	7	5	10	13	4	14	26	15	10	14	7	8	1	12	6	11	8	8	20	4	11	4	7	6	5	5	8	2	5	8	4	10	7	12	16	10	16	10	15	5	11	21	8
OCPFDLNE_01768	1	1	1	0	1	1	3	3	0	1	3	3	10	0	6	5	5	2	2	3	1	3	6	6	6	3	5	1	2	1	0	2	0	1	2	2	7	3	1	1	1	5	2	0	3	1	2	0	1
OCPFDLNE_01769	3	2	1	2	0	4	1	1	5	1	2	6	7	0	2	0	3	3	2	10	9	1	0	3	4	6	2	2	1	0	4	0	4	3	0	6	2	2	0	5	3	2	3	4	0	0	8	12	1
OCPFDLNE_01770	2	3	0	0	0	0	0	2	0	1	1	2	2	1	0	1	0	0	0	2	1	0	0	0	3	2	0	0	0	0	1	0	1	0	0	0	1	0	2	0	2	1	0	3	0	2	2	1	1
OCPFDLNE_01771	0	0	0	0	0	0	0	0	0	0	0	0	0	0	0	0	0	0	0	0	0	0	0	0	1	0	0	0	0	0	0	0	0	0	0	0	0	0	0	0	0	0	0	0	0	0	0	0	0
OCPFDLNE_01772	15	17	7	3	4	14	14	16	7	5	14	16	23	20	10	27	18	10	4	23	14	20	12	14	21	17	19	7	6	14	16	13	21	11	16	11	15	2	14	11	16	16	7	14	7	17	11	31	6
OCPFDLNE_01773	18	10	10	3	8	16	15	31	24	8	10	24	30	11	29	27	22	6	4	17	9	15	9	25	20	8	20	10	15	13	11	15	27	6	9	8	18	12	10	10	19	7	20	17	9	5	11	26	9
OCPFDLNE_01774	62	66	49	35	33	58	58	59	69	61	58	104	143	57	96	135	105	49	22	95	51	72	80	120	112	64	108	94	101	61	57	105	119	82	80	68	84	110	67	105	135	129	135	125	65	98	109	137	78
OCPFDLNE_01775	20	21	12	9	11	10	19	23	15	16	11	33	30	11	23	36	31	12	2	23	10	18	13	18	22	15	24	32	33	19	10	26	44	17	15	18	36	23	25	40	28	36	41	40	29	22	32	52	26
OCPFDLNE_01776	14	10	5	8	7	23	15	17	32	18	16	36	33	4	18	31	24	4	3	23	12	14	26	38	29	8	24	13	6	5	15	9	20	6	8	11	14	10	12	17	13	16	11	9	12	13	8	45	9
OCPFDLNE_01777	62	39	27	24	17	35	13	44	31	32	30	51	83	20	24	55	43	6	4	50	19	28	33	50	50	24	38	50	54	27	27	48	71	17	39	48	54	26	34	62	54	45	57	44	37	38	58	117	52
OCPFDLNE_01778	1	1	1	1	0	0	1	1	0	0	0	4	2	0	0	1	0	0	0	2	0	0	1	3	0	0	1	2	1	1	0	1	7	0	0	1	2	1	0	2	0	1	0	1	1	2	0	3	0
OCPFDLNE_01779	22	24	17	12	6	23	14	21	12	24	15	47	49	16	20	31	25	7	2	30	11	14	27	33	26	17	37	24	28	15	17	15	37	17	16	20	30	27	38	35	36	30	44	39	30	23	40	48	23
OCPFDLNE_01780	29	22	10	15	15	30	30	37	34	32	35	45	74	18	34	49	44	11	17	67	29	59	53	94	77	48	81	36	29	25	12	37	63	20	24	18	42	33	22	44	32	42	37	35	58	16	39	66	26
OCPFDLNE_01781	3	3	2	5	1	9	5	11	20	11	4	19	16	2	12	8	9	3	0	11	7	9	7	12	10	7	13	3	1	0	1	0	7	2	0	3	7	3	2	4	2	5	2	0	8	2	3	4	6
OCPFDLNE_01782	22	20	8	9	10	20	17	24	24	25	25	36	42	16	23	43	29	14	7	44	22	44	34	71	56	28	49	21	23	13	19	18	48	14	12	15	15	29	30	22	17	23	19	30	26	22	24	57	19
OCPFDLNE_01783	3	1	1	1	0	3	0	2	4	2	1	4	7	1	4	7	2	2	0	6	2	11	3	2	9	6	16	4	8	1	3	3	5	1	1	3	4	1	5	2	6	5	3	1	3	1	5	7	3
OCPFDLNE_01784	24	32	17	16	13	27	25	32	28	42	25	52	80	20	26	62	57	13	7	46	35	43	53	114	62	50	99	30	24	33	24	39	31	33	31	24	32	42	24	33	41	51	49	56	38	30	36	64	35
OCPFDLNE_01786	0	0	0	0	0	1	0	1	2	0	3	3	3	0	0	2	0	1	0	2	0	1	0	1	3	0	4	0	0	0	0	0	0	0	0	0	0	0	0	0	0	0	0	0	0	0	0	0	0
OCPFDLNE_01787	0	0	0	0	0	0	0	0	0	0	0	0	2	0	0	0	0	0	0	0	0	0	0	0	0	0	1	0	0	0	0	0	0	0	0	0	0	0	0	0	0	0	1	0	0	0	0	0	0
OCPFDLNE_01788	1	0	1	0	0	1	0	3	2	0	0	3	2	1	1	9	3	0	0	3	2	2	1	2	1	1	1	1	0	0	1	1	1	2	2	0	2	0	2	0	2	3	2	4	4	2	0	1	1
OCPFDLNE_01789	5	10	5	6	4	10	8	17	11	12	12	22	55	0	25	31	22	0	1	8	5	8	7	6	13	9	13	12	14	7	7	19	20	10	13	15	15	15	23	23	24	17	24	25	17	13	17	56	7
OCPFDLNE_01790	375	599	380	171	228	641	554	752	494	548	416	1039	2018	69	946	995	1169	45	118	767	373	748	474	918	931	570	960	856	720	485	553	850	1308	495	606	851	1054	1024	1001	956	1164	1091	1051	1265	950	782	798	1805	789
OCPFDLNE_01791	111	186	159	115	121	255	228	298	256	289	164	364	728	18	410	296	363	12	66	231	164	195	149	249	202	170	220	242	299	178	225	281	321	188	233	337	329	321	328	408	365	393	379	394	349	257	335	675	264
OCPFDLNE_01792	303	230	217	143	166	271	245	375	322	328	210	449	867	40	512	341	504	20	57	313	216	337	285	461	470	271	397	509	499	304	407	524	661	278	396	647	550	589	559	672	705	716	678	914	719	496	525	1443	473
OCPFDLNE_01793	210	181	97	71	80	190	149	217	242	192	168	311	427	169	243	407	276	109	35	281	151	222	208	345	393	213	316	240	211	127	142	243	237	136	169	241	284	240	226	299	300	341	345	340	275	149	277	521	147
OCPFDLNE_01794	71	90	76	38	43	152	105	154	136	133	154	200	263	126	181	274	226	80	31	160	111	114	172	275	190	151	234	176	137	115	116	177	194	87	106	131	158	164	126	161	186	220	186	259	179	117	208	370	122
OCPFDLNE_01795	1	0	0	2	0	2	0	1	2	3	0	3	7	1	3	6	2	5	2	4	2	4	5	4	4	2	6	1	0	3	1	0	1	1	2	1	0	0	0	5	3	8	3	2	0	2	0	2	4
OCPFDLNE_01796	0	0	1	0	0	0	1	1	2	3	0	6	4	0	1	1	4	0	0	1	2	2	0	7	0	0	2	3	1	1	1	5	1	1	3	0	1	2	1	2	3	10	0	0	1	0	2	7	3
OCPFDLNE_01797	1	0	2	0	0	3	2	2	2	2	1	7	3	12	1	5	1	2	1	4	1	1	3	5	7	4	3	1	2	0	1	0	7	0	0	0	1	1	0	5	4	3	3	5	3	0	7	13	3
OCPFDLNE_01798	93	106	59	46	47	100	92	152	112	85	79	165	231	210	102	206	136	117	13	127	57	100	75	136	199	58	113	137	115	56	64	119	175	61	93	131	173	111	150	183	166	187	200	194	149	106	142	350	85
OCPFDLNE_01799	6	9	5	6	3	9	10	12	9	10	5	11	20	9	11	11	6	8	2	13	6	10	8	19	10	7	21	7	9	5	3	7	20	3	4	4	6	12	8	18	7	18	18	15	8	10	6	13	5
OCPFDLNE_01800	15	23	12	8	3	11	4	20	7	8	7	13	30	4	12	14	13	5	3	9	13	18	12	35	15	8	20	24	29	16	8	20	25	9	23	14	13	20	14	11	16	19	18	21	12	17	18	20	13
OCPFDLNE_01801	2	11	11	5	3	3	6	3	8	9	11	18	13	2	5	9	8	1	1	11	14	14	10	17	14	6	8	11	15	7	4	20	16	8	9	7	10	11	7	9	14	14	16	9	8	9	7	13	13
OCPFDLNE_01802	14	16	16	8	9	11	21	20	17	14	25	27	40	15	17	44	24	6	2	44	10	26	16	27	24	15	23	33	17	17	10	27	30	15	18	17	17	35	23	19	43	39	43	37	22	23	36	41	25
OCPFDLNE_01803	12	7	7	7	3	7	4	6	12	5	6	11	19	3	9	30	13	1	0	14	11	18	12	19	12	11	8	11	8	3	5	10	5	6	5	4	17	14	4	14	20	15	29	13	12	8	17	24	7
OCPFDLNE_01804	5	8	4	4	4	6	3	15	13	12	7	16	24	5	6	14	11	6	5	26	4	11	8	16	11	8	14	7	8	2	2	7	13	6	6	11	5	11	6	14	18	10	10	10	7	12	6	17	8
OCPFDLNE_01805	6	6	4	3	0	13	9	6	6	3	3	9	17	23	10	10	7	12	5	5	13	6	4	23	5	14	17	7	4	2	5	10	5	3	2	4	3	6	9	2	6	16	9	2	3	2	4	2	3
OCPFDLNE_01806	13	9	5	5	3	16	18	19	27	20	23	44	47	34	29	47	27	20	10	23	16	24	30	51	22	36	49	15	18	11	9	20	25	11	11	12	26	9	15	15	26	30	21	31	22	22	33	39	13
OCPFDLNE_01807	2	2	0	0	3	1	4	11	19	6	16	13	19	10	10	21	10	7	3	28	18	31	33	35	53	24	33	5	6	4	1	2	4	1	2	2	3	2	5	9	8	7	4	10	9	5	5	12	4
OCPFDLNE_01808	7	3	4	3	5	11	4	18	8	11	9	17	29	4	9	15	11	13	0	13	13	9	11	24	14	14	24	5	7	8	4	12	11	3	4	3	6	5	1	5	2	8	7	12	12	8	8	24	10
OCPFDLNE_01809	27	16	12	14	12	38	26	39	34	28	42	46	57	17	22	75	58	14	7	63	38	40	73	116	93	59	102	41	25	20	28	33	36	19	20	30	34	42	51	42	45	44	53	62	48	22	40	73	28
OCPFDLNE_01810	7	9	5	2	8	6	4	5	6	3	5	8	14	7	9	5	13	2	2	12	12	14	26	66	6	12	41	5	16	6	8	9	6	4	12	11	10	8	5	11	7	9	8	11	11	8	4	7	2
OCPFDLNE_01811	0	0	1	1	2	4	0	0	0	2	2	0	15	3	1	5	10	0	1	1	8	8	12	21	3	4	24	1	0	3	1	1	4	0	1	3	4	4	3	3	1	4	3	1	2	2	5	2	3
OCPFDLNE_01812	1	2	0	1	2	0	0	0	0	2	1	2	6	0	1	5	2	1	1	4	2	3	12	10	1	1	3	1	1	0	0	2	2	0	2	1	0	0	1	0	2	1	1	2	1	4	1	3	1
OCPFDLNE_01813	21	20	14	8	7	21	21	20	19	18	15	35	29	12	17	35	29	18	14	23	33	27	42	86	42	36	82	31	28	18	12	27	43	15	14	18	28	18	21	24	22	24	20	34	22	20	24	42	19
OCPFDLNE_01814	20	28	25	12	10	25	25	50	46	38	32	48	86	16	44	73	43	12	14	53	46	50	78	141	70	51	119	44	46	16	35	51	39	20	33	41	45	43	33	48	43	52	43	49	41	35	44	67	25
OCPFDLNE_01815	4	5	5	2	1	7	4	10	8	10	12	10	22	8	13	17	9	3	1	10	7	11	9	18	18	8	14	15	16	3	5	5	11	4	7	14	7	10	3	5	12	6	8	20	9	2	15	16	8
OCPFDLNE_01816	2	0	4	0	4	2	3	18	4	6	3	11	30	8	13	15	12	3	1	9	7	9	12	8	13	11	7	4	8	4	3	8	2	3	3	7	11	10	2	8	15	13	13	19	6	2	10	34	4
OCPFDLNE_01817	18	14	13	9	10	16	9	22	46	22	43	66	57	29	41	63	35	15	9	63	44	36	69	124	79	69	110	23	15	14	25	19	21	10	16	31	35	23	20	34	27	26	42	29	48	14	26	82	13
OCPFDLNE_01818	7	9	6	2	7	20	19	39	41	31	45	57	69	19	35	70	55	17	8	64	55	37	85	107	77	57	79	14	13	9	7	12	23	7	9	8	16	11	19	15	13	19	18	16	20	13	16	41	13
OCPFDLNE_01819	7	4	4	6	4	17	15	21	24	21	24	33	33	20	23	44	31	10	5	38	24	17	37	66	40	25	49	8	5	5	5	10	29	1	4	10	9	13	7	23	18	25	12	31	37	12	30	26	12
OCPFDLNE_01820	4	6	3	1	3	5	12	17	13	15	10	26	25	7	13	23	19	13	0	20	12	15	8	27	41	11	9	5	5	4	9	11	10	1	10	9	7	6	8	11	11	10	6	14	14	14	14	39	11
OCPFDLNE_01821	2	0	1	1	0	5	1	1	7	3	0	4	8	0	2	3	3	0	0	5	0	1	10	9	11	5	7	2	0	1	1	1	6	0	2	1	1	4	1	4	5	0	2	1	4	2	1	11	2
OCPFDLNE_01822	12	10	9	7	11	23	24	31	18	28	23	44	58	13	15	29	30	6	5	24	28	25	23	29	66	30	19	19	17	11	8	9	18	4	3	9	15	10	10	14	25	24	9	21	24	10	19	51	16
OCPFDLNE_01823	15	5	4	6	5	15	8	26	29	22	32	25	43	5	27	26	32	7	8	41	44	21	43	102	39	32	77	11	9	4	13	14	15	7	13	10	10	9	7	19	17	19	18	16	14	12	19	33	10
OCPFDLNE_01824	3	3	1	0	1	4	10	15	11	15	16	28	19	5	7	9	9	2	2	12	14	10	31	45	13	11	32	9	10	8	3	8	14	2	6	4	9	5	3	11	9	10	14	12	23	6	18	22	10
OCPFDLNE_01825	12	11	4	3	5	12	9	12	19	17	10	22	38	18	10	27	26	18	2	24	22	17	22	29	23	23	34	5	16	8	12	14	13	8	15	15	17	10	12	21	18	23	17	31	39	11	16	65	23
OCPFDLNE_01826	33	27	24	8	12	41	30	50	34	35	28	73	98	16	29	71	40	21	2	37	19	54	35	78	67	30	86	42	31	29	26	40	57	22	26	17	44	31	47	41	46	37	37	54	33	35	28	86	30
OCPFDLNE_01827	29	21	12	13	20	34	17	28	29	38	28	48	74	12	33	71	56	11	5	64	31	42	35	76	73	39	62	42	31	18	13	27	48	13	29	34	33	41	33	39	39	40	57	39	33	26	34	97	30
OCPFDLNE_01828	15	1	12	8	4	7	13	14	15	14	4	14	36	5	16	21	16	2	0	21	10	11	15	14	16	13	13	8	16	4	8	22	11	10	10	14	9	15	18	18	8	31	18	19	18	11	27	33	10
OCPFDLNE_01829	32	31	21	12	10	31	19	41	27	22	28	49	68	36	27	77	44	31	11	54	44	30	41	83	65	43	67	30	35	33	14	42	38	18	30	21	36	37	29	28	41	42	48	43	30	43	34	68	27
OCPFDLNE_01830	49	77	28	20	40	70	34	68	74	55	58	93	112	29	63	139	93	27	20	105	62	88	65	168	148	89	161	92	91	58	38	79	112	44	68	77	78	100	69	76	97	115	105	115	88	47	70	156	47
OCPFDLNE_01831	46	44	43	19	24	33	43	55	69	54	57	83	122	30	67	123	110	16	16	101	57	93	77	132	145	58	146	56	60	58	42	75	100	40	66	48	76	91	83	91	85	92	117	127	75	55	73	150	69
OCPFDLNE_01832	20	18	15	22	16	19	31	29	27	44	25	59	57	9	36	46	46	9	5	32	28	24	41	48	43	36	47	29	48	25	22	34	33	23	39	37	47	39	42	66	48	57	81	85	55	34	63	130	50
OCPFDLNE_01833	2	1	1	1	0	0	1	1	2	1	0	5	8	0	4	3	2	0	0	2	2	4	4	8	15	12	17	2	1	1	2	5	1	0	1	1	2	4	1	2	1	0	2	3	2	1	0	2	1
OCPFDLNE_01834	1	4	1	0	1	1	6	8	5	3	4	6	8	2	4	6	5	1	0	2	2	4	5	6	2	3	5	1	4	2	1	1	4	0	2	2	4	3	0	2	2	0	3	1	1	0	2	5	6
OCPFDLNE_01835	18	13	6	14	13	13	15	29	46	19	22	40	51	6	15	37	39	7	3	51	28	31	21	26	51	27	19	15	17	5	18	8	38	8	18	15	28	15	27	19	29	17	18	26	25	12	9	78	13
OCPFDLNE_01836	15	25	13	10	8	21	11	16	11	16	16	19	36	4	20	33	19	3	21	21	16	20	14	57	16	25	47	30	17	17	13	24	30	11	14	18	20	20	21	20	25	16	10	20	7	10	15	23	12
OCPFDLNE_01837	16	17	13	7	15	21	17	17	10	12	10	23	28	0	21	31	26	7	14	28	18	17	19	55	27	30	34	27	36	21	14	39	33	12	30	9	30	32	24	19	26	28	16	22	14	15	21	27	13
OCPFDLNE_01838	10	6	5	0	6	6	5	5	7	5	4	13	7	0	3	10	9	1	3	12	8	4	7	34	17	10	19	20	8	6	2	13	8	8	11	5	8	10	11	4	9	10	14	8	7	8	5	13	7
OCPFDLNE_01839	22	17	23	7	17	16	12	18	20	20	14	18	28	7	11	27	21	12	15	28	21	13	25	55	30	8	45	30	45	21	11	31	36	20	18	17	21	39	8	21	25	30	25	27	17	6	19	24	15
OCPFDLNE_01840	42	31	31	17	21	29	22	22	28	17	20	25	53	11	25	60	30	7	27	46	38	25	50	104	71	58	90	44	66	37	30	46	56	22	42	34	46	53	32	30	26	48	46	42	27	31	35	57	15
OCPFDLNE_01841	32	41	33	18	19	39	30	30	56	35	50	39	84	10	43	102	52	11	36	86	51	59	56	162	120	81	169	48	67	55	29	62	87	42	73	38	67	62	54	58	55	62	67	104	41	46	46	78	34
OCPFDLNE_01842	4	9	1	3	2	6	9	6	9	5	8	6	18	1	8	10	15	1	3	12	8	10	9	11	16	8	21	5	8	6	1	4	3	6	6	9	8	12	6	6	13	8	10	9	9	9	10	12	9
OCPFDLNE_01843	0	2	3	1	1	3	3	1	4	3	3	3	2	2	5	5	6	0	2	10	7	5	2	6	13	5	8	6	2	3	2	4	0	2	3	1	1	2	3	5	2	6	4	6	1	2	5	10	2
OCPFDLNE_01844	6	16	14	5	11	8	14	8	16	20	13	14	21	7	14	29	29	2	4	19	25	14	17	38	26	23	30	18	24	8	15	27	13	7	35	15	22	28	14	13	15	22	37	32	16	17	16	21	22
OCPFDLNE_01845	54	66	46	31	49	65	73	83	106	60	88	110	145	63	87	173	117	50	41	165	90	100	136	290	241	131	259	114	63	65	48	101	118	56	79	69	100	107	82	79	106	91	118	117	84	59	82	160	67
OCPFDLNE_01846	44	38	46	24	31	57	53	68	77	56	94	62	133	35	76	162	100	17	17	109	57	87	91	122	169	86	113	74	89	46	51	85	110	59	65	62	113	108	67	94	103	114	125	115	86	65	104	134	61
OCPFDLNE_01847	2	2	0	0	0	1	2	11	22	9	16	10	15	2	7	23	5	2	4	11	5	8	7	12	29	13	9	1	2	2	2	4	0	1	4	9	5	1	1	7	3	2	6	5	9	3	5	11	5
OCPFDLNE_01848	4	4	3	4	2	14	15	18	51	19	46	36	56	2	35	17	17	4	18	50	21	33	43	91	54	56	55	11	4	2	8	5	6	8	5	4	16	7	15	11	12	13	13	23	21	7	10	27	7
OCPFDLNE_01852	1	2	1	0	1	0	0	3	1	4	4	4	4	0	1	1	6	0	0	0	2	2	2	1	3	2	2	2	3	2	1	2	2	1	4	3	0	0	3	3	3	7	2	3	6	1	1	3	0
OCPFDLNE_01853	2	4	1	1	0	2	1	1	1	1	2	3	8	4	3	2	4	0	0	2	4	6	4	4	4	5	2	0	3	0	0	1	0	1	3	1	4	3	2	3	5	3	4	4	0	2	3	2	5
OCPFDLNE_01854	0	0	0	1	1	1	1	3	5	3	0	4	12	6	2	1	2	11	0	2	2	1	1	0	4	1	1	0	0	0	1	1	1	0	0	2	4	1	1	0	1	0	3	0	1	1	0	4	2
OCPFDLNE_01855	86	92	61	49	67	113	73	78	61	81	49	106	97	21	47	95	53	20	10	87	48	76	51	94	73	55	63	114	126	68	54	113	109	56	85	84	65	72	61	92	87	84	66	101	62	52	79	89	55
OCPFDLNE_01856	3	3	2	0	2	5	7	3	2	5	2	11	9	5	10	13	10	3	1	4	2	3	11	3	11	1	14	5	9	6	4	15	10	3	6	6	10	10	5	8	19	8	8	11	16	7	5	19	7
OCPFDLNE_01857	28	29	20	6	23	24	26	46	58	29	50	68	79	31	33	77	49	21	7	72	30	51	40	106	119	50	56	38	35	28	17	39	47	13	17	28	34	39	40	37	38	33	22	43	43	31	45	111	31
OCPFDLNE_01858	17	10	11	9	12	25	16	33	17	22	19	38	70	8	26	34	26	10	3	23	13	13	9	32	25	30	23	14	10	6	14	11	33	8	11	13	21	9	19	10	13	14	7	10	12	15	16	31	6
OCPFDLNE_01859	41	44	25	11	32	49	38	55	73	50	36	88	108	45	78	93	107	21	10	59	32	49	41	132	90	62	79	54	49	48	50	40	58	20	37	66	61	58	39	56	50	74	48	68	68	31	58	144	52
OCPFDLNE_01860	52	69	19	21	25	42	53	95	80	60	66	126	190	52	72	117	108	29	19	81	41	72	70	138	131	79	114	76	84	38	44	71	114	33	34	64	69	66	66	69	65	100	56	97	101	32	60	189	55
OCPFDLNE_01861	14	8	9	5	5	6	5	7	10	11	10	13	17	34	8	10	9	24	1	8	12	9	7	17	4	6	1	8	5	4	7	4	3	3	8	12	11	7	7	10	11	6	12	14	6	6	7	22	6
OCPFDLNE_01862	0	0	0	0	0	0	0	0	2	0	0	0	0	0	0	0	0	0	0	0	0	0	0	0	0	0	0	0	0	0	0	0	0	0	0	0	0	0	0	0	0	0	0	0	0	0	0	0	0
OCPFDLNE_01863	111	48	29	31	49	62	70	108	95	81	63	194	257	42	66	136	104	40	9	77	48	49	28	123	97	43	109	65	21	18	27	29	124	12	16	22	48	41	26	34	45	23	30	40	34	26	27	115	35
OCPFDLNE_01864	3	4	2	3	3	4	7	4	3	5	3	15	6	1	5	5	3	4	1	9	5	5	3	5	5	3	5	2	9	5	2	7	16	3	4	4	2	3	2	4	7	3	10	8	6	3	6	19	2
OCPFDLNE_01865	15	9	10	3	8	16	6	12	13	8	8	17	18	2	5	15	12	3	1	8	12	14	10	14	7	5	16	14	10	9	10	16	25	6	13	16	16	7	8	16	20	6	7	15	11	7	17	30	7
OCPFDLNE_01866	33	17	17	1	8	39	19	19	15	18	11	23	30	6	15	16	12	3	3	27	11	19	9	31	18	12	21	26	14	13	14	15	49	14	10	15	14	19	15	19	17	18	25	16	10	8	19	25	15
OCPFDLNE_01867	444	391	265	145	176	621	240	383	268	269	211	421	463	171	203	206	192	126	31	285	172	260	125	340	292	167	292	452	331	239	234	317	722	159	203	253	321	258	210	352	265	243	311	297	198	185	212	408	224
OCPFDLNE_01868	1003	1136	703	383	402	1048	491	624	509	456	473	808	757	532	413	693	469	373	104	731	389	738	598	1367	848	677	897	1603	1553	885	784	1311	1835	597	845	884	969	972	709	1204	1232	1136	1186	1297	838	705	836	1211	635
OCPFDLNE_01869	25	20	12	10	13	22	29	39	25	20	16	36	63	25	41	68	45	11	9	39	26	27	31	52	60	38	46	29	34	22	26	38	59	35	33	22	39	39	35	46	75	65	47	42	43	34	50	58	26
OCPFDLNE_01870	21	10	9	10	14	15	10	21	24	25	25	34	33	18	33	34	24	14	1	28	17	13	23	16	34	16	19	32	34	17	26	31	15	22	25	35	44	20	21	50	52	65	54	56	52	41	47	85	36
OCPFDLNE_01871	24	30	20	19	19	31	31	30	42	41	23	59	96	17	29	61	50	7	10	67	33	33	36	58	74	37	46	41	34	27	24	56	61	26	25	34	48	48	42	63	63	42	48	88	48	36	63	89	33
OCPFDLNE_01872	0	1	0	0	1	5	5	4	9	12	8	9	9	0	1	6	9	1	0	1	3	4	2	2	3	0	3	0	0	1	0	2	1	3	1	1	0	1	0	5	1	0	1	4	2	2	4	6	2
OCPFDLNE_01873	25	32	21	7	16	46	47	89	49	71	68	143	218	75	61	137	108	35	6	63	15	53	28	38	62	23	37	47	44	23	17	30	73	27	21	20	47	29	20	33	49	50	35	58	52	37	31	96	44
OCPFDLNE_01874	1	3	0	2	0	1	1	1	0	7	2	2	8	0	1	2	0	0	0	0	1	1	0	3	0	0	3	1	1	1	2	2	3	2	0	4	4	1	2	2	8	0	3	6	1	1	5	6	1
OCPFDLNE_01875	20	30	29	12	9	20	17	24	26	18	15	39	63	3	22	55	28	2	7	39	10	16	29	58	48	28	58	50	46	24	16	29	76	22	34	29	41	44	29	28	44	49	33	57	27	31	39	68	46
OCPFDLNE_01876	0	0	0	0	0	0	0	0	0	0	0	0	3	0	1	0	0	0	0	0	0	0	0	0	3	1	0	0	0	0	0	1	0	0	0	0	0	0	0	0	0	0	0	0	0	0	0	0	0
OCPFDLNE_01877	83	84	38	39	37	89	66	110	92	83	102	142	177	90	73	128	85	65	31	115	81	138	113	246	234	114	179	93	104	65	73	112	128	44	83	90	96	100	69	98	89	110	114	123	99	55	88	152	68
OCPFDLNE_01878	13	12	2	5	9	15	8	5	9	12	7	19	16	3	14	11	11	3	5	15	12	15	13	25	18	8	25	12	17	6	10	16	13	8	14	14	12	9	7	17	16	19	13	19	26	7	13	33	9
OCPFDLNE_01879	15	12	12	10	3	8	13	11	18	14	15	21	19	3	10	28	8	1	1	9	14	14	12	31	37	14	19	29	16	8	5	10	18	6	15	17	16	11	14	19	18	14	20	25	13	12	13	40	13
OCPFDLNE_01880	41	36	27	18	19	27	27	33	38	22	25	52	49	3	43	63	39	5	12	39	40	24	45	64	85	42	78	67	48	38	32	41	60	24	20	32	42	44	36	42	53	43	47	65	47	27	32	81	36
OCPFDLNE_01881	2	2	1	0	1	4	3	4	6	7	4	12	13	4	5	7	9	3	3	4	1	6	3	16	18	7	9	12	5	2	3	3	3	1	4	5	7	6	4	1	3	6	3	4	8	7	5	17	12
OCPFDLNE_01882	38	35	33	20	18	64	50	71	49	83	40	67	132	23	74	77	83	28	5	57	44	40	18	32	83	27	31	59	33	24	48	45	68	26	40	35	63	36	45	42	39	31	24	17	44	45	20	110	33
OCPFDLNE_01883	12	18	12	2	11	19	14	17	13	14	13	20	32	8	16	35	30	2	2	18	12	18	28	29	43	18	35	31	24	21	22	14	27	12	16	15	36	23	20	16	28	33	27	37	21	15	29	45	16
OCPFDLNE_01884	12	17	10	7	5	16	11	19	14	27	15	28	46	7	25	40	42	5	3	19	18	25	18	40	47	19	28	28	18	9	12	16	13	11	22	17	17	20	18	19	32	26	32	26	17	18	28	35	30
OCPFDLNE_01885	9	9	8	1	3	10	7	6	10	5	5	22	35	5	22	25	27	9	1	19	8	20	13	24	36	14	25	5	6	11	6	8	10	13	10	9	10	14	13	18	16	17	21	38	16	14	12	27	17
OCPFDLNE_01886	0	4	2	0	1	2	5	2	6	1	2	4	9	1	0	10	2	3	0	3	2	3	2	4	5	0	4	4	6	1	3	5	5	3	4	2	3	8	5	4	7	8	4	11	11	6	10	28	8
OCPFDLNE_01887	19	29	16	7	11	19	21	17	24	26	16	30	51	8	29	54	38	5	8	63	27	35	46	65	59	28	62	27	18	27	14	26	47	9	27	25	34	27	26	32	37	30	41	42	13	31	33	57	25
OCPFDLNE_01888	12	23	17	7	14	19	9	19	22	12	15	23	30	21	22	29	40	14	5	40	18	17	25	49	37	21	42	16	26	17	13	14	24	14	11	11	14	16	20	14	19	19	20	34	19	22	20	33	22
OCPFDLNE_01889	16	11	12	3	12	15	9	17	17	18	15	30	36	11	7	28	20	8	4	14	12	14	17	30	34	24	36	19	10	11	5	12	16	5	11	11	10	14	12	7	19	11	16	13	6	13	14	28	10
OCPFDLNE_01890	27	35	25	11	11	32	39	65	60	74	49	106	107	56	61	78	51	41	8	73	46	68	52	108	131	79	137	42	38	28	21	37	79	24	34	32	54	51	57	62	56	47	49	64	69	45	55	102	39
OCPFDLNE_01891	5	4	1	1	0	5	5	12	4	4	8	21	18	12	9	14	11	4	3	7	10	11	9	14	21	16	17	3	3	1	2	9	5	3	2	8	5	7	6	8	3	9	9	7	14	5	11	10	4
OCPFDLNE_01892	19	12	4	5	15	40	24	51	35	29	38	49	91	13	48	33	22	17	3	46	21	23	18	15	30	16	15	10	4	7	4	3	14	4	9	7	14	5	7	20	5	7	15	8	13	11	11	32	16
OCPFDLNE_01893	6	5	9	5	4	10	5	8	9	3	8	10	18	3	9	22	9	4	1	10	2	8	6	17	4	4	8	11	7	7	3	7	18	3	3	5	6	8	6	13	4	8	16	3	5	2	7	9	10
OCPFDLNE_01894	19	20	19	6	11	27	8	24	13	11	14	19	34	12	21	31	25	17	3	15	9	8	10	29	21	17	30	20	30	16	8	16	26	14	17	13	16	18	21	14	31	19	19	18	19	9	17	24	13
OCPFDLNE_01895	41	53	30	18	25	44	32	44	54	28	26	56	71	9	31	67	39	8	7	52	25	37	37	81	66	41	67	58	52	45	29	61	70	36	46	45	55	54	43	53	50	67	66	90	43	39	58	108	57
OCPFDLNE_01896	129	113	79	51	58	131	74	81	94	72	106	127	124	28	99	203	125	30	33	108	66	118	131	236	150	137	186	146	187	119	81	142	176	85	132	103	124	135	137	150	141	139	180	142	105	91	126	200	107
OCPFDLNE_01897	21	16	18	8	9	22	17	16	26	14	14	22	46	11	21	41	28	6	8	33	18	20	35	49	41	27	48	34	28	21	8	24	38	12	31	32	45	23	33	22	22	50	31	40	28	29	27	55	19
OCPFDLNE_01898	46	34	21	12	22	32	24	26	32	24	25	27	69	18	43	63	51	7	7	49	23	29	38	61	47	45	84	39	44	28	18	52	57	27	21	40	28	54	39	28	42	45	61	40	30	25	34	60	37
OCPFDLNE_01899	28	30	22	9	17	10	20	18	34	17	15	24	36	5	28	34	29	11	3	38	9	34	25	54	37	30	44	37	52	29	18	43	49	22	33	36	19	45	25	23	36	23	52	51	28	19	37	54	23
OCPFDLNE_01900	62	67	46	16	40	62	42	65	67	49	55	80	106	16	72	91	66	10	24	97	37	63	64	124	103	64	131	79	76	56	42	77	104	59	79	72	64	93	56	65	99	89	94	110	46	57	78	117	44
OCPFDLNE_01901	9	5	3	3	3	7	7	9	11	6	9	9	27	3	10	23	12	1	2	22	4	9	11	17	30	9	13	8	7	8	1	13	25	9	7	14	10	14	6	15	16	10	10	31	17	6	21	17	11
OCPFDLNE_01902	0	0	2	0	1	1	0	0	0	2	1	1	2	0	5	1	0	3	1	0	0	2	0	0	0	0	0	0	0	0	0	1	3	0	1	0	3	0	0	1	0	0	0	0	0	0	0	2	0
OCPFDLNE_01903	12	4	9	1	3	14	9	17	17	20	19	45	25	21	18	39	30	12	3	35	19	27	30	39	32	28	45	17	10	13	7	12	24	4	5	6	17	7	23	19	14	10	18	36	14	20	16	41	18
OCPFDLNE_01904	0	2	0	0	1	5	8	17	12	11	10	23	19	9	13	29	18	5	2	20	13	21	15	36	46	25	31	5	8	5	3	6	12	3	15	5	16	9	14	17	25	17	18	22	23	18	21	33	20
OCPFDLNE_01905	16	19	20	7	6	22	26	45	48	32	50	54	105	13	41	127	79	8	17	71	62	39	90	139	83	55	98	36	35	19	16	36	40	31	38	30	50	51	41	58	53	66	61	49	41	31	56	87	35
OCPFDLNE_01906	288	182	157	116	100	211	125	166	163	173	95	251	303	69	131	161	135	44	12	178	98	123	98	138	173	119	130	257	206	165	153	175	371	107	140	176	218	167	157	227	228	187	222	236	161	185	220	288	145
OCPFDLNE_01907	5	1	1	0	2	2	1	2	4	4	1	4	8	9	7	9	0	6	0	5	4	5	3	8	6	4	10	1	5	3	3	9	3	2	5	1	6	2	2	2	6	3	12	13	5	5	9	10	7
OCPFDLNE_01908	3	3	1	1	1	6	4	3	3	7	5	8	11	18	6	10	7	7	2	13	2	7	2	12	14	2	12	7	4	2	1	5	7	2	5	10	10	11	8	6	10	6	13	17	2	4	8	12	6
OCPFDLNE_01909	5	6	4	2	0	11	6	3	6	4	3	5	12	4	9	24	13	3	2	17	7	7	10	16	20	9	9	11	12	7	4	7	7	9	10	5	7	8	9	2	10	12	18	22	6	8	14	18	7
OCPFDLNE_01910	2	9	1	1	3	5	5	4	5	4	5	5	9	3	11	16	16	2	4	6	4	4	6	6	14	7	21	6	9	11	3	11	14	3	10	5	8	17	2	3	13	8	14	10	9	6	5	15	9
OCPFDLNE_01911	7	21	5	4	12	7	17	11	17	14	31	21	72	17	36	65	53	6	1	24	11	20	22	25	39	23	29	25	25	20	5	34	29	28	32	35	38	46	27	40	49	44	67	59	27	24	26	81	33
OCPFDLNE_01912	4	4	0	2	4	5	4	2	9	8	4	19	31	14	21	23	22	1	1	11	6	4	14	11	21	9	12	5	5	2	3	8	16	10	11	7	9	15	14	18	13	18	25	23	8	13	5	37	15
OCPFDLNE_01913	2	4	1	1	2	3	6	2	12	3	9	11	39	13	21	34	22	4	3	15	6	6	12	11	11	7	12	15	5	5	9	10	6	6	7	12	11	14	17	11	20	23	24	31	15	6	16	22	11
OCPFDLNE_01914	2	3	0	0	3	6	1	0	1	7	3	5	21	16	6	17	16	4	2	4	1	4	2	1	0	2	9	6	2	2	1	2	5	5	6	5	7	4	3	7	4	9	11	17	5	4	5	18	5
OCPFDLNE_01915	0	1	2	1	1	2	4	4	6	2	3	11	33	9	11	24	13	0	2	6	0	6	6	3	5	8	5	7	0	2	4	4	5	4	1	1	4	6	6	5	8	17	15	25	5	5	9	26	2
OCPFDLNE_01916	2	2	4	1	1	0	3	17	11	5	4	11	27	13	12	29	24	3	1	7	2	4	4	10	15	4	6	6	1	3	2	5	12	4	4	7	7	3	7	10	7	9	7	22	13	4	11	28	11
OCPFDLNE_01917	0	0	0	0	0	1	0	0	1	0	0	0	0	0	0	0	0	1	0	2	0	0	0	0	0	0	0	0	0	0	0	0	0	0	0	0	0	0	0	0	0	0	0	0	0	0	0	0	0
OCPFDLNE_01918	0	0	0	0	0	0	2	2	0	2	1	1	6	0	2	0	0	0	0	1	2	2	2	1	0	0	1	1	1	0	1	0	0	0	0	1	1	1	0	0	0	0	0	0	0	0	0	4	0
OCPFDLNE_01919	10	21	10	2	7	8	14	24	25	18	20	26	52	18	34	75	39	12	12	40	41	40	39	103	64	50	113	25	16	9	7	14	29	12	20	17	22	10	17	8	18	29	30	32	29	19	27	39	11
OCPFDLNE_01920	4	3	1	4	1	2	3	7	9	3	5	14	15	8	5	22	6	6	1	11	5	14	12	28	13	12	18	7	1	1	1	3	2	5	6	4	9	1	4	4	2	8	10	13	8	5	5	10	3
OCPFDLNE_01921	21	26	10	11	22	25	33	42	33	33	36	50	101	33	28	100	55	18	12	84	39	43	88	168	77	105	180	31	34	22	25	52	42	23	32	19	47	40	43	38	41	22	46	44	28	27	21	51	30
OCPFDLNE_01922	11	8	8	4	7	9	10	9	14	12	7	17	32	3	14	16	11	3	3	9	7	10	15	18	16	13	24	21	18	8	9	13	19	13	11	10	10	8	15	10	10	16	22	12	10	11	12	20	13
OCPFDLNE_01923	595	680	467	227	303	600	437	772	672	474	573	795	845	301	554	1252	692	233	209	1114	590	899	984	2065	1600	1055	1632	829	855	493	617	777	905	409	606	645	792	664	663	789	722	775	823	844	609	510	681	1722	570
OCPFDLNE_01924	225	274	169	103	129	237	213	375	265	231	275	379	448	147	272	645	354	123	84	622	295	502	583	1015	888	505	776	338	360	197	190	368	380	172	270	286	315	325	301	342	384	387	509	481	288	224	338	645	275
OCPFDLNE_01925	159	175	118	67	99	224	220	310	312	291	283	530	569	75	377	624	453	36	61	872	320	720	645	976	1215	499	877	265	277	188	173	281	409	143	254	242	338	284	266	393	452	464	518	634	549	263	424	779	316
OCPFDLNE_01926	8	6	3	3	2	7	4	6	9	6	6	19	24	5	17	11	19	2	3	8	6	7	4	15	11	6	15	10	5	5	7	7	2	7	9	3	12	5	4	9	11	4	9	7	11	3	10	9	10
OCPFDLNE_01927	25	27	13	7	7	14	22	42	29	30	32	63	87	12	39	67	41	18	4	30	18	46	42	68	70	31	78	26	26	16	15	31	28	14	27	17	24	28	26	53	34	50	55	47	43	35	35	75	18
OCPFDLNE_01928	5	0	2	0	0	3	0	4	6	2	0	5	3	1	8	2	4	1	1	2	3	1	5	3	4	4	4	1	3	3	1	1	0	0	3	3	1	1	2	1	2	0	0	1	4	3	1	7	1
OCPFDLNE_01929	62	66	43	20	27	82	45	75	66	58	72	98	111	17	61	124	81	28	18	109	57	119	89	167	133	109	150	73	85	68	53	80	111	44	68	60	81	71	78	86	90	116	94	117	71	45	97	141	61
OCPFDLNE_01930	6	5	0	3	2	2	0	7	2	2	9	13	18	12	5	12	7	9	2	5	3	5	3	6	4	7	2	3	8	9	3	8	8	4	9	9	9	10	9	8	18	12	12	6	4	8	12	21	3
OCPFDLNE_01931	192	159	96	50	90	150	127	233	256	149	150	283	329	132	190	354	234	139	39	203	126	165	159	351	366	242	264	185	210	119	163	228	288	105	159	210	254	182	217	234	243	229	201	294	259	120	209	656	145
OCPFDLNE_01932	28	37	19	8	11	28	29	44	49	37	36	61	93	18	44	82	49	12	1	41	24	37	45	71	92	58	73	33	40	27	28	35	36	19	34	51	45	43	53	71	62	74	81	88	52	55	62	142	46
OCPFDLNE_01933	10	2	8	5	3	5	16	7	14	19	9	13	20	7	15	20	20	11	1	12	8	7	14	16	18	18	12	12	22	15	18	12	15	7	15	12	10	21	20	32	12	21	15	20	36	14	15	41	19
OCPFDLNE_01934	17	19	16	5	15	25	12	19	24	18	23	24	45	31	32	51	34	15	6	21	19	28	27	36	30	21	20	33	55	24	20	52	28	26	39	33	50	44	47	42	41	47	65	67	38	33	42	82	32
OCPFDLNE_01935	50	63	48	16	27	56	37	62	47	49	52	66	67	21	32	95	52	18	11	61	37	33	31	58	59	33	64	76	61	68	32	74	96	43	51	50	65	64	42	52	61	53	62	79	43	54	55	78	45
OCPFDLNE_01936	147	135	115	86	81	135	100	149	166	108	132	167	164	23	132	227	154	19	35	188	123	128	157	291	183	152	197	211	240	156	128	212	209	100	185	154	179	182	131	195	210	226	238	216	140	144	198	248	127
OCPFDLNE_01937	2	2	4	0	3	8	1	6	6	4	9	13	25	5	9	9	6	1	1	13	2	9	8	12	15	5	15	3	6	3	1	4	8	5	3	5	10	8	7	6	7	4	9	13	4	1	5	24	4
OCPFDLNE_01938	5	6	2	3	2	5	9	7	15	4	9	21	26	13	15	24	17	13	1	18	10	11	17	24	26	23	28	16	11	12	10	13	15	6	11	15	8	11	11	12	17	19	18	18	10	8	15	37	12
OCPFDLNE_01939	23	29	21	10	18	33	45	74	75	55	52	104	119	55	45	122	84	24	3	53	34	52	55	77	78	35	51	37	37	13	16	34	58	13	29	34	48	38	37	60	64	79	58	64	75	34	46	147	43
OCPFDLNE_01940	40	39	19	16	21	47	47	65	62	54	38	89	165	38	84	123	83	29	7	68	42	36	52	73	61	26	55	66	45	33	43	65	77	32	55	60	69	68	48	63	74	89	76	81	65	57	63	129	50
OCPFDLNE_01941	9	8	7	3	4	9	23	32	23	34	13	42	101	2	43	81	42	6	2	34	13	19	24	28	18	19	33	21	15	8	10	18	31	17	31	17	42	44	54	74	67	74	88	102	54	44	66	101	56
OCPFDLNE_01942	6	16	13	7	8	18	29	32	48	43	32	51	124	20	54	138	65	10	6	59	22	29	35	40	45	22	32	18	34	18	9	26	52	37	39	39	64	68	56	83	107	103	120	125	79	62	105	142	73
OCPFDLNE_01943	89	150	138	48	101	187	302	373	405	332	411	515	889	72	482	1187	784	88	112	547	243	316	312	510	521	326	548	278	282	197	125	307	417	205	363	241	430	444	449	502	624	622	708	864	404	420	597	901	485
OCPFDLNE_01944	1	0	1	1	3	4	4	7	4	3	6	5	16	11	2	4	5	5	0	2	1	2	1	0	0	2	3	6	5	1	1	3	6	2	4	1	4	1	3	2	1	3	6	4	7	1	3	10	3
OCPFDLNE_01945	24	16	16	8	8	14	17	15	14	25	13	28	43	31	15	23	20	25	2	15	16	19	23	26	31	16	21	30	23	16	22	27	34	8	22	44	24	13	32	39	53	30	25	31	36	30	25	67	24
OCPFDLNE_01946	2	4	0	0	0	1	2	1	5	3	3	4	2	2	3	4	1	1	0	5	1	1	0	7	3	2	0	0	0	0	1	2	0	2	2	1	2	0	6	3	1	1	3	1	2	2	3	6	1
OCPFDLNE_01947	14	15	12	6	8	14	14	16	15	9	12	48	44	8	23	23	27	4	1	24	12	25	16	32	34	21	23	23	22	16	9	7	21	12	13	9	18	15	17	12	25	29	25	30	33	20	31	67	20
OCPFDLNE_01948	1	0	0	1	2	0	0	4	1	2	1	1	5	1	3	0	3	3	1	1	0	0	1	2	2	0	0	1	4	3	0	2	3	0	1	1	2	2	5	1	0	3	3	6	0	1	5	7	4
OCPFDLNE_01949	4	7	9	3	2	14	5	7	9	13	3	9	27	11	11	17	10	7	1	8	5	11	9	16	14	10	16	5	7	7	1	4	18	5	7	9	6	17	10	5	7	8	14	6	12	6	8	13	6
OCPFDLNE_01950	16	32	12	5	10	33	14	21	26	17	16	29	62	15	23	62	38	11	9	43	41	33	32	65	50	35	71	39	26	28	22	34	40	9	30	18	18	22	20	31	31	44	40	32	16	20	37	36	23
OCPFDLNE_01951	32	28	28	8	19	25	36	40	62	46	60	64	82	21	57	82	78	14	17	86	48	75	69	108	130	66	112	74	59	35	30	61	63	33	46	42	50	57	53	69	82	87	90	101	69	43	73	120	60
OCPFDLNE_01952	106	97	62	34	56	92	93	107	105	102	119	139	188	39	126	231	178	21	32	139	66	111	94	134	182	77	165	145	153	86	63	139	143	90	103	91	150	130	124	141	143	186	176	269	123	137	192	229	143
OCPFDLNE_01953	41	33	36	21	19	36	45	102	89	67	67	125	151	63	92	130	94	50	13	111	61	95	59	97	167	80	81	43	44	28	29	36	82	18	26	35	64	33	67	50	43	69	40	76	59	39	43	205	46
OCPFDLNE_01954	42	34	36	18	19	55	44	86	93	64	59	87	96	71	50	72	69	67	14	96	49	43	48	62	89	54	48	39	49	28	45	39	38	22	39	40	75	32	57	73	47	47	27	44	50	43	30	107	35
OCPFDLNE_01955	36	21	22	23	13	32	18	24	29	13	10	40	35	1	10	26	11	1	12	24	15	21	21	79	40	24	48	26	19	6	16	21	45	8	3	13	30	14	14	9	13	9	12	17	12	8	9	36	5
OCPFDLNE_01956	46	80	32	23	34	49	49	67	78	57	60	88	64	46	28	54	42	55	10	67	34	45	42	78	68	39	58	65	43	30	35	50	81	30	30	44	43	46	48	34	27	29	42	23	31	15	26	45	9
OCPFDLNE_01957	32	28	25	17	16	37	23	32	29	35	32	53	34	8	18	44	24	5	11	47	17	32	44	52	50	30	42	42	51	29	21	34	53	24	26	33	42	36	19	26	29	21	20	33	17	14	21	25	12
OCPFDLNE_01958	41	32	23	25	25	75	32	46	40	46	34	73	66	42	47	23	27	25	10	29	23	25	18	46	28	20	25	39	45	19	27	27	45	21	17	23	30	21	18	52	40	20	37	30	23	14	25	36	23
OCPFDLNE_01959	1	1	1	0	0	2	0	2	2	0	2	0	7	1	0	6	5	1	0	2	3	2	0	6	3	1	2	0	0	2	0	2	1	1	0	0	2	0	1	2	6	2	2	1	1	1	3	3	1
OCPFDLNE_01960	1	0	0	0	4	3	0	1	2	2	2	5	4	2	0	4	5	1	1	6	3	1	2	1	4	0	1	0	1	0	1	0	3	2	1	1	1	4	0	3	4	0	3	2	2	0	1	4	2
OCPFDLNE_01961	108	80	58	29	51	98	46	75	60	39	52	81	133	15	71	124	77	11	9	86	61	58	69	118	135	65	78	113	92	56	63	74	133	39	65	69	87	72	61	81	93	70	90	98	74	44	80	164	61
OCPFDLNE_01962	42	40	26	20	22	43	28	36	39	29	29	58	93	27	27	61	38	14	5	35	22	34	39	66	78	39	44	41	48	28	24	59	85	31	32	36	56	40	33	43	54	41	62	56	36	28	45	88	46
OCPFDLNE_01963	283	554	642	71	81	1104	808	1280	897	1155	923	1126	940	733	1426	749	717	1051	453	1201	880	563	571	870	635	863	574	501	275	323	999	313	309	357	534	531	882	513	547	660	394	338	431	357	728	663	638	1560	812
OCPFDLNE_01964	94	77	57	44	62	139	96	151	116	93	72	197	278	119	78	164	97	89	8	99	38	85	66	100	117	59	85	95	78	63	61	78	174	46	51	64	86	74	80	107	107	118	100	121	85	77	92	173	88
OCPFDLNE_01965	11	4	10	6	6	11	6	10	17	7	15	8	18	13	6	24	16	12	2	17	10	13	15	37	26	13	13	29	19	14	10	15	16	17	16	25	22	21	20	17	38	40	23	28	20	18	25	29	16
OCPFDLNE_01966	9	6	3	4	4	6	5	11	7	8	5	9	8	6	6	11	15	5	0	10	9	6	7	14	10	5	6	5	4	1	9	9	3	5	14	13	13	9	9	7	4	14	17	7	11	10	13	10	6
OCPFDLNE_01967	13	16	10	9	15	20	25	38	42	26	30	69	80	39	35	74	59	17	16	55	44	49	51	146	83	50	121	17	19	18	11	26	31	10	10	20	17	38	10	23	22	24	40	34	26	17	29	61	26
OCPFDLNE_01968	63	79	54	27	26	66	55	95	112	83	129	130	222	135	140	273	152	86	36	242	131	173	265	481	365	191	490	129	113	83	69	155	179	87	95	74	100	163	119	128	185	149	167	184	131	99	131	222	121
OCPFDLNE_01969	40	31	27	13	21	40	15	23	35	22	22	41	38	19	18	40	28	19	4	32	10	11	22	36	20	22	30	28	32	16	12	39	45	12	17	16	26	26	15	21	27	23	25	28	13	19	16	43	13
OCPFDLNE_01970	45	41	21	16	19	44	19	27	43	33	29	46	32	49	36	57	34	28	7	50	18	27	34	71	66	31	51	67	71	32	23	49	68	28	48	43	43	49	38	40	55	53	44	65	20	21	36	61	34
OCPFDLNE_01971	57	54	44	41	25	42	41	52	42	47	38	58	82	63	53	84	78	37	9	60	36	48	45	70	72	35	53	81	79	43	43	86	77	42	57	66	62	68	56	93	93	89	91	99	81	61	70	130	47
OCPFDLNE_01972	43	41	48	19	17	55	39	72	45	42	45	88	118	31	64	88	72	31	14	64	48	45	53	117	93	82	89	53	50	28	37	46	127	24	30	51	47	45	43	47	45	48	68	94	47	38	72	95	39
OCPFDLNE_01973	30	33	12	18	17	23	29	41	22	21	23	53	40	9	25	48	32	8	11	52	18	40	67	91	79	59	65	40	34	20	13	27	27	10	12	26	27	20	35	41	31	49	42	52	45	25	33	66	19
OCPFDLNE_01974	12	12	5	5	5	12	8	10	15	16	10	15	22	5	12	36	18	4	5	21	18	27	18	46	37	30	40	15	12	11	7	14	26	10	10	15	17	13	19	19	30	28	24	29	16	17	17	36	8
OCPFDLNE_01975	21	21	12	6	6	17	28	27	19	15	19	24	50	17	28	51	30	13	7	48	28	37	33	76	62	32	57	24	31	20	17	15	37	14	15	16	29	14	18	22	30	25	29	34	23	22	17	45	22
OCPFDLNE_01976	34	10	16	10	11	22	7	27	34	23	11	21	31	21	17	41	21	26	9	18	25	21	19	63	36	25	43	26	14	13	16	23	17	11	17	15	21	30	13	16	12	29	15	16	10	13	13	24	16
OCPFDLNE_01977	41	45	22	22	17	32	34	37	55	35	34	54	80	13	46	76	61	15	22	66	33	58	55	143	85	69	120	62	67	39	34	49	54	20	37	38	52	36	32	36	45	44	40	48	47	26	40	57	23
OCPFDLNE_01978	28	23	14	10	18	38	22	28	30	31	33	55	62	6	32	40	44	5	18	37	16	38	42	86	48	41	79	30	32	25	22	43	52	11	16	25	20	31	18	25	28	36	29	29	40	20	22	39	18
OCPFDLNE_01979	0	4	2	1	0	1	2	1	3	0	1	5	9	1	2	2	2	3	0	2	0	1	1	4	1	2	0	1	1	0	1	3	4	1	0	2	1	3	2	1	1	1	3	4	3	6	1	3	3
OCPFDLNE_01980	58	68	51	26	29	86	36	55	43	36	22	71	86	8	40	86	64	11	8	69	38	49	34	112	91	69	84	83	92	50	56	71	107	34	39	56	71	66	50	70	79	74	75	81	55	36	68	140	48
OCPFDLNE_01981	102	81	50	36	46	94	59	87	91	56	65	113	119	12	72	85	71	5	16	94	60	78	60	167	136	72	99	103	84	57	63	91	156	48	64	86	97	84	61	123	89	103	117	96	78	55	89	167	64
OCPFDLNE_01982	14	12	15	4	3	14	10	11	9	9	7	22	32	4	5	21	11	5	3	20	13	12	11	27	19	12	21	19	26	13	11	20	28	16	13	17	16	20	20	18	30	34	25	33	11	12	30	25	10
OCPFDLNE_01983	20	23	8	13	20	38	22	21	16	21	22	40	66	10	31	28	34	8	10	48	31	21	50	61	48	23	54	31	38	15	20	24	40	18	22	16	40	39	26	50	39	34	39	55	33	31	50	44	26
OCPFDLNE_01984	1	0	1	0	2	3	1	3	2	2	2	7	8	5	5	7	8	0	2	3	3	4	11	9	7	7	21	10	7	2	1	5	6	2	3	5	6	6	3	3	3	6	4	5	3	1	1	7	3
OCPFDLNE_01985	2	5	0	1	0	3	3	1	1	1	0	6	10	0	3	6	4	0	2	8	5	3	4	13	15	4	12	2	4	1	1	6	1	0	0	5	1	1	3	4	1	6	1	5	3	0	4	5	1
OCPFDLNE_01986	3	5	1	2	2	0	1	4	7	4	7	4	9	0	10	11	7	0	4	7	4	7	10	16	11	7	11	6	6	5	3	6	2	1	8	1	8	6	1	5	7	8	6	11	7	3	4	9	4
OCPFDLNE_01987	10	5	6	9	5	17	10	6	4	7	6	11	20	0	5	5	5	0	1	4	1	2	4	6	3	1	3	15	18	4	5	9	17	6	7	15	11	12	10	20	26	13	9	19	22	8	13	36	17
OCPFDLNE_01988	53	43	36	29	39	56	36	33	32	38	30	62	80	9	29	38	31	5	5	35	15	36	22	48	44	27	38	77	79	47	51	50	92	32	53	68	58	69	52	71	100	92	92	85	75	52	84	120	61
OCPFDLNE_01989	95	68	45	31	30	100	35	54	52	37	31	73	99	29	43	63	48	11	8	71	35	44	36	122	55	68	90	117	129	87	82	90	150	50	72	119	97	124	58	120	116	138	139	138	124	63	108	181	79
OCPFDLNE_01990	67	52	27	20	32	63	34	46	47	22	40	61	79	23	41	55	40	15	9	51	28	41	31	117	69	64	74	74	70	35	47	68	71	23	38	41	63	59	47	55	64	63	50	85	66	29	53	137	40
OCPFDLNE_01991	19	16	5	2	8	9	8	8	13	11	9	12	35	8	11	30	19	10	3	21	8	14	19	28	31	19	18	16	12	15	8	19	17	10	11	9	8	11	11	11	18	17	17	14	15	6	18	26	13
OCPFDLNE_01992	3	7	7	7	8	7	12	4	6	5	12	7	21	2	11	19	15	0	3	12	6	17	11	28	25	13	20	19	20	11	3	11	12	5	12	13	12	20	11	16	23	16	19	13	10	14	23	23	9
OCPFDLNE_01993	1238	954	590	384	387	1085	416	552	459	424	388	629	861	421	476	932	563	302	69	630	268	660	375	519	842	559	456	959	1002	574	441	817	1012	418	528	534	629	524	407	584	602	508	631	538	411	335	495	759	335
OCPFDLNE_01994	4	16	9	6	6	4	9	16	20	19	17	30	31	20	11	31	25	9	9	24	20	36	37	67	42	28	53	13	20	8	13	12	29	14	12	26	17	19	17	18	17	16	17	29	26	16	18	33	15
OCPFDLNE_01995	34	45	28	26	23	39	44	59	43	49	55	107	110	69	39	85	51	56	6	61	20	58	37	63	85	41	70	41	20	26	21	49	86	18	26	29	33	39	34	49	59	50	38	56	46	39	41	49	37
OCPFDLNE_01996	0	3	1	3	1	3	2	5	7	2	1	13	11	0	3	6	4	0	2	11	2	7	5	5	5	0	5	2	1	6	1	2	2	2	1	1	5	8	5	5	2	3	3	6	5	7	6	7	0
OCPFDLNE_01997	14	14	9	9	11	12	21	32	51	36	47	51	63	24	18	47	33	25	6	25	29	34	33	47	63	30	47	12	21	7	5	18	39	6	21	12	19	9	20	30	21	22	27	45	37	11	27	85	12
OCPFDLNE_01998	14	17	21	9	10	32	36	37	45	56	59	55	69	31	43	83	55	26	9	65	49	57	94	137	90	59	96	32	31	21	20	44	43	27	19	35	29	37	25	41	36	58	48	63	51	27	60	71	38
OCPFDLNE_01999	26	18	20	11	14	27	16	31	38	27	21	32	46	1	41	55	22	0	9	40	33	19	42	90	51	34	69	25	52	31	18	37	28	20	31	47	36	32	23	39	49	43	45	55	24	40	41	58	27
OCPFDLNE_02000	12	16	8	3	6	11	3	5	17	10	8	11	37	7	19	31	21	7	3	26	11	13	20	44	23	17	30	12	13	14	6	14	12	10	14	7	19	25	13	16	21	16	15	32	14	16	13	25	12
OCPFDLNE_02001	1	5	4	2	7	6	4	7	11	5	6	2	15	5	7	16	13	1	0	9	3	8	9	17	16	4	20	9	11	3	4	8	14	3	6	7	5	9	4	10	15	14	13	20	5	8	7	13	10
OCPFDLNE_02002	1	2	0	1	1	1	3	2	0	1	0	3	8	0	1	2	3	0	0	3	3	4	1	7	3	0	3	3	3	5	5	1	3	1	2	3	3	5	3	4	5	5	3	2	1	0	3	6	0
OCPFDLNE_02003	9	8	6	1	5	11	9	13	12	11	10	22	26	0	15	31	33	2	0	23	18	22	26	28	29	15	51	22	23	21	10	23	28	14	14	19	20	14	22	36	18	26	27	21	12	14	21	22	18
OCPFDLNE_02004	6	11	8	5	4	5	1	16	14	13	8	14	30	4	10	25	25	5	2	21	18	5	14	21	34	10	26	9	13	6	7	11	20	6	9	8	22	11	12	16	17	21	15	30	21	14	17	20	11
OCPFDLNE_02005	15	15	7	7	4	27	13	13	8	11	17	19	38	10	24	29	22	6	0	21	9	7	5	12	18	9	13	15	9	7	12	13	19	9	9	12	14	23	13	27	19	12	17	30	17	18	12	35	14
OCPFDLNE_02006	33	29	17	13	21	30	20	21	21	30	23	35	66	10	47	50	45	9	6	39	20	28	21	53	40	15	26	46	63	34	30	40	78	39	45	47	55	51	48	68	66	65	64	76	53	41	60	137	38
OCPFDLNE_02007	6	5	5	6	5	6	10	11	15	10	21	23	36	19	21	21	19	16	0	20	11	17	15	16	26	5	11	5	9	8	5	11	14	5	14	10	13	16	8	10	22	27	13	20	16	16	12	37	18
OCPFDLNE_02008	17	12	5	6	10	25	19	36	16	34	10	47	67	2	25	24	28	3	6	31	15	15	16	25	36	13	19	13	9	8	16	12	24	8	14	21	19	16	9	34	26	33	33	26	37	31	40	61	34
OCPFDLNE_02009	3	7	2	2	5	9	9	9	3	13	5	30	20	0	5	7	16	2	0	7	4	5	9	9	12	7	7	8	5	6	4	8	20	5	9	4	4	11	5	20	13	20	18	13	50	14	15	44	5
OCPFDLNE_02010	460	384	298	166	299	1063	510	846	555	741	445	1143	1594	186	708	760	834	292	31	397	160	260	59	105	283	105	80	574	306	283	406	311	973	292	265	358	627	415	460	620	340	417	330	277	418	474	192	1074	416
OCPFDLNE_02011	9	6	5	3	6	12	6	13	13	15	8	28	25	9	11	18	31	8	1	17	10	12	8	9	24	11	9	11	18	6	9	12	19	9	8	17	14	13	13	30	11	23	12	23	12	5	13	37	11
OCPFDLNE_02012	12	18	15	1	7	7	19	27	29	17	29	23	53	13	27	76	47	10	5	37	27	30	45	52	49	31	53	19	29	18	13	15	28	17	21	20	18	17	28	20	19	26	38	39	21	23	25	44	16
OCPFDLNE_02013	33	41	27	15	28	54	47	64	68	63	46	122	145	61	75	152	101	33	19	110	54	74	124	201	172	83	182	64	63	34	36	49	115	35	38	67	54	64	63	74	111	123	104	129	147	49	106	262	66
OCPFDLNE_02014	240	199	119	86	85	179	154	252	270	220	176	435	392	207	193	334	284	172	35	262	148	208	218	371	473	202	306	199	211	125	151	202	277	94	131	195	252	165	188	225	232	249	184	293	253	152	164	540	125
OCPFDLNE_02015	13	12	7	6	7	14	18	21	22	17	27	29	53	19	27	32	27	10	4	19	15	25	17	28	64	35	28	18	13	6	15	11	14	6	18	23	16	10	15	15	24	30	21	15	13	15	19	49	21
OCPFDLNE_02016	13	4	7	0	6	7	10	10	20	9	13	18	33	17	31	27	18	12	2	19	9	18	23	21	44	22	40	12	18	21	17	19	12	7	17	13	22	21	13	18	30	38	23	20	32	12	18	43	7
OCPFDLNE_02017	57	45	28	17	18	45	52	87	104	72	55	140	152	120	85	60	50	74	34	110	72	107	133	167	182	118	129	45	53	29	53	70	79	44	36	68	69	59	55	99	110	96	87	129	145	58	62	264	63
OCPFDLNE_02018	17	9	6	4	4	10	13	15	22	18	11	14	42	7	12	19	17	3	4	26	28	20	37	54	45	29	47	11	18	14	13	16	16	13	14	17	15	14	9	25	23	21	30	29	10	7	11	33	12
OCPFDLNE_02019	4	2	1	0	2	5	12	9	7	11	7	15	12	14	5	16	9	6	4	14	9	5	8	24	15	14	30	5	12	6	4	3	7	5	3	5	8	7	5	11	10	7	3	7	10	9	12	16	9
OCPFDLNE_02020	0	0	0	1	0	2	2	3	0	1	1	0	2	1	1	1	2	1	0	1	2	1	0	0	0	1	1	0	2	0	0	0	0	0	1	0	2	1	1	2	0	0	0	0	1	0	1	2	0
OCPFDLNE_02021	28	19	19	5	10	15	5	19	18	14	9	23	17	0	6	7	11	1	1	3	7	9	18	21	14	9	13	16	16	5	10	16	15	4	5	9	14	8	9	13	9	17	13	21	11	5	5	23	4
OCPFDLNE_02022	3	1	2	0	8	3	0	6	4	3	4	5	5	3	3	6	3	3	1	8	0	8	6	7	7	5	7	5	0	1	5	4	5	1	0	0	1	2	1	1	2	3	3	3	5	2	8	5	2
OCPFDLNE_02023	15	11	13	12	5	13	13	26	33	24	31	23	53	8	38	59	39	15	4	49	23	24	36	73	61	24	68	21	26	19	8	34	35	17	14	14	18	29	19	24	29	29	38	24	30	13	20	48	23
OCPFDLNE_02024	68	58	51	32	36	68	61	140	140	95	111	197	174	75	103	177	132	56	20	154	80	113	114	161	262	108	168	79	59	27	59	72	112	33	51	53	87	65	68	83	69	101	72	115	144	58	87	256	70
OCPFDLNE_02025	13	16	9	2	6	10	12	18	15	29	17	26	28	9	14	31	24	7	1	14	13	23	22	51	19	19	28	22	18	14	10	19	31	17	15	24	15	13	14	23	24	24	30	21	26	21	25	35	14
OCPFDLNE_02026	5	6	2	5	5	11	9	8	9	10	10	9	18	8	11	16	12	7	2	13	6	15	12	22	11	7	26	9	11	7	8	14	23	11	10	19	21	20	12	8	21	29	20	14	7	14	17	15	13
OCPFDLNE_02027	7	9	6	4	6	2	6	5	9	13	6	9	14	9	16	12	19	8	3	11	7	7	8	20	14	14	27	7	20	10	7	15	15	6	15	16	9	15	8	12	15	16	21	24	16	9	9	18	13
OCPFDLNE_02028	3	3	2	1	2	5	5	7	4	8	7	12	22	4	13	18	15	4	1	15	8	5	13	10	18	9	28	11	9	6	4	5	12	0	9	5	9	13	6	10	12	11	13	7	11	8	9	20	8
OCPFDLNE_02029	95	108	71	44	44	138	63	84	90	70	92	120	114	27	54	98	84	31	17	89	39	72	67	161	130	70	121	122	114	73	70	109	189	63	60	56	87	76	71	76	74	67	73	72	52	41	66	130	49
OCPFDLNE_02030	119	113	74	45	54	146	52	120	91	56	86	158	105	64	72	157	98	51	29	122	67	131	80	216	157	109	213	181	143	102	61	159	196	78	89	101	124	111	83	88	103	105	115	130	80	64	89	138	71
OCPFDLNE_02031	84	102	83	57	46	128	57	59	48	48	60	104	103	72	52	114	69	48	18	109	54	95	87	204	114	65	140	110	112	80	66	115	122	46	90	73	87	88	60	85	91	62	91	85	69	41	62	101	54
OCPFDLNE_02032	54	61	45	26	33	69	96	152	154	140	132	297	255	25	151	185	168	21	39	228	144	194	211	433	260	207	367	79	57	40	66	76	167	46	63	64	99	64	78	122	88	115	105	129	128	73	103	198	104
OCPFDLNE_02033	0	2	0	0	1	1	0	1	2	0	0	4	10	1	1	3	3	0	0	2	1	1	0	2	0	1	0	0	3	0	0	0	2	0	5	0	0	1	0	0	0	0	2	0	0	2	0	0	0
OCPFDLNE_02034	0	0	1	0	1	2	3	2	1	1	0	2	9	1	0	2	1	2	0	2	0	1	0	1	0	0	1	1	2	0	0	3	2	0	2	0	1	1	0	0	2	0	0	0	0	0	1	1	1
OCPFDLNE_02035	0	0	0	0	0	2	0	0	0	0	0	1	0	0	0	0	1	0	0	0	1	2	2	2	0	1	2	0	0	1	1	1	2	0	1	0	0	0	0	0	0	0	0	0	1	0	0	2	0
OCPFDLNE_02036	0	1	0	0	0	1	0	2	2	3	2	2	3	4	1	2	1	1	0	1	0	0	5	4	0	0	3	3	0	3	1	0	1	0	3	0	0	2	1	0	4	0	1	0	1	0	1	2	0
OCPFDLNE_02037	1	4	4	1	0	4	0	4	4	5	0	6	10	3	4	3	6	2	3	2	3	3	7	7	3	5	9	4	2	6	2	6	4	0	2	3	3	8	2	2	2	3	4	9	9	4	10	6	2
OCPFDLNE_02038	51	38	29	7	17	34	12	10	19	19	19	12	17	2	7	13	9	2	6	15	16	21	13	22	18	10	30	31	27	20	18	34	43	12	14	17	26	21	2	20	12	12	11	6	4	6	6	15	6
OCPFDLNE_02039	49	50	34	30	18	38	25	22	23	25	19	27	45	12	18	25	16	10	5	32	18	35	18	42	38	19	35	60	77	39	42	55	52	28	28	44	33	48	24	32	31	30	47	34	20	24	19	36	14
OCPFDLNE_02040	29	33	27	25	25	31	27	34	26	28	15	33	29	31	23	26	18	12	5	26	17	27	18	35	32	18	32	61	61	26	27	70	30	18	30	36	42	40	25	20	40	30	32	27	20	16	26	32	18
OCPFDLNE_02041	7	9	2	5	2	7	5	8	5	16	5	14	30	6	13	13	9	4	1	5	3	5	7	9	12	4	7	5	9	7	9	14	10	6	5	7	11	13	7	16	16	6	9	11	11	9	6	31	6
OCPFDLNE_02042	62	49	21	38	22	97	70	101	158	127	86	151	155	381	113	190	166	240	19	110	87	62	155	172	152	94	188	118	114	89	68	124	224	49	90	115	98	119	73	123	196	227	113	215	273	102	183	338	88
OCPFDLNE_02043	180	220	155	81	106	264	257	459	580	397	511	821	637	661	387	827	601	458	115	423	394	388	741	970	714	571	1061	391	387	298	234	512	540	195	278	325	403	411	330	310	382	461	376	474	454	236	386	744	247
OCPFDLNE_02044	0	0	0	0	1	0	2	0	1	0	0	3	5	0	0	2	1	0	0	2	1	2	2	3	4	0	0	1	1	0	0	2	3	1	0	1	1	1	1	1	1	0	0	0	0	1	1	7	0
OCPFDLNE_02045	0	0	1	0	2	0	0	1	0	1	1	1	4	0	1	2	2	0	1	0	1	0	0	4	2	2	11	0	1	0	0	6	1	0	2	0	2	1	1	2	0	1	1	0	2	0	1	2	1
OCPFDLNE_02046	1	0	0	0	0	2	0	1	0	1	2	1	2	0	0	3	0	0	0	4	2	1	1	5	2	4	4	0	0	0	0	0	2	0	1	0	2	1	1	1	0	4	2	0	0	0	0	1	0
OCPFDLNE_02047	2	3	0	1	1	1	3	2	2	2	1	2	11	0	1	2	0	0	0	2	3	4	5	6	3	4	7	3	1	0	2	3	4	2	1	1	1	2	1	0	0	2	0	1	0	0	1	4	0
OCPFDLNE_02048	0	0	0	0	1	1	0	0	1	0	0	0	2	0	1	0	0	0	0	1	0	1	0	0	0	2	2	1	0	0	0	1	0	1	0	0	1	1	0	1	2	0	3	0	0	0	1	0	1
OCPFDLNE_02049	3	2	3	1	0	0	0	2	2	0	2	2	2	0	0	1	5	0	0	2	1	3	0	1	1	2	2	0	0	1	1	3	9	2	0	2	0	1	1	1	4	2	1	1	4	0	2	0	1
[truncated: 1,023 more rows]
[truncated: 59 more columns]

## Sheet: ScottA
	2Sc_2_T0	2Sc_3_T0	2Sc_4_T0	2Sc_3_T5	2Sc_4_T5	2Sc_5_T5	2Sc_2_T10	2Sc_3_T10	2Sc_5_T10	2Sc_1_T30	2Sc_3_T30	2Sc_4_T30	2Sc_2_T45	2Sc_4_T45	2Sc_5_T45	2Sc_1_T60	2Sc_3_T60	2Sc_5_T60	2Sc_2_T6h	2Sc_3_T6h	2Sc_4_T6h	2Sc_1_T24h	2Sc_3_T24h	2Sc_4_T24h	2Sc_2_T48h	2Sc_3_T48h	2Sc_4_T48h	4Sc_1_T0	4Sc_3_T0	4Sc_5_T0	4Sc_1_T5	4Sc_4_T5	4Sc_5_T5	4Sc_1_T10	4Sc_3_T10	4Sc_4_T10	4Sc_1_T30	4Sc_3_T30	4Sc_5_T30	4Sc_3_T45	4Sc_4_T45	4Sc_5_T45	4Sc_3_T60	4Sc_4_T60	4Sc_5_T60	4Sc_3_T6h	4Sc_4_T6h	4Sc_5_T6h	4Sc_1_T24h
Locus_tag/Sample_ID	R_004	R_008	R_014	R_012	R_016	R_020	R_024	R_028	R_038	R_026	R_032	R_036	R_044	R_054	R_060	R_046	R_052	R_062	R_068	R_072	R_078	R_070	R_076	R_080	R_064	R_082	R_088	R_091	R_096	R_106	R_094	R_104	R_108	R_111	R_116	R_122	R_114	R_120	R_128	R_136	R_142	R_148	R_140	R_144	R_150	R_160	R_166	R_172	R_158
LMOSA_10	1	1	0	0	0	1	0	0	0	1	0	0	0	0	1	0	0	0	0	0	2	0	0	0	0	0	0	0	2	1	0	1	0	0	0	0	0	1	0	0	0	0	0	0	0	0	0	1	1
LMOSA_100	0	0	0	0	1	0	1	2	2	0	0	0	1	0	1	0	1	0	0	1	1	2	1	5	0	2	0	2	0	1	1	0	0	1	0	1	1	0	2	0	0	1	0	3	0	0	1	3	0
LMOSA_1000	5	1	0	3	0	2	1	0	1	2	2	0	2	3	3	3	1	2	0	0	1	0	0	7	0	1	5	0	3	1	2	0	0	1	0	0	1	2	1	2	0	3	0	2	2	2	4	1	4
LMOSA_10000	48	24	23	34	36	34	35	33	44	22	48	35	49	37	84	0	83	57	41	44	60	38	79	90	46	89	67	50	16	38	26	43	29	56	32	57	93	55	55	100	172	72	116	108	59	72	83	118	111
LMOSA_10010	1	1	6	2	1	5	3	1	2	3	0	0	0	1	3	7	3	0	2	1	1	3	0	5	0	2	3	4	2	2	3	0	1	3	1	2	4	1	2	11	4	5	4	7	1	5	8	5	7
LMOSA_10020	0	1	0	1	1	0	0	2	0	1	3	0	1	0	0	0	0	0	0	0	2	2	0	1	0	0	0	0	0	0	1	1	1	0	0	2	0	0	1	1	1	1	2	0	0	0	0	0	1
LMOSA_10030	2	0	0	1	3	1	2	1	0	1	3	3	0	0	5	1	4	2	1	2	0	1	3	4	3	5	1	4	0	2	1	2	0	2	2	2	0	2	2	3	1	0	2	1	1	0	0	2	2
LMOSA_10040	17	11	4	9	14	10	14	6	5	8	4	10	15	7	12	7	19	9	3	6	11	2	11	4	11	9	9	10	1	13	4	17	2	9	12	7	9	9	10	8	7	10	4	12	6	5	15	12	6
LMOSA_10050	6	7	6	11	7	11	11	4	14	5	8	9	27	18	26	365	47	14	20	5	17	12	8	11	15	17	13	12	5	15	9	11	10	24	12	25	25	16	24	44	25	25	41	31	23	26	21	35	24
LMOSA_10060	0	0	1	1	1	0	1	0	1	0	3	4	0	0	1	6	0	0	0	1	0	0	3	0	2	4	2	0	0	0	1	3	0	1	1	0	4	0	0	3	4	0	1	2	2	0	0	1	2
LMOSA_10070	3	0	5	2	0	4	5	1	0	1	2	1	2	1	1	1	2	4	1	1	1	0	0	3	1	4	3	0	1	3	1	1	2	2	2	3	7	6	2	7	2	1	3	5	0	0	7	1	3
LMOSA_10080	2	0	0	0	0	0	0	2	0	0	0	1	2	0	1	1	0	2	0	0	0	0	2	4	0	4	1	4	2	1	1	7	2	2	0	5	3	2	2	1	3	1	2	4	1	5	2	10	1
LMOSA_10090	40	26	17	33	38	29	39	38	45	26	25	33	54	33	69	35	95	33	20	17	37	33	29	43	18	41	39	56	31	40	33	39	45	42	33	64	105	78	95	163	117	65	148	125	65	72	101	124	97
LMOSA_1010	53	35	18	42	61	41	34	39	36	49	39	37	56	34	37	138	82	40	37	21	42	27	42	65	58	58	47	51	30	57	23	44	37	37	31	61	59	52	69	101	51	33	63	82	49	46	69	115	73
LMOSA_10100	63	34	28	47	61	46	58	48	33	39	42	62	89	54	68	34	144	81	44	28	52	55	92	78	58	115	63	69	42	47	40	51	42	81	62	117	83	113	108	158	131	91	136	127	94	113	102	154	118
LMOSA_10101	3	4	2	0	0	4	3	3	0	1	0	4	0	4	1	0	2	1	2	3	5	2	2	6	2	3	0	2	2	1	2	6	2	0	2	3	4	6	3	9	11	9	10	9	6	2	2	11	4
LMOSA_10110	2	5	2	6	2	9	6	2	4	0	4	6	3	0	4	1	4	4	1	4	6	2	8	3	5	7	2	8	1	2	0	11	6	2	0	0	3	1	2	7	10	5	6	9	4	3	4	5	10
LMOSA_10120	10	12	11	11	15	10	27	8	10	14	17	11	26	15	19	15	21	27	16	8	21	21	17	29	21	33	24	13	10	12	20	25	9	12	6	11	14	11	11	17	15	10	4	18	3	8	12	24	14
LMOSA_10130	17	11	13	18	20	12	27	17	16	15	23	20	20	18	24	41	27	15	16	10	36	17	20	60	32	52	30	26	21	34	14	25	17	13	6	15	53	20	31	24	29	13	27	36	15	22	15	27	35
LMOSA_10140	5	2	0	4	1	1	2	4	1	3	0	2	3	3	3	1	5	4	1	1	4	2	1	3	2	3	2	2	0	4	0	3	0	2	4	2	1	1	6	4	0	1	3	4	5	3	1	5	3
LMOSA_10150	2	1	2	3	2	2	2	0	2	0	0	0	3	2	1	1	3	4	0	0	2	2	2	1	0	5	1	5	0	1	2	3	2	1	4	3	1	0	2	0	3	2	0	1	1	0	1	2	2
LMOSA_10160	5	1	2	3	3	0	10	2	7	1	3	3	9	3	8	1	7	3	3	4	10	5	11	4	10	11	8	5	3	2	2	7	3	1	2	2	6	1	2	10	5	6	4	7	10	6	3	9	8
LMOSA_10170	4	3	3	2	4	3	3	1	0	6	5	7	6	4	5	2	11	4	7	2	5	5	9	8	5	6	4	3	0	7	2	9	4	4	0	3	2	7	4	2	1	0	2	5	3	5	3	5	2
LMOSA_10180	3	0	0	2	2	2	2	2	3	3	6	4	3	0	3	0	4	6	1	2	1	2	2	5	6	5	5	2	1	3	4	3	3	3	1	2	2	2	0	1	0	1	2	2	0	2	1	3	3
LMOSA_10190	0	2	2	3	0	2	6	2	3	4	1	7	4	5	0	0	4	4	3	3	1	4	4	3	6	3	3	2	1	4	3	3	3	1	3	4	9	1	3	5	4	2	3	2	5	4	2	3	2
LMOSA_1020	16	8	15	12	12	25	18	13	14	10	7	12	16	16	20	2	20	18	15	7	16	12	16	29	11	15	17	24	7	34	6	45	30	25	13	14	39	31	39	61	37	47	51	48	34	37	66	107	64
LMOSA_10200	15	4	6	9	13	7	14	9	21	11	13	26	20	10	19	4	34	17	12	9	9	17	18	19	25	16	18	11	13	15	13	14	12	8	6	4	7	7	17	14	8	4	5	13	4	11	8	20	10
LMOSA_10210	2	4	2	1	4	1	5	1	4	5	3	9	4	7	3	1	14	9	1	2	2	5	8	7	9	8	8	3	2	1	1	2	4	4	0	1	6	0	4	4	0	2	4	2	5	2	3	3	4
LMOSA_10220	4	5	3	6	4	9	6	9	11	12	6	15	11	7	17	0	18	6	6	5	10	7	13	7	15	16	16	14	10	7	9	3	3	5	4	5	11	4	5	8	7	4	7	7	1	5	7	5	5
LMOSA_10230	6	1	1	0	1	2	4	2	2	1	3	4	8	2	4	3	4	0	4	3	3	0	5	4	2	11	4	2	3	4	2	4	1	2	1	0	1	3	0	4	2	2	1	2	3	3	4	1	0
LMOSA_10240	9	3	0	3	6	2	1	5	3	1	2	4	6	5	10	1	15	4	1	5	1	4	7	7	8	7	7	8	0	8	4	7	2	2	2	4	1	2	2	4	2	2	1	9	0	5	3	1	0
LMOSA_10250	6	2	4	1	5	3	2	7	9	5	3	7	8	10	12	0	13	6	9	2	3	6	5	6	2	9	5	5	4	6	6	8	2	4	3	2	4	5	7	6	1	1	3	3	3	3	1	4	3
LMOSA_10260	4	1	1	0	3	0	2	2	1	5	2	4	2	2	4	0	4	1	0	1	2	3	1	1	3	1	2	4	3	0	6	7	1	0	0	2	0	3	0	2	0	0	1	0	2	5	2	3	0
LMOSA_10270	2	2	1	0	0	1	2	2	3	5	1	6	4	0	6	0	7	2	1	0	2	0	1	8	4	3	2	2	0	1	2	1	1	1	2	1	2	0	1	0	3	0	1	4	1	2	0	4	1
LMOSA_10280	8	2	1	2	3	2	8	4	5	3	4	8	8	5	9	0	15	1	4	3	6	2	5	8	6	7	10	8	5	3	3	11	8	8	2	4	5	7	6	4	5	0	5	3	5	4	2	9	5
LMOSA_10290	130	63	58	162	191	128	162	162	187	123	168	151	127	131	209	94	291	136	126	79	148	136	231	214	162	326	192	285	174	151	156	183	197	184	193	202	375	211	268	563	481	449	460	598	325	306	305	433	343
LMOSA_1030	96	50	59	78	58	74	104	66	78	65	46	69	58	60	101	12	87	54	40	25	59	42	68	119	44	60	73	154	52	89	63	90	58	113	65	128	221	128	227	253	142	99	188	177	67	104	141	218	202
LMOSA_10300	81	57	55	50	70	55	93	54	52	50	64	68	100	72	84	105	197	97	65	47	101	53	68	110	75	101	83	73	46	111	49	108	60	70	72	75	163	78	88	122	185	103	134	148	90	108	122	174	129
LMOSA_10310	13	13	6	6	21	17	15	20	16	12	9	18	14	18	31	32	32	16	21	17	28	18	27	36	10	30	26	17	9	14	11	12	14	21	11	18	25	17	26	49	31	33	28	46	24	27	42	56	29
LMOSA_10320	216	179	103	91	135	143	109	145	127	94	106	104	140	90	208	79	245	166	161	70	98	122	94	116	187	89	170	149	104	204	136	211	102	187	117	166	228	137	216	210	273	111	185	195	153	160	171	245	263
LMOSA_10330	61	67	14	43	73	80	47	43	27	58	49	58	55	48	63	104	100	62	61	35	25	43	32	28	51	30	77	29	24	46	58	49	31	73	69	38	88	43	45	50	96	28	51	62	52	51	45	59	77
LMOSA_10340	4	1	5	3	3	5	15	9	7	9	13	10	10	9	8	11	19	9	3	2	9	7	8	6	5	12	8	6	9	7	3	5	7	9	4	12	10	6	10	15	14	6	8	10	13	6	16	13	16
LMOSA_10350	3	1	0	1	2	2	5	6	3	4	1	2	1	5	0	8	0	1	1	0	2	0	0	2	2	0	4	2	1	2	1	3	2	6	4	0	3	1	3	2	0	1	1	3	2	4	1	6	2
LMOSA_10360	6	3	5	1	6	4	5	8	5	5	2	7	8	3	6	1	1	3	1	1	2	2	3	3	3	2	1	2	0	2	1	2	3	7	4	0	5	1	0	7	1	4	2	3	2	0	6	3	0
LMOSA_10370	0	0	0	0	0	0	0	0	0	0	0	0	0	0	0	0	0	0	0	0	0	0	0	0	0	0	0	0	0	0	0	0	0	0	0	0	0	0	0	0	0	0	0	0	0	0	0	0	0
LMOSA_10380	3	0	1	2	0	0	1	0	2	0	1	0	2	2	6	1	7	1	1	1	1	1	2	0	0	3	1	3	4	0	1	1	1	0	1	4	5	2	10	17	10	2	9	5	9	5	10	18	11
LMOSA_10390	0	1	0	0	1	0	1	0	1	0	0	0	3	1	4	3	0	0	0	1	0	0	0	0	1	0	0	1	1	2	2	1	3	3	3	1	5	3	3	6	15	6	10	9	7	3	3	5	9
LMOSA_1040	11	4	5	6	10	8	18	2	9	11	6	8	6	4	9	16	5	11	5	2	9	4	5	13	7	10	6	11	11	10	4	12	8	15	7	6	14	10	7	16	11	9	11	10	10	6	5	7	4
LMOSA_10400	15	11	9	12	18	22	9	5	6	9	7	12	20	11	23	11	16	19	10	5	8	7	9	17	8	11	14	10	6	17	9	8	4	12	11	14	25	20	16	46	47	26	41	43	34	27	37	32	29
LMOSA_10410	8	2	6	6	4	4	4	0	3	0	5	1	3	4	3	0	5	2	1	0	1	0	1	1	1	2	4	3	1	6	0	6	4	3	0	4	11	2	5	4	4	3	8	8	3	2	4	5	4
LMOSA_10420	3	1	2	6	3	2	3	2	3	1	2	3	5	1	1	0	1	6	4	1	1	1	1	0	3	3	1	1	0	4	1	2	2	2	0	1	2	1	0	3	3	2	1	0	0	3	0	4	2
LMOSA_10430	0	0	1	0	0	0	0	0	0	0	0	0	1	0	0	4	0	0	0	0	0	0	0	0	0	1	0	0	0	0	0	1	0	0	1	0	0	1	0	1	1	0	0	1	0	0	0	0	2
LMOSA_10440	0	0	0	0	2	0	0	0	1	0	0	0	3	1	2	11	0	1	0	0	0	0	1	0	1	0	0	0	0	0	0	0	1	1	0	0	1	1	1	0	0	0	0	1	0	0	4	0	1
LMOSA_10441	0	0	0	0	0	0	0	0	0	0	0	0	0	0	0	0	0	0	0	0	0	0	0	0	0	0	0	0	0	0	0	0	0	0	0	0	0	0	0	0	0	0	0	0	0	0	0	0	0
LMOSA_10450	1	0	0	0	0	1	0	0	0	0	0	0	0	0	0	0	0	0	0	0	0	0	0	0	0	0	0	1	0	0	0	3	0	0	0	0	1	0	0	1	0	0	1	0	1	0	0	0	0
LMOSA_10460	0	0	1	0	1	0	0	0	0	0	0	0	0	0	1	0	0	1	0	0	0	0	0	0	0	0	0	0	0	0	0	0	0	0	0	0	0	1	0	0	0	0	0	0	0	0	0	0	0
LMOSA_10470	0	0	0	0	0	0	0	0	0	1	0	0	0	0	0	0	0	1	0	0	0	0	0	0	0	0	0	0	0	0	0	0	0	0	0	0	0	0	0	0	0	0	0	0	0	0	0	0	0
LMOSA_10480	0	1	3	2	1	2	7	7	4	4	10	2	4	1	1	18	3	1	0	0	3	1	1	3	2	1	3	1	3	3	1	0	3	1	2	1	0	1	2	6	1	3	3	0	0	2	4	4	0
LMOSA_10490	18	17	34	25	45	31	9	15	15	2	6	8	2	2	15	3	5	6	3	0	1	2	1	12	3	2	5	10	8	54	5	22	63	14	13	16	38	7	20	8	9	4	5	6	7	6	11	10	7
LMOSA_1050	6	6	3	7	4	3	4	2	5	3	2	4	7	5	6	0	11	2	3	4	4	1	5	9	6	11	4	2	1	0	3	7	3	5	0	4	7	7	4	1	5	3	3	8	4	6	5	5	6
LMOSA_10500	4	1	4	1	5	2	1	1	3	0	0	6	2	0	0	2	0	0	0	0	1	0	0	0	1	2	2	4	1	3	0	1	6	1	2	3	6	1	8	0	0	0	0	1	1	0	0	1	0
LMOSA_10510	1	3	0	5	5	6	1	3	8	1	1	4	2	2	3	0	5	0	1	1	3	1	0	1	0	4	0	13	3	3	1	1	3	2	5	9	10	4	7	7	0	1	1	0	0	1	2	0	4
LMOSA_10520	0	0	0	0	0	1	0	0	0	0	0	0	0	1	0	0	0	0	0	0	0	0	0	0	0	0	0	0	0	0	2	0	0	0	0	0	0	0	0	0	0	0	1	0	0	0	0	1	0
LMOSA_10530	11	6	11	13	17	8	15	7	11	7	8	11	9	6	3	20	20	8	8	2	7	10	10	25	11	23	16	12	8	7	8	18	15	5	4	21	21	10	17	16	13	6	7	14	5	13	3	13	9
LMOSA_10540	10	11	12	24	16	14	8	15	14	12	10	14	12	13	14	5	9	13	7	5	10	4	11	32	13	21	13	20	9	13	4	12	14	4	9	14	18	10	13	17	11	5	21	12	10	7	12	20	8
LMOSA_10550	2	2	0	2	0	1	1	0	3	0	5	0	0	0	3	0	2	1	1	0	1	2	1	2	0	1	2	0	0	0	0	1	1	2	0	0	2	1	0	0	1	1	5	0	1	0	0	2	1
LMOSA_10560	1	4	3	2	4	3	4	9	7	2	5	5	5	4	11	1	10	5	4	4	15	8	13	12	4	26	22	4	3	13	3	7	6	11	4	5	8	5	6	8	16	6	11	16	8	7	5	19	9
LMOSA_10570	79	67	68	87	95	104	119	88	91	89	84	83	125	94	86	9	116	92	64	52	74	63	86	207	77	175	100	81	46	122	45	113	64	61	52	82	129	84	108	126	109	61	83	120	61	68	88	153	102
LMOSA_10580	122	73	103	110	129	85	99	92	99	34	53	62	90	77	97	102	114	54	43	29	61	52	64	167	59	189	71	94	70	136	56	132	126	90	104	143	181	146	166	187	141	114	107	177	101	100	104	206	169
LMOSA_10590	53	31	44	70	76	80	53	43	45	39	50	58	71	34	59	41	73	39	27	13	27	47	45	64	54	120	64	32	37	56	34	62	53	30	55	65	77	88	86	95	41	53	56	69	45	43	43	78	70
LMOSA_1060	73	61	56	76	84	78	63	70	61	56	76	91	96	82	95	91	100	78	48	46	86	67	76	135	59	112	77	62	33	71	40	65	47	48	55	67	93	73	82	113	102	73	72	106	57	61	65	126	80
LMOSA_10600	34	23	23	38	54	61	20	32	37	20	29	25	35	19	36	25	38	27	28	10	30	22	32	50	34	53	49	26	18	26	18	19	21	20	22	40	35	40	32	29	19	16	29	31	18	18	19	44	41
LMOSA_10610	8	8	10	26	32	21	15	12	12	6	7	8	13	2	13	11	21	6	4	3	7	3	11	27	6	43	5	32	7	17	3	17	9	7	9	16	22	14	25	17	6	7	21	15	10	6	2	12	14
LMOSA_10620	13	6	11	11	10	8	6	8	9	4	6	5	7	6	5	5	13	2	3	1	7	5	7	22	5	11	8	7	4	16	3	8	9	6	3	7	10	8	10	9	4	6	8	12	5	3	3	11	7
LMOSA_10630	11	8	26	22	26	32	11	16	26	7	21	20	12	13	15	8	34	13	10	8	6	11	19	37	27	59	17	29	13	18	12	21	10	9	17	30	22	21	21	19	15	13	15	22	15	10	16	22	11
LMOSA_10640	0	0	0	0	0	0	0	1	0	0	0	0	0	0	0	0	1	0	0	0	0	0	0	0	0	0	0	0	0	0	0	0	0	1	0	0	0	0	0	0	1	0	0	0	1	0	0	0	0
LMOSA_10650	44	20	16	28	17	18	50	26	15	13	9	11	24	19	24	16	11	6	5	2	4	9	7	10	5	10	8	40	21	40	34	41	31	26	16	18	35	28	29	23	13	15	25	12	21	10	18	32	28
LMOSA_10660	168	98	89	118	123	92	159	119	117	94	104	79	156	108	149	41	177	138	84	38	94	66	95	190	88	158	107	228	97	153	85	151	104	123	107	183	190	158	160	276	195	133	233	200	114	128	179	248	265
LMOSA_10670	2	0	1	0	0	1	1	2	0	0	0	1	0	0	0	0	3	0	0	0	3	0	1	1	0	0	0	3	0	1	1	0	2	0	0	1	1	2	0	2	0	1	0	6	1	2	2	1	4
LMOSA_10680	4	3	4	4	5	5	2	1	9	4	2	8	7	4	1	2	2	5	4	2	1	0	1	10	2	8	6	2	1	8	2	3	10	2	2	0	0	1	2	4	5	5	3	6	3	3	3	14	5
LMOSA_10690	18	12	9	11	24	11	20	14	21	18	18	19	22	18	19	32	16	11	11	9	14	19	33	47	22	55	19	34	11	20	13	18	11	13	19	28	32	18	30	40	18	20	22	32	16	27	18	31	34
LMOSA_1070	101	61	66	119	162	159	146	146	151	110	130	140	117	127	146	213	194	119	80	55	128	106	111	229	152	220	182	141	83	105	108	121	118	120	102	170	235	182	192	179	143	118	139	184	112	118	111	170	181
LMOSA_10700	1	0	0	0	2	0	0	0	1	0	1	2	1	0	2	2	0	2	1	0	4	1	3	8	3	6	3	1	0	1	0	0	0	1	0	0	0	2	0	0	1	0	3	0	2	0	1	0	0
LMOSA_10710	2	4	4	2	5	5	1	3	2	1	6	14	0	2	8	10	5	4	6	4	29	21	27	74	22	58	23	1	2	3	0	2	2	3	4	2	4	4	5	6	5	5	2	3	2	4	1	7	3
LMOSA_10720	0	3	0	1	1	0	0	0	0	0	1	0	1	0	1	4	1	1	1	0	3	4	11	17	5	13	5	0	0	1	0	1	0	1	0	1	0	0	0	0	1	2	1	2	0	0	0	3	0
LMOSA_10730	1	0	1	0	0	0	0	0	0	0	0	0	0	0	0	2	0	0	0	0	0	0	0	8	1	6	2	0	0	0	0	0	0	2	0	0	0	0	0	1	0	0	0	0	0	0	0	0	1
LMOSA_10740	2	0	0	0	1	1	0	0	0	0	0	1	0	0	0	5	2	0	0	0	2	2	1	13	12	10	5	2	0	0	0	6	0	1	3	0	0	0	1	0	3	1	0	1	3	0	1	1	0
LMOSA_10750	4	0	0	0	0	0	3	1	0	0	2	0	2	2	0	0	0	2	1	0	0	0	0	1	3	3	5	2	1	2	3	0	1	1	0	1	1	1	1	2	1	1	1	3	3	1	0	0	1
LMOSA_10760	1	1	0	0	0	1	0	0	3	1	3	1	1	0	5	4	1	0	0	0	0	1	2	5	1	8	6	3	0	2	0	1	0	0	3	0	2	1	2	3	0	1	0	1	0	1	0	1	1
LMOSA_10770	2	1	1	1	2	4	2	2	1	2	2	3	4	2	6	4	6	5	0	0	2	3	2	4	7	10	5	0	0	2	1	5	1	1	5	3	3	4	4	4	1	5	2	2	2	2	6	4	4
LMOSA_10780	5	2	3	1	6	10	7	9	4	7	10	2	2	7	4	0	5	6	4	4	4	1	4	8	3	3	4	6	2	4	4	5	1	1	2	5	8	5	7	6	6	1	3	4	4	8	7	8	6
LMOSA_10790	10	13	6	15	10	9	13	9	9	13	14	16	10	9	12	50	10	6	8	4	9	2	9	6	11	13	13	16	13	11	9	15	13	10	12	11	16	19	18	14	22	12	19	18	10	9	11	26	10
LMOSA_1080	49	32	34	46	70	54	51	56	71	47	45	51	62	31	61	68	65	40	20	10	28	27	46	74	37	55	29	51	24	50	40	65	50	50	42	54	100	77	67	68	52	58	76	90	43	52	46	114	77
LMOSA_10800	5	1	5	4	8	6	13	10	6	2	4	3	7	3	7	3	10	6	2	2	9	3	8	13	7	22	9	3	4	10	1	11	10	5	2	4	8	4	10	7	16	4	11	8	6	7	11	9	13
LMOSA_10810	10	11	9	7	8	11	19	13	12	14	14	10	19	15	20	26	16	11	15	6	20	13	23	48	13	38	31	12	7	17	8	8	16	9	13	11	20	16	17	28	25	23	31	22	14	21	13	33	26
LMOSA_10820	5110	5888	2626	2927	3783	3098	2049	2955	1916	2229	2146	2505	2360	1651	1710	2879	3008	1770	487	318	874	670	603	736	1217	726	723	754	842	1129	1048	1263	1006	1085	1425	1396	2559	1495	1865	971	1070	894	643	1126	1181	601	699	2319	1378
LMOSA_10830	17	18	17	25	31	32	29	22	32	15	28	33	28	22	38	29	38	26	12	6	18	11	19	32	18	29	12	44	21	38	21	30	34	39	39	48	59	53	48	50	42	32	42	51	34	23	31	50	42
LMOSA_10840	57	29	31	50	68	45	44	34	36	23	43	35	44	34	49	55	47	43	23	19	30	18	28	44	36	45	31	48	24	46	24	36	34	30	27	56	69	49	46	72	25	39	54	47	28	34	20	67	54
LMOSA_10850	40	43	28	24	26	29	45	46	42	40	65	41	51	44	56	61	82	42	46	38	67	34	48	91	58	96	55	43	13	50	14	30	35	38	40	35	76	34	47	69	89	37	40	65	36	33	44	70	44
LMOSA_10860	14	10	11	5	13	15	8	9	14	14	9	8	9	8	11	7	5	12	10	4	15	19	34	78	25	93	29	10	6	30	10	39	32	4	0	7	6	3	13	14	11	28	14	24	25	12	23	60	13
LMOSA_10870	3	2	2	4	3	6	6	5	9	4	3	2	3	1	8	1	4	6	3	2	7	5	17	23	10	26	8	4	2	5	2	5	11	2	1	3	8	2	3	6	1	9	2	6	1	3	3	11	5
LMOSA_10880	15	12	8	17	17	15	21	14	19	11	17	19	17	18	18	7	14	22	25	15	28	25	51	78	25	71	49	16	10	27	14	24	15	17	20	13	25	22	23	18	11	17	20	23	12	15	17	21	15
LMOSA_10890	120	95	49	93	113	103	114	117	111	124	119	142	138	100	217	234	240	239	120	87	157	125	163	223	185	212	197	116	82	148	120	136	96	148	100	114	168	116	156	209	304	121	194	215	146	90	162	221	155
LMOSA_1090	3	2	0	2	5	1	4	4	2	0	2	2	4	4	7	0	4	1	4	0	5	2	3	4	5	6	5	4	3	1	4	6	7	4	0	4	1	3	0	5	6	4	6	2	0	4	1	4	7
LMOSA_10900	50	44	25	32	45	35	45	35	31	37	32	45	53	50	63	68	56	47	40	24	33	35	34	75	62	50	39	32	19	37	23	15	23	19	23	33	43	26	30	36	48	28	33	44	33	27	41	43	46
LMOSA_10910	267	185	128	169	181	171	196	156	140	105	110	100	232	188	302	69	289	214	199	82	210	137	226	476	153	314	190	316	169	285	209	319	224	234	214	327	394	284	413	496	306	274	355	454	244	248	291	450	512
LMOSA_10920	113	45	54	96	87	76	101	62	71	60	72	76	114	110	150	40	182	111	99	37	101	72	136	308	112	191	124	119	57	95	47	102	56	79	54	90	134	112	139	160	79	82	98	168	64	76	109	134	167
LMOSA_10930	48	35	20	31	37	21	52	32	26	37	28	19	35	27	52	59	53	34	20	11	14	12	20	31	23	22	14	60	32	67	25	73	29	27	27	35	57	33	42	60	54	35	43	48	23	52	40	52	67
LMOSA_10940	526	301	365	480	516	480	477	441	389	377	495	275	513	419	1138	6	1196	898	536	396	524	629	819	926	815	957	696	1088	640	964	530	1119	536	976	507	826	1221	796	730	819	735	435	772	656	436	816	676	839	1165
LMOSA_10950	11496	5632	5093	8614	8444	7560	11179	7982	6614	7558	7299	7231	9824	7601	17129	61	17763	12184	6438	4303	6414	6198	8988	10413	9312	9263	6428	20586	11263	14240	9655	18150	9412	9594	6002	9793	10344	8530	7750	5597	3713	2624	5005	5540	3341	7944	6751	8455	13349
LMOSA_10960	37	12	16	23	24	15	19	13	20	16	16	7	41	34	87	0	91	62	34	18	31	30	44	54	35	47	31	40	22	22	19	24	13	39	17	56	44	41	42	67	39	32	59	58	37	88	68	80	110
LMOSA_10970	71	65	45	59	97	59	89	71	70	85	97	78	116	113	257	1	293	152	130	79	122	121	123	148	128	160	102	163	101	135	93	124	79	148	93	160	152	119	122	200	220	142	180	201	119	221	213	219	263
LMOSA_10980	19	9	10	15	9	12	22	15	10	16	11	9	28	30	80	0	51	53	28	19	19	19	32	41	25	31	18	30	8	21	11	25	7	31	7	30	22	26	19	48	25	22	31	50	34	42	29	49	84
LMOSA_10990	1	0	0	0	0	0	1	0	0	0	0	0	1	1	3	0	1	0	0	0	2	1	0	0	2	0	0	0	0	0	0	0	0	0	0	0	0	2	0	3	4	0	0	0	0	0	0	0	2
LMOSA_1100	38	20	26	26	38	22	10	11	17	15	13	13	20	18	43	72	34	17	15	9	18	16	16	42	7	33	17	46	16	18	24	32	33	29	25	35	59	37	43	144	102	90	99	130	68	65	76	109	103
LMOSA_11000	2	0	0	0	0	0	0	2	0	2	0	0	0	1	0	1	1	2	2	0	0	0	0	0	5	1	0	0	0	0	0	1	1	3	1	0	2	0	0	0	0	0	0	3	1	1	2	5	1
LMOSA_11010	11	10	8	6	6	10	8	8	6	11	3	7	21	6	6	24	16	13	10	3	9	6	4	8	9	9	9	3	1	4	0	6	4	6	4	7	7	7	9	7	5	4	6	13	7	5	5	18	11
LMOSA_11020	24	9	13	9	12	17	10	8	12	11	18	16	11	9	22	41	21	15	13	11	13	12	17	43	15	25	15	20	11	15	12	25	17	22	13	17	17	19	28	25	26	13	10	22	5	20	15	32	23
LMOSA_11030	687	420	353	521	546	422	840	568	433	554	609	372	720	555	827	496	877	771	438	276	358	395	662	1076	662	776	636	1132	558	920	553	967	577	758	517	853	1080	731	829	933	763	425	653	801	417	556	722	856	926
LMOSA_11040	530	340	281	364	446	363	714	523	462	408	440	409	480	376	576	444	592	412	196	104	183	179	223	235	221	234	137	674	381	619	413	683	442	388	284	397	437	409	494	590	405	315	379	490	345	332	384	513	598
LMOSA_11050	14	11	12	14	10	12	18	6	4	9	11	8	10	16	18	5	17	13	9	0	6	6	6	9	2	6	7	5	8	15	7	10	10	10	8	8	12	10	16	27	9	17	17	22	15	10	14	25	14
LMOSA_11060	24	16	8	15	17	16	18	22	27	8	14	18	14	23	12	4	30	13	14	4	20	9	12	27	14	17	8	6	5	17	19	24	10	8	9	15	33	19	9	19	21	9	11	17	15	19	12	32	14
LMOSA_11070	14	11	8	10	18	14	29	19	14	14	24	17	15	15	16	10	24	12	7	11	17	17	22	32	17	38	13	45	12	12	7	29	14	19	10	20	30	24	33	25	17	13	22	23	16	12	11	22	18
LMOSA_11080	8	11	11	12	9	6	11	14	18	8	12	9	11	12	11	11	17	11	7	5	6	10	18	20	12	29	11	20	15	25	10	23	15	15	9	10	24	14	24	29	13	10	17	25	11	19	12	18	20
LMOSA_11090	9	15	6	5	14	7	14	17	13	8	20	8	10	17	19	7	14	12	10	5	15	24	10	18	14	29	24	8	6	10	17	14	16	13	14	11	20	18	21	22	15	12	13	28	24	16	17	29	29
LMOSA_1110	6	6	2	7	5	8	4	8	4	0	2	5	5	4	7	76	19	9	3	3	6	3	5	18	5	9	7	18	7	11	7	12	5	10	2	14	15	15	16	48	38	20	38	33	27	10	21	42	33
LMOSA_11100	34	13	37	15	24	20	17	26	38	7	18	22	7	8	15	76	15	8	12	9	29	15	21	63	25	83	43	22	22	74	20	94	56	16	19	14	47	21	24	74	60	59	32	64	58	14	33	86	23
LMOSA_11110	25	23	28	23	34	28	32	29	43	38	33	57	31	21	26	78	35	28	28	12	41	26	27	55	17	41	48	19	5	34	11	31	23	17	15	12	19	11	21	30	27	22	16	37	29	22	25	49	27
LMOSA_11120	27	23	19	17	24	24	29	38	32	14	20	33	29	16	42	59	34	23	28	18	51	9	24	70	11	36	32	39	19	38	17	40	42	32	26	30	64	49	51	84	64	70	67	74	32	34	39	78	70
LMOSA_11130	168	98	88	125	148	130	176	136	128	106	153	172	132	91	172	232	252	112	113	42	144	87	132	232	116	185	130	253	154	144	105	210	152	170	140	169	241	200	244	286	212	170	235	297	159	118	167	245	195
LMOSA_11140	16	7	13	6	12	8	12	10	11	5	12	9	13	7	20	19	25	6	9	6	19	11	14	21	9	20	7	16	4	14	7	19	16	7	9	9	21	13	11	24	14	28	17	29	15	14	11	38	18
LMOSA_11150	8	4	8	9	17	9	15	11	11	14	12	20	15	10	14	6	28	15	11	5	19	9	24	18	23	30	7	7	4	14	9	14	13	11	13	28	27	23	14	21	10	9	11	22	13	8	14	27	16
LMOSA_11160	69	18	24	53	68	42	75	78	51	55	64	68	94	73	75	44	97	52	52	24	59	42	92	81	46	97	70	46	38	75	33	50	50	45	38	46	55	42	79	123	81	79	88	113	52	71	52	92	123
LMOSA_11170	19	38	39	48	74	88	17	23	30	21	40	27	28	22	30	11	17	37	2	3	1	2	1	1	5	2	0	5	1	10	3	12	11	33	18	42	40	26	28	46	60	22	23	26	27	25	19	18	39
LMOSA_11180	11	16	11	50	69	57	17	14	17	10	23	22	22	16	30	0	31	31	0	1	0	0	3	1	4	3	0	5	4	15	0	31	7	27	16	53	60	26	27	29	37	14	34	29	29	25	16	10	31
LMOSA_11190	38	23	27	44	52	41	14	19	30	6	25	25	12	11	14	1	19	11	3	4	12	4	11	14	12	21	6	16	5	15	13	25	31	32	30	55	59	45	47	40	26	21	23	40	16	16	20	32	21
LMOSA_1120	3	3	2	2	3	3	1	8	2	1	5	3	5	7	8	47	8	4	2	1	7	5	7	5	2	3	0	6	3	2	4	4	9	4	4	12	4	4	10	26	17	22	25	27	20	12	16	35	28
LMOSA_11200	6	3	6	5	14	20	7	3	4	2	3	8	5	3	4	2	3	4	3	0	5	4	3	5	3	7	3	4	2	4	3	7	10	9	4	9	10	7	8	7	5	4	4	5	4	3	2	8	5
LMOSA_11210	6	5	10	2	15	10	5	6	9	2	4	2	1	2	5	5	8	3	3	2	4	2	3	4	5	4	3	7	1	5	1	7	2	10	6	13	5	6	9	8	6	9	9	9	4	0	2	9	6
LMOSA_11220	41	20	32	34	58	52	22	24	28	25	37	34	18	20	37	19	26	23	15	4	15	21	25	43	27	53	34	28	19	39	23	30	29	22	29	46	46	39	70	40	17	23	27	34	29	10	15	48	29
LMOSA_11230	30	24	47	45	54	65	34	43	49	15	46	29	28	21	24	52	45	29	17	12	23	19	41	78	41	86	57	30	16	31	12	24	32	17	19	29	48	31	46	52	32	20	45	31	22	24	29	54	29
LMOSA_11270	46	30	25	15	31	35	47	58	55	50	67	54	37	29	24	51	77	46	44	35	54	28	25	49	40	58	37	45	23	67	33	49	50	41	23	44	72	53	52	38	57	24	44	35	19	32	25	55	39
LMOSA_11280	93	32	42	46	52	40	95	74	69	63	83	85	69	67	71	59	84	59	80	37	80	59	94	81	64	128	69	108	80	88	67	74	77	70	82	84	133	97	93	70	45	40	50	75	38	68	46	98	85
LMOSA_11290	128	85	82	70	102	93	191	139	147	113	121	165	127	86	125	115	185	98	116	90	142	80	99	145	87	194	94	210	128	178	132	139	142	197	133	206	258	196	203	128	96	82	104	110	63	81	71	96	110
LMOSA_1130	5	1	2	1	6	6	3	2	0	2	1	1	12	3	5	67	6	1	5	0	1	0	2	7	0	3	3	8	4	4	1	4	4	4	7	4	13	12	19	61	42	18	42	44	25	12	18	44	41
LMOSA_11300	452	236	293	343	386	386	717	505	459	445	519	578	384	282	432	169	683	263	300	208	425	321	435	693	408	635	318	791	454	553	416	704	465	486	473	638	770	653	708	403	267	215	352	414	256	263	270	423	391
LMOSA_11310	28	18	12	16	24	15	30	23	19	17	28	30	17	17	24	25	19	12	15	11	25	14	22	38	27	55	23	25	20	26	18	28	21	20	24	28	33	31	22	24	21	14	22	17	11	13	10	27	16
LMOSA_11320	59	35	36	43	40	51	80	50	73	57	56	84	67	67	68	94	138	67	67	34	79	65	78	173	88	202	148	101	48	87	48	74	74	60	52	76	115	86	103	121	116	62	90	110	54	67	67	113	93
LMOSA_11330	41	29	25	34	41	32	42	51	37	32	33	37	43	40	56	27	61	29	31	27	31	40	50	51	41	104	82	52	29	51	24	44	40	36	31	56	44	51	53	87	79	45	73	67	39	47	48	63	50
LMOSA_11340	34	13	19	23	27	32	44	34	30	16	40	23	28	18	25	38	33	18	20	4	29	33	33	84	35	72	49	34	20	35	26	37	40	35	41	38	64	27	46	64	51	28	42	57	36	24	32	61	67
LMOSA_11350	56	41	34	54	51	55	63	85	40	47	63	58	42	30	60	77	79	49	38	20	47	44	59	136	87	161	102	71	41	62	45	85	68	53	45	66	93	64	88	104	100	73	84	116	44	41	74	111	85
LMOSA_11360	2	2	0	3	2	1	0	2	3	4	1	3	3	3	1	8	5	0	2	2	3	4	2	6	3	3	3	5	0	1	2	2	3	0	0	0	0	5	2	2	1	0	2	4	2	2	2	2	1
LMOSA_11370	10	5	0	6	10	6	7	10	4	3	4	13	8	8	8	9	17	7	22	6	15	8	11	18	8	36	14	12	12	7	7	11	11	10	4	13	18	10	14	15	8	4	3	7	4	8	4	9	6
LMOSA_11380	4	2	3	3	5	5	8	1	6	4	6	6	0	0	4	3	6	5	1	0	5	4	2	5	2	16	8	7	6	5	5	2	5	3	0	4	4	5	2	7	2	1	7	8	2	6	1	3	3
LMOSA_11390	8	5	2	5	4	6	6	4	6	5	4	4	4	5	6	0	8	8	7	6	6	7	12	4	7	24	10	13	5	5	11	12	9	10	9	2	14	9	10	9	5	8	17	8	3	8	4	10	8
LMOSA_1140	49	24	20	24	24	22	10	16	15	12	19	20	43	47	69	706	74	47	45	34	50	27	53	97	25	59	65	50	20	42	18	48	41	51	54	65	91	53	91	350	362	203	299	357	193	241	261	359	262
LMOSA_11400	6	6	2	5	3	3	7	4	4	3	10	8	5	5	4	2	11	3	5	9	3	5	5	12	6	23	6	16	10	10	7	7	7	7	6	9	7	4	6	11	4	6	6	6	6	5	5	6	8
LMOSA_11410	7	6	5	2	1	2	5	3	4	2	4	0	3	6	5	12	6	2	2	1	5	8	7	19	4	15	11	7	2	4	3	2	3	3	4	7	7	4	6	9	4	4	7	12	6	4	4	11	9
LMOSA_11420	9	14	4	8	6	9	14	10	8	10	2	8	8	5	5	11	8	5	3	1	2	2	1	8	1	4	2	2	2	3	0	17	1	4	3	6	12	3	8	3	4	10	7	8	3	4	6	13	10
LMOSA_11430	10	9	12	5	12	9	8	18	8	10	15	20	15	9	15	26	16	11	3	1	12	3	6	16	5	9	12	4	3	17	2	13	6	3	5	3	10	14	8	11	10	16	2	9	10	3	9	24	8
LMOSA_11440	1	2	1	1	3	2	1	0	3	2	2	1	0	1	2	0	0	0	2	3	0	1	0	1	0	2	3	4	0	7	0	3	2	5	2	2	0	2	3	3	4	0	6	6	2	1	3	4	0
LMOSA_11450	27	15	30	31	36	47	30	35	37	16	27	36	24	15	26	103	23	21	16	8	25	17	20	32	34	42	22	26	14	29	13	28	41	20	21	34	40	29	31	27	22	20	18	31	32	18	22	66	22
LMOSA_11460	26	14	24	20	28	28	29	37	31	24	30	29	31	13	24	69	42	12	7	9	18	8	19	47	20	36	15	33	16	26	11	22	29	24	15	26	31	19	44	30	8	15	10	22	19	11	8	28	24
LMOSA_11470	19	6	19	12	24	15	27	5	13	10	15	23	22	8	12	47	26	9	4	6	11	5	19	17	21	22	13	23	6	24	9	21	8	13	14	18	15	17	20	27	12	9	17	29	12	13	17	27	25
LMOSA_11480	7	2	5	1	6	6	14	4	2	8	2	4	4	2	5	27	11	4	1	2	0	0	3	3	6	4	1	10	5	3	0	1	1	1	3	5	0	5	1	5	4	0	1	4	2	3	1	6	4
LMOSA_11490	8	4	3	6	7	3	3	8	5	5	9	6	11	1	8	20	10	6	4	2	12	5	6	18	19	9	14	2	0	13	6	8	5	9	3	7	10	4	7	5	5	6	7	9	9	4	1	11	7
LMOSA_1150	4	3	6	3	9	3	6	2	4	2	6	3	2	1	4	11	7	3	0	3	2	3	3	2	2	8	6	9	7	1	2	5	8	4	4	8	11	6	8	32	27	17	16	23	12	11	16	17	25
LMOSA_11500	22	2	9	9	9	9	3	7	11	9	14	8	12	4	18	6	25	11	7	7	12	8	14	28	22	36	15	9	7	15	8	23	4	18	8	25	19	16	11	20	12	5	25	22	19	12	15	30	22
LMOSA_11510	5	7	6	7	10	16	19	17	6	17	8	17	23	19	21	29	23	16	12	7	20	10	14	36	14	22	19	8	2	12	6	24	7	14	19	5	24	4	20	23	21	15	16	30	18	22	16	31	29
LMOSA_11520	0	3	0	0	1	0	1	2	1	1	1	0	5	2	4	1	1	2	5	1	1	2	2	3	0	0	1	0	0	1	0	0	3	1	1	3	2	1	1	6	10	1	3	3	6	3	1	4	4
LMOSA_11530	0	1	0	1	0	0	1	0	0	1	0	0	1	2	0	1	2	0	2	0	0	1	0	0	0	0	1	0	0	0	1	2	0	2	3	1	1	1	2	6	3	2	0	1	1	1	0	3	4
LMOSA_11540	0	0	0	1	0	0	2	0	1	1	0	0	0	1	2	3	1	1	0	0	7	1	0	1	1	1	1	0	0	1	0	1	0	1	0	0	1	1	0	3	2	3	1	2	0	5	0	1	2
LMOSA_11550	2	0	0	3	1	4	4	4	2	2	1	0	3	2	2	1	4	6	0	0	5	4	2	5	4	2	2	3	3	8	0	3	2	3	5	6	2	2	4	3	10	4	3	10	3	3	6	5	9
LMOSA_11560	1	0	1	1	0	2	2	0	1	0	0	1	2	0	2	2	1	2	0	0	0	3	0	0	1	8	3	1	0	2	0	8	0	0	1	6	4	0	1	2	0	1	3	2	0	2	1	3	3
LMOSA_11570	225	146	156	247	256	253	375	285	227	229	207	277	297	267	314	287	482	197	184	118	261	181	391	572	391	672	310	412	253	356	239	403	259	295	233	365	363	340	381	422	216	265	428	415	231	235	311	522	391
LMOSA_11580	185	118	116	217	222	217	280	218	199	210	176	169	192	133	228	286	300	154	126	79	182	159	229	407	348	492	177	442	216	270	193	315	221	250	174	289	304	330	400	471	193	244	367	410	202	201	233	395	338
LMOSA_11590	3	3	1	10	10	6	9	10	4	5	11	5	5	7	12	3	19	8	2	3	7	7	10	19	7	18	6	12	5	10	6	15	10	10	4	11	14	7	10	19	19	14	9	17	11	12	18	24	15
LMOSA_1160	7	3	2	0	7	2	5	4	7	2	0	1	3	5	2	2	6	2	1	2	2	1	3	5	1	2	5	7	4	10	0	3	5	6	9	4	4	3	9	3	7	2	4	7	0	2	5	13	11
LMOSA_11600	131	65	49	81	82	69	114	78	93	66	85	79	132	96	161	35	196	116	80	57	102	85	122	143	118	170	103	192	55	112	90	96	97	110	80	118	178	146	141	184	132	100	142	176	110	135	124	185	196
LMOSA_11610	0	0	0	0	2	0	0	0	0	1	0	0	1	1	0	0	0	0	0	0	1	0	0	0	0	0	0	0	0	0	0	0	0	0	0	0	1	0	0	1	2	0	0	1	1	0	0	1	0
LMOSA_11620	0	0	0	0	0	0	0	0	1	0	0	0	0	0	0	0	0	0	0	1	0	0	0	0	1	0	0	0	0	0	1	0	1	1	2	0	0	0	0	1	0	0	2	0	1	0	0	1	0
LMOSA_11630	0	0	0	1	2	0	0	0	0	0	0	0	0	0	1	0	0	0	0	0	0	0	2	0	0	2	0	0	0	0	1	4	0	0	0	0	1	0	1	1	0	0	2	1	0	0	0	0	0
LMOSA_11631	0	1	0	0	0	0	0	0	0	0	0	0	0	1	0	0	0	0	0	0	0	0	0	0	0	0	0	0	0	0	0	0	0	0	0	0	0	0	0	0	0	0	0	0	1	0	0	0	0
LMOSA_11640	0	0	0	0	0	0	0	0	0	0	0	0	0	0	0	0	0	0	0	0	0	0	0	0	0	0	0	0	0	0	0	0	0	0	0	0	0	0	0	0	0	0	0	0	0	0	0	0	0
LMOSA_11650	416	231	274	282	324	234	531	327	302	284	355	241	499	376	681	49	904	486	331	219	322	302	458	499	436	595	458	723	321	448	301	522	321	458	306	620	641	552	534	886	522	386	711	718	397	594	695	777	925
LMOSA_11660	175	93	96	125	118	91	168	157	130	126	136	118	261	228	324	19	451	221	155	112	184	133	214	243	181	281	154	287	187	190	170	280	161	196	143	345	307	285	257	513	318	348	515	533	348	395	409	547	502
LMOSA_11670	14	7	5	3	7	14	9	13	10	10	9	3	14	13	13	1	18	10	5	3	9	9	13	31	15	19	15	14	4	8	7	17	7	11	6	18	13	17	25	24	18	10	21	24	9	14	6	18	23
LMOSA_11680	786	532	496	520	684	409	928	674	527	647	615	458	777	513	849	1348	950	656	373	245	275	385	305	385	375	295	345	1194	643	1030	705	1107	582	703	560	644	1026	575	639	550	491	328	429	499	428	446	533	678	750
LMOSA_11690	53	26	19	21	26	28	28	28	28	17	23	15	48	29	44	14	82	24	14	15	27	20	19	24	10	19	10	68	35	51	23	66	51	65	24	70	89	59	59	73	88	57	105	82	51	44	65	82	73
LMOSA_1170	6	2	3	3	6	5	1	6	8	4	0	9	9	3	3	1	5	4	2	0	3	2	6	3	2	4	5	1	1	11	4	4	8	3	1	3	5	2	3	3	4	1	1	4	3	3	2	2	1
LMOSA_11700	73	45	61	73	75	73	103	58	66	76	61	63	102	75	96	18	227	71	66	40	117	58	74	144	78	130	61	142	83	114	59	157	92	86	76	162	172	119	138	152	104	112	172	185	90	128	153	147	130
LMOSA_11710	78	58	52	74	117	82	107	55	68	59	63	99	92	80	86	30	166	86	83	59	86	83	87	133	76	141	90	105	93	79	75	105	89	97	57	113	126	90	79	110	104	84	125	130	103	111	81	122	124
LMOSA_11720	6	7	2	5	2	5	4	4	2	2	4	3	7	3	6	10	7	3	4	3	7	4	5	13	9	14	3	8	4	7	1	8	6	6	1	10	8	10	9	12	6	8	8	12	12	10	8	6	9
LMOSA_11730	0	0	0	0	0	1	0	3	1	0	1	0	0	0	1	0	4	1	0	0	0	1	0	1	0	0	0	1	0	0	0	0	0	0	0	0	1	0	2	1	0	0	2	2	0	1	1	2	0
LMOSA_11740	13	12	9	16	10	12	17	9	9	17	10	20	20	14	20	8	29	8	14	6	19	9	19	43	19	29	17	23	13	22	7	28	16	13	16	23	30	22	18	18	13	10	16	24	13	28	23	27	29
LMOSA_11750	36	10	14	35	41	32	41	31	20	19	29	37	50	25	45	40	54	33	28	20	48	34	38	60	34	67	20	64	30	41	17	51	27	29	22	42	60	36	41	44	26	39	59	54	34	26	38	71	52
LMOSA_11760	15	14	24	11	14	23	12	19	17	8	16	28	15	7	10	17	14	6	10	6	5	9	10	31	19	31	19	11	0	25	4	26	17	7	13	11	18	10	13	21	19	12	8	18	7	7	10	31	9
LMOSA_11770	17	8	8	19	11	15	18	17	15	13	16	21	20	20	29	38	33	14	21	17	15	18	15	28	17	28	29	21	11	26	10	30	24	15	16	31	37	21	22	37	34	18	30	31	23	14	25	28	22
LMOSA_11780	214	198	54	117	139	111	172	192	123	213	128	125	121	67	134	34	130	115	42	27	51	44	49	84	104	45	50	84	61	95	52	126	39	81	61	69	117	65	58	44	40	20	34	34	41	29	39	74	67
LMOSA_11790	63	29	46	42	69	57	38	39	47	39	51	53	52	43	73	39	103	50	42	31	53	33	48	85	77	88	86	56	26	36	38	50	46	55	34	72	80	64	78	115	87	73	65	114	51	68	86	92	104
LMOSA_1180	0	4	1	1	0	1	0	0	0	1	0	0	0	0	0	2	0	0	0	0	1	1	4	1	3	1	0	1	2	4	3	1	1	0	3	1	7	1	2	3	10	7	11	2	14	2	2	23	15
LMOSA_11800	25	22	34	39	40	31	39	29	29	14	20	36	39	35	36	32	45	28	19	19	26	21	36	21	25	52	22	34	15	34	25	45	33	34	19	50	42	34	43	71	29	35	51	41	40	37	39	65	58
LMOSA_11810	3	0	1	1	2	1	0	3	2	2	4	2	1	0	3	4	2	1	3	1	5	3	5	13	0	2	2	3	0	6	4	2	1	1	0	1	0	0	2	6	2	2	3	4	3	5	0	2	4
LMOSA_11820	47	25	20	28	31	43	67	56	68	42	49	46	42	45	42	142	63	46	43	34	57	55	91	184	61	140	85	30	16	46	14	35	35	22	21	28	50	43	51	60	53	43	58	65	27	38	45	86	59
LMOSA_11830	64	30	36	27	36	57	48	57	47	47	51	43	95	78	124	75	125	94	81	49	78	71	114	173	98	155	91	58	23	58	29	59	49	70	58	116	101	95	105	198	118	82	180	179	106	102	145	193	183
LMOSA_11840	3	3	2	0	3	5	3	3	5	3	4	0	2	6	3	2	0	5	3	0	5	2	8	17	6	8	8	2	2	7	1	4	2	4	3	7	1	6	3	5	1	1	8	6	3	3	10	5	13
LMOSA_11850	8	9	5	1	8	2	10	7	6	11	11	12	4	9	6	9	6	10	4	2	11	8	6	12	13	7	6	8	2	6	1	12	8	5	4	6	12	4	13	5	3	6	6	11	10	5	8	10	11
LMOSA_11860	2	2	2	4	3	3	5	4	6	4	4	6	4	3	5	0	4	6	2	3	2	0	2	11	3	13	9	2	0	0	3	7	2	2	0	5	4	1	2	2	8	3	8	3	1	1	3	5	5
LMOSA_11870	7	2	4	1	7	1	3	5	5	5	3	3	8	4	4	4	4	1	0	0	0	1	1	2	3	12	5	4	0	3	1	4	7	2	3	1	3	6	6	1	6	0	4	4	2	4	4	1	2
LMOSA_11880	1	4	0	7	1	3	3	6	5	6	2	8	3	4	3	3	13	1	0	0	3	3	3	6	3	12	8	4	4	2	3	5	4	0	3	2	1	4	5	5	1	2	2	4	2	1	3	9	3
LMOSA_11890	5	7	4	12	8	9	12	8	7	2	11	12	5	3	5	4	9	2	4	1	4	4	6	9	4	24	5	10	1	7	3	5	10	2	2	5	6	3	11	8	10	6	8	5	4	7	6	10	7
LMOSA_1190	73	32	40	40	44	36	78	48	40	49	49	50	71	46	68	12	106	40	25	24	35	24	46	92	74	57	50	100	59	64	64	114	55	55	46	75	102	61	66	86	63	30	40	73	25	36	46	70	80
LMOSA_11900	0	0	0	0	0	0	1	1	0	1	2	1	0	0	0	1	0	0	0	0	1	0	0	0	1	0	1	0	0	1	1	1	0	0	0	0	0	2	0	0	0	0	0	0	1	0	0	1	0
LMOSA_11910	383	259	334	459	586	482	339	365	281	223	345	311	402	275	335	211	616	368	120	82	224	184	248	425	339	401	243	389	225	451	224	415	338	265	333	403	494	391	599	604	436	314	388	515	303	246	376	485	481
LMOSA_11920	46	21	48	42	65	49	26	45	26	15	29	27	36	14	26	12	41	22	16	8	9	13	15	28	23	36	17	40	24	49	9	27	31	24	30	36	50	46	66	52	34	18	26	42	19	26	16	50	44
LMOSA_11930	22	15	21	30	26	26	21	35	17	16	21	26	15	11	17	20	27	12	5	3	11	6	20	25	8	26	12	33	16	28	9	39	25	21	15	35	26	41	29	21	21	14	24	22	10	13	11	29	17
LMOSA_11940	16	19	21	21	21	27	26	17	22	13	28	20	18	12	17	17	22	12	9	3	14	9	13	12	9	27	12	14	21	20	15	16	15	14	11	17	34	31	24	28	16	15	8	17	5	15	16	18	15
LMOSA_11950	67	51	52	45	54	48	82	80	72	42	62	50	76	73	100	116	113	74	47	38	51	39	30	61	25	53	43	116	62	100	64	120	81	101	89	109	166	96	108	239	201	168	201	207	149	146	134	240	219
LMOSA_11960	770	549	477	656	756	653	610	534	523	468	524	579	746	563	799	828	1339	625	378	289	550	432	541	800	684	838	496	966	604	955	531	1121	729	691	675	974	1182	976	1061	1332	865	926	1041	1363	957	912	1062	1517	1388
LMOSA_11970	0	0	0	0	1	0	0	0	1	0	0	0	0	0	0	0	0	0	0	1	0	0	0	0	0	0	0	0	0	0	0	0	0	0	0	0	0	0	0	0	0	0	0	0	0	1	0	0	0
LMOSA_11980	1	1	1	0	2	2	4	2	1	1	4	3	3	4	4	3	2	2	3	3	2	1	2	3	2	5	4	2	0	3	1	2	2	0	2	4	2	2	5	10	4	4	9	5	5	6	9	9	4
LMOSA_11990	2	0	3	0	2	1	0	0	5	1	1	2	3	1	2	12	7	3	3	0	10	3	6	11	6	10	4	0	2	4	2	1	1	2	0	6	3	1	2	0	8	0	0	1	2	2	1	5	10
LMOSA_120	2	0	2	2	0	0	5	3	1	2	0	2	1	0	2	0	1	3	2	1	2	1	0	3	0	2	2	0	0	1	2	1	0	1	3	4	3	3	2	3	3	0	1	2	0	2	1	6	0
LMOSA_1200	0	0	0	3	0	1	0	1	0	0	0	0	0	1	0	0	0	0	0	0	0	0	0	0	0	0	1	0	0	0	0	3	0	0	0	0	0	0	1	0	0	0	0	1	1	0	0	0	0
LMOSA_12000	9	1	1	2	1	2	1	1	1	1	2	3	2	0	5	0	10	4	1	1	4	2	0	11	0	7	5	2	2	3	1	1	3	6	1	5	3	2	3	9	6	6	2	3	8	5	2	6	5
LMOSA_12010	5	2	1	7	11	3	5	4	2	6	3	5	3	7	10	4	7	4	5	4	2	2	5	7	0	4	3	4	4	4	4	4	0	6	5	7	3	7	4	11	2	2	12	14	5	10	9	7	11
LMOSA_12020	30	21	22	20	40	24	46	38	33	23	33	21	60	45	68	8	96	51	25	12	28	25	44	56	41	68	64	93	33	53	25	59	42	52	24	59	90	58	70	47	36	30	48	47	29	41	40	45	50
LMOSA_12030	14	4	5	8	13	11	13	15	8	6	14	14	18	11	34	2	39	15	6	5	3	9	8	15	14	9	7	25	16	19	6	15	8	13	17	18	23	23	20	20	6	18	8	20	15	13	8	21	21
LMOSA_12040	2	0	3	2	2	0	2	0	3	1	1	0	1	3	4	1	3	0	0	1	0	2	1	0	5	4	1	5	3	2	1	1	0	5	2	3	3	2	2	5	0	0	1	1	3	1	4	4	2
LMOSA_12050	10	3	6	10	9	8	12	7	16	8	5	7	13	8	27	6	60	10	6	8	3	3	9	11	7	5	1	22	5	12	3	4	8	11	6	18	27	19	25	22	8	11	13	12	13	10	6	12	12
LMOSA_12060	3	0	0	0	0	2	4	3	1	1	0	0	2	2	3	2	7	1	0	0	0	1	0	1	0	0	0	1	2	1	0	3	0	1	0	4	2	5	1	2	0	1	2	1	1	3	1	0	2
LMOSA_12070	31	21	18	26	28	37	35	51	21	22	27	21	40	32	44	0	40	30	40	11	50	26	36	66	29	60	45	47	32	37	27	45	24	37	45	51	68	39	74	79	89	58	62	59	57	41	47	70	93
LMOSA_12080	27	22	12	24	22	19	37	38	16	28	35	21	36	24	39	0	59	29	28	18	22	12	27	38	9	36	14	38	25	35	22	28	30	27	17	20	49	22	29	50	62	22	26	45	31	17	25	42	37
LMOSA_12090	59	40	22	22	43	36	50	48	44	32	37	37	38	37	61	2	69	50	39	14	34	38	32	52	34	53	65	49	38	36	32	48	43	58	26	38	80	49	70	159	168	80	95	118	59	54	59	96	84
LMOSA_1210	99	62	46	52	75	51	85	69	55	92	40	55	96	51	119	94	73	72	47	18	33	40	34	52	54	27	31	71	35	80	45	67	41	64	43	62	106	55	51	54	39	28	49	62	52	43	60	79	69
LMOSA_12100	6	9	5	10	10	9	10	9	4	5	3	4	4	3	11	6	5	5	4	0	6	5	1	3	1	5	0	13	2	8	6	25	6	10	8	7	20	16	9	25	30	31	26	37	11	12	8	27	21
LMOSA_12110	15	21	9	9	8	7	8	10	10	12	6	7	11	8	22	27	15	8	5	6	13	2	9	21	5	9	8	28	8	18	8	13	7	19	9	25	32	23	26	57	38	39	42	56	26	22	24	38	46
LMOSA_12120	3	0	1	0	0	0	1	0	0	1	1	0	0	0	0	0	1	0	0	0	0	0	0	0	0	2	0	1	0	1	0	0	0	0	0	1	2	0	1	3	1	0	2	5	2	1	0	2	2
LMOSA_12130	3	9	3	2	1	2	4	6	5	5	3	3	2	0	4	11	12	8	1	1	10	4	0	15	6	8	3	5	5	7	4	4	6	3	1	5	8	3	9	12	22	9	18	13	8	5	6	13	13
LMOSA_12140	2	1	1	1	3	4	1	2	6	1	1	2	2	2	4	5	3	2	1	0	2	1	0	0	1	6	7	1	0	5	1	1	2	2	7	0	8	2	0	6	27	10	7	8	8	1	4	2	4
LMOSA_12150	20	13	7	4	11	19	3	8	7	11	8	10	6	6	12	22	19	8	5	5	7	7	9	14	7	3	14	10	9	13	4	15	5	8	13	12	18	11	18	23	22	12	14	21	13	10	20	8	13
LMOSA_12160	23	20	11	27	39	35	39	23	28	22	37	42	44	32	68	29	55	26	38	26	37	30	36	55	47	44	41	40	29	46	24	30	22	39	32	44	70	43	34	54	35	34	47	51	42	37	32	43	49
LMOSA_12170	21	11	17	35	43	29	33	42	35	22	36	22	39	34	50	3	62	38	35	18	30	34	55	47	43	63	30	56	18	53	34	55	30	41	51	52	50	39	36	60	29	44	44	71	52	35	39	60	66
LMOSA_12180	0	0	0	0	0	1	2	1	1	0	1	0	0	0	1	0	1	0	1	0	1	0	2	0	0	0	1	2	0	0	0	0	0	0	0	0	1	2	0	0	2	0	1	3	0	3	1	0	0
LMOSA_12190	2	0	0	1	3	0	2	1	2	1	0	2	1	0	1	0	0	1	2	2	3	0	1	0	0	7	2	3	0	0	0	1	1	0	0	0	2	0	2	4	3	6	0	3	0	1	0	1	0
LMOSA_1220	2	1	0	2	0	3	2	0	2	0	0	2	3	3	1	2	4	4	2	1	2	1	3	0	2	4	3	3	3	7	1	0	0	2	0	1	3	3	3	10	1	3	9	4	6	4	3	5	6
LMOSA_12200	1	0	0	0	2	2	2	1	2	2	1	1	2	1	1	1	3	5	2	1	1	2	0	3	5	5	2	3	0	1	1	2	0	2	1	6	6	2	0	3	3	6	3	5	3	1	2	2	6
LMOSA_12210	0	1	0	0	2	1	1	0	2	2	1	0	1	0	0	1	2	0	0	0	0	2	1	0	0	2	0	2	1	0	3	0	0	0	1	0	0	1	2	1	2	2	1	0	1	0	1	0	2
LMOSA_12220	4	8	6	1	7	1	5	11	1	6	4	5	2	1	10	0	12	7	5	3	7	6	5	16	3	13	8	6	4	7	1	7	1	8	2	10	12	6	8	11	16	7	13	8	5	6	6	8	8
LMOSA_12230	15	9	11	16	20	16	21	8	23	17	20	12	24	18	54	0	28	25	22	12	23	17	24	34	24	35	29	13	13	21	8	22	16	20	16	27	41	29	41	43	64	36	33	43	34	25	36	62	42
LMOSA_12240	20	16	12	8	20	17	17	19	13	17	9	8	32	21	32	0	19	23	14	7	12	9	11	24	3	16	13	13	7	13	16	16	7	19	21	30	35	20	34	44	55	27	48	54	41	27	33	44	55
LMOSA_12250	12	9	6	5	2	8	15	16	10	7	13	14	14	12	22	19	46	16	11	5	17	9	13	15	8	13	8	23	11	14	7	15	12	16	8	17	25	8	29	39	18	10	29	29	18	18	35	31	33
LMOSA_12260	3	0	0	4	3	5	3	2	2	3	1	2	2	0	7	0	11	6	1	2	1	2	3	6	9	4	3	2	0	4	1	1	0	3	3	2	4	6	3	9	8	7	16	16	0	1	1	5	7
LMOSA_12270	31	24	16	21	21	25	41	48	44	29	31	33	39	39	45	58	53	31	21	8	14	8	15	20	12	21	15	35	25	46	32	46	35	25	18	32	40	39	31	81	62	49	83	81	61	43	43	59	70
LMOSA_12280	3	3	4	5	3	3	4	3	4	8	4	6	6	9	7	0	4	5	8	2	13	6	12	16	6	8	16	4	1	10	3	8	6	3	4	7	7	4	6	17	16	6	11	6	13	7	10	23	16
LMOSA_12290	13	9	7	10	8	5	12	11	5	9	5	8	9	17	22	4	26	13	8	13	17	15	11	23	4	22	7	19	6	11	8	16	13	13	14	14	25	29	10	50	35	24	45	44	23	24	35	44	19
LMOSA_1230	1	1	2	4	5	3	2	2	2	3	7	3	1	7	8	2	11	4	2	2	2	3	4	5	4	5	0	2	1	1	1	4	3	6	3	1	8	1	4	20	12	15	17	12	13	17	3	11	11
LMOSA_12300	0	1	0	0	1	0	0	0	0	0	0	0	0	0	0	0	0	0	0	0	2	0	0	1	0	1	0	0	0	0	0	0	0	0	0	1	0	1	0	0	2	0	0	2	1	0	0	0	2
LMOSA_12310	8	6	3	6	6	4	8	7	2	8	2	7	6	8	8	1	4	7	10	6	3	8	11	10	10	7	9	11	5	10	8	9	6	5	3	4	9	5	3	14	9	8	13	12	8	6	3	9	14
LMOSA_12320	0	0	0	0	0	0	0	0	0	1	0	0	0	0	1	0	0	0	0	0	0	0	0	0	1	0	0	0	0	1	0	0	0	0	0	0	0	1	0	0	0	0	0	0	0	0	0	0	0
LMOSA_12330	2	1	0	6	3	0	1	4	2	0	2	1	3	0	1	10	7	0	1	1	0	2	6	8	5	4	4	4	1	4	2	6	0	3	0	4	4	1	4	3	8	7	8	5	2	5	0	6	4
LMOSA_12340	0	0	0	0	0	1	0	0	0	0	0	0	0	0	0	0	0	0	0	0	0	0	0	0	0	0	0	0	0	1	0	0	0	0	0	0	0	0	0	0	0	0	0	0	0	0	0	1	0
LMOSA_12350	14	17	13	12	38	19	8	11	14	7	16	13	4	15	11	4	10	7	7	2	4	15	10	15	8	57	34	8	2	23	7	28	35	10	9	6	22	14	12	18	24	21	18	16	21	14	17	31	10
LMOSA_12360	23	11	17	23	22	20	35	28	19	29	22	21	20	18	56	0	50	23	21	11	51	22	30	61	29	63	26	41	15	32	18	25	9	28	23	40	35	46	45	52	32	24	35	51	20	26	34	49	52
LMOSA_12370	3	2	2	5	8	4	5	2	8	4	3	2	7	4	4	7	5	3	1	0	5	6	4	9	4	8	3	8	3	9	8	8	3	5	6	4	14	8	12	7	7	2	8	8	7	5	2	10	13
LMOSA_12380	2	8	4	9	7	9	3	4	2	5	5	5	9	4	5	1	8	6	3	3	2	1	2	6	5	0	7	9	1	4	3	6	6	5	1	4	4	6	3	2	9	6	7	9	3	5	7	14	7
LMOSA_12390	1	0	0	0	1	0	0	0	1	1	0	0	0	0	0	0	0	1	0	0	0	0	0	0	0	0	0	0	0	0	0	0	0	0	0	0	1	1	0	1	0	2	0	0	0	1	1	1	0
LMOSA_1240	3	2	0	2	2	1	4	1	1	2	3	0	5	1	1	1	3	2	1	1	7	4	2	8	4	6	3	5	0	0	2	1	0	1	1	3	1	4	5	6	4	3	6	12	7	5	4	4	5
LMOSA_12400	0	0	0	1	0	1	0	0	0	0	0	0	0	0	0	0	0	0	0	0	0	0	0	0	0	0	0	0	0	0	0	0	0	0	0	0	0	0	0	0	0	0	0	0	0	0	1	0	0
LMOSA_12410	2	4	0	1	0	1	0	1	1	1	1	1	0	0	1	0	0	0	1	0	0	0	0	0	0	0	0	2	0	0	1	2	3	0	0	1	1	0	1	0	3	0	1	1	0	0	1	0	0
LMOSA_12420	2	1	1	1	1	0	0	0	0	0	0	0	0	1	1	0	1	0	1	0	0	0	0	2	1	0	0	0	0	0	0	0	0	2	1	0	1	1	0	1	2	0	0	0	1	0	0	2	0
LMOSA_12430	3	0	1	1	3	3	2	3	2	0	2	6	3	4	3	10	5	4	2	1	1	1	0	2	7	4	3	4	0	0	2	7	2	2	0	6	5	2	2	4	3	3	4	5	2	2	4	3	3
LMOSA_12440	0	0	1	0	2	1	0	0	0	0	0	1	0	1	0	2	3	0	1	2	0	1	1	1	1	1	1	0	0	0	0	0	0	0	0	1	1	0	0	0	0	0	0	1	0	0	0	3	0
LMOSA_12450	286	230	179	440	379	383	379	314	361	272	292	380	385	369	545	197	858	346	312	238	459	346	536	794	417	1021	252	762	430	459	359	652	482	390	372	538	598	565	623	1360	605	1001	1278	1468	988	667	708	1140	836
LMOSA_12460	131	72	80	135	166	146	143	128	139	94	132	138	140	130	243	198	281	148	147	83	239	120	171	264	116	274	99	249	140	144	143	207	175	150	146	194	208	211	239	544	315	430	568	613	384	257	281	437	334
LMOSA_12470	109	85	45	134	98	99	124	99	108	81	98	97	120	105	195	176	325	137	116	72	180	107	146	225	108	280	105	289	141	148	118	231	163	170	113	170	230	220	199	536	315	413	550	565	354	222	264	447	279
LMOSA_12480	88	43	31	86	65	64	72	80	83	61	84	88	71	86	146	85	236	91	83	54	143	76	109	192	81	198	75	157	103	96	96	156	113	107	58	86	223	119	175	382	273	341	410	368	216	193	158	335	254
LMOSA_12490	122	68	45	94	116	94	124	115	114	85	100	112	118	116	210	91	277	135	125	75	157	103	121	186	96	249	80	246	120	112	80	193	127	115	99	165	186	150	195	470	255	353	515	509	312	229	277	433	294
LMOSA_1250	0	0	0	1	0	1	0	2	0	0	1	2	1	1	3	1	2	1	4	1	1	1	1	2	0	1	1	1	0	0	0	0	1	2	1	0	1	2	0	6	3	5	7	7	2	5	0	4	4
LMOSA_12500	99	69	42	66	98	88	101	76	67	66	80	82	113	102	165	151	257	125	100	58	124	89	160	183	95	198	87	148	74	90	61	138	99	101	88	149	145	138	171	487	262	299	402	490	356	223	228	348	256
LMOSA_12510	135	90	74	123	154	117	144	145	171	105	109	155	162	171	321	311	399	183	185	136	237	170	184	260	135	270	137	295	129	165	132	221	181	192	170	217	296	260	297	925	633	765	879	1005	639	436	443	808	531
LMOSA_12520	22	16	16	21	20	12	23	24	29	24	14	25	30	32	53	73	49	43	32	23	49	21	36	52	18	58	23	31	19	23	21	30	35	34	26	36	50	43	55	185	133	129	177	207	122	85	86	143	104
LMOSA_12530	36	31	26	31	44	38	42	26	45	25	30	33	47	55	105	163	93	79	86	52	101	76	87	118	57	128	75	89	43	62	45	79	72	58	73	90	96	87	96	380	367	314	338	439	302	177	216	309	206
LMOSA_12540	16	8	10	17	17	14	19	13	11	6	4	8	22	12	25	21	23	15	16	12	14	16	18	28	5	23	16	18	15	16	10	19	10	15	6	11	33	19	19	75	48	63	88	97	46	44	45	93	55
LMOSA_12550	9	10	5	3	13	4	11	13	6	17	21	6	6	15	12	12	12	28	23	8	9	12	12	18	13	26	13	20	7	12	11	14	13	9	4	7	15	11	16	42	40	18	33	35	19	22	30	49	30
LMOSA_12560	0	0	0	1	1	1	1	1	0	3	0	1	1	1	2	0	2	2	1	1	2	5	1	1	1	1	0	1	2	0	3	3	0	1	0	0	1	0	4	1	4	3	0	2	1	0	1	2	2
LMOSA_12570	97	38	51	74	55	38	91	52	58	50	43	62	83	63	102	0	113	102	49	38	45	54	85	101	70	88	56	90	38	70	48	111	53	95	46	81	101	93	80	122	104	74	123	95	71	80	98	106	127
LMOSA_12580	18	4	11	12	9	11	12	8	11	8	8	8	23	11	22	19	11	16	16	7	5	19	17	46	17	32	24	12	11	13	9	8	10	13	7	19	13	11	19	55	18	22	23	24	21	17	30	46	37
LMOSA_12590	91	53	48	67	78	77	97	62	72	59	68	74	103	70	107	330	163	74	67	45	94	87	79	142	106	177	84	130	64	119	66	120	63	116	105	192	223	176	198	238	191	137	194	222	128	144	178	221	196
LMOSA_1260	1	1	0	2	0	1	1	1	1	2	0	0	2	1	3	2	3	0	2	1	2	0	1	1	1	0	0	1	0	0	2	1	1	2	2	5	1	1	2	4	6	5	1	3	4	7	1	4	6
LMOSA_12600	13	9	11	4	17	14	18	20	18	12	13	19	22	12	15	19	24	16	19	9	19	13	29	55	17	38	24	23	5	22	7	10	9	14	11	19	28	17	23	29	33	27	32	33	18	15	25	46	19
LMOSA_12610	2	2	0	2	1	1	0	2	0	1	1	0	3	1	2	2	3	1	1	1	1	1	0	0	1	4	1	1	2	0	0	1	0	1	3	2	6	3	3	1	4	2	2	3	1	2	2	6	4
LMOSA_12620	4	3	4	3	1	7	7	5	5	5	8	3	9	12	12	1	13	5	7	2	11	4	8	13	2	15	7	5	3	2	4	2	3	3	8	7	11	6	5	18	12	10	20	23	12	12	13	16	18
LMOSA_12630	11	9	11	15	15	14	7	10	10	11	20	10	8	12	19	12	23	9	8	4	3	8	13	17	12	24	8	10	10	21	6	21	12	7	5	9	17	10	11	13	19	15	18	26	17	13	15	21	27
LMOSA_12640	5	3	4	4	5	4	5	0	3	3	4	5	3	1	3	7	5	4	3	2	0	3	1	8	3	1	8	5	1	0	2	5	0	4	1	3	4	3	7	5	2	5	12	6	6	8	1	7	4
LMOSA_12650	2	3	3	1	2	0	0	4	0	2	0	3	2	3	3	0	5	3	0	2	2	2	5	3	2	3	2	1	2	2	2	1	1	1	1	2	1	0	6	3	6	3	4	3	5	0	3	4	2
LMOSA_12660	5	2	3	4	2	3	3	4	3	1	2	6	3	0	3	0	1	3	1	2	1	2	6	5	4	6	3	0	1	8	3	4	3	4	2	2	5	7	5	3	9	2	2	3	2	4	5	10	4
LMOSA_12670	6	5	2	4	8	6	2	1	4	8	4	4	4	9	1	2	6	2	1	1	5	3	9	10	6	20	4	6	2	9	3	2	1	4	5	10	8	7	6	15	5	7	9	8	4	9	2	12	15
LMOSA_12680	63	33	42	59	45	36	49	50	48	45	42	40	53	56	81	45	116	65	51	30	36	59	76	99	60	108	69	62	34	82	36	70	57	58	48	75	97	81	93	112	63	82	88	85	64	64	70	103	67
LMOSA_12690	19	22	10	13	20	15	12	7	10	14	12	4	21	5	12	16	16	16	15	7	22	12	13	21	11	19	15	16	5	10	10	9	7	12	10	17	18	10	11	20	15	6	10	17	17	15	16	23	25
LMOSA_1270	4	3	0	0	0	2	1	3	1	0	0	2	4	5	6	2	3	2	0	0	0	0	0	4	0	2	0	1	0	2	1	4	0	2	0	2	3	1	1	9	3	6	6	2	2	2	5	4	4
LMOSA_12700	7	7	5	3	5	6	5	4	5	1	4	3	7	4	5	1	14	8	4	2	2	1	0	4	3	6	0	10	1	6	1	6	3	4	0	5	10	7	5	11	8	4	14	14	4	3	6	8	7
LMOSA_12710	0	0	1	1	1	0	0	0	0	0	0	1	4	0	7	0	2	1	1	1	2	1	2	0	0	0	0	1	0	3	1	0	0	2	0	1	2	2	2	2	2	1	1	0	1	1	1	1	0
LMOSA_12720	2	2	1	1	1	1	2	0	3	2	1	0	2	1	4	1	3	1	1	3	2	0	1	0	1	7	1	4	0	4	0	1	1	0	2	1	5	0	4	3	2	0	1	0	0	2	3	0	1
LMOSA_12730	0	0	0	0	0	0	0	0	0	0	0	2	2	0	0	0	1	1	0	0	0	0	2	0	0	0	1	1	0	0	0	0	0	0	0	0	0	0	0	0	1	0	0	0	0	0	0	0	0
LMOSA_12740	6	2	4	3	8	5	5	5	4	7	2	3	10	5	2	13	4	3	2	1	5	1	2	8	0	3	2	3	0	2	0	6	0	3	4	2	2	2	2	3	1	7	2	2	2	0	4	5	6
LMOSA_12750	40	29	24	25	26	25	35	23	25	28	21	24	29	25	43	7	39	40	23	16	39	18	52	89	32	59	34	37	10	31	19	39	19	19	20	25	37	36	35	48	37	22	30	50	35	44	40	74	37
LMOSA_12760	121	88	107	144	185	212	206	139	153	121	128	138	166	177	230	542	259	125	142	64	151	141	191	233	134	263	203	199	176	194	156	197	172	196	198	228	269	246	306	277	234	162	262	350	195	168	219	338	281
LMOSA_12770	3	0	1	1	0	0	3	1	1	1	1	0	0	1	0	0	4	3	0	2	1	3	2	5	4	1	0	1	0	1	1	4	0	4	3	0	4	1	2	2	3	1	1	1	6	3	4	4	2
LMOSA_12780	9	5	5	5	4	3	10	4	12	5	5	4	14	12	21	2	16	5	11	7	17	8	26	12	4	16	4	14	9	8	11	8	7	10	5	15	9	13	10	35	21	10	21	28	16	16	16	33	16
LMOSA_12790	1	1	3	1	3	4	5	2	4	2	3	2	0	4	6	0	8	6	3	4	3	3	5	6	2	10	5	5	2	3	4	1	1	2	4	5	4	7	4	11	7	6	15	18	14	6	4	19	12
LMOSA_1280	6	4	5	3	5	7	9	9	9	6	6	4	8	8	20	18	25	8	13	7	13	8	15	16	13	18	12	11	12	10	7	11	10	6	14	19	15	14	15	37	17	26	41	39	26	29	29	54	37
LMOSA_12800	5	4	2	5	2	1	12	4	2	3	0	5	2	4	3	0	11	3	3	3	6	6	6	11	6	10	4	7	9	6	3	6	4	2	3	5	11	6	7	14	9	12	15	13	10	6	7	14	9
LMOSA_12810	13	12	5	23	22	13	32	11	16	24	24	22	12	17	32	5	75	19	17	15	18	26	33	49	20	62	17	47	25	36	17	27	26	22	19	36	48	29	52	71	26	51	51	70	42	25	26	43	37
LMOSA_12820	2	2	1	2	4	1	3	5	5	4	2	7	4	4	4	5	4	8	2	0	6	5	2	7	7	9	4	3	3	3	1	8	7	2	3	2	5	2	10	5	3	4	4	2	4	2	2	10	3
LMOSA_12830	2	3	2	2	7	2	8	4	4	4	3	6	4	1	4	11	2	4	2	2	4	3	6	5	3	7	7	2	2	2	1	2	1	2	4	1	4	4	3	5	3	3	5	5	3	4	7	6	5
LMOSA_12840	14	5	7	3	8	3	4	6	3	6	6	3	8	3	12	1	7	4	2	4	11	5	8	13	5	9	8	9	7	8	10	11	8	6	4	7	6	16	16	18	15	12	15	15	17	12	5	16	15
LMOSA_12850	3	0	1	0	0	0	0	2	0	0	1	1	0	0	0	2	0	0	1	0	0	0	1	2	0	2	1	0	0	4	0	5	1	1	0	0	0	0	0	2	6	0	2	5	2	2	0	7	1
LMOSA_12860	152	142	99	146	138	159	144	153	159	111	139	134	193	126	208	118	368	180	133	90	87	89	111	126	112	143	135	238	114	290	155	192	149	275	124	245	331	215	249	246	475	109	267	277	129	151	184	206	246
LMOSA_12870	954	594	540	777	921	856	854	649	593	576	602	562	1024	819	1020	1021	1474	809	557	324	565	440	790	1097	667	953	730	1072	631	1002	661	1088	674	886	692	1087	935	970	1148	979	683	540	811	1012	581	733	796	1085	1113
LMOSA_12880	728	740	418	819	1061	883	990	983	849	856	980	958	701	611	708	687	999	687	543	483	474	478	520	587	605	575	790	797	709	957	847	928	638	845	731	699	979	651	743	480	815	369	479	715	582	417	481	660	617
LMOSA_12890	2	2	2	2	3	4	1	1	1	4	1	2	3	4	6	0	5	0	1	5	3	2	3	6	3	7	2	2	2	5	2	6	1	1	1	1	8	3	4	4	4	11	7	8	12	5	4	10	2
LMOSA_1290	18	24	28	17	35	15	46	20	22	28	25	18	33	23	35	18	44	41	21	17	30	20	24	57	38	30	28	52	23	25	22	37	22	30	20	35	47	28	47	76	49	47	84	67	56	43	56	95	53
LMOSA_12900	0	0	0	0	0	0	0	1	0	1	0	0	1	0	1	0	0	0	1	0	0	0	0	0	0	0	1	0	0	0	0	0	0	0	0	2	0	0	0	0	1	0	0	1	1	1	1	0	0
LMOSA_12910	9	2	4	2	4	2	9	3	3	8	2	3	6	7	9	5	1	6	4	1	13	7	4	12	3	4	3	6	0	7	5	12	4	3	1	4	11	5	5	5	8	6	5	5	8	5	8	6	7
LMOSA_12920	0	0	0	0	0	0	0	0	0	0	0	0	0	0	2	0	0	0	0	0	0	0	0	0	0	0	0	0	0	0	0	0	0	0	0	0	0	0	0	0	0	0	0	0	0	0	0	0	0
LMOSA_12930	0	0	0	0	0	0	0	0	0	0	0	1	0	0	0	0	0	0	0	0	0	0	0	0	0	0	0	0	0	0	0	0	0	0	0	0	0	1	0	2	0	1	0	2	0	0	0	0	1
LMOSA_12940	0	0	0	0	0	0	0	0	0	0	0	0	0	0	0	0	0	0	0	0	0	0	0	0	0	0	0	0	0	0	0	0	0	0	0	1	2	0	0	0	0	0	0	0	0	0	0	0	0
LMOSA_12950	0	0	1	0	0	0	0	0	1	0	0	0	0	0	0	0	0	0	1	0	0	0	0	0	1	0	0	0	0	0	0	0	0	0	0	0	2	0	0	1	0	1	0	1	0	0	0	0	1
LMOSA_12960	0	0	0	0	0	0	0	0	0	0	0	0	0	0	1	0	1	0	0	0	0	0	0	0	0	0	0	1	0	0	0	0	0	0	0	0	2	0	0	0	0	0	2	0	1	0	0	0	0
LMOSA_12970	0	0	0	0	0	0	0	0	1	0	0	0	0	1	0	0	2	2	0	0	1	0	0	2	1	0	0	2	0	0	1	0	0	0	1	0	0	0	3	1	0	0	3	0	0	1	1	0	0
LMOSA_12980	1	0	0	0	0	0	0	0	0	0	0	0	0	1	0	0	0	0	0	0	0	0	0	0	0	0	0	0	0	0	0	0	0	0	0	0	0	0	0	0	0	0	0	0	0	0	0	0	0
LMOSA_12990	5	3	1	3	5	0	7	6	2	10	2	7	4	1	5	16	9	5	2	2	6	4	3	14	6	4	1	2	2	2	1	1	0	2	0	3	9	0	10	8	4	3	7	3	5	4	2	2	4
LMOSA_130	5	2	2	5	5	1	6	1	4	1	5	2	8	5	7	0	7	4	1	2	5	3	4	4	5	10	10	8	2	4	3	3	2	5	4	10	10	6	8	6	4	3	6	10	6	9	7	4	9
LMOSA_1300	8	5	6	12	9	10	10	7	9	7	12	8	15	11	19	3	15	9	3	2	11	5	12	14	6	11	4	12	9	8	8	12	10	14	14	17	23	7	13	29	14	17	25	27	20	18	14	33	27
LMOSA_13000	2	2	8	2	9	5	7	1	6	3	10	10	18	14	35	15	61	17	11	7	11	4	10	12	23	10	7	12	3	6	5	2	7	11	11	14	15	11	12	14	14	12	10	16	12	13	11	21	17
LMOSA_13010	0	3	4	2	8	6	10	10	6	5	16	9	25	17	41	15	62	28	13	11	4	9	7	1	6	8	6	12	8	6	4	12	11	14	12	16	23	10	9	21	22	8	16	15	16	24	17	20	12
LMOSA_13020	28	11	23	17	23	21	36	18	19	23	25	26	78	67	146	20	217	67	52	23	25	37	27	40	50	31	13	39	29	28	12	36	21	48	37	92	60	66	58	52	28	29	53	55	46	62	37	92	55
LMOSA_13030	56	22	26	49	40	39	65	43	53	59	51	35	172	147	238	58	375	147	104	47	67	58	72	97	109	72	53	99	49	83	34	50	47	96	58	157	130	118	135	106	68	92	105	139	86	83	109	157	147
LMOSA_13040	9	3	6	9	3	3	6	5	6	5	5	7	18	32	41	39	48	20	14	8	12	13	8	30	17	18	6	8	4	3	2	12	2	17	7	16	19	20	14	33	10	13	32	26	27	18	14	36	28
LMOSA_13050	35	18	18	29	30	20	20	22	19	21	19	11	20	24	21	51	18	9	8	0	10	8	8	17	9	28	11	20	25	31	9	25	16	16	17	22	39	31	41	62	35	22	30	40	21	25	19	47	32
LMOSA_13060	3	5	0	4	4	0	4	8	3	5	2	9	3	2	1	17	4	4	0	1	4	4	3	1	2	4	4	0	1	3	1	2	1	3	1	3	3	2	1	5	7	3	0	3	2	1	5	4	10
LMOSA_13070	62	32	41	43	45	47	70	75	56	34	43	33	57	37	91	30	56	47	32	14	20	23	18	36	26	32	39	90	52	73	33	93	48	77	51	65	82	67	64	119	69	54	92	97	69	71	88	104	118
LMOSA_13080	33	21	18	13	17	19	32	20	22	11	13	13	29	20	29	3	20	14	4	3	3	2	2	9	4	3	2	37	29	39	14	29	21	31	31	67	57	45	43	143	140	69	102	108	92	73	66	98	96
LMOSA_13090	29	22	20	26	22	13	35	36	22	40	25	34	26	18	45	12	69	27	17	6	24	19	16	45	26	34	28	53	22	37	19	66	19	35	19	31	72	21	30	64	53	40	54	42	30	36	51	73	47
LMOSA_1310	8	7	11	8	15	14	11	4	5	8	5	14	13	8	12	9	10	7	6	4	8	8	12	24	14	24	20	20	4	18	11	12	11	10	13	3	19	9	7	20	11	13	22	15	15	16	12	20	29
LMOSA_13100	72	58	35	55	68	38	80	67	56	73	72	63	69	63	105	38	115	69	51	33	35	70	45	88	103	76	75	69	47	77	62	85	54	62	55	69	99	55	64	96	85	42	77	102	93	52	62	105	102
LMOSA_13110	4	3	2	3	6	4	5	4	2	1	3	4	6	4	11	1	13	7	7	1	2	1	4	11	6	8	7	4	2	14	0	3	3	4	1	9	13	3	4	7	7	3	6	9	5	3	4	3	7
LMOSA_13120	14	8	8	9	11	14	12	4	11	10	25	22	17	7	7	17	26	14	8	17	21	15	26	36	79	39	17	21	10	13	5	19	13	9	16	16	17	15	24	21	12	16	17	10	15	7	9	15	17
LMOSA_13130	8	4	2	5	4	5	6	2	6	3	5	11	11	9	9	3	14	9	3	6	4	3	8	6	8	12	3	4	4	5	5	11	7	2	8	12	15	9	8	19	33	25	11	22	14	14	18	19	14
LMOSA_13140	1	0	0	1	0	0	0	0	0	0	0	0	0	0	0	0	0	0	0	0	0	0	0	0	0	0	0	0	1	0	0	0	0	0	0	0	1	0	0	0	0	0	0	0	0	0	0	0	0
LMOSA_13150	22	10	11	10	22	10	13	18	11	11	9	18	18	9	30	29	32	27	13	9	17	18	13	21	5	16	17	10	8	21	6	31	12	19	16	11	27	21	25	33	31	9	14	28	20	14	19	30	23
LMOSA_13160	29	22	20	29	37	31	35	27	40	26	23	16	37	28	51	16	52	34	22	20	25	20	25	53	26	47	33	45	28	38	27	39	24	36	36	39	49	33	43	43	41	24	42	54	37	19	51	48	56
LMOSA_13170	467	308	247	316	340	363	268	304	239	233	287	171	211	204	317	703	380	290	209	189	260	211	407	661	346	588	467	467	239	535	297	422	393	396	336	484	596	559	657	847	856	464	735	775	354	450	527	817	660
LMOSA_13180	5	1	0	0	1	2	2	1	0	0	3	1	1	0	4	6	7	4	6	3	4	3	3	5	1	3	2	0	0	2	2	1	4	2	1	1	3	1	1	6	9	2	2	2	4	1	5	6	5
LMOSA_13190	2	0	0	1	0	2	3	0	0	3	1	2	8	4	7	5	0	3	3	1	2	0	1	6	1	0	3	0	0	0	2	2	2	1	1	3	1	1	1	1	3	2	0	1	5	1	4	4	2
LMOSA_1320	41	26	28	37	32	30	30	21	25	20	20	25	38	53	45	11	66	33	47	21	79	32	41	131	21	108	69	72	30	37	29	51	48	44	28	66	49	59	57	70	40	41	60	73	39	43	63	62	61
LMOSA_13200	0	1	0	0	0	0	1	0	0	0	0	0	0	0	0	0	0	0	0	0	0	0	0	1	0	2	0	0	0	0	0	0	0	0	0	0	0	0	0	0	0	1	0	1	0	0	1	0	2
LMOSA_13210	0	2	0	1	4	3	2	1	3	0	2	2	3	2	1	4	2	1	0	0	1	1	1	0	0	1	2	0	0	0	0	3	1	2	0	0	6	0	2	4	1	2	1	0	2	0	1	0	0
LMOSA_13220	5	2	0	4	3	1	2	1	6	3	3	6	9	3	7	1	14	6	4	3	5	3	9	10	6	10	6	4	3	4	5	5	3	3	1	5	7	0	6	7	7	7	5	11	6	6	3	2	8
LMOSA_13230	0	0	0	1	0	1	0	0	0	0	0	0	1	1	1	0	1	2	2	0	1	0	2	7	0	1	0	3	0	4	0	2	1	0	0	0	1	1	0	1	1	0	1	1	3	0	1	3	1
LMOSA_13240	4	4	9	5	8	5	8	7	16	6	10	6	17	8	20	7	22	5	10	3	10	6	9	9	10	25	8	14	4	3	2	4	6	8	4	14	14	13	17	8	10	6	17	11	7	6	8	8	8
LMOSA_13250	0	2	0	2	0	3	2	1	7	1	2	4	4	0	3	0	10	4	2	0	3	0	0	0	1	6	1	3	1	3	2	3	3	3	2	2	4	6	7	4	4	1	1	5	0	2	1	5	4
LMOSA_13260	0	2	0	0	0	1	0	3	1	0	0	0	3	2	3	1	5	5	1	0	2	1	0	6	0	3	1	3	0	0	0	2	1	1	4	1	5	1	3	4	2	3	1	0	0	2	3	3	1
LMOSA_13270	3	2	1	4	4	6	8	3	3	7	6	3	9	4	9	9	12	8	3	2	4	3	12	12	3	3	4	9	2	3	2	1	8	2	6	6	9	4	15	7	6	2	9	8	8	8	7	2	7
LMOSA_13280	8	6	11	9	20	15	30	17	15	14	10	20	18	16	34	9	55	12	15	8	14	11	15	21	14	37	12	25	12	24	9	21	16	20	22	24	29	27	28	37	17	26	42	35	14	18	19	36	28
LMOSA_13290	2	2	8	6	10	3	9	3	11	13	13	16	4	6	10	16	18	16	8	7	26	11	6	22	19	19	12	12	11	5	6	12	7	8	8	6	15	5	15	22	13	9	10	13	3	10	8	23	16
LMOSA_1330	3	3	0	1	6	2	10	4	2	3	0	4	2	1	3	4	1	3	0	0	1	2	3	2	2	1	3	2	1	7	2	4	1	1	2	0	3	3	1	7	6	0	3	1	2	5	2	10	3
LMOSA_13300	0	1	0	1	1	1	0	1	0	0	1	1	1	2	4	0	0	1	2	0	0	0	1	1	0	2	1	1	1	0	0	2	0	3	0	0	1	1	0	3	0	1	0	3	2	1	1	1	1
LMOSA_13310	1	2	2	1	1	5	0	4	3	1	2	0	5	2	2	0	9	2	4	1	2	1	1	3	2	5	1	1	2	6	2	2	2	2	3	4	4	5	2	11	8	3	2	4	3	6	2	6	4
LMOSA_13320	3	3	7	1	7	7	6	6	3	3	6	3	11	4	6	0	7	6	6	3	3	2	2	8	0	1	3	10	2	4	6	9	4	5	9	4	14	10	7	21	5	7	12	11	12	6	12	18	6
LMOSA_13330	61	44	43	74	91	94	61	73	76	51	77	68	92	80	169	0	215	104	85	64	120	87	125	186	93	207	79	130	75	118	66	138	77	123	81	164	202	140	200	269	214	181	248	295	138	158	160	239	213
LMOSA_13340	4	3	2	2	11	6	4	4	2	2	2	1	3	4	6	0	5	4	2	1	5	6	2	6	2	11	6	8	2	8	1	4	3	6	2	4	8	9	6	15	12	9	8	6	10	7	5	10	13
LMOSA_13350	0	0	0	0	0	0	0	0	1	1	0	0	0	0	0	0	0	0	0	0	0	0	0	0	0	0	1	0	0	0	0	0	0	0	0	0	0	0	0	0	0	0	0	0	0	0	1	0	0
LMOSA_13360	0	0	0	0	0	1	0	0	1	0	0	0	0	1	1	0	1	1	0	0	0	0	0	0	0	0	1	0	0	0	0	0	0	0	1	1	0	0	1	0	3	1	2	0	1	0	0	1	0
LMOSA_13370	1	1	0	0	0	1	0	1	0	1	0	0	1	0	1	0	0	0	0	0	0	0	1	0	1	0	0	2	0	0	1	1	0	1	0	0	1	0	2	2	3	2	1	2	2	0	2	2	1
LMOSA_13380	1	1	1	0	1	0	2	1	0	0	0	0	0	0	0	0	0	0	0	1	0	0	0	0	1	0	1	0	0	0	1	0	0	0	0	1	0	1	0	3	5	0	2	3	6	0	2	4	0
LMOSA_13390	1	0	1	0	0	0	0	2	0	0	0	0	0	0	1	0	0	0	0	0	0	0	0	0	0	0	0	0	0	0	1	0	0	0	0	0	2	1	0	2	0	1	2	0	3	0	1	1	0
LMOSA_1340	4	2	4	3	4	4	2	7	3	5	6	5	9	4	2	5	13	2	6	1	4	1	7	12	5	9	3	3	4	2	0	9	6	4	9	7	2	7	8	10	5	11	8	16	7	6	11	11	8
LMOSA_13400	0	0	0	0	0	0	0	0	0	0	0	0	0	0	0	0	0	0	1	0	0	0	0	0	0	0	0	0	0	0	0	0	0	0	0	0	1	0	0	0	1	0	0	0	0	0	0	0	1
LMOSA_13401	0	0	1	0	1	0	0	0	0	0	0	1	0	0	0	0	0	0	0	0	0	1	0	0	0	0	0	0	1	0	1	0	0	1	0	0	0	0	0	0	2	0	0	0	0	0	0	1	1
LMOSA_13410	0	0	0	0	0	0	1	0	0	0	0	0	0	0	2	0	0	0	0	0	1	0	1	0	0	2	0	0	0	1	1	0	0	1	0	1	3	0	1	1	0	2	1	3	0	1	0	0	1
LMOSA_13411	0	1	0	0	1	1	0	0	1	0	0	0	1	0	0	0	0	1	3	0	0	0	0	1	0	0	0	0	1	0	0	1	0	0	0	0	1	0	0	1	1	2	3	1	1	0	0	0	0
LMOSA_13420	1	1	0	0	2	0	2	0	0	1	1	1	0	1	0	0	0	0	1	1	0	1	0	2	2	1	1	0	1	4	2	0	0	1	1	1	3	3	1	9	1	0	2	1	3	2	1	5	0
LMOSA_13430	0	3	3	0	0	1	1	3	1	0	2	1	0	2	1	0	0	0	1	1	1	0	0	3	0	0	0	2	0	0	0	1	0	1	3	0	0	5	1	1	0	0	2	2	0	1	2	3	3
LMOSA_13440	4	2	0	0	2	1	1	0	0	0	1	2	0	2	2	0	0	2	0	1	2	0	1	1	1	0	0	0	1	1	1	4	2	0	0	2	4	0	2	4	3	2	0	2	1	1	1	2	2
LMOSA_13450	1	2	0	1	1	1	0	0	1	0	2	3	1	1	1	0	2	0	0	1	0	0	2	4	0	4	4	2	0	1	0	3	4	0	3	1	1	0	0	4	0	2	1	0	1	0	0	2	2
LMOSA_13460	0	0	0	0	0	0	0	0	0	0	0	0	0	0	0	0	0	1	0	0	0	0	0	0	0	0	0	0	0	0	0	0	0	0	0	0	0	0	0	0	0	0	0	0	0	0	0	0	0
LMOSA_13470	6386	3929	4411	6313	7210	6820	6149	4707	4910	4148	4831	4425	7441	5582	12318	12578	16764	9156	6363	5321	8506	6620	11599	12938	8223	13277	8510	10519	5661	8413	4934	9583	6066	9589	6964	13341	13116	11754	12202	19104	11969	11129	20672	20190	10652	18501	17839	24301	27865
LMOSA_13480	586	423	399	504	600	523	543	374	346	416	361	387	459	408	783	342	974	600	407	294	503	410	643	1081	611	757	570	835	472	696	415	831	476	579	535	795	772	723	837	709	379	350	564	609	348	655	657	917	1170
LMOSA_13490	1	3	0	0	3	1	2	0	1	0	2	1	0	0	1	0	2	0	0	1	1	0	0	1	0	2	0	1	0	0	0	0	1	1	0	0	2	1	1	1	0	1	0	1	0	0	2	1	0
LMOSA_1350	1	2	2	0	1	2	0	2	2	1	4	1	0	7	6	12	7	6	5	0	2	5	0	6	4	4	3	2	0	2	2	0	1	1	4	6	6	2	3	13	6	5	9	12	6	6	14	5	11
LMOSA_13500	2	2	3	4	3	5	2	3	3	6	2	3	0	3	3	5	0	1	2	3	3	5	9	6	4	5	4	5	3	2	1	5	3	3	0	3	4	5	1	8	2	3	3	7	3	2	1	2	5
LMOSA_13510	1	0	0	0	0	1	0	2	0	0	0	0	0	0	0	0	0	0	0	0	0	0	0	1	0	3	2	0	0	1	0	2	0	1	0	0	0	0	1	0	0	0	1	3	0	1	0	1	0
LMOSA_13520	23	14	7	14	20	11	19	13	20	14	14	14	20	14	22	3	20	21	15	4	9	11	13	20	14	16	12	25	19	18	11	32	15	17	12	21	18	15	14	31	7	15	26	14	9	16	21	28	24
LMOSA_13530	3	1	0	0	0	3	3	1	2	1	0	1	1	1	1	3	1	2	0	1	2	1	2	1	2	2	0	1	0	0	0	3	1	1	1	0	1	0	1	2	2	4	0	1	1	0	0	3	0
LMOSA_13540	25	15	22	21	46	30	35	42	31	25	33	29	18	19	33	37	49	21	26	22	26	16	50	72	25	44	31	45	23	33	20	47	23	28	18	32	54	26	48	50	26	33	48	46	22	21	21	46	41
LMOSA_13550	1	0	0	0	0	0	0	0	0	0	0	1	0	0	0	0	0	0	0	0	0	0	0	1	0	0	0	0	0	0	0	0	0	0	0	0	0	0	0	0	1	0	0	0	0	0	0	0	0
LMOSA_13560	36	28	28	33	29	34	63	61	53	39	47	43	54	41	44	104	44	33	44	25	42	39	65	168	51	83	60	42	28	36	17	44	29	30	29	45	65	39	61	62	56	26	37	74	42	43	37	93	63
LMOSA_13570	3	1	2	4	1	2	4	4	0	1	7	3	2	2	6	0	7	5	2	5	4	4	6	9	2	6	5	0	0	3	1	0	1	1	2	2	1	2	2	1	5	0	3	5	4	1	2	2	5
LMOSA_13580	0	1	1	3	2	1	2	5	3	3	3	3	2	2	2	12	2	3	1	2	1	5	0	4	5	0	6	0	1	6	2	10	1	0	0	1	5	5	3	8	6	4	7	5	4	3	7	5	7
LMOSA_13590	1	2	2	2	2	6	5	2	1	7	4	3	5	4	5	3	11	6	2	2	3	2	4	13	0	7	3	2	3	3	3	2	2	1	5	4	6	3	11	11	7	2	4	8	4	4	10	7	9
LMOSA_1360	6	1	5	10	6	2	13	7	5	7	4	4	3	10	9	4	11	9	8	2	7	2	7	16	7	6	5	10	3	5	2	6	5	8	3	11	8	13	7	13	11	4	7	17	4	8	9	16	7
LMOSA_13600	2	0	2	0	2	2	3	5	4	3	4	9	1	1	6	3	2	3	4	2	7	1	7	7	2	10	9	9	0	9	3	5	2	5	4	6	6	7	6	9	8	3	4	7	3	2	4	6	4
LMOSA_13610	15	16	7	13	19	18	11	9	15	18	35	16	9	5	11	26	15	11	9	4	13	14	27	21	13	26	12	31	20	34	17	19	23	20	23	13	30	29	29	42	26	18	23	39	20	13	14	28	23
LMOSA_13620	1	2	3	1	3	3	2	2	3	1	3	5	1	4	4	8	3	3	0	3	4	3	1	6	2	4	10	8	4	4	3	5	5	3	7	3	3	7	5	9	2	6	6	6	5	3	5	6	12
LMOSA_13630	9	3	5	4	4	5	5	8	12	4	9	4	4	7	7	19	7	4	6	7	8	6	5	20	7	15	5	13	5	6	8	6	7	7	6	9	14	6	9	22	15	7	19	14	9	6	17	16	9
LMOSA_13640	14	12	12	19	21	18	13	11	14	11	12	11	16	12	18	18	20	15	5	5	16	6	22	24	15	24	16	9	14	9	8	10	8	14	17	11	25	16	13	25	29	22	27	37	9	7	24	27	24
LMOSA_13650	3	1	3	0	0	1	0	0	2	2	1	0	1	1	0	0	0	1	0	1	0	0	0	0	1	0	0	0	0	5	0	0	0	2	0	0	1	1	0	1	1	0	2	1	2	2	0	0	0
LMOSA_13660	6	2	3	4	3	3	7	1	1	5	5	2	8	2	4	5	7	1	2	0	2	1	5	8	6	3	2	2	2	4	1	7	4	2	3	4	6	3	4	1	1	3	0	1	0	4	2	3	9
LMOSA_13670	4	2	1	2	3	4	5	1	3	1	1	2	2	1	1	3	6	4	1	2	6	0	4	2	4	6	2	2	0	4	1	0	0	4	1	4	3	2	3	1	1	2	3	1	2	1	2	4	4
LMOSA_13680	18	11	6	8	9	6	12	6	5	8	2	2	12	12	16	0	15	6	3	7	4	6	2	11	7	5	7	19	4	11	4	14	8	14	7	6	6	14	6	15	4	6	20	12	4	10	10	22	23
LMOSA_13690	5	3	5	1	3	5	2	6	1	2	4	4	4	5	5	0	9	5	7	1	3	3	1	2	8	1	3	13	7	1	1	4	6	7	7	10	10	7	3	17	5	10	10	7	4	12	3	18	8
LMOSA_1370	5	3	6	4	3	8	3	6	7	6	1	3	3	8	5	7	2	6	5	1	6	2	10	19	7	7	11	1	3	7	1	6	6	3	2	2	7	0	3	11	6	1	9	5	1	4	3	8	8
LMOSA_13710	0	0	0	1	1	2	3	0	0	0	0	0	3	0	0	0	0	1	0	1	1	1	1	0	1	1	1	1	0	2	0	0	2	0	1	0	0	2	0	1	0	1	0	3	0	0	0	1	1
LMOSA_13720	2	0	0	0	1	0	0	0	0	1	1	0	0	0	1	0	2	0	0	0	0	0	0	0	0	1	0	1	2	0	0	1	0	0	0	0	0	0	0	0	0	0	0	3	0	0	0	2	0
LMOSA_13730	0	0	1	1	0	2	1	0	0	0	0	0	0	2	1	0	0	0	0	2	0	0	0	0	0	0	0	0	0	0	2	7	0	0	2	0	0	2	2	0	1	0	1	0	1	2	0	0	3
LMOSA_13731	0	0	1	1	4	0	2	4	1	4	1	2	2	2	1	0	5	1	0	0	1	0	0	0	0	4	2	5	1	5	0	1	1	2	1	1	1	2	1	6	3	2	1	1	1	0	2	2	2
LMOSA_13740	0	0	0	0	0	0	0	0	1	0	0	0	0	0	0	0	0	0	0	0	0	0	0	0	0	0	0	0	0	0	0	0	0	1	0	0	0	0	0	0	0	0	0	0	1	0	0	1	0
LMOSA_13750	36	36	43	25	36	22	19	29	15	8	7	13	26	31	34	0	19	9	6	4	18	8	9	13	6	6	12	15	5	35	12	32	21	42	24	39	76	40	58	202	182	90	137	163	88	90	120	162	113
LMOSA_13760	207	152	110	133	146	129	116	128	112	90	101	132	224	179	216	0	244	164	73	39	113	56	80	140	125	103	105	89	45	127	67	100	90	120	135	173	256	154	218	374	352	256	239	390	301	175	177	461	350
LMOSA_13770	10	11	5	3	8	10	4	2	7	3	4	1	10	4	14	0	11	1	3	0	1	3	1	4	2	1	0	4	4	4	4	4	6	14	11	7	12	18	18	35	35	16	21	38	13	8	13	18	11
LMOSA_13780	13	7	4	4	7	7	3	5	11	6	10	12	14	8	12	12	4	8	3	4	3	1	1	4	3	3	1	2	1	0	2	2	0	5	9	4	10	8	7	10	10	6	8	21	10	6	6	18	5
LMOSA_13790	1	1	1	0	0	1	0	6	2	0	2	1	2	3	1	0	1	1	2	0	0	0	2	0	0	0	0	2	0	1	1	3	1	1	2	3	1	4	0	0	2	0	0	2	2	4	0	1	2
LMOSA_1380	6	1	6	0	5	0	2	0	0	0	1	1	2	0	0	27	2	2	0	1	0	0	3	1	0	4	4	3	3	8	1	9	17	3	5	4	6	2	13	12	17	16	8	22	12	8	23	30	21
LMOSA_13800	0	0	0	0	0	0	0	0	1	0	0	0	0	0	0	0	0	0	0	0	0	0	0	0	0	0	0	0	0	0	0	0	1	0	0	0	0	0	0	0	0	0	0	0	0	0	0	0	0
LMOSA_13801	0	0	0	0	0	0	0	0	0	0	0	0	0	0	0	0	0	0	0	0	0	0	0	0	0	0	0	0	0	0	0	0	0	0	0	0	0	0	0	0	0	0	0	0	0	0	0	0	0
LMOSA_13810	2915	2228	2006	2327	3031	2691	1430	1493	1614	1183	1886	1429	2226	1949	2484	3	3704	2971	1848	1476	2260	1799	2762	5006	2183	3680	2606	2218	1346	3281	1370	2612	2194	2309	2574	3444	4664	3283	4396	6616	7803	3418	4985	6407	3272	3314	4035	5547	4900
LMOSA_13820	582	664	343	562	751	727	374	567	486	475	566	564	543	487	553	1	1218	741	570	484	737	573	641	1262	758	839	939	298	266	477	293	432	301	487	398	617	897	478	673	982	1856	683	935	1097	695	571	786	1243	857
LMOSA_13830	35	18	32	34	55	58	29	39	42	22	41	32	30	18	30	22	59	19	14	11	27	33	38	92	33	95	11	37	21	32	25	53	41	24	18	38	67	56	59	65	37	55	61	60	34	36	25	66	51
LMOSA_13840	87	57	96	138	166	154	83	64	86	74	111	91	97	48	99	48	137	62	52	31	87	112	169	262	91	291	102	100	55	120	53	140	92	78	69	188	150	141	164	139	68	93	140	151	97	58	92	168	111
LMOSA_13850	13	2	11	11	11	12	13	14	17	8	10	13	18	11	15	5	15	8	15	9	9	16	25	46	16	55	14	17	10	22	9	18	22	12	10	12	37	15	17	25	20	21	18	12	11	13	15	37	23
LMOSA_13860	33	21	33	31	52	44	47	43	28	30	49	41	57	47	56	24	123	88	45	31	38	44	40	44	47	47	48	27	28	53	37	43	33	37	48	58	95	66	40	80	151	63	83	96	73	60	84	89	93
LMOSA_13870	7	10	11	10	22	5	15	13	20	15	19	18	14	17	36	2	41	35	28	38	35	27	16	29	30	22	32	2	10	13	7	9	18	11	13	18	18	19	17	39	81	42	38	42	57	25	53	44	42
LMOSA_13880	1	0	0	1	1	0	0	0	0	0	0	0	0	0	1	0	3	0	0	0	2	0	3	0	0	2	2	1	0	0	0	0	0	0	0	0	0	0	0	5	0	0	1	0	1	0	1	0	0
LMOSA_13890	11	10	8	5	9	2	12	3	8	4	2	4	6	10	14	0	15	7	7	3	6	8	4	25	9	23	9	4	6	10	2	18	5	16	2	12	19	6	18	11	20	16	14	28	10	15	10	16	23
LMOSA_1390	1	5	1	1	1	3	2	1	2	1	0	5	3	0	1	4	1	7	3	0	0	1	0	0	0	0	0	0	0	0	0	0	0	1	0	0	0	0	0	0	2	2	0	0	1	1	0	0	2
LMOSA_13900	4	2	0	1	1	2	3	2	1	2	2	0	1	1	1	0	6	2	2	2	3	0	0	3	3	1	2	2	0	5	1	2	1	5	3	2	8	0	1	6	4	3	9	8	0	1	2	5	6
LMOSA_13910	12	13	8	10	9	9	19	14	12	12	12	16	17	11	17	3	13	11	12	9	21	12	18	18	17	38	16	8	11	22	8	13	5	13	9	13	6	18	9	17	7	7	14	27	15	7	12	22	18
LMOSA_13920	17	21	3	5	16	12	9	13	12	18	5	12	6	5	2	14	5	8	10	3	3	5	3	4	5	8	18	3	3	1	2	5	1	6	12	6	3	2	3	1	7	1	4	2	4	3	3	3	5
LMOSA_13930	11	9	5	11	19	22	21	14	8	14	11	18	21	19	17	5	20	16	15	4	7	12	10	8	12	16	14	2	9	8	9	6	8	13	8	5	11	6	6	7	7	5	8	19	11	12	9	19	21
LMOSA_13940	8	8	8	11	8	7	15	11	10	6	13	17	15	19	14	15	44	13	18	4	13	7	21	26	9	39	13	7	14	24	6	22	9	15	7	26	16	21	21	29	16	13	33	24	16	22	13	35	26
LMOSA_13950	3	0	2	1	5	2	4	3	4	5	3	3	5	0	3	2	2	1	1	2	1	1	4	3	3	3	3	3	4	0	0	1	1	0	0	5	2	1	1	3	0	2	5	2	0	1	4	2	7
LMOSA_13960	1	1	4	0	2	0	2	2	3	1	2	3	4	0	2	2	4	3	1	0	2	1	2	3	0	3	0	4	2	4	2	2	4	6	0	2	1	2	4	1	4	0	2	1	1	5	0	5	1
LMOSA_13970	4	3	6	4	4	3	2	4	3	3	3	3	5	4	4	4	3	3	3	0	8	7	9	5	0	8	1	5	3	3	0	3	1	5	7	6	4	8	3	8	1	3	2	10	4	3	4	8	1
LMOSA_13980	4	6	9	5	3	6	5	12	6	7	4	17	5	12	3	14	5	9	6	5	12	6	9	34	11	15	11	6	3	8	5	5	5	7	1	1	5	1	7	8	11	9	5	5	7	5	6	17	14
LMOSA_13990	1	0	6	0	1	0	1	0	0	0	0	0	0	0	1	1	1	10	0	0	2	0	1	1	1	6	3	2	0	2	0	1	0	1	0	1	3	0	3	3	0	0	0	5	4	3	2	1	5
LMOSA_140	4	0	0	1	0	1	2	3	1	1	1	0	0	0	2	0	1	3	0	0	3	3	2	0	0	1	1	0	1	3	0	1	1	1	0	0	1	1	2	3	4	1	3	6	2	1	0	5	1
LMOSA_1400	3	2	2	5	1	3	2	3	1	5	0	1	4	2	3	4	7	3	3	2	5	2	3	9	6	5	5	2	0	2	4	1	2	2	2	7	3	3	3	6	1	1	2	2	2	4	0	2	2
LMOSA_14000	7	7	8	10	10	13	11	12	11	15	15	7	18	8	8	18	11	13	12	11	17	20	13	31	22	23	24	5	3	14	8	11	9	10	6	12	7	8	8	12	24	15	11	12	15	11	2	18	15
LMOSA_14010	1	2	0	3	4	5	2	0	3	3	1	1	2	3	5	3	5	2	2	2	2	3	6	7	1	5	4	4	3	4	5	6	1	1	1	1	2	2	3	5	3	3	1	4	4	5	2	0	3
LMOSA_14020	57	47	20	26	30	34	73	77	30	83	36	37	16	16	10	4	9	15	5	5	7	5	5	3	5	3	0	33	20	21	37	25	15	8	7	7	16	6	6	3	0	3	5	1	5	1	4	2	6
LMOSA_14030	2	1	0	0	0	1	5	1	1	1	1	0	1	0	1	1	1	0	0	1	0	0	1	0	2	1	1	7	5	0	0	1	1	0	0	3	0	0	0	1	0	0	1	0	0	1	0	1	0
LMOSA_14040	1	1	1	0	0	0	0	3	1	1	0	0	1	0	0	1	1	1	0	0	0	0	0	0	1	3	0	5	5	2	0	1	1	3	1	1	0	1	1	1	0	0	0	0	0	0	1	1	2
LMOSA_14050	2	0	1	1	0	1	4	1	3	1	2	2	0	0	1	0	2	0	1	0	0	1	0	6	1	2	0	2	0	0	2	2	0	1	0	0	1	2	1	0	1	0	0	0	0	0	0	0	2
LMOSA_14060	1	7	4	6	7	6	13	9	5	8	9	5	12	14	10	14	11	9	6	6	8	6	8	10	4	13	5	22	2	8	11	14	7	12	9	10	10	12	14	30	22	8	25	21	16	16	18	22	25
LMOSA_14070	5	0	1	3	1	0	0	1	2	1	0	2	3	2	4	2	3	3	1	0	0	2	4	8	1	2	3	1	0	2	1	1	1	3	0	1	1	1	3	6	5	1	1	2	1	2	5	2	6
LMOSA_14080	4	1	0	4	2	1	2	2	1	1	1	1	1	3	5	1	2	4	2	3	4	4	1	1	2	2	1	3	0	1	1	0	1	3	0	2	5	1	1	5	6	2	7	6	1	3	5	8	5
LMOSA_14090	3	1	1	2	0	0	1	0	0	2	2	1	0	2	2	2	3	2	1	0	1	2	2	0	3	0	2	5	0	1	1	1	3	0	2	2	4	2	3	3	6	4	6	6	0	2	4	4	2
LMOSA_1410	44	24	25	24	24	43	60	37	31	33	32	47	40	30	35	45	63	32	27	20	40	26	36	50	42	42	37	27	8	35	15	35	16	24	19	57	55	32	37	30	38	23	32	36	27	24	21	43	46
LMOSA_14100	1	1	2	1	3	2	7	4	1	2	5	3	4	4	5	2	4	7	5	3	2	1	4	4	3	9	8	2	1	8	3	2	2	6	2	5	3	1	7	16	16	4	7	15	3	5	7	15	7
LMOSA_14110	2	5	0	2	2	3	4	1	2	2	0	1	3	3	5	1	6	9	4	0	7	4	2	6	3	2	3	3	2	2	1	1	5	2	3	4	3	1	2	11	2	3	5	9	9	4	4	5	12
LMOSA_14120	1	2	1	1	2	0	0	1	0	0	0	1	0	0	2	1	3	0	0	0	1	0	2	2	0	1	0	0	0	1	2	1	1	2	0	3	2	0	3	3	6	1	1	2	3	0	2	1	4
LMOSA_14130	5	1	3	1	4	7	1	1	5	1	4	4	3	4	5	2	5	7	3	4	2	1	2	0	1	8	1	4	0	2	2	7	4	4	3	6	6	2	5	6	1	4	5	5	7	3	5	5	5
LMOSA_14140	34	19	23	20	44	28	53	39	29	30	40	23	38	34	51	48	44	46	30	26	24	30	67	92	59	98	46	41	24	75	17	37	51	34	20	35	45	23	49	59	54	43	49	56	44	28	36	78	57
LMOSA_14150	0	0	1	0	0	0	0	2	0	0	0	0	0	0	0	0	0	0	0	0	0	0	0	0	0	1	0	0	0	0	0	0	0	0	1	0	0	0	0	0	1	0	0	1	0	3	2	2	2
LMOSA_14160	2	3	0	3	1	0	0	3	3	2	4	3	0	2	5	3	3	1	1	0	0	4	1	4	0	5	4	2	0	2	0	4	3	1	1	2	4	1	1	2	0	2	3	3	4	2	3	5	1
LMOSA_14170	11	12	4	3	7	2	8	10	9	11	5	3	8	3	6	1	7	14	9	2	0	8	12	13	11	16	18	11	4	4	3	10	9	7	6	1	8	5	13	15	16	6	7	11	10	5	11	15	12
LMOSA_14180	9	5	8	8	11	15	18	10	16	9	14	9	15	15	19	10	20	9	12	4	12	6	15	24	7	10	14	15	10	13	7	9	11	12	8	20	17	18	22	40	35	19	16	34	12	19	23	47	42
LMOSA_14190	4	5	2	0	4	2	6	2	4	2	1	3	2	1	0	0	1	3	4	0	6	2	7	14	4	46	5	4	2	5	4	6	0	1	0	2	4	0	2	1	5	5	2	4	3	3	2	2	2
LMOSA_1420	108	56	51	63	71	57	86	90	76	64	85	81	107	63	133	54	272	86	91	56	137	101	125	230	121	210	93	142	78	83	57	110	64	131	89	156	238	171	171	161	115	80	156	158	92	99	92	130	157
LMOSA_14200	1888	1327	912	1304	1601	1233	1961	1476	978	1657	1095	1657	1706	1274	1755	1498	2266	1335	946	559	850	988	980	1416	1571	1005	1084	1532	1152	1887	1124	2612	918	1184	1410	1145	1757	1063	1350	878	584	501	582	952	825	964	1011	1519	1746
LMOSA_14210	4	1	6	0	1	4	4	0	2	2	1	2	0	1	7	5	4	3	6	1	5	4	5	13	4	9	2	3	6	2	0	5	9	4	0	2	3	4	3	7	5	6	6	12	2	0	0	7	13
LMOSA_14220	0	0	0	0	1	3	0	0	0	2	0	0	0	1	3	0	0	1	0	0	0	0	1	0	0	2	1	0	0	0	1	1	0	0	0	0	2	1	0	1	0	0	0	0	2	1	0	0	0
LMOSA_14230	2	3	0	2	7	5	0	7	6	4	7	13	5	3	9	6	11	5	8	1	2	1	2	3	6	5	7	0	16	0	9	1	3	4	6	5	6	7	6	12	6	3	6	5	4	4	4	9	6
LMOSA_14240	9	4	4	6	0	3	4	5	5	3	5	4	3	3	8	19	3	2	1	0	3	4	9	9	9	14	8	3	5	2	2	2	1	3	0	4	11	5	3	1	4	3	0	3	4	3	1	4	2
LMOSA_14250	0	0	0	0	0	1	1	1	2	0	1	0	1	1	0	0	0	0	0	1	0	1	0	1	0	0	0	0	0	0	0	0	0	1	0	2	2	0	0	1	0	0	2	0	0	1	0	0	0
LMOSA_14260	43	22	37	37	44	51	63	43	57	49	33	43	60	67	109	89	152	72	75	36	75	41	54	81	57	98	34	93	47	68	65	101	51	61	57	92	105	89	94	136	86	95	139	170	92	95	123	151	144
LMOSA_14270	5	7	5	13	12	6	8	8	9	9	11	8	17	16	14	5	9	8	11	5	6	9	3	8	3	5	4	9	11	13	9	14	15	8	7	12	20	17	20	26	16	25	17	31	15	20	22	26	17
LMOSA_14280	0	0	0	0	1	0	0	0	0	0	0	0	0	0	0	0	0	0	0	0	0	0	0	2	1	0	0	0	0	0	1	0	0	0	0	0	0	1	0	0	0	0	1	0	0	2	0	2	1
LMOSA_14290	44	31	28	31	42	31	54	43	42	34	30	26	45	47	62	91	60	32	21	20	25	28	24	40	37	55	30	71	28	74	20	79	28	42	25	41	66	45	53	125	81	63	119	101	97	55	75	106	97
LMOSA_1430	135	75	91	97	93	97	195	156	112	139	134	143	162	134	226	135	342	168	176	76	212	142	212	309	180	299	126	275	111	154	100	179	123	190	151	210	279	260	301	308	173	150	195	228	128	183	179	335	237
LMOSA_14300	4	2	4	1	2	4	9	5	6	2	5	5	4	11	9	1	5	4	4	2	2	6	5	4	2	9	4	3	4	5	5	5	2	10	1	6	5	7	10	6	19	4	11	8	8	6	7	7	11
LMOSA_14310	12	11	7	5	10	8	7	11	9	10	4	5	10	6	18	3	18	19	6	2	5	11	7	16	11	17	6	11	8	10	6	7	12	12	8	10	16	10	9	20	23	13	19	12	10	8	11	21	24
LMOSA_14320	10	7	6	8	9	8	14	6	9	11	6	5	12	10	15	5	22	15	12	9	10	9	14	15	10	15	3	14	11	21	10	14	4	11	7	20	22	20	14	33	20	20	29	25	16	9	22	20	24
LMOSA_14330	23	11	9	10	12	8	19	12	5	10	8	6	9	8	12	4	20	19	9	3	7	10	7	17	4	10	7	39	22	13	13	19	19	13	15	10	27	22	19	44	24	33	43	32	22	25	25	45	17
LMOSA_14340	83	43	31	52	69	50	88	63	50	48	52	53	110	63	96	26	145	76	72	28	58	59	97	160	75	113	78	146	69	108	88	120	87	95	67	139	162	90	123	206	164	121	223	214	113	147	205	260	215
LMOSA_14350	27	20	9	16	25	12	27	24	17	15	20	21	17	20	20	10	60	31	19	6	25	25	37	41	25	33	31	56	34	53	29	42	22	30	29	32	45	30	28	69	50	19	38	44	35	40	31	66	57
LMOSA_14360	1	1	1	1	1	1	1	2	3	2	1	0	3	2	0	1	4	1	0	1	2	1	1	0	1	1	0	0	1	9	3	0	2	3	1	1	3	1	1	6	2	2	7	13	1	3	1	4	2
LMOSA_14370	1	0	0	1	1	0	2	0	1	0	0	1	0	0	1	1	0	0	0	0	0	0	0	1	0	0	0	0	1	0	1	1	0	1	1	0	1	0	1	1	0	0	0	1	0	0	0	0	0
LMOSA_14380	9	5	6	7	7	6	8	9	10	3	7	8	12	9	13	12	16	4	3	5	5	7	11	9	6	31	5	3	2	19	8	7	9	8	5	6	17	7	15	25	7	14	18	17	12	12	12	21	11
LMOSA_14390	58	39	32	47	67	37	59	27	35	27	40	47	70	53	61	42	99	59	41	14	41	33	58	79	54	116	67	66	35	51	20	43	61	35	51	57	63	63	81	95	44	58	67	106	57	60	69	101	85
LMOSA_1440	214	116	145	151	172	137	298	280	240	180	189	199	273	237	351	125	398	263	221	114	293	149	299	527	199	447	234	385	163	256	130	268	213	284	208	351	508	384	428	478	303	203	353	430	205	289	362	499	487
LMOSA_14400	112	47	64	74	86	55	102	94	103	76	103	53	125	107	124	22	203	129	106	67	103	64	173	179	107	222	142	194	68	132	88	93	89	122	99	140	167	143	149	139	123	69	97	107	60	98	106	133	140
LMOSA_14410	15	9	14	24	17	7	15	18	14	15	9	11	19	19	11	3	24	9	18	8	20	19	19	32	20	29	10	28	11	29	9	18	17	10	9	21	34	20	26	42	21	19	36	22	27	19	27	30	26
LMOSA_14420	10	15	15	24	25	15	23	25	26	20	28	30	20	26	27	20	55	10	15	16	22	14	33	49	36	51	13	53	30	31	24	49	31	22	15	28	44	36	34	48	28	41	43	56	27	19	20	44	22
LMOSA_14430	611	320	279	338	417	314	782	530	478	463	409	389	578	392	661	301	555	428	231	120	247	209	257	334	274	272	261	730	371	669	377	692	440	460	324	494	679	486	537	648	403	344	480	546	408	369	503	771	797
LMOSA_14440	618	384	290	477	534	422	587	485	438	431	462	364	629	508	691	200	1054	541	426	281	536	342	456	929	487	921	754	858	494	789	442	962	472	651	599	802	1338	722	970	1000	1184	698	817	1075	586	627	819	1272	857
LMOSA_14450	7	10	9	3	14	9	6	8	9	5	10	16	8	7	10	3	7	10	10	7	17	6	7	23	16	18	14	5	4	15	4	10	4	7	7	5	5	6	10	23	30	16	23	30	24	10	14	18	11
LMOSA_14460	0	2	0	1	2	0	0	0	0	1	0	1	1	4	3	0	6	3	3	2	7	0	7	15	3	7	7	1	0	1	1	2	4	0	1	3	2	2	6	8	12	12	12	15	5	9	3	11	4
LMOSA_14470	3	3	1	2	5	5	1	0	0	0	2	1	2	3	12	5	2	5	8	5	12	11	15	22	6	25	10	2	2	3	2	7	2	1	3	3	2	2	7	33	23	17	20	26	13	12	7	13	15
LMOSA_14480	1	0	0	0	4	0	0	0	3	0	1	2	3	1	3	5	7	4	3	2	12	3	4	8	7	23	2	1	0	2	4	1	3	1	0	0	2	1	1	10	6	4	12	11	3	5	4	7	11
LMOSA_14490	0	0	1	2	0	0	0	0	0	1	0	0	1	0	2	0	6	2	5	2	2	3	3	3	1	4	3	1	2	0	0	1	0	0	0	0	2	0	2	4	9	4	8	6	2	8	3	3	3
LMOSA_1450	106	133	62	64	85	84	34	37	35	32	21	48	65	74	100	4	95	87	28	15	25	12	10	19	25	13	17	11	25	40	21	60	33	53	44	60	81	60	76	55	38	40	37	64	69	51	79	164	113
LMOSA_14500	4	3	0	1	8	5	0	1	3	2	6	4	7	11	13	7	13	10	10	10	32	8	15	46	7	35	13	8	2	0	3	4	9	2	4	2	4	1	6	37	17	18	24	39	21	20	20	34	23
LMOSA_14510	1	0	0	0	2	0	2	2	2	1	1	3	0	0	0	6	0	1	1	0	1	1	1	1	0	6	0	1	0	0	0	1	1	1	0	0	2	1	0	1	2	0	1	0	1	0	2	3	1
LMOSA_14520	0	0	0	0	0	0	0	0	0	0	0	0	0	0	0	0	0	0	0	0	0	0	0	0	0	0	0	0	0	0	0	0	0	0	0	0	1	0	0	0	0	0	0	0	0	0	0	0	0
LMOSA_14530	1	0	0	2	1	1	1	0	2	0	0	0	1	0	1	0	3	0	1	0	1	0	0	2	0	0	0	0	0	0	1	2	0	0	1	3	0	1	1	2	1	0	1	3	0	4	1	1	1
LMOSA_14540	0	0	0	0	0	0	0	0	0	0	0	0	0	0	0	0	0	0	0	0	0	0	0	0	0	0	0	0	0	0	0	0	0	0	0	0	0	0	0	1	0	0	0	0	0	0	0	0	0
LMOSA_14550	0	0	0	0	1	1	2	0	1	0	1	0	2	1	1	2	1	1	3	0	0	3	2	2	3	1	3	6	1	2	1	0	1	1	1	1	0	4	1	1	3	1	1	3	0	0	3	4	1
LMOSA_14560	2	3	0	1	1	0	3	1	0	0	1	1	2	0	4	5	2	3	1	3	1	0	2	1	0	1	2	0	3	2	1	0	2	2	0	1	2	4	3	2	1	0	3	2	2	2	3	5	4
LMOSA_14570	255	155	144	203	227	178	301	213	154	239	194	219	343	257	278	352	518	294	199	128	212	159	217	399	243	302	229	311	172	306	173	477	180	228	204	284	476	228	360	422	419	235	301	429	248	255	332	509	373
LMOSA_14580	59	35	33	35	61	36	69	51	55	31	29	28	95	57	98	47	81	48	29	23	21	29	33	37	21	53	31	76	48	51	59	76	59	88	54	75	116	77	79	269	196	128	184	237	188	116	171	247	260
LMOSA_14590	69	55	50	53	52	44	75	55	46	64	40	45	79	81	115	74	157	81	61	33	59	48	75	131	60	112	85	67	30	68	53	63	46	76	52	89	98	67	62	203	156	96	164	213	122	112	151	215	173
LMOSA_1460	198	84	74	85	117	96	157	105	82	95	84	62	123	112	204	152	192	115	74	52	79	80	92	136	38	111	95	211	102	154	116	199	147	132	115	154	165	159	181	281	131	113	218	298	191	159	187	285	275
LMOSA_14600	40	28	28	35	44	22	30	28	35	27	28	25	39	33	49	36	67	33	37	24	53	25	54	58	19	60	48	40	23	48	24	38	34	25	24	47	64	35	77	109	89	67	62	95	48	51	55	86	60
LMOSA_14610	45	24	21	19	33	27	25	28	31	18	27	19	31	40	27	30	58	29	38	18	41	27	30	34	23	41	29	25	18	23	22	33	27	20	19	25	45	27	39	94	68	47	47	52	67	34	46	59	38
LMOSA_14620	112	71	86	105	128	132	110	103	107	48	114	97	95	77	121	45	177	100	82	60	102	76	128	194	85	180	119	153	77	144	76	113	132	96	91	140	196	151	193	300	289	158	237	279	131	163	186	276	225
LMOSA_14630	22	13	19	14	16	16	8	15	7	1	5	5	7	5	4	0	10	1	0	2	3	2	4	1	0	14	3	6	6	17	2	13	12	11	8	20	29	15	14	7	16	6	9	12	7	7	6	9	10
LMOSA_14640	13	2	13	10	15	10	18	15	9	6	12	12	12	5	10	18	12	7	10	5	9	12	14	17	10	26	8	17	4	13	5	22	5	7	5	16	13	14	6	21	5	12	16	13	14	5	10	23	20
LMOSA_14650	2	2	1	2	2	1	1	0	1	1	1	2	0	2	5	0	1	0	0	1	0	3	3	4	0	4	0	4	1	1	0	5	0	1	1	0	2	1	3	5	1	3	5	3	4	2	2	4	1
LMOSA_14660	0	1	1	2	0	3	0	1	1	2	1	1	0	1	1	0	3	1	0	0	1	1	2	3	2	7	2	2	0	0	1	0	0	1	1	0	4	0	2	1	5	2	2	3	3	2	3	3	1
LMOSA_14670	3	4	3	4	6	3	4	3	2	3	5	5	5	5	3	1	9	3	3	0	3	2	2	12	7	13	9	12	2	3	4	11	4	1	5	11	7	3	3	9	13	6	14	21	9	6	8	6	5
LMOSA_14680	0	1	3	1	4	2	4	1	2	1	1	5	1	4	2	5	7	5	0	0	3	4	5	6	2	19	8	6	6	1	0	2	2	2	1	7	7	5	4	4	4	3	10	13	6	3	5	6	4
LMOSA_14690	3	3	1	4	1	1	1	0	3	3	1	3	4	2	2	2	6	2	1	1	5	3	5	8	2	6	3	6	1	1	0	9	3	0	0	3	2	7	2	10	7	6	8	1	3	3	4	4	5
LMOSA_1470	31	86	10	31	68	42	31	31	34	69	39	51	26	26	29	109	22	36	23	26	17	17	14	9	23	16	43	4	20	21	32	18	9	53	22	22	39	21	20	22	73	20	16	45	82	35	45	24	35
LMOSA_14700	1	0	0	4	1	2	1	1	1	0	0	2	0	1	3	3	9	0	0	0	1	1	2	0	0	9	2	2	4	1	0	6	1	0	2	1	4	2	4	3	6	2	5	9	2	2	3	5	2
LMOSA_14710	2	1	4	7	6	6	3	3	8	4	0	4	4	4	10	0	11	2	5	5	4	6	7	19	6	14	3	11	6	4	2	10	7	1	4	8	12	14	13	23	9	15	25	24	10	7	20	19	25
LMOSA_14720	2	3	4	3	2	2	5	0	6	2	2	1	2	1	1	1	5	3	4	4	3	1	4	3	0	6	2	7	2	2	1	3	1	0	0	8	3	2	6	6	3	4	7	10	5	4	5	5	3
LMOSA_14730	3	6	7	7	8	3	6	2	4	3	6	2	4	3	6	5	6	7	4	2	11	10	0	5	5	14	1	1	1	6	3	9	1	1	5	10	5	8	10	24	8	2	15	13	16	2	15	17	11
LMOSA_14740	8	8	8	5	8	8	4	2	1	7	3	9	4	6	6	5	3	4	5	4	7	1	4	5	1	5	1	4	3	8	1	13	4	5	3	12	12	9	13	28	17	12	23	17	13	7	6	19	10
LMOSA_14741	0	0	2	2	1	1	1	1	0	1	0	0	0	1	0	0	0	0	1	0	0	0	1	3	0	0	0	0	1	1	1	1	0	1	2	0	2	0	2	2	1	0	2	0	0	0	3	3	2
LMOSA_14750	18	11	11	16	23	14	9	17	11	11	12	12	8	7	17	22	32	16	11	9	13	9	13	27	17	24	12	15	14	20	19	17	15	9	18	25	33	27	24	42	48	22	27	42	22	10	26	23	24
LMOSA_14760	0	0	0	0	1	1	0	0	1	0	0	0	0	0	0	1	1	2	0	1	0	0	0	2	0	0	1	0	2	0	0	1	1	0	1	1	1	0	0	0	1	0	0	0	2	0	0	0	0
LMOSA_14770	27	9	6	19	21	17	23	13	12	19	21	25	35	20	27	31	45	38	42	18	87	28	45	205	55	92	57	25	7	11	18	16	16	17	9	17	14	22	25	22	20	14	17	32	7	14	10	19	19
LMOSA_14780	17	11	13	9	8	15	16	8	15	17	21	14	25	11	23	14	22	16	11	9	47	19	26	108	49	61	34	10	6	16	11	15	13	11	6	10	14	11	19	11	22	4	13	14	18	13	7	23	23
LMOSA_14790	192	172	68	104	131	110	159	120	140	89	87	110	169	145	199	2	210	191	89	100	93	89	106	160	147	119	152	144	102	164	88	227	117	133	127	126	222	134	157	526	594	347	477	613	522	329	448	708	662
LMOSA_1480	2	1	5	2	3	0	2	1	2	4	2	2	4	3	2	6	4	2	3	3	5	5	3	3	4	3	4	2	4	2	4	5	4	1	2	4	5	6	4	9	2	3	8	7	1	0	2	9	5
LMOSA_14800	1	0	1	2	5	7	7	6	3	1	3	5	7	3	6	0	8	6	6	1	4	5	2	16	3	4	10	5	2	2	0	0	1	4	5	5	3	8	5	11	2	4	5	6	5	2	6	8	11
LMOSA_14810	5	6	1	15	10	8	8	11	13	9	12	5	13	9	12	1	17	5	8	6	14	7	10	11	9	14	6	6	10	6	7	12	9	4	5	15	21	6	11	35	21	25	17	23	17	9	19	29	21
LMOSA_14820	69	46	43	52	75	71	82	65	70	78	85	69	118	74	149	62	148	124	75	45	40	63	67	46	92	71	64	81	57	52	35	57	73	98	65	74	98	83	71	91	94	65	101	101	87	85	73	92	120
LMOSA_14830	157	76	60	71	97	95	165	98	100	98	104	92	180	124	212	130	233	130	81	38	78	68	91	144	138	116	115	217	98	129	108	169	89	115	93	151	164	141	123	149	87	65	140	132	113	100	141	181	228
LMOSA_14840	3	6	8	7	8	4	8	12	9	8	4	3	9	10	7	22	14	6	2	4	6	3	8	8	3	8	3	14	5	8	3	5	11	9	5	6	16	11	11	23	13	10	31	31	11	12	9	15	12
LMOSA_14850	203	138	116	165	188	187	271	230	280	188	270	192	327	305	469	344	561	339	319	286	381	302	382	499	199	525	408	349	199	304	211	327	262	298	310	357	518	371	466	1546	2614	1262	1466	1526	1005	859	1088	1320	1086
LMOSA_14860	57	33	41	43	48	36	52	39	31	26	27	32	43	44	56	96	66	37	23	16	33	19	19	52	19	40	31	55	54	39	35	42	47	54	43	67	83	79	94	140	102	89	109	140	71	73	82	127	98
LMOSA_14870	140	102	91	127	150	153	196	141	136	158	132	149	209	147	247	235	313	226	119	72	125	98	138	202	179	145	123	163	85	163	84	182	94	115	94	144	209	120	166	316	209	145	237	249	178	206	233	386	422
LMOSA_14880	1	0	0	3	2	0	4	2	2	4	2	1	1	3	3	3	4	1	4	0	1	2	1	10	3	9	10	2	4	3	7	2	2	1	2	0	1	3	1	1	3	1	2	3	1	1	5	0	3
LMOSA_14890	1	1	0	0	0	1	1	1	0	0	1	0	2	0	0	0	1	1	0	1	0	0	0	4	0	5	1	2	0	3	0	1	2	0	0	0	0	0	0	1	0	0	2	0	1	1	0	0	0
LMOSA_1490	0	1	0	2	0	0	1	2	0	0	0	0	2	0	3	1	2	2	2	1	1	0	2	0	1	4	0	5	0	4	1	3	3	2	2	0	4	0	0	3	2	0	0	2	1	2	1	0	0
LMOSA_14900	3	3	2	6	6	6	11	7	6	9	12	5	2	3	4	1	5	4	3	2	4	5	5	11	9	12	9	6	5	13	8	15	5	15	1	4	3	5	7	11	5	3	7	10	2	3	7	9	6
LMOSA_14910	5	1	1	0	4	9	3	8	6	6	6	5	4	6	6	7	7	5	4	7	11	9	10	20	5	16	15	8	1	12	2	6	10	5	3	5	4	8	5	8	11	5	3	9	5	3	6	17	5
LMOSA_14920	3	1	0	0	1	2	4	1	2	3	0	1	6	1	6	0	5	2	2	2	3	0	2	4	1	5	0	7	1	0	1	2	3	3	0	0	8	1	8	2	1	0	4	1	2	2	4	4	4
LMOSA_14930	28	11	7	17	23	15	18	12	13	21	16	14	12	11	21	4	22	15	11	8	8	12	12	23	15	22	20	34	23	21	15	40	8	16	9	21	28	28	17	32	16	25	25	8	18	22	23	23	33
LMOSA_14940	13	6	1	4	6	3	8	7	3	5	3	4	2	7	8	2	7	3	2	0	4	3	2	6	4	13	4	14	9	10	5	11	4	9	10	8	11	10	8	8	5	4	9	2	4	3	14	5	7
LMOSA_14950	47	32	32	25	36	28	40	31	31	29	20	32	39	22	29	140	46	37	12	11	17	15	28	32	29	25	22	36	20	34	18	39	27	27	25	36	40	26	38	53	51	46	33	57	36	22	29	60	41
LMOSA_14960	40	7	18	30	20	26	38	25	23	20	21	16	31	24	55	8	48	26	10	8	15	5	10	24	16	22	14	47	25	22	18	33	21	36	23	22	56	27	40	41	29	28	45	44	35	27	36	61	64
LMOSA_14970	0	1	0	0	4	0	4	1	3	2	5	5	4	5	3	1	7	3	3	1	0	1	2	6	0	6	1	4	6	0	3	9	1	4	1	1	0	3	3	6	7	6	11	10	3	2	3	7	6
LMOSA_14980	1	0	1	1	0	1	9	2	2	0	4	3	5	5	8	2	5	1	1	0	2	0	8	10	2	7	4	2	4	0	1	3	2	2	2	7	1	3	4	12	4	5	4	14	7	4	4	5	9
LMOSA_14990	93	61	64	48	66	58	123	88	77	97	61	73	107	72	121	154	152	61	46	17	43	37	34	69	50	44	54	102	91	123	45	163	84	77	86	79	146	89	98	145	121	96	124	96	126	71	94	211	133
LMOSA_150	0	0	1	2	2	2	1	0	0	0	0	1	1	0	2	0	1	0	1	0	2	0	0	1	0	0	0	2	0	3	0	0	3	1	1	2	7	1	0	2	1	0	1	0	0	1	3	3	1
LMOSA_1500	0	1	2	1	2	1	0	1	2	1	1	0	2	0	5	3	5	0	1	0	4	0	0	1	1	2	1	0	6	0	2	1	1	0	1	3	2	1	1	1	3	3	1	3	2	2	1	2	0
LMOSA_15000	30	38	34	30	39	42	36	39	22	27	22	33	30	16	15	47	55	24	18	11	29	26	40	39	14	45	22	34	18	39	13	69	29	13	15	35	35	32	38	57	54	38	42	57	24	37	36	72	30
LMOSA_15010	0	0	0	0	0	0	1	0	1	0	0	0	0	0	0	0	0	1	1	0	0	0	0	0	0	1	1	0	0	0	0	1	0	0	0	0	0	0	0	0	0	0	0	0	1	1	0	1	0
LMOSA_15020	74	56	58	64	59	51	27	33	38	11	32	24	36	28	47	55	64	25	3	2	2	8	0	5	9	9	4	30	15	29	23	30	29	78	46	99	138	90	118	265	272	91	155	154	72	62	52	92	85
LMOSA_15030	120	97	110	151	153	137	63	54	61	42	81	60	73	70	127	24	124	61	15	7	9	18	19	23	37	19	16	103	41	100	61	89	73	106	122	194	202	220	206	495	394	222	297	400	200	149	165	232	241
LMOSA_15040	279	190	302	371	549	437	188	176	196	127	199	150	181	182	256	9	301	215	37	20	67	72	67	99	150	96	53	196	122	292	110	287	188	187	221	358	386	349	378	723	505	474	540	688	380	225	293	487	358
LMOSA_15050	88	56	50	46	77	52	95	69	53	89	45	68	75	45	60	27	103	54	44	33	45	44	51	88	75	64	71	74	64	83	62	109	50	60	50	55	101	69	65	50	49	34	46	84	77	43	65	109	100
LMOSA_15060	10	5	2	11	6	8	17	8	5	12	10	10	20	9	19	23	9	7	6	2	11	4	10	12	4	4	10	7	6	8	2	11	10	5	10	11	9	13	13	23	21	18	7	16	15	7	12	23	22
LMOSA_15070	107	83	68	31	50	78	54	35	35	43	43	50	63	96	98	3	81	66	48	26	67	31	98	85	86	73	72	29	22	59	33	39	34	40	65	68	78	41	86	112	52	47	69	98	59	75	97	171	158
LMOSA_15080	7	4	3	0	5	5	11	4	4	1	4	2	6	4	5	2	6	4	2	3	5	3	5	15	6	9	9	10	6	8	4	12	11	13	2	2	11	9	9	16	7	9	11	14	5	6	9	19	15
LMOSA_15090	28	10	22	22	17	14	27	16	17	10	8	13	29	22	38	17	35	12	16	6	7	14	7	21	8	17	10	40	13	30	24	47	26	34	24	39	47	38	36	60	29	34	27	42	35	23	30	40	35
LMOSA_1510	1	0	1	0	0	0	1	0	2	1	0	0	1	0	0	2	0	1	0	2	1	0	0	0	0	2	0	0	0	0	1	0	1	1	0	1	1	1	2	2	0	3	3	0	1	2	3	2	3
LMOSA_15100	50	36	30	39	32	29	59	33	24	31	24	28	62	47	67	24	85	27	35	25	41	28	23	55	21	49	33	87	52	58	45	69	45	53	39	61	62	77	82	112	52	72	89	87	64	62	58	92	85
LMOSA_15110	103	74	47	65	115	80	137	95	71	101	80	79	82	74	102	71	152	75	66	43	76	57	81	119	84	127	67	169	96	129	94	127	83	84	70	125	131	86	122	118	71	72	97	109	76	67	68	119	126
LMOSA_15120	41	30	32	23	31	37	46	42	33	43	35	53	43	31	31	7	52	29	30	18	28	19	14	30	30	17	27	9	24	29	15	24	15	22	15	27	30	17	29	24	18	25	19	26	29	17	17	47	20
LMOSA_15130	512	229	284	335	345	294	518	392	379	351	357	302	534	379	702	36	907	583	320	228	342	291	461	605	457	490	372	772	390	567	371	653	392	528	338	707	688	562	539	906	532	481	807	850	484	537	601	841	835
LMOSA_15140	5	3	3	5	9	7	10	6	5	6	7	5	4	4	3	5	2	7	1	3	1	5	1	9	2	9	4	5	4	13	3	2	2	6	1	5	4	4	4	8	8	3	6	6	4	4	5	3	6
LMOSA_15150	33	10	14	11	19	14	39	50	34	25	31	26	23	13	17	8	33	15	18	13	16	13	19	18	16	31	10	37	8	38	23	32	34	16	13	26	25	29	24	22	26	13	15	17	9	9	20	28	9
LMOSA_15160	50	21	27	32	34	28	66	73	58	55	78	68	36	46	53	12	73	53	43	44	63	50	70	77	45	90	70	52	39	51	35	51	46	41	41	49	59	67	74	45	36	24	37	37	26	23	26	55	35
LMOSA_15170	0	0	0	0	0	0	2	0	0	2	0	1	0	1	0	2	0	1	1	0	1	1	1	2	0	0	0	0	0	0	1	2	0	1	0	0	1	2	0	0	0	0	1	0	0	0	0	4	0
LMOSA_15180	7	5	3	2	4	2	5	5	1	1	2	1	3	4	8	9	8	5	1	1	5	1	0	8	7	10	11	6	1	8	2	5	0	1	4	8	6	6	3	3	9	7	2	3	6	5	5	5	4
LMOSA_15190	2	2	1	1	1	1	0	1	3	4	0	1	6	2	3	2	4	1	0	1	6	2	8	5	2	4	3	2	2	3	0	1	0	4	1	4	2	6	2	10	2	6	6	5	2	8	3	3	2
LMOSA_1520	4	0	0	0	2	1	0	0	0	0	1	0	0	0	3	14	1	1	1	0	2	0	1	0	2	5	1	0	2	1	0	1	0	1	0	0	3	1	2	0	3	0	2	2	1	1	1	3	4
LMOSA_15200	17	13	14	14	9	20	27	18	17	18	20	26	29	25	34	4	24	27	12	5	28	15	21	37	10	34	23	18	14	30	19	20	25	21	12	22	34	21	23	46	59	28	44	45	32	27	43	58	59
LMOSA_15210	1	0	0	0	0	0	2	1	0	1	2	0	0	1	2	1	1	3	1	0	1	1	1	1	1	1	0	0	1	0	2	3	2	1	0	0	0	1	1	1	4	3	0	2	1	1	1	4	1
LMOSA_15220	7	1	1	1	2	2	1	2	0	1	1	2	1	1	4	4	2	3	2	0	1	2	5	2	3	3	1	2	1	2	1	3	1	2	1	1	4	4	1	6	1	3	3	0	3	0	2	4	10
LMOSA_15230	2	1	2	2	0	0	1	1	2	1	3	6	1	2	3	1	3	2	0	0	1	0	1	1	2	1	2	0	0	3	1	1	2	1	0	0	3	1	3	3	1	1	3	1	1	3	1	3	2
LMOSA_15240	6	7	9	4	10	11	14	8	14	11	11	13	24	29	24	22	23	19	13	7	21	6	6	17	11	9	17	11	4	8	4	20	2	12	7	14	10	13	16	34	38	19	21	29	20	11	16	33	26
LMOSA_15250	24	14	6	14	14	17	22	15	17	22	11	15	31	20	28	19	19	31	19	8	25	11	8	20	16	10	13	12	8	18	12	29	5	20	16	30	25	13	27	34	45	22	28	40	40	18	37	61	34
LMOSA_15260	137	95	83	113	132	109	169	117	106	128	109	83	137	116	155	21	160	134	76	51	54	77	99	144	163	114	120	152	78	136	74	110	99	109	96	125	127	110	125	132	91	65	111	138	94	84	130	159	182
LMOSA_15270	409	264	199	331	362	312	348	293	259	231	284	176	300	232	448	192	512	319	178	98	158	156	245	363	153	290	243	585	265	502	305	480	356	413	282	409	499	431	416	556	488	256	468	455	248	287	366	466	470
LMOSA_15280	148	65	79	82	107	93	143	107	78	73	80	75	170	115	172	63	169	117	65	34	36	53	77	119	77	95	80	225	105	137	104	174	90	124	73	127	135	122	130	143	68	60	89	108	69	85	101	134	163
LMOSA_15290	17	12	10	17	17	13	14	14	7	9	8	8	2	6	12	3	22	5	2	4	10	7	18	26	19	21	15	12	12	13	11	21	14	15	7	6	22	11	24	30	18	20	12	17	13	8	3	22	9
LMOSA_1530	3	2	2	1	6	3	4	8	5	4	4	7	8	6	9	1	12	8	6	1	10	4	7	15	7	16	10	4	1	1	3	4	6	2	4	5	2	6	3	14	12	9	8	13	4	6	11	32	11
LMOSA_15300	35	17	14	31	29	20	35	21	28	34	24	30	32	14	42	5	40	42	18	11	8	16	14	20	18	27	20	42	24	31	23	66	28	38	27	37	50	38	39	24	13	7	23	22	18	12	16	14	21
LMOSA_15310	68	49	35	59	54	42	97	60	46	43	67	46	69	38	78	6	119	73	28	13	30	35	36	57	72	37	30	103	40	71	50	84	51	90	42	61	110	63	67	42	61	24	39	63	41	29	34	41	64
LMOSA_15320	1	2	2	2	0	0	2	2	1	1	2	1	1	5	4	7	5	1	2	1	3	1	3	1	4	1	3	2	7	4	4	3	1	1	2	4	3	2	6	6	3	1	6	0	1	7	6	5	6
LMOSA_15330	0	1	0	0	1	0	0	1	1	0	0	0	0	0	2	1	0	1	0	0	0	1	0	0	0	0	0	0	0	0	0	0	0	0	3	0	0	0	0	1	1	0	1	0	0	1	0	1	0
LMOSA_15340	1	1	1	0	0	0	0	1	0	0	0	1	0	0	1	1	0	0	0	0	0	0	1	6	0	1	0	1	0	1	1	1	1	0	1	0	0	1	0	2	1	0	1	4	0	0	1	1	0
LMOSA_15350	1	0	0	0	1	1	0	0	0	0	1	0	0	0	3	1	0	1	2	1	1	1	1	0	0	0	0	0	4	1	1	0	0	1	1	0	1	2	0	3	2	1	0	1	1	1	1	0	3
LMOSA_15360	2	0	0	0	1	2	1	2	4	1	1	0	3	0	2	1	14	2	3	0	2	4	0	5	2	3	1	3	1	1	1	5	0	1	0	4	5	4	1	8	4	6	13	6	3	2	1	9	2
LMOSA_15370	0	1	1	2	4	7	3	4	6	4	3	3	4	0	1	4	6	5	3	4	6	1	5	2	5	6	2	0	1	5	1	9	3	3	1	3	3	1	4	7	6	2	2	4	5	2	3	6	1
LMOSA_15380	1	0	0	1	0	0	0	1	1	0	0	0	2	0	0	5	0	1	0	1	1	0	0	0	0	0	1	0	1	1	0	0	0	0	0	1	0	0	0	4	2	0	0	0	0	0	1	4	1
LMOSA_15390	0	0	0	0	1	0	0	0	1	0	0	1	0	0	1	1	0	0	0	0	1	0	0	0	0	1	0	3	0	0	1	0	0	0	0	1	0	0	0	0	1	0	0	1	0	1	0	2	1
LMOSA_1540	3	4	0	3	3	3	3	9	3	1	2	4	11	1	3	3	3	5	3	3	2	2	3	6	1	8	0	7	0	3	1	11	2	4	5	1	1	4	1	4	1	5	6	2	0	6	4	10	3
LMOSA_15400	112	70	73	48	94	70	50	71	65	41	32	47	62	72	98	1	121	91	137	88	182	96	99	177	40	165	126	73	50	148	47	213	116	86	72	112	187	93	182	259	297	245	220	262	195	187	258	665	202
LMOSA_15410	2	4	2	4	2	7	3	4	1	4	3	6	3	7	1	0	3	3	8	13	9	6	3	9	1	1	6	1	4	4	0	1	3	1	7	7	8	4	2	3	10	1	5	5	10	3	4	19	7
LMOSA_15420	6	4	5	2	2	4	4	5	2	1	3	2	1	4	7	2	4	0	5	3	2	6	1	6	1	6	0	6	5	5	5	10	4	6	6	4	7	6	8	18	8	9	13	15	7	8	4	5	10
LMOSA_15430	45	28	26	26	44	24	51	39	50	28	32	53	63	53	51	43	102	41	42	26	70	39	56	86	53	77	38	52	35	55	23	71	41	40	29	62	73	61	89	105	58	72	91	88	62	60	72	116	112
LMOSA_15440	12	6	10	21	28	24	27	24	34	15	31	28	24	26	91	25	64	39	35	18	32	40	38	40	42	47	27	16	9	21	15	21	16	18	19	25	51	26	33	57	47	47	56	96	70	41	50	79	45
LMOSA_15450	20	8	13	10	11	6	27	15	16	13	10	14	24	20	22	12	17	16	11	4	4	5	8	4	15	7	12	17	10	20	15	7	14	15	8	14	10	20	15	35	22	16	26	44	20	17	13	36	29
LMOSA_15460	3	4	1	5	4	4	3	1	1	3	5	5	6	4	8	3	6	8	1	2	7	5	3	2	4	5	4	6	2	4	4	0	4	6	1	8	8	5	8	5	9	5	6	4	9	2	6	9	4
LMOSA_15470	47	37	30	38	57	38	64	48	52	30	50	55	54	33	49	38	87	36	28	14	41	30	63	105	39	101	42	65	40	53	37	66	41	43	51	57	95	56	79	94	72	51	66	81	30	50	58	85	76
LMOSA_15480	1	0	2	2	1	1	0	0	2	2	0	2	4	1	4	4	3	2	0	0	2	1	4	3	5	8	2	0	1	4	0	3	2	2	3	1	0	3	6	6	3	0	6	3	0	0	1	5	3
LMOSA_15490	7	4	6	7	10	5	11	8	9	7	12	5	8	8	7	2	9	6	6	4	1	1	9	9	10	8	5	24	11	13	11	9	9	7	0	6	17	8	6	20	6	9	6	15	5	3	16	9	8
LMOSA_1550	13	5	2	1	4	7	3	9	7	4	5	6	4	5	5	15	6	5	3	3	4	2	4	8	2	1	0	5	6	12	1	2	3	6	12	10	8	5	10	19	13	8	7	11	7	6	11	10	12
LMOSA_15500	432	444	377	351	544	451	751	559	487	833	504	778	657	513	662	448	557	673	411	282	510	377	444	726	573	576	612	199	228	366	197	431	175	366	185	246	465	217	275	155	194	91	158	163	170	158	213	420	320
LMOSA_15510	37	20	9	15	19	20	30	16	23	11	15	15	15	19	28	19	22	21	11	2	8	5	6	13	10	7	10	37	11	30	16	35	10	15	25	17	37	13	28	76	80	53	60	77	57	47	46	83	72
LMOSA_15520	61	60	21	33	46	26	55	55	40	42	24	38	71	48	79	29	85	68	41	22	38	29	32	30	35	40	54	97	45	58	66	70	40	56	42	62	79	51	58	213	278	134	203	224	158	118	134	170	186
LMOSA_15530	294	177	132	202	245	194	255	217	167	135	126	141	274	197	351	89	390	173	103	73	136	125	119	263	107	209	120	640	255	399	257	413	247	297	252	373	415	308	425	928	694	524	800	867	559	512	529	713	856
LMOSA_15540	26	21	10	27	30	24	44	28	24	24	23	29	41	24	46	3	65	39	23	10	31	19	33	53	24	41	39	52	20	30	31	57	28	15	14	37	25	26	38	44	30	30	31	45	27	42	32	48	39
LMOSA_15550	2	3	1	7	5	5	11	2	6	5	6	8	14	9	13	3	9	6	6	3	11	4	6	10	6	10	4	5	6	3	4	5	1	11	7	10	6	6	9	16	3	7	9	10	7	9	3	11	10
LMOSA_15560	226	117	130	151	169	150	304	213	203	192	223	201	307	265	463	443	605	349	287	154	280	213	354	540	250	402	358	259	164	214	108	224	191	275	197	320	360	301	343	642	421	264	498	558	305	329	463	540	470
LMOSA_15570	281	282	80	107	192	145	192	175	145	259	136	174	162	161	230	58	163	274	177	161	111	149	97	95	169	70	150	48	97	100	134	112	59	121	149	111	105	72	91	112	167	94	115	179	274	103	164	207	188
LMOSA_15580	8	4	5	5	5	3	9	8	4	3	5	4	12	9	21	2	13	11	6	4	7	3	7	5	8	8	6	9	7	8	6	9	10	7	8	10	10	15	10	57	55	36	66	48	52	31	35	52	36
LMOSA_15590	16	13	9	7	8	15	13	23	18	17	17	17	17	15	11	8	14	6	9	2	11	9	8	19	8	8	3	10	2	20	7	33	16	12	16	9	35	22	27	46	34	23	40	44	18	12	16	17	15
LMOSA_1560	11	2	6	5	3	4	4	5	7	8	8	5	7	9	5	23	9	13	4	5	4	7	3	7	7	6	9	7	5	14	2	9	6	7	1	5	13	6	11	18	10	7	7	11	9	4	10	44	20
LMOSA_15600	28	11	12	15	12	19	18	14	13	18	16	16	19	22	25	7	26	28	18	7	24	17	14	26	19	18	19	15	6	28	14	27	16	26	18	8	25	22	20	28	31	12	26	22	21	16	22	18	17
LMOSA_15610	17	20	9	23	23	9	24	18	17	10	12	27	17	16	19	6	38	25	23	22	26	28	25	49	29	41	29	22	16	20	6	26	18	12	10	16	34	22	26	23	27	22	15	33	15	12	4	28	20
LMOSA_15611	2	0	0	0	1	0	1	1	0	1	0	1	0	1	0	0	0	0	0	1	1	1	1	6	1	0	1	0	0	0	1	0	0	0	0	0	0	0	1	1	0	0	0	1	0	1	0	1	0
LMOSA_15620	2	4	1	3	3	1	3	2	1	3	0	1	1	0	1	0	2	2	1	0	0	0	0	1	0	0	3	0	3	2	0	3	1	2	3	0	0	0	2	1	1	0	0	1	0	2	2	1	3
LMOSA_15630	0	0	0	0	0	0	0	0	0	0	1	0	0	0	0	0	0	1	0	0	0	0	1	3	1	0	0	0	0	0	2	0	0	0	0	0	0	0	1	1	1	0	0	0	0	0	1	0	0
LMOSA_15640	26	25	27	15	34	11	29	20	24	25	17	24	25	19	38	0	28	11	13	3	7	13	14	17	10	29	18	33	21	30	21	48	27	19	20	24	51	22	32	51	39	28	41	33	22	21	38	48	52
LMOSA_15650	111	60	52	68	75	57	94	51	61	55	54	44	74	65	85	0	104	72	41	22	51	41	53	107	52	101	72	158	68	115	78	81	65	100	71	104	144	103	126	216	160	97	137	194	116	100	114	154	169
LMOSA_15660	3	4	3	4	3	2	2	4	1	1	3	4	2	5	3	2	3	2	3	1	3	1	0	0	0	1	0	3	3	2	0	1	2	2	0	2	0	4	1	3	1	2	3	1	6	1	3	7	2
LMOSA_15670	49	34	35	42	30	25	64	69	57	31	59	47	47	39	59	48	93	47	48	34	60	55	108	191	70	154	107	73	43	58	25	54	34	32	25	54	67	70	71	95	81	43	85	88	43	48	49	106	64
LMOSA_15680	40	29	21	21	34	37	39	31	48	34	35	35	40	27	53	84	72	31	44	20	53	47	61	150	49	111	58	43	17	34	17	48	28	36	25	43	64	56	48	89	50	49	50	64	32	54	39	101	58
LMOSA_15690	6	13	5	8	17	23	14	7	10	12	6	9	14	7	6	2	7	7	9	2	10	8	7	3	2	10	3	7	7	2	3	6	10	5	14	9	6	12	6	10	7	9	7	12	14	9	5	12	9
LMOSA_1570	15	14	12	15	9	15	17	14	22	16	11	19	26	26	20	62	22	15	21	8	26	23	8	30	8	24	12	16	8	30	9	22	19	8	12	16	31	15	18	37	31	36	36	42	25	20	27	54	31
LMOSA_15700	1	0	1	1	0	4	4	2	1	3	2	5	1	1	0	4	7	6	4	3	4	7	5	3	2	10	8	5	2	3	2	11	3	1	1	4	3	3	3	3	9	5	4	14	4	3	1	9	5
LMOSA_15710	1	2	3	5	0	2	2	2	3	4	1	2	2	1	2	0	4	0	0	0	1	4	4	2	1	3	4	3	1	0	4	5	1	1	1	3	2	1	2	3	3	1	0	5	1	1	1	5	1
LMOSA_15720	6	10	9	6	2	3	12	13	5	10	14	10	5	4	9	19	11	6	14	10	20	14	21	19	22	27	9	26	4	12	3	22	10	15	9	11	20	15	11	18	17	18	18	16	12	16	14	31	9
LMOSA_15730	12	2	5	13	7	11	7	5	9	7	12	16	6	6	15	10	9	4	11	9	15	10	18	22	20	27	13	22	6	15	9	10	11	19	18	25	14	16	15	28	8	9	16	27	9	11	8	20	25
LMOSA_15740	1	0	1	1	0	0	2	3	2	1	1	2	1	0	3	2	1	2	0	1	0	0	0	0	0	0	1	3	3	2	0	2	2	1	0	3	2	2	2	3	0	1	0	2	1	0	2	2	2
LMOSA_15750	27	17	13	15	15	18	16	12	12	17	18	10	20	18	23	72	27	11	19	7	8	10	11	13	18	18	8	39	15	16	19	33	20	24	15	17	26	18	30	38	33	27	35	28	25	29	30	43	52
LMOSA_15760	2	1	2	1	1	0	1	0	1	1	2	1	1	2	0	1	0	2	0	0	0	0	0	0	2	0	1	0	1	0	0	0	3	2	2	0	0	0	0	2	1	1	0	1	0	4	2	2	1
LMOSA_15770	12	7	3	6	3	5	6	8	5	1	7	7	6	9	17	9	9	9	4	6	13	6	6	14	9	13	13	7	10	11	5	16	9	3	2	15	14	4	8	14	13	4	1	13	4	6	13	24	13
LMOSA_15780	0	0	0	0	0	0	0	0	1	0	0	1	0	0	0	0	0	0	0	0	0	0	0	1	0	0	1	0	0	0	0	1	0	0	0	0	0	0	0	0	1	0	0	0	0	0	0	1	0
LMOSA_15790	2	1	0	0	1	0	0	1	1	2	0	2	0	0	3	2	0	3	0	0	0	0	0	0	0	1	0	1	0	0	0	0	0	2	0	1	2	0	1	0	1	1	0	1	0	2	1	1	1
LMOSA_1580	1	0	0	0	0	3	1	0	2	0	0	1	1	1	0	3	1	0	0	3	1	0	1	1	0	2	0	0	1	0	0	0	0	3	0	0	0	1	0	1	0	3	0	2	0	0	1	2	2
LMOSA_15800	24	20	12	22	23	26	27	42	20	24	30	33	27	33	53	30	88	35	25	20	34	35	39	55	46	50	41	53	29	73	21	75	30	40	35	30	68	43	43	87	130	89	96	82	67	56	61	87	79
LMOSA_15810	0	1	0	1	0	0	1	0	0	0	0	0	0	0	1	1	1	0	1	0	0	0	0	0	1	0	0	0	0	0	1	0	0	0	0	0	1	0	0	1	1	2	0	0	0	0	1	0	1
LMOSA_15820	3	0	2	1	0	0	0	0	0	0	1	0	0	1	1	3	0	0	0	0	1	1	1	3	0	1	0	0	0	3	0	0	1	4	0	1	0	1	1	0	1	0	2	1	2	1	1	0	1
LMOSA_15830	0	0	0	1	0	0	0	0	0	0	0	0	0	0	0	0	0	0	0	0	0	0	0	0	0	0	1	0	0	0	0	0	2	0	0	0	0	0	0	0	0	0	0	1	0	0	0	2	0
LMOSA_15840	1	0	0	0	0	0	0	0	0	0	0	1	0	0	0	0	0	0	0	0	0	0	0	0	0	0	0	0	0	0	0	0	0	1	0	0	0	0	0	0	0	0	0	0	0	0	0	0	0
LMOSA_15850	0	0	0	0	0	0	0	0	0	0	0	1	0	0	0	0	0	0	0	0	0	0	0	0	0	1	0	0	0	0	0	0	0	0	0	0	0	0	0	0	0	1	0	0	0	0	0	0	0
LMOSA_15860	0	0	0	0	0	0	0	0	0	0	0	0	0	1	0	0	0	1	0	0	1	0	0	0	0	0	1	0	0	0	0	0	0	0	0	2	1	0	1	1	0	0	1	4	0	0	0	0	0
LMOSA_15870	0	0	0	0	1	1	0	0	0	1	2	0	2	0	0	0	3	0	0	0	0	0	0	0	0	0	1	0	2	1	0	1	0	1	2	0	0	2	4	0	0	0	1	1	1	1	1	0	0
LMOSA_15880	3	1	2	0	4	2	2	1	2	4	0	2	2	4	4	1	6	4	2	0	0	1	4	2	1	1	0	1	1	6	4	3	0	2	3	3	5	1	1	0	3	1	0	4	2	1	0	0	4
LMOSA_15890	1	0	0	0	0	0	0	0	0	0	0	1	0	0	0	0	1	0	0	0	0	0	0	0	0	0	0	0	1	1	0	0	0	0	0	0	0	0	0	0	0	0	0	0	0	0	0	0	0
LMOSA_1590	2	0	0	0	0	0	0	0	0	0	1	0	0	1	1	1	1	0	2	0	3	0	2	2	0	3	1	0	0	0	0	0	0	0	0	0	1	1	1	0	1	0	0	0	1	1	0	1	0
LMOSA_15900	0	2	0	0	0	0	0	0	0	0	0	0	2	0	0	1	0	0	0	0	0	0	0	0	0	0	0	0	0	0	0	0	0	0	0	0	0	0	0	0	0	0	0	0	0	0	0	0	0
LMOSA_15910	0	0	1	0	0	2	0	1	3	1	0	1	3	1	1	2	3	0	3	1	2	1	0	1	1	1	1	0	1	0	0	0	0	0	2	2	1	0	2	1	0	0	2	1	0	0	0	1	0
LMOSA_15920	0	1	0	0	0	2	3	2	0	0	2	0	4	1	2	1	7	1	1	2	0	3	1	0	1	2	3	1	2	0	0	4	0	0	2	0	1	0	6	0	0	0	1	0	1	0	1	1	1
LMOSA_15930	1	1	1	0	1	0	0	0	0	0	0	0	1	0	4	2	0	3	0	0	0	1	0	0	0	2	0	2	0	1	3	0	0	0	0	0	1	1	0	0	0	0	0	2	0	0	0	0	0
LMOSA_15940	7	2	2	1	3	2	3	0	3	2	0	0	2	2	3	2	6	1	1	0	1	2	1	3	1	10	4	7	2	2	1	1	4	3	1	1	5	0	2	3	2	1	2	0	1	3	3	5	3
LMOSA_15950	2	0	1	0	0	2	0	0	2	0	2	1	1	0	3	0	0	0	0	0	2	1	1	0	2	2	0	5	0	0	4	0	0	1	0	0	0	0	1	3	0	1	1	0	0	2	0	3	4
LMOSA_15960	1	2	0	4	4	2	5	3	5	2	4	3	4	2	6	2	5	3	3	3	1	3	0	7	4	5	6	6	0	0	0	4	0	1	1	4	1	1	2	3	3	6	5	5	4	1	4	6	2
LMOSA_15970	0	0	0	0	0	0	0	0	0	0	0	0	0	1	0	0	0	0	0	0	0	0	0	0	0	0	0	0	0	0	0	0	0	0	0	0	0	2	0	0	0	0	0	0	0	0	0	0	0
LMOSA_15980	1	0	0	0	2	1	0	0	2	0	0	1	1	0	2	0	0	2	1	0	0	0	2	2	2	3	1	0	3	0	1	2	0	2	1	0	0	0	0	0	1	1	2	1	0	1	1	6	1
LMOSA_15990	0	0	0	0	0	0	1	0	0	0	0	0	0	1	0	0	1	1	0	0	0	0	0	0	0	0	0	0	1	0	0	1	0	0	0	0	0	0	0	1	1	0	0	1	0	0	0	0	0
LMOSA_160	191	116	86	118	148	122	130	103	81	53	77	86	167	112	158	149	166	97	58	46	110	85	98	182	71	91	52	168	92	145	105	162	89	142	113	144	206	125	163	169	153	99	118	128	105	84	117	136	173
LMOSA_1600	0	0	0	0	0	1	0	0	0	1	0	0	1	0	0	0	1	1	0	0	0	0	0	0	0	0	0	2	0	0	0	0	0	1	0	0	1	1	0	0	0	1	0	0	0	0	1	1	1
LMOSA_16000	0	0	0	0	0	0	1	0	1	1	0	0	0	0	0	0	2	0	0	0	1	0	0	0	0	1	0	0	0	0	0	0	0	1	0	0	1	0	0	0	0	0	0	2	0	0	0	0	0
LMOSA_16010	0	0	0	1	0	0	0	0	2	0	1	0	0	0	0	1	0	0	1	0	0	1	0	0	1	2	0	2	0	1	0	0	0	0	0	1	1	1	0	2	2	3	0	1	0	1	2	1	1
LMOSA_16020	0	0	0	0	0	0	0	0	0	0	1	0	0	0	0	1	0	0	0	0	0	0	0	0	0	0	0	0	0	0	0	0	0	0	0	0	0	0	0	0	0	0	0	1	0	0	0	0	0
LMOSA_16030	0	0	0	3	1	1	1	0	1	0	0	0	1	1	2	2	2	0	1	0	0	0	0	0	1	1	0	1	1	1	0	0	0	0	0	2	0	1	0	0	0	4	3	3	0	0	1	0	0
LMOSA_16040	0	0	1	0	0	0	0	0	0	0	0	0	1	0	0	0	1	0	0	0	1	0	0	0	0	0	0	0	0	0	0	0	0	0	0	0	2	0	0	1	0	0	0	0	0	0	1	0	0
LMOSA_16050	0	0	0	0	0	0	0	0	0	0	0	3	0	2	1	0	0	0	0	0	1	2	0	0	0	0	0	0	1	0	0	0	0	1	0	0	0	0	0	2	4	0	1	1	0	0	0	0	1
LMOSA_16060	1	0	0	0	2	0	0	0	0	0	0	0	0	0	1	1	1	0	0	0	0	0	0	1	0	1	0	0	1	2	0	0	1	0	1	0	0	2	1	1	1	1	3	1	0	0	0	2	0
LMOSA_16070	2	0	1	0	0	0	0	1	0	0	0	2	2	0	1	0	3	1	0	0	1	0	0	0	1	1	1	2	0	0	1	1	0	0	0	2	0	0	0	2	1	0	3	4	1	2	2	0	0
LMOSA_16080	0	3	1	0	1	1	2	0	0	1	0	0	0	0	0	0	3	0	0	0	0	0	0	0	1	0	0	1	1	1	0	0	0	0	0	0	0	2	0	0	0	0	0	1	0	0	0	0	0
LMOSA_16090	0	1	0	0	0	1	0	0	1	0	0	0	0	0	0	0	0	0	0	0	0	0	1	1	0	1	0	0	0	0	0	0	0	0	1	0	0	0	0	0	0	1	1	1	0	1	1	0	0
LMOSA_1610	0	0	1	1	0	0	1	0	0	0	1	0	0	0	0	0	2	0	0	0	0	0	1	0	1	2	1	0	0	0	0	2	0	1	0	3	0	0	1	0	0	0	0	0	0	0	0	0	0
LMOSA_16100	1	0	0	0	0	0	1	0	0	0	0	0	0	0	0	0	0	0	0	0	0	0	0	1	0	0	0	0	0	0	0	0	0	0	0	0	0	0	0	1	1	0	0	1	0	1	1	0	1
LMOSA_16110	1	0	0	0	1	0	0	1	0	0	0	2	0	0	3	1	0	0	1	0	1	1	0	0	0	1	0	0	0	0	0	0	1	1	0	0	0	2	0	2	1	0	1	1	0	0	0	0	0
LMOSA_16120	0	0	0	0	0	0	1	0	0	0	0	0	0	1	0	1	0	0	0	0	0	1	0	1	0	0	0	0	0	0	0	0	1	2	0	1	0	0	0	3	0	1	0	3	0	0	0	0	0
LMOSA_16130	0	0	1	0	0	0	1	1	0	0	0	1	1	2	1	0	1	1	0	0	0	0	0	0	0	0	0	0	0	0	0	0	1	3	0	0	1	0	1	3	1	4	0	0	0	1	0	1	0
LMOSA_16140	1	0	0	0	0	0	0	0	0	0	0	1	4	0	0	0	1	0	0	0	0	0	0	0	0	0	0	0	0	0	3	0	0	1	0	0	0	0	1	0	2	1	0	0	0	0	0	0	0
LMOSA_16150	1	0	0	3	1	2	2	0	3	0	2	1	0	0	3	1	2	0	1	0	0	0	2	0	0	1	0	1	0	2	0	2	1	2	1	0	1	0	2	1	0	1	1	1	1	1	0	0	0
LMOSA_16160	1	3	0	0	0	0	0	0	1	0	0	0	1	1	2	0	2	0	0	0	1	0	0	0	0	1	0	0	1	0	0	0	1	1	0	1	1	0	0	0	0	1	1	0	0	0	0	2	2
LMOSA_16170	0	0	0	1	0	0	1	0	1	0	1	0	0	0	1	1	0	0	0	0	0	0	0	0	0	0	0	3	1	0	0	0	0	0	0	0	0	0	3	3	0	0	0	0	0	0	0	0	0
LMOSA_16180	0	0	2	2	4	0	1	0	1	1	2	0	3	1	1	2	5	0	0	0	0	0	2	1	0	0	0	2	0	2	0	4	0	1	0	2	1	7	0	5	6	6	6	4	1	8	3	6	2
LMOSA_16190	2	0	0	0	1	1	0	1	1	1	3	0	0	1	2	0	0	2	0	0	0	0	1	0	0	2	0	1	1	1	3	2	2	0	0	4	2	3	0	1	0	1	3	3	1	2	0	1	0
LMOSA_1620	175	77	103	103	121	80	161	89	80	61	74	63	204	144	238	112	294	158	113	56	109	99	116	201	118	158	133	205	90	139	112	166	95	153	135	227	203	206	262	333	235	161	304	302	165	187	230	322	390
LMOSA_16200	0	0	0	2	1	1	1	0	3	1	2	1	0	2	4	0	2	0	3	1	2	2	1	0	0	0	1	2	0	3	2	2	3	2	1	0	4	1	0	5	0	0	0	6	1	2	1	1	0
LMOSA_16210	1	0	1	0	0	0	1	0	0	0	0	0	0	0	1	1	2	2	0	0	0	0	0	6	0	1	1	2	1	3	2	2	0	0	2	0	0	2	5	1	2	1	2	1	0	3	1	5	2
LMOSA_16220	0	3	0	0	0	0	1	0	0	0	0	2	1	2	2	0	2	1	0	1	0	0	0	0	0	0	0	0	1	0	1	1	1	1	1	0	0	0	0	1	0	0	1	0	0	2	0	0	0
LMOSA_16230	0	1	0	0	0	0	3	1	2	0	2	1	1	2	1	1	2	1	0	0	0	3	1	0	0	1	0	2	1	0	0	1	0	0	1	1	0	0	1	0	1	1	2	1	0	1	1	1	3
LMOSA_16240	30	22	21	10	22	5	12	10	10	15	15	14	30	21	30	19	36	26	11	12	10	4	22	23	17	19	23	10	16	15	11	30	16	16	18	16	19	19	10	26	32	17	27	28	23	15	35	24	17
LMOSA_16250	9	2	4	12	12	11	6	7	7	10	3	7	7	14	10	6	16	10	6	3	4	8	6	10	8	10	7	9	6	9	6	9	5	7	9	7	8	4	5	10	10	5	1	9	3	2	5	14	15
LMOSA_16260	37	29	14	39	43	37	61	50	36	50	41	37	70	39	65	223	68	41	37	20	47	40	52	79	32	58	36	57	29	58	33	61	37	30	30	45	68	42	57	41	31	25	31	30	28	49	27	66	55
LMOSA_16270	107	51	57	83	86	56	126	87	77	78	83	91	90	57	121	88	176	62	83	40	73	52	88	133	67	140	78	199	124	129	98	188	118	95	91	149	173	139	156	272	169	169	274	263	138	212	192	254	245
LMOSA_16280	12	4	8	12	11	8	8	10	4	7	2	8	10	10	12	2	28	9	7	5	8	7	11	15	9	10	9	18	17	15	10	13	12	13	5	21	14	11	18	41	32	18	27	31	13	12	22	32	33
LMOSA_16290	6	4	4	8	8	5	10	9	8	5	5	11	17	4	12	2	24	5	6	5	9	6	15	23	10	16	5	21	5	21	10	15	7	16	6	17	9	5	8	14	15	15	20	15	7	6	17	15	15
LMOSA_1630	33	15	21	15	11	6	15	19	13	6	8	4	10	11	11	6	8	4	7	3	6	1	1	7	8	7	5	12	10	28	10	20	11	12	16	12	15	12	11	31	16	18	27	10	17	13	19	39	48
LMOSA_16300	10	11	9	9	13	14	12	8	5	19	14	9	5	7	8	2	5	5	2	4	8	1	2	6	2	0	4	0	0	7	1	2	1	1	7	3	4	2	9	9	10	4	1	2	4	1	5	5	8
LMOSA_16310	344	266	215	332	381	370	456	397	421	351	386	436	434	321	640	685	696	665	586	435	850	667	1245	2317	1011	1926	1466	466	266	365	263	461	357	373	297	367	682	439	578	1337	1181	763	955	1154	701	503	682	1068	812
LMOSA_16320	7	8	10	6	5	8	8	8	13	9	10	13	11	5	7	40	9	8	6	12	14	5	5	14	5	5	12	4	3	10	1	16	8	7	12	6	11	15	9	18	28	7	17	24	22	16	16	33	14
LMOSA_16330	97	85	125	127	148	137	89	75	93	52	77	77	65	37	74	76	87	74	25	17	56	35	46	118	36	109	32	53	36	90	27	114	93	50	47	81	74	66	88	120	95	69	72	113	54	55	45	127	105
LMOSA_16340	39	22	33	21	54	47	28	17	31	22	41	54	12	9	24	18	19	35	21	9	42	38	29	34	53	44	35	8	13	18	9	19	23	13	13	16	26	9	30	24	11	22	12	26	13	30	16	31	25
LMOSA_16350	11	6	18	8	8	20	13	14	9	9	1	18	7	7	5	11	11	6	7	1	14	4	5	7	9	11	6	4	2	4	4	1	3	2	10	4	8	1	10	5	2	8	3	6	9	2	0	7	5
LMOSA_16360	1	4	4	5	2	6	4	7	7	3	4	2	3	3	5	0	3	2	0	0	1	3	5	9	1	10	4	3	2	1	2	0	2	1	3	1	6	5	0	6	1	2	2	2	1	3	0	5	2
LMOSA_16370	2	0	2	0	1	2	4	5	0	5	4	3	3	0	2	1	2	0	1	2	6	2	0	2	0	2	5	1	0	2	1	1	2	1	2	6	1	0	1	2	1	0	1	0	1	1	1	5	1
LMOSA_16380	2	4	1	3	5	5	4	4	8	4	2	3	2	3	3	3	0	4	0	0	4	1	0	10	2	5	0	5	0	3	1	7	3	0	0	4	6	3	4	11	8	8	3	3	2	3	7	13	7
LMOSA_16390	0	0	0	0	0	0	0	0	0	0	0	0	0	0	0	0	0	0	0	0	0	0	0	0	0	1	0	0	0	0	0	0	0	0	0	0	0	0	0	0	0	0	0	0	0	0	0	0	0
LMOSA_1640	354	250	180	272	284	202	307	218	208	238	208	173	287	239	300	0	565	246	206	132	200	195	260	353	310	327	275	354	240	421	247	491	234	294	276	358	413	242	303	233	217	142	226	227	180	195	229	304	308
LMOSA_16400	0	0	0	0	0	0	0	0	0	0	0	0	0	0	0	0	0	0	0	0	0	2	0	0	0	1	0	0	0	0	0	0	0	0	0	0	0	0	0	0	0	0	0	0	0	0	0	1	0
LMOSA_16410	0	0	0	0	0	0	0	0	0	0	0	0	0	0	0	0	0	0	0	0	0	0	0	0	0	0	0	1	0	0	0	0	0	0	0	0	1	0	2	0	0	0	1	0	0	0	0	0	0
LMOSA_16420	0	0	0	0	0	0	0	0	0	0	1	0	0	0	0	2	0	0	0	0	1	0	0	2	0	0	0	2	0	1	0	0	0	0	0	1	0	1	1	0	0	0	0	0	0	0	0	0	0
LMOSA_16430	0	0	0	0	0	0	2	0	0	0	1	0	0	0	0	1	0	0	0	0	1	0	0	0	0	0	0	0	1	0	0	0	0	0	0	0	0	0	1	0	1	0	0	0	0	0	0	0	0
LMOSA_16440	2	1	1	1	4	2	1	0	2	1	0	1	1	1	2	9	2	2	0	1	1	1	0	3	1	1	1	4	2	7	2	0	0	2	3	1	3	1	1	4	1	1	2	3	5	3	3	4	1
LMOSA_16450	3	2	3	3	1	2	2	2	0	1	1	1	1	1	2	6	1	2	0	2	1	0	0	2	0	4	0	2	0	3	1	3	0	4	0	2	3	1	1	1	0	1	1	0	0	0	0	1	2
LMOSA_16460	1	1	1	0	4	2	1	0	0	0	0	0	0	0	1	7	1	0	0	0	1	0	2	6	0	8	1	0	0	4	2	2	0	0	0	1	3	2	1	1	0	1	0	2	0	2	0	0	2
LMOSA_16470	0	0	4	3	6	2	7	0	2	2	6	2	3	1	0	8	7	3	3	1	7	0	2	0	1	11	5	3	2	1	1	10	3	4	3	5	4	6	5	4	3	3	2	2	5	3	3	4	2
LMOSA_16480	3	2	3	3	5	6	1	1	3	5	6	4	3	1	3	0	10	3	0	2	5	0	3	3	2	5	3	2	2	6	6	1	3	5	2	2	4	3	1	8	2	5	6	9	2	5	2	6	2
LMOSA_16490	11	3	2	2	3	7	4	3	4	1	4	3	10	3	2	1	11	4	4	1	6	6	5	6	2	6	3	9	7	7	1	4	5	2	4	5	4	3	8	6	4	0	4	14	5	3	1	9	8
LMOSA_1650	3	3	1	2	3	2	1	3	1	3	0	0	4	2	4	0	2	1	3	2	3	0	1	7	2	6	1	0	1	5	1	9	5	3	1	2	7	3	2	16	8	4	8	14	9	7	9	14	7
LMOSA_16500	28	18	15	37	28	23	41	27	26	15	20	26	17	18	14	10	28	14	10	8	12	9	11	23	15	19	6	110	47	45	37	51	32	28	19	35	57	34	30	35	13	27	24	32	17	11	17	23	30
LMOSA_16510	13	12	15	13	10	8	13	19	13	12	8	15	15	10	11	3	24	6	7	3	7	6	10	20	3	13	11	37	22	42	15	32	25	16	7	15	21	16	17	12	16	8	13	16	3	12	11	20	17
LMOSA_16530	35	24	24	37	40	33	61	21	35	30	37	37	29	26	35	7	72	17	17	13	25	17	34	45	25	39	18	78	47	73	29	58	62	39	26	42	57	35	38	35	33	33	36	37	32	27	28	41	39
LMOSA_16540	15	7	2	9	18	9	13	16	14	11	6	6	5	1	9	0	18	4	5	1	3	2	7	9	9	14	2	13	14	22	6	18	9	15	6	14	14	15	16	7	10	6	12	13	7	4	10	8	16
LMOSA_16550	12	7	10	9	16	9	16	9	13	9	19	21	14	8	11	1	16	10	11	8	21	13	31	34	11	31	15	18	15	15	8	15	15	13	10	17	18	13	22	19	12	6	8	16	8	11	14	23	14
LMOSA_16560	11	8	16	15	14	13	20	19	14	16	13	20	19	13	21	24	31	9	14	12	30	18	27	35	32	52	24	21	12	23	12	9	15	18	15	16	27	23	30	22	20	17	27	29	15	17	25	35	25
LMOSA_16570	10	6	5	10	15	8	9	12	12	8	6	12	14	4	4	4	12	6	5	5	10	11	20	36	15	35	10	13	10	12	11	18	4	3	11	12	12	19	18	18	12	7	14	19	8	11	11	16	19
LMOSA_16580	20	11	15	13	13	9	19	21	13	14	15	30	19	16	17	0	40	19	22	18	38	26	19	61	20	33	27	11	12	25	8	34	13	14	8	13	28	29	22	45	51	46	30	34	28	23	33	58	28
LMOSA_16590	8	8	1	4	8	12	11	12	7	10	14	19	8	8	7	3	20	11	6	6	18	6	13	20	5	18	16	8	7	22	2	11	8	7	3	8	24	10	20	20	24	7	16	14	11	5	11	26	10
LMOSA_1660	93	81	57	56	51	68	38	45	29	46	35	45	25	26	42	0	25	43	14	8	37	12	12	25	17	15	17	27	17	20	16	34	16	47	26	43	90	49	62	62	43	24	31	45	32	32	53	129	76
LMOSA_16600	10	4	11	14	11	12	13	17	15	12	4	7	11	21	20	31	26	18	17	9	22	8	18	22	7	26	17	10	6	10	4	13	11	8	9	16	18	15	23	27	13	19	14	14	14	19	22	39	19
LMOSA_16610	170	116	81	80	103	81	159	112	91	96	92	80	131	122	164	63	229	115	98	41	87	79	91	170	74	142	86	183	142	137	103	155	111	168	108	180	178	156	192	206	125	112	162	193	111	115	136	181	154
LMOSA_16620	122	69	52	73	75	66	103	98	60	98	84	88	95	69	105	77	103	83	44	33	60	39	55	101	100	62	85	70	67	81	88	85	32	49	34	34	73	62	72	47	26	35	38	63	38	40	41	84	82
LMOSA_16630	3	6	4	4	5	4	4	5	2	6	3	5	1	2	8	3	12	9	7	7	9	5	16	23	12	5	10	3	5	1	7	4	2	7	5	3	6	5	9	9	7	10	14	16	15	15	8	18	3
LMOSA_16640	6	9	7	13	17	9	10	8	11	10	9	18	12	8	14	21	8	10	14	7	11	10	18	13	12	18	9	3	3	13	5	13	13	6	2	5	7	4	11	8	21	11	7	13	20	4	15	22	14
LMOSA_16650	20	14	10	7	20	16	14	19	21	18	16	14	11	22	20	14	19	19	23	24	30	23	19	20	6	25	36	10	7	34	11	35	10	12	5	9	30	8	19	22	39	26	20	18	23	12	36	75	26
LMOSA_16660	11	15	17	14	38	21	34	13	16	15	13	15	24	34	19	16	12	12	10	6	17	9	10	12	8	12	5	17	12	21	11	28	7	10	6	8	24	21	26	37	27	30	33	35	32	24	27	62	26
LMOSA_16670	236	124	129	193	235	215	266	148	134	189	146	172	222	188	316	159	442	225	152	120	162	128	260	352	197	264	184	409	220	268	180	311	184	243	261	411	361	321	407	318	218	207	397	387	231	226	332	443	389
LMOSA_16680	313	162	199	284	317	288	385	272	251	243	225	225	336	286	585	376	686	362	261	147	272	190	289	413	215	301	216	559	267	378	291	417	301	508	338	678	627	615	705	743	362	409	784	746	413	507	576	798	736
LMOSA_16690	80	50	47	60	73	63	97	59	77	63	51	69	96	73	132	71	150	74	58	48	41	36	37	54	22	42	24	114	62	85	59	70	72	122	75	140	124	136	109	178	108	101	212	188	111	128	107	186	165
LMOSA_1670	6	2	0	1	3	1	5	3	1	2	4	1	1	2	4	0	5	1	1	1	0	0	3	4	2	11	3	1	1	5	1	0	1	3	2	3	2	0	7	3	4	1	0	2	0	6	3	3	5
[truncated: 2,204 more rows]
[truncated: 59 more columns]
